# Supplementary material for: A general, versatile and divergent synthesis of selectively deuterated amines
Source: Royal Society of Chemistry journal article supplement (doi:10.1039/d1sc02622d), 2021-01-01
Supplement: d1sc02622d1.pdf [file d1sc02622d1.pdf]

*Supporting Information*

**A General, Versatile and Divergent Synthesis of Selectively  
Deuterated Amines**

Morgan Lecomte, Mounsef Lahboubi, Pierre Thilmany, Adil El Bouzakhi  
and Gwilherm Evano\*

*Laboratoire de Chimie Organique, Service de Chimie et PhysicoChimie Organiques, Université libre de Bruxelles,  
Avenue F. D. Roosevelt 50, CP160/06, 1050 Brussels, Belgium.*

|                                                                                                                  |     |
|------------------------------------------------------------------------------------------------------------------|-----|
| General Information. ....                                                                                        | S2  |
| Experimental Procedures and Characterization Data:<br>Unreported Starting Ynamides. ....                         | S3  |
| Experimental Procedures and Characterization Data:<br>Reduction/Reductive Deuteration of ynamides. ....          | S5  |
| Experimental Procedures and Characterization Data:<br>Synthesis of Deuterated Biologically Relevant Amines. .... | S25 |
| Experimental Procedures and Characterization Data:<br>Reduction/Reductive Deuteration of Ynol Ethers. ....       | S33 |
| <sup>1</sup> H and <sup>13</sup> C NMR spectra. ....                                                             | S35 |

## General Information.

All reactions were carried out in oven-dried glassware under an argon atmosphere employing standard techniques in handling air-sensitive materials.

All reagents and solvents were reagent grade. Acetonitrile, dichloromethane and *N,N*-dimethylformamide were freshly distilled from calcium hydride under argon. Tetrahydrofuran and 1,2-dimethoxyethane was freshly distilled from sodium/benzophenone under argon. 1,4-Dioxane (99.5%, Extra Dry over Molecular Sieve, AcroSeal®) and toluene (99.5%, Extra Dry over Molecular Sieve, AcroSeal®) were purchased from ACROS Organics and used as supplied.

Copper(I) iodide (99,999% purity), trifluoromethanesulfonic acid-*d* (98% D), triethylsilane (99% purity) and triethyl(silane-*d*) (97% D) were purchased from Sigma-Aldrich and used as supplied unless otherwise stated. Trifluoromethanesulfonic acid (98+% purity) was purchased from Alfa Aesar and used as supplied. Deuterium oxide (99.9% D) was purchased from Eurisotop and used as supplied. Finely powdered anhydrous cesium carbonate was used for copper-mediated coupling reactions. All other reagents were used as supplied.

Reactions were magnetically stirred and monitored by thin layer chromatography using Merck-Kieselgel 60F<sub>254</sub> plates or Macherey-Nagel Pre Coated TLC-sheets Alugram® Xtra Sil/UV<sub>254</sub>. Flash chromatography was performed with silica gel 60 (particle size 35-70 μm) supplied by Merck or silica gel 60 (particle size 15 - 40 μm) supplied by Macherey-Nagel. Yields refer to chromatographically and spectroscopically pure compounds unless otherwise stated.

Proton NMR spectra were recorded using an internal deuterium lock at ambient temperature on Bruker 300, Varian 400 MHz or JEOL 400 and 600 MHz spectrometers. Internal reference of  $\delta_{\text{H}}$  7.26 was used for CDCl<sub>3</sub>,  $\delta_{\text{H}}$  3.31 was used for CD<sub>3</sub>OH and  $\delta_{\text{H}}$  3.31 was used for CD<sub>3</sub>OD. Data are presented as follows: chemical shift (in ppm on the  $\delta$  scale relative to  $\delta_{\text{TMS}} = 0$ ), multiplicity (s = singlet, d = doublet, t = triplet, q = quartet, quint. = quintuplet, sext. = sextuplet, m = multiplet, br. = broad, app. = apparent), coupling constant (J/Hz) and integration. Resonances that are either partially or fully obscured are denoted obscured (obs.). Carbon-13 NMR spectra were recorded at 75 or 100 MHz using CDCl<sub>3</sub> ( $\delta_{\text{C}}$  77.16), CD<sub>2</sub>Cl<sub>2</sub> ( $\delta_{\text{C}}$  53.84), CD<sub>3</sub>OH ( $\delta_{\text{C}}$  49.00) and CD<sub>3</sub>OD ( $\delta_{\text{C}}$  49.00) as internal references. Fluorine-19 NMR spectra were recorded at 376 MHz using CF<sub>3</sub>CH<sub>2</sub>OH ( $\delta_{\text{F}}$  -77.59) as internal reference. Deuterium NMR spectra were recorded at 92 MHz using C<sub>2</sub>D<sub>2</sub>Cl<sub>4</sub> ( $\delta_{\text{D}}$  6.00) as internal reference.

Melting points were recorded on a Stuart Scientific Analogue SMP11. Infrared spectra were recorded on a Bruker Alpha (ATR). High resolution mass spectra (HRMS) in positive mode were recorded using a 6520 series quadrupole time-of-flight (Q-TOF) mass spectrometer (Agilent) fitted with a multimode ion source.

Freshly prepared trifluoromethanesulfonic acid-*d*:<sup>S1</sup>

An oven dried 25 mL round bottom flask was successively charged with deuterium oxide (99.9%, 1.5 mL, 82.83 mmol) and trifluoromethanesulfonic anhydride (15 mL, 88.61 mmol). The resulting colorless mixture was stirred and refluxed for 1 hour until persistence of a dark color, then fractionally distilled to afford trifluoromethanesulfonic acid-*d* (>99% D) that could be used without further purification.

## Experimental Procedure and Characterization Data: Unreported Starting Ynamides

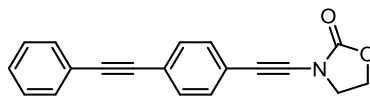

9c

**3-[[4-(Phenylethynyl)phenyl]ethynyl]oxazolidin-2-one 9c.** This compound was prepared according to a previously reported procedure.<sup>S2</sup> A 25 mL round bottom flask was successively charged with 2-oxazolidinone (2.16 g, 24.8 mmol), {[4-(phenylethynyl)phenyl]ethynyl}copper (1.46 g, 5.52 mmol) and acetonitrile (14 mL). The resulting bright yellow slurry was then treated with *N,N,N',N'*-tetramethylethylenediamine (830  $\mu$ L, 5.52 mmol) and the reaction mixture was vigorously stirred at rt and under an atmosphere of oxygen (balloon). After complete disappearance of the alkynylcopper reagent (complete dissolution to a deep blue homogeneous reaction mixture: typically 24-48 h), the crude reaction mixture was filtered over a plug of silica gel (washed with EtOAc) and concentrated under reduced pressure. The residue was finally purified by flash chromatography over silica gel (cyclohexane/ $\text{CH}_2\text{Cl}_2$ : gradient from 30/70 to 0/100) to afford the desired ynamide as a white solid. Yield: 50% (790 mg, 2.75 mmol).  $^1\text{H}$  NMR (300 MHz,  $\text{CDCl}_3$ ):  $\delta$  7.56-7.31 (m, 9H), 4.54-4.44 (m, 2H), 4.06-3.96 (m, 2H);  $^{13}\text{C}$  NMR (75 MHz,  $\text{CDCl}_3$ ):  $\delta$  155.9, 131.7, 131.6, 131.5, 128.6, 128.5, 123.1 (2C), 122.1, 91.3, 89.1, 80.8, 71.2, 63.2, 47.1; ESIHRMS  $m/z$  calcd for  $\text{C}_{19}\text{H}_{14}\text{NO}_2$  [ $\text{M}+\text{H}$ ] $^+$  288.1019, found 288.1025.

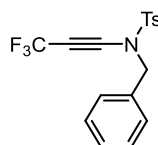

9k

***N*-(*p*-Toluenesulfonyl)-*N*-benzyl-trifluoromethylethynylamine 9k.** This compound was prepared according to a previously reported procedure.<sup>S3</sup> A 250 mL round bottom flask was charged with copper iodide (800 mg, 4.20 mmol), potassium carbonate (1.16 g, 8.40 mmol), *N,N,N',N'*-tetramethylethylenediamine (625  $\mu$ L, 4.20 mmol) and *N,N*-dimethylformamide (12.9 mL). The resulting deep blue mixture was vigorously stirred at rt under air atmosphere for 15 minutes. Trimethyl(trifluoromethyl)silane (830  $\mu$ L, 5.60 mmol) was next added and the resulting deep green mixture was stirred for an additional 5 minutes under air atmosphere, then cooled to 0  $^\circ\text{C}$ . A solution of *N*-(*p*-toluenesulfonyl)-*N*-benzyl-ethynylamine (799 mg, 2.80 mmol) and trimethyl(trifluoromethyl)silane (830  $\mu$ L, 5.60 mmol) in *N,N*-dimethylformamide (12.9 mL), previously cooled to 0  $^\circ\text{C}$ , was then added in one portion. The reaction mixture was stirred at 0  $^\circ\text{C}$  for 30 minutes under air atmosphere, allowed to warm to rt, and stirred for an additional 24 hours before being quenched with water (30 mL). The layers were separated and the aqueous layer was extracted with  $\text{Et}_2\text{O}$  (3x). The combined organic layers were washed with water (3x), brine, dried over  $\text{MgSO}_4$ , filtered and concentrated under reduced pressure. The crude product was finally purified by flash column chromatography (petroleum ether/ $\text{EtOAc}$ : 95/5) to afford the desired trifluoromethylated ynamide as an off white solid. Yield: 38% (372 mg, 1.05 mmol). Mp: 37  $^\circ\text{C}$ ;  $^1\text{H}$  NMR (400 MHz,  $\text{CDCl}_3$ ):  $\delta$  7.72 (d,  $J = 8.4$  Hz, 2H), 7.36-7.30 (m, 5H), 7.25-7.21 (m, 2H), 4.55 (s, 2H), 2.46 (s, 3H);  $^{13}\text{C}$  NMR (100 MHz,  $\text{CDCl}_3$ ):  $\delta$  145.8, 134.3, 133.2, 130.2, 129.0, 128.9, 128.9, 127.9, 115.6 (q,  $J_{\text{C-F}} = 256.8$  Hz), 81.5 (q,  $J_{\text{C-F}} = 6.2$  Hz), 60.9 (q,  $J_{\text{C-F}} = 54.0$  Hz), 55.4, 21.9;  $^{19}\text{F}$  (376 MHz,  $\text{CDCl}_3$ ):  $\delta$  -48.7; IR (ATR):  $\nu_{\text{max}}$  2880, 2254, 1598, 1368, 1170, 1127, 1088, 942, 813, 714, 663  $\text{cm}^{-1}$ ; ESIHRMS  $m/z$  calcd for  $\text{C}_{17}\text{H}_{18}\text{F}_3\text{N}_2\text{O}_2\text{S}$  [ $\text{M}+\text{NH}_4$ ] $^+$  371.1036, found 371.1040.

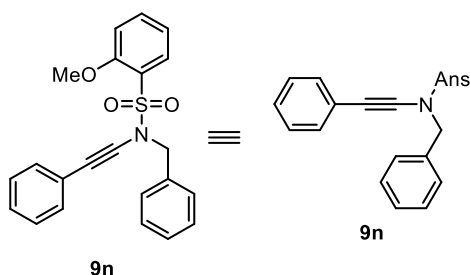

***N*-(*o*-Anisylsulfonyl)-*N*-benzyl-phenylethyneamine **9n**.** This compound was prepared according to a previously reported procedure.<sup>S4</sup> A pressure tube was charged with *N*-(*o*-anisylsulfonyl)-*N*-benzylamine **16**. (2.50 g, 9.00 mmol), potassium carbonate (2.50 g, 18.0 mmol), copper sulfate pentahydrate (225 mg, 900  $\mu$ mol), 1,10-phenanthroline (324 mg, 1.80 mmol) and (bromoethynyl)benzene (1.80 g, 9.90 mmol). The tube was fitted with a rubber septum, evacuated under high vacuum and backfilled with argon three times. Dry toluene (20 mL) was next added, the rubber septum was replaced by a Teflon-coated screw cap and the mixture was heated at 70 °C for 48 hours. The reaction mixture was then cooled to rt, filtered over a plug of silica gel (washed with EtOAc) and concentrated under reduced pressure. The crude residue was finally purified by flash column chromatography over silica gel (petroleum ether/EtOAc: 80/20) affording the desired ynamide as a dark orange solid. Yield: 98% (3.3 g, 8.8 mmol). Mp: 75 °C; <sup>1</sup>H NMR (300 MHz, CDCl<sub>3</sub>):  $\delta$  8.02 (dd, *J* = 7.8 and 1.7 Hz, 1H), 7.59 (ddd, *J* = 8.4, 7.5 and 1.7 Hz, 1H), 7.38-7.29 (m, 5H), 7.22-7.14 (m, 5H), 7.08 (app. td, *J* = 7.5 and 0.9 Hz, 1H), 7.01 (d, *J* = 8.4 Hz, 1H), 4.75 (s, 2H), 3.88 (s, 3H); <sup>13</sup>C NMR (100 MHz, CDCl<sub>3</sub>):  $\delta$  157.3, 135.7, 135.4, 132.1, 131.1, 128.9, 128.6, 128.3, 128.2, 127.5, 126.2, 123.3, 120.4, 112.4, 82.8, 71.5, 56.2, 56.0; IR (ATR):  $\nu_{\text{max}}$  3031, 2945, 2234, 1592, 1481, 1357, 1282, 1162, 1069, 1017, 911, 804, 779, 752, 731, 695 cm<sup>-1</sup>; ESIHRMS *m/z* calcd for C<sub>22</sub>H<sub>20</sub>NO<sub>3</sub>S [M+H]<sup>+</sup> 378.1158, found 378.1141.

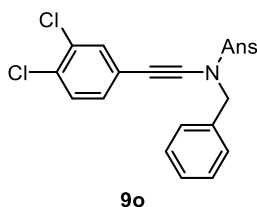

***N*-(*o*-Anisylsulfonyl)-(3,4-dichlorophenyl)ethyneamine **9o**.** This compound was prepared according to a previously reported procedure.<sup>S4</sup> A pressure tube was charged with the *N*-(*o*-anisylsulfonyl)-*N*-benzylamine **16**. (881 mg, 3.18 mmol), potassium carbonate (879 mg, 6.36 mmol), copper sulfate pentahydrate (79 mg, 318  $\mu$ mol), 1,10-phenanthroline (115 mg, 636  $\mu$ mol) and 4-(bromoethynyl)-1,2-dichlorobenzene (875 mg, 3.50 mmol). The tube was fitted with a rubber septum, evacuated under high vacuum and backfilled with argon three times. Dry toluene (3.2 mL) was next added, the rubber septum was replaced by a Teflon-coated screw cap and the mixture was heated at 70 °C for 48 hours. The reaction mixture was then cooled to rt, filtered over a plug of silica gel (washed with EtOAc) and concentrated under reduced pressure. The crude residue was finally purified by flash column chromatography over silica gel (petroleum ether/EtOAc: 80/20) affording the desired ynamide as a yellow solid. Yield: 69% (1.0 g, 2.2 mmol). Mp: 84 °C; <sup>1</sup>H NMR (300 MHz, CDCl<sub>3</sub>):  $\delta$  8.01 (dd, *J* = 8.1 and 1.8 Hz, 1H), 7.61 (ddd, *J* = 8.4, 7.5 and 1.7 Hz, 1H), 7.35-7.29 (m, 5H), 7.26 (obs. d, *J* = 8.3 Hz, 1H), 7.21 (d, *J* = 1.9 Hz, 1H), 7.10 (ddd, *J* = 7.9, 7.5 and 1.0 Hz, 1H), 7.02 (d, *J* = 8.4 Hz, 1H), 6.97 (dd, *J* = 8.4 and 1.9 Hz, 1H), 4.73 (s, 2H), 3.88 (s, 3H); <sup>13</sup>C NMR (100 MHz, CD<sub>2</sub>Cl<sub>2</sub>):  $\delta$  157.7, 136.3, 135.6, 132.6, 132.5, 132.1, 131.8, 130.6, 130.3, 129.0, 128.9, 128.7, 126.1, 123.7, 120.7, 113.0, 85.3, 69.9, 56.6, 56.2; IR (ATR):  $\nu_{\text{max}}$  3114, 3067, 2238, 1482, 1355, 1283, 1161, 1070, 1017, 830, 819, 806, 758, 721, 693, 610 cm<sup>-1</sup>; ESIHRMS *m/z* calcd for C<sub>22</sub>H<sub>18</sub>Cl<sub>2</sub>NO<sub>3</sub>S [M+H]<sup>+</sup> 446.0379, found 446.0387.

## Experimental Procedure and Characterization Data: Reduction/Reductive Deuteration of Ynamides

### General procedure I: synthesis of amines

To a vigorously stirred solution of the ynamide (400  $\mu\text{mol}$ ) in dichloromethane (1.5 mL) under an argon atmosphere was added triethylsilane (320  $\mu\text{L}$ , 2.0 mmol). Trifluoromethanesulfonic acid (88  $\mu\text{L}$ , 1.0 mmol) was then added dropwise at 0  $^{\circ}\text{C}$  and the mixture was stirred at rt overnight. The resulting yellow/brown reaction mixture was then poured into a 1M aqueous solution of NaOH. The layers were separated and the aqueous layer was extracted with dichloromethane (2x). Combined organic layers were dried over  $\text{MgSO}_4$ , filtered and concentrated. The crude residue was finally purified by flash column chromatography over silica gel to give the desired amine.

### General procedure II: synthesis of $\alpha$ -deuterated amines

To a vigorously stirred solution of the ynamide (300  $\mu\text{mol}$ ) in dichloromethane (1.1 mL) under an argon atmosphere was added triethyl(silane-*d*) (240  $\mu\text{L}$ , 1.5 mmol). Trifluoromethanesulfonic acid (66  $\mu\text{L}$ , 750  $\mu\text{mol}$ ) was then added dropwise at 0  $^{\circ}\text{C}$  and the mixture was stirred at rt overnight. The resulting yellow/brown reaction mixture was then poured into a 1M aqueous solution of NaOH. The layers were separated and the aqueous layer was extracted with dichloromethane (2x). Combined organic layers were dried over  $\text{MgSO}_4$ , filtered and concentrated. The crude residue was finally purified by flash column chromatography over silica gel to give the desired  $\alpha,\alpha$ -deuterated amine.

### General procedure III: synthesis of $\beta$ -deuterated amines

To a vigorously stirred solution of the ynamide (300  $\mu\text{mol}$ ) in dichloromethane (1.1 mL) under an argon atmosphere was added triethylsilane (240  $\mu\text{L}$ , 1.5 mmol). Trifluoromethanesulfonic acid-*d* (66  $\mu\text{L}$ , 750  $\mu\text{mol}$ ) was then added dropwise at 0  $^{\circ}\text{C}$  and the mixture was stirred at rt overnight. The resulting yellow/brown reaction mixture was then poured into a 1M aqueous solution of NaOH. The layers were separated and the aqueous layer was extracted with dichloromethane (2x). Combined organic layers were dried over  $\text{MgSO}_4$ , filtered and concentrated. The crude residue was finally purified by flash column chromatography over silica gel to give the desired  $\beta,\beta$ -deuterated amine.

### General procedure IV: synthesis of $\alpha,\beta$ -deuterated amines

To a vigorously stirred solution of the ynamide (300  $\mu\text{mol}$ ) in dichloromethane (1.1 mL) under an argon atmosphere was added triethyl(silane-*d*) (240  $\mu\text{L}$ , 1.5 mmol). Trifluoromethanesulfonic acid-*d* (66  $\mu\text{L}$ , 750  $\mu\text{mol}$ ) was then added dropwise at 0  $^{\circ}\text{C}$  and the mixture was stirred at rt overnight. The resulting yellow/brown reaction mixture was then poured into a 1M aqueous solution of NaOH. The layers were separated and the aqueous layer was extracted with dichloromethane (2x). Combined organic layers were dried over  $\text{MgSO}_4$ , filtered and concentrated. The crude residue was finally purified by flash column chromatography over silica gel to give the desired  $\alpha,\alpha,\beta,\beta$ -deuterated amine.

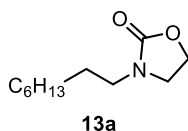

**3-Octyloxazolidin-2-one 13a.** Prepared according to general procedure I starting from 350  $\mu\text{mol}$  of the corresponding ynamide. Yield: 72% (50 mg, 251  $\mu\text{mol}$ ). Solvent system for flash column chromatography: cyclohexane/EtOAc: 50/50; White solid;  $^1\text{H}$  NMR (300 MHz,  $\text{CDCl}_3$ ):  $\delta$  4.33-4.26 (m, 2H), 3.57-3.49 (m, 2H), 3.23 (t,  $J = 7.3$  Hz, 2H), 1.52 (quint.,  $J = 7.1$  Hz, 2H), 1.35-1.19 (m, 10H), 0.86 (app. t,  $J = 6.9$  Hz, 3H);  $^{13}\text{C}$  NMR (75 MHz,  $\text{CDCl}_3$ ):  $\delta$  158.6, 61.7, 44.6, 44.4, 31.8, 29.3, 29.2, 27.5, 26.7, 22.7, 14.2; ESIHRMS  $m/z$  calcd for  $\text{C}_{11}\text{H}_{22}\text{NO}_2$   $[\text{M}+\text{H}]^+$  200.1645, found 200.1645.

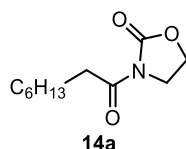

**3-Octanoyloxazolidin-2-one 14a.** Solvent system for flash column chromatography: cyclohexane/EtOAc: 90/10; Colorless oil;  $^1\text{H}$  NMR (400 MHz,  $\text{CDCl}_3$ ):  $\delta$  4.38 (t,  $J = 8.1$  Hz, 2H), 3.98 (t,  $J = 8.1$  Hz, 2H), 2.87 (t,  $J = 7.6$  Hz, 2H), 1.62 (quint.,  $J = 7.4$  Hz, 2H), 1.37-1.19 (m, 8H), 0.85 (app. t,  $J = 6.8$  Hz, 3H);  $^{13}\text{C}$  NMR (100 MHz,  $\text{CDCl}_3$ ):  $\delta$  173.7, 153.6, 62.1, 42.6, 35.1, 31.7, 29.1, 29.1, 24.3, 22.6, 14.1; IR (ATR):  $\nu_{\text{max}}$  2956, 2927, 2857, 1779, 1700, 1387, 1363, 1335, 1273, 1225, 1131, 1098, 1040, 1008, 761, 702; ESIHRMS  $m/z$  calcd for  $\text{C}_{11}\text{H}_{20}\text{NO}_3$   $[\text{M}+\text{H}]^+$  214.1438, found 214.1436.

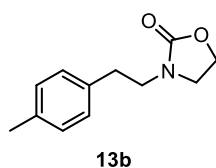

**3-(4-Methylphenethyl)oxazolidin-2-one 13b.** Prepared according to general procedure I. Yield: 77% (63 mg, 307  $\mu\text{mol}$ ). Solvent system for flash column chromatography: cyclohexane/EtOAc: 50/50; White solid;  $^1\text{H}$  NMR (400 MHz,  $\text{CDCl}_3$ ):  $\delta$  7.11 (app. s, 4H), 4.27-4.21 (m, 2H), 3.53-3.48 (m, 2H), 3.44-3.38 (m, 2H), 2.84 (t,  $J = 7.4$  Hz, 2H), 2.32 (s, 3H);  $^{13}\text{C}$  NMR (100 MHz,  $\text{CDCl}_3$ ):  $\delta$  158.5, 136.3, 135.4, 129.5, 128.7, 61.8, 45.8, 45.2, 33.8, 21.2; ESIHRMS  $m/z$  calcd for  $\text{C}_{12}\text{H}_{16}\text{NO}_2$   $[\text{M}+\text{H}]^+$  206.1176, found 206.1175.

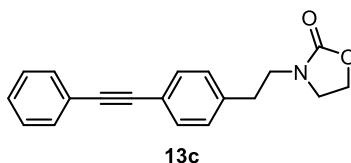

**3-[4-(Phenylethynyl)phenethyl]oxazolidin-2-one 13c.** Prepared according to general procedure I starting from 350  $\mu\text{mol}$  of the corresponding ynamide. Yield: 42% (43 mg, 148  $\mu\text{mol}$ ). Solvent system for flash column chromatography: cyclohexane/EtOAc: 30/70; Pale yellow solid;  $^1\text{H}$  NMR (300 MHz,  $\text{CDCl}_3$ ):  $\delta$  7.56-7.46 (m, 4H), 7.38-7.31 (m, 3H), 7.22 (d,  $J = 8.2$  Hz, 2H), 4.29-4.20 (m, 2H), 3.53 (t,  $J = 7.3$  Hz, 2H), 3.44-3.35 (m, 2H), 2.91 (t,  $J = 7.3$  Hz, 2H);  $^{13}\text{C}$  NMR (75 MHz,  $\text{CDCl}_3$ ):  $\delta$  158.5, 138.8, 132.0, 131.7, 128.9, 128.5, 128.4, 123.3, 121.8, 89.5, 89.2, 61.9, 45.5, 45.3, 34.2; ESIHRMS  $m/z$  calcd for  $\text{C}_{19}\text{H}_{18}\text{NO}_2$   $[\text{M}+\text{H}]^+$  292.1332, found 292.1306.

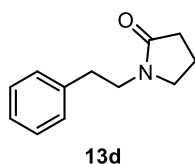

**1-Phenethylpyrrolidin-2-one 13d.** Prepared according to general procedure I. Yield: 62% (47 mg, 248  $\mu\text{mol}$ ). Solvent system for flash column chromatography: cyclohexane/EtOAc: 20/80; White solid;  $^1\text{H}$  NMR (400 MHz,  $\text{CDCl}_3$ ):  $\delta$  7.32-7.27 (m, 2H), 7.23-7.19 (m, 3H), 3.53 (t,  $J = 7.2$  Hz, 2H), 3.24 (t,  $J = 7.2$  Hz, 2H), 2.84 (t,  $J = 7.6$  Hz, 2H), 2.34 (t,  $J = 8.0$  Hz, 2H), 1.94 (quint.,  $J = 8.0$  Hz, 2H);  $^{13}\text{C}$  NMR (100 MHz,  $\text{CDCl}_3$ ):  $\delta$  175.0, 139.0, 128.8, 128.7, 126.6, 47.8, 44.1, 34.0, 31.1, 18.2; ESIHRMS  $m/z$  calcd for  $\text{C}_{12}\text{H}_{16}\text{NO}$   $[\text{M}+\text{H}]^+$  190.1226, found 190.1226. This compound has been previously reported.<sup>55</sup>

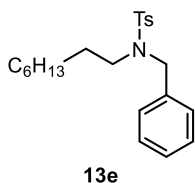

**N-Benzyl-N-octyl-*p*-toluenesulfonamide 13e.** Prepared according to general procedure I. Yield: 74% (110 mg, 294  $\mu\text{mol}$ ). Solvent system for flash column chromatography: cyclohexane/EtOAc: 90/10; Colorless oil;  $^1\text{H}$  NMR (400 MHz,  $\text{CDCl}_3$ ):  $\delta$  7.73 (d,  $J = 8.3$  Hz, 2H), 7.34-7.25 (m, 7H), 4.31 (s, 2H), 3.07 (t,  $J = 7.6$  Hz, 2H), 2.44 (s, 3H), 1.35-1.00 (m, 12H), 0.85 (t,  $J = 7.1$  Hz, 3H);  $^{13}\text{C}$  NMR (100 MHz,  $\text{CDCl}_3$ ):  $\delta$  143.2, 137.4, 136.8, 129.8, 128.6, 128.4, 127.8, 127.3, 51.9, 48.2, 31.8, 29.2, 29.1, 28.0, 26.7, 22.7, 21.6, 14.2; ESIHRMS  $m/z$  calcd for  $\text{C}_{22}\text{H}_{32}\text{NO}_2\text{S}$   $[\text{M}+\text{H}]^+$  374.2148, found 374.2153.

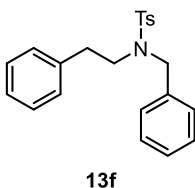

**N-Benzyl-N-phenethyl-*p*-toluenesulfonamide 13f.** Prepared according to general procedure I starting from 250  $\mu\text{mol}$  of the corresponding ynamide. Yield: 79% (72 mg, 197  $\mu\text{mol}$ ). Solvent system for flash column chromatography: cyclohexane/EtOAc: 90/10; White solid;  $^1\text{H}$  NMR (300 MHz,  $\text{CDCl}_3$ ):  $\delta$  7.74 (d,  $J = 8.1$  Hz, 2H), 7.36-7.26 (m, 7H), 7.24-7.15 (m, 3H), 6.96-6.93 (m, 2H), 4.34 (s, 2H), 3.31-3.25 (m, 2H), 2.64-2.59 (m, 2H), 2.44 (s, 3H);  $^{13}\text{C}$  NMR (75 MHz,  $\text{CDCl}_3$ ):  $\delta$  143.4, 138.6, 137.2, 136.4, 129.9, 128.8, 128.8, 128.6, 128.6, 128.0, 127.4, 126.5, 52.4, 49.6, 35.4, 21.7; ESIHRMS  $m/z$  calcd for  $\text{C}_{22}\text{H}_{24}\text{NO}_2\text{S}$   $[\text{M}+\text{H}]^+$  366.1522, found 366.1526. This compound has been previously reported.<sup>S6</sup>

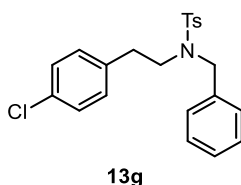

**N-Benzyl-N-(*p*-chlorophenethyl)-*p*-toluenesulfonamide 13g.** Prepared according to general procedure I. Yield: 84% (134 mg, 335  $\mu\text{mol}$ ). Solvent system for flash column chromatography: cyclohexane/EtOAc: 90/10; White solid;  $^1\text{H}$  NMR (300 MHz,  $\text{CDCl}_3$ ):  $\delta$  7.71 (d,  $J = 8.3$  Hz, 2H), 7.35-7.28 (m, 5H), 7.28-7.23 (m, 2H), 7.15 (d,  $J = 8.4$  Hz, 2H), 6.85 (d,  $J = 8.4$  Hz, 2H), 4.31 (s, 2H), 3.28-3.19 (m, 2H), 2.63-2.55 (m, 2H), 2.44 (s, 3H);  $^{13}\text{C}$  NMR (75 MHz,  $\text{CDCl}_3$ ):  $\delta$  143.5, 137.0, 136.8, 136.2, 132.3, 130.2, 129.9, 128.8, 128.7, 128.6, 128.1, 127.3, 52.6, 49.5, 34.9, 21.7; ESIHRMS  $m/z$  calcd for  $\text{C}_{22}\text{H}_{23}\text{ClNO}_2\text{S}$   $[\text{M}+\text{H}]^+$  400.1133, found 400.1109.

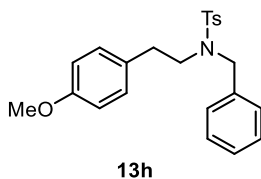

**N-Benzyl-N-(*p*-methoxyphenethyl)-*p*-toluenesulfonamide 13h.** Prepared according to general procedure I. Yield: 80% (126 mg, 319  $\mu\text{mol}$ ). Solvent system for flash column chromatography: cyclohexane/EtOAc: 90/10; White solid;  $^1\text{H}$  NMR (300 MHz,  $\text{CDCl}_3$ ):  $\delta$  7.75 (d,  $J = 8.3$  Hz, 2H), 7.36-7.27 (m, 7H), 6.87 (d,  $J = 8.6$  Hz, 2H), 6.75 (d,  $J = 8.6$  Hz, 2H), 4.34 (s, 2H), 3.76 (s, 3H), 3.31-3.21 (m, 2H),

2.62-2.53 (m, 2H), 2.44 (s, 3H);  $^{13}\text{C}$  NMR (75 MHz,  $\text{CDCl}_3$ ):  $\delta$  158.3, 143.3, 137.1, 136.4, 130.6, 129.8, 129.7, 128.7, 128.6, 127.9, 127.3, 114.0, 55.3, 52.3, 49.8, 34.4, 21.6; ESIHRMS  $m/z$  calcd for  $\text{C}_{23}\text{H}_{26}\text{NO}_3\text{S}$   $[\text{M}+\text{H}]^+$  396.1628, found 396.1635.

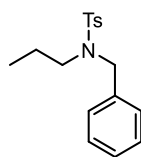

13i

**N-Benzyl-N-propyl-p-toluenesulfonamide 13i.** Prepared according to general procedure I starting from 134  $\mu\text{mol}$  of the corresponding ynamide. Yield: 89% (36 mg, 119  $\mu\text{mol}$ ). Solvent system for flash column chromatography: cyclohexane/EtOAc: 90/10; Colorless oil;  $^1\text{H}$  NMR (300 MHz,  $\text{CDCl}_3$ ):  $\delta$  7.73 (d,  $J = 8.3$  Hz, 2H), 7.35-7.26 (m, 7H), 4.32 (s, 2H), 3.09-3.01 (m, 2H), 2.44 (s, 3H), 1.34 (sext.,  $J = 7.5$  Hz, 2H), 0.70 (t,  $J = 7.4$  Hz, 3H);  $^{13}\text{C}$  NMR (75 MHz,  $\text{CDCl}_3$ ):  $\delta$  143.2, 137.3, 136.8, 129.8, 128.6, 128.3, 127.8, 127.3, 52.0, 50.0, 21.7, 21.5, 11.3; ESIHRMS  $m/z$  calcd for  $\text{C}_{17}\text{H}_{22}\text{NO}_2\text{S}$   $[\text{M}+\text{H}]^+$  304.1366, found 304.1350.

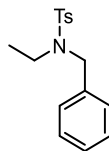

13j

**N-Benzyl-N(ethyl)-4-methylbenzenesulfonamide 13j.** Prepared according to general procedure I starting from 175  $\mu\text{mol}$  of the corresponding ynamide. Yield: 50% (25 mg, 87  $\mu\text{mol}$ ). Solvent system for flash column chromatography: petroleum ether/EtOAc: 95/5; Yellow oil;  $^1\text{H}$  NMR (400 MHz,  $\text{CDCl}_3$ ):  $\delta$  7.74 (d,  $J = 8.3$  Hz, 2H), 7.35-7.26 (m, 7H), 4.34 (s, 2H), 3.19 (q,  $J = 7.2$  Hz, 2H), 2.44 (s, 3H), 0.92 (t,  $J = 7.2$  Hz, 3H);  $^{13}\text{C}$  NMR (75 MHz,  $\text{CDCl}_3$ ):  $\delta$  143.3, 137.5, 136.7, 129.9, 128.7, 128.4, 127.9, 127.3, 51.2, 42.4, 21.7, 13.4. This compound has been previously reported.<sup>S7</sup>

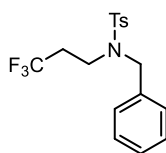

13k

**N-Benzyl-N(3,3,3-trifluoropropyl)-4-methylbenzenesulfonamide 13k.** Prepared according to general procedure I starting from 140  $\mu\text{mol}$  of the corresponding ynamide. Yield: 40% (20 mg, 56  $\mu\text{mol}$ ). Solvent system for flash column chromatography: petroleum ether/EtOAc: 95/5; Yellow solid; Mp: 77  $^\circ\text{C}$ ;  $^1\text{H}$  NMR (400 MHz,  $\text{CDCl}_3$ ):  $\delta$  7.74 (d,  $J = 8.2$  Hz, 2H), 7.38-7.31 (m, 5H), 7.30-7.26 (m, 2H), 4.30 (s, 2H), 3.29-3.23 (m, 2H), 2.46 (s, 3H), 2.23-2.09 (m, 2H);  $^{13}\text{C}$  NMR (100 MHz,  $\text{CDCl}_3$ ):  $\delta$  144.0, 136.1, 135.7, 130.1, 129.0, 128.6, 128.5, 127.4, 125.7 (q,  $J_{\text{C-F}} = 277.0$  Hz), 53.2, 41.6 (q,  $J_{\text{C-F}} = 4.2$  Hz), 33.9 (q,  $J_{\text{C-F}} = 28.0$  Hz), 21.7;  $^{19}\text{F}$  (376 MHz,  $\text{CDCl}_3$ ):  $\delta$  -66.4 (t,  $J = 10.7$  Hz); IR (ATR):  $\nu_{\text{max}}$  2926, 1459, 1324, 1246, 1180, 1153, 1127, 1090, 972, 814, 735, 697, 667  $\text{cm}^{-1}$ ; ESIHRMS  $m/z$  calcd for  $\text{C}_{17}\text{H}_{19}\text{F}_3\text{NO}_2\text{S}$   $[\text{M}+\text{H}]^+$  358.1083, found 358.1085.



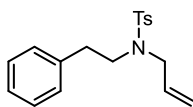

13l

**N-Allyl-N-phenethyl-p-toluenesulfonamide 13l.** Prepared according to general procedure I. Yield: 75% (94 mg, 298  $\mu\text{mol}$ ). Solvent system for flash column chromatography: cyclohexane/EtOAc: 90/10; White solid;  $^1\text{H}$  NMR (300 MHz,  $\text{CDCl}_3$ ):  $\delta$  7.70 (d,  $J = 8.2$  Hz, 2H), 7.32-7.25 (m, 4H), 7.25-7.18 (m, 1H), 7.18-7.11 (m, 2H), 5.64 (ddt,  $J = 16.6, 10.1$  and  $6.5$  Hz, 1H), 5.24-5.12 (m, 2H), 3.81 (d,  $J = 6.5$  Hz, 2H), 3.39-3.29 (m, 2H), 2.90-2.79 (m, 2H), 2.42 (s, 3H);  $^{13}\text{C}$  NMR (75 MHz,  $\text{CDCl}_3$ ):  $\delta$  143.3, 138.7, 137.2, 133.3, 129.8, 128.9, 128.6, 127.2, 126.6, 119.1, 51.1, 48.9, 35.5, 21.6; ESIHRMS  $m/z$  calcd for  $\text{C}_{18}\text{H}_{22}\text{NO}_2\text{S}$   $[\text{M}+\text{H}]^+$  316.1366, found 316.1368.

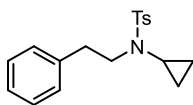

13m

**N-Cyclopropyl-N-(2-phenylethyl)4-methylbenzenesulfonamide 13m.** Prepared according to general procedure I starting from 640  $\mu\text{mol}$  of the corresponding ynamide. Yield: 50% (100 mg, 317  $\mu\text{mol}$ ). Solvent system for flash column chromatography: petroleum ether/EtOAc: 95/5; Yellow oil;  $^1\text{H}$  NMR (400 MHz,  $\text{CDCl}_3$ ):  $\delta$  7.75 (d,  $J = 8.3$  Hz, 2H), 7.33-7.26 (m, 4H), 7.24-7.16 (m, 3H), 3.42-3.36 (m, 2H), 2.94-2.88 (m, 2H), 2.43 (s, 3H), 2.07 (tt,  $J = 6.7$  and  $3.6$  Hz, 1H), 0.77-0.72 (m, 2H), 0.69-0.63 (m, 2H);  $^{13}\text{C}$  NMR (100 MHz,  $\text{CDCl}_3$ ):  $\delta$  143.5, 139.1, 135.9, 129.7, 129.1, 128.6, 127.8, 126.6, 53.0, 35.7, 30.9, 21.7, 7.6; IR (ATR):  $\nu_{\text{max}}$  2940, 1455, 1337, 1158, 1099, 1028, 961, 867, 822, 756, 713, 698, 653  $\text{cm}^{-1}$ ; ESIHRMS  $m/z$  calcd for  $\text{C}_{18}\text{H}_{22}\text{NO}_2\text{S}$   $[\text{M}+\text{H}]^+$  316.1366, found 316.1370.

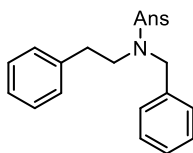

13n

**N-Benzyl-N-phenethyl-o-anisolesulfonamide 13n.** Prepared according to general procedure I starting from 450  $\mu\text{mol}$  of the corresponding ynamide. Yield: 81% (139 mg, 364  $\mu\text{mol}$ ). Solvent system for flash column chromatography: cyclohexane/EtOAc: 60/40; Pale yellow solid;  $^1\text{H}$  NMR (400 MHz,  $\text{CDCl}_3$ ):  $\delta$  8.02 (dd,  $J = 7.9$  and  $1.7$  Hz, 1H), 7.57-7.49 (m, 1H), 7.35-7.24 (m, 5H), 7.23-7.13 (m, 3H), 7.06 (td,  $J = 7.7$  and  $1.0$  Hz, 1H), 6.98 (d,  $J = 8.4$ , 1H), 6.95-6.93 (m, 2H), 4.49 (s, 2H), 3.86 (s, 3H), 3.43-3.34 (m, 2H), 2.66-2.58 (m, 2H);  $^{13}\text{C}$  NMR (100 MHz,  $\text{CDCl}_3$ ):  $\delta$  156.8, 138.8, 137.1, 134.5, 131.5, 129.0, 128.8, 128.7, 128.5, 128.5, 127.8, 126.5, 120.5, 112.2, 56.0, 52.2, 49.0, 35.1; ESIHRMS  $m/z$  calcd for  $\text{C}_{22}\text{H}_{24}\text{NO}_3\text{S}$   $[\text{M}+\text{H}]^+$  382.1471, found 382.1473.

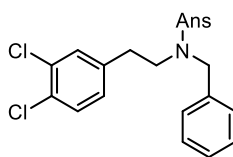

13o

**N-Benzyl-N-(3,4-dichlorophenethyl)-2-methoxybenzenesulfonamide 13o.** Prepared according to general procedure I starting from 500  $\mu\text{mol}$  of the corresponding ynamide. Yield: 65% (146 mg, 325  $\mu\text{mol}$ ). Solvent system for flash column chromatography: petroleum ether/EtOAc: 80/20; White solid;  $^1\text{H}$

NMR (400 MHz, CDCl<sub>3</sub>):  $\delta$  7.96 (dd,  $J$  = 8.0 and 1.7 Hz, 1H), 7.53 (ddd,  $J$  = 8.4, 7.5 and 1.7 Hz, 1H), 7.34-7.24 (m, 5H), 7.20 (d,  $J$  = 8.3 Hz, 1H), 7.04 (app. td,  $J$  = 7.5 and 1.0 Hz, 1H), 6.98-6.95 (m, 2H), 6.77 (dd,  $J$  = 8.3 and 2.0 Hz, 1H), 4.46 (s, 2H), 3.87 (s, 3H), 3.38 (t,  $J$  = 7.6 Hz, 2H), 2.58 (t,  $J$  = 7.6 Hz, 2H); <sup>13</sup>C NMR (100 MHz, CDCl<sub>3</sub>):  $\delta$  156.6, 139.0, 136.7, 134.6, 132.2, 131.4, 130.7, 130.4, 130.3, 128.7, 128.5 (2C), 128.2, 127.9, 120.5, 112.3, 56.0, 52.4, 48.6, 34.4; ESIHRMS  $m/z$  calcd for C<sub>22</sub>H<sub>22</sub>Cl<sub>2</sub>NO<sub>3</sub>S [M+H]<sup>+</sup> 450.0692, found 450.0675.

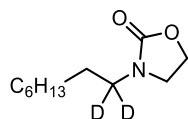13a<sub>dα2</sub>

**3-(Octyl-1,1-d<sub>2</sub>)oxazolidin-2-one 13a<sub>dα2</sub>.** Prepared according to general procedure II. Yield: 86% (52 mg, 257 μmol), α deuteration: 99% (calculated by integration of the residual signal in the <sup>1</sup>H NMR spectra). Solvent system for flash column chromatography: cyclohexane/EtOAc: 60/40; Colorless oil; <sup>1</sup>H NMR (300 MHz, CDCl<sub>3</sub>):  $\delta$  4.34-4.25 (m, 2H), 3.58-3.48 (m, 2H), 1.57-1.45 (m, 2H), 1.37-1.15 (m, 10H), 0.86 (app. t,  $J$  = 6.6 Hz, 3H); <sup>13</sup>C NMR (75 MHz, CDCl<sub>3</sub>):  $\delta$  158.6, 61.7, 44.5, 31.9, 29.3, 29.3, 27.3, 26.7, 22.7, 14.2, (1C-D missing); IR (ATR):  $\nu_{\max}$  2925, 2856, 1746, 1484, 1422, 1269, 1041, 762 cm<sup>-1</sup>; ESIHRMS  $m/z$  calcd for C<sub>11</sub>H<sub>20</sub>D<sub>2</sub>NO<sub>2</sub> [M+H]<sup>+</sup> 202.1771, found 202.1771.

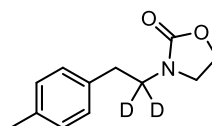13b<sub>dα2</sub>

**3-[2-(p-Tolyl)ethyl-1,1-d<sub>2</sub>]oxazolidin-2-one 13b<sub>dα2</sub>.** Prepared according to general procedure II. Yield: 74% (46 mg, 222 μmol), α deuteration: 99% (calculated by integration of the residual signal in the <sup>1</sup>H NMR spectra). Solvent system for flash column chromatography: petroleum ether/EtOAc: 50/50; White solid; <sup>1</sup>H NMR (300 MHz, CDCl<sub>3</sub>):  $\delta$  7.11 (app. s, 4H), 4.28-4.20 (m, 2H), 3.45-3.36 (m, 2H), 2.83 (s, 2H), 2.32 (s, 3H); <sup>13</sup>C NMR (75 MHz, CDCl<sub>3</sub>):  $\delta$  158.5, 136.3, 135.3, 129.4, 128.6, 61.8, 45.1, 33.5, 21.1, (1C-D missing); IR (ATR):  $\nu_{\max}$  2919, 1733, 1474, 1429, 1268, 1038, 809, 754 cm<sup>-1</sup>; ESIHRMS  $m/z$  calcd for C<sub>12</sub>H<sub>14</sub>D<sub>2</sub>NO<sub>2</sub> [M+H]<sup>+</sup> 208.1301, found 208.1300.

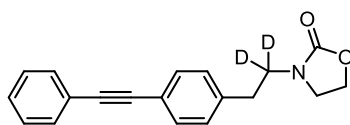13c<sub>dα2</sub>

**3-[2-[4-(Phenylethynyl)phenyl]ethyl-1,1-d<sub>2</sub>]oxazolidin-2-one 13c<sub>dα2</sub>.** Prepared according to general procedure II. Yield: 36% (32 mg, 109 μmol), α deuteration: 97% (calculated by integration of the residual signal in the <sup>1</sup>H NMR spectra). Solvent system for flash column chromatography: cyclohexane/EtOAc: 40/60; Pale yellow solid; <sup>1</sup>H NMR (300 MHz, CDCl<sub>3</sub>):  $\delta$  7.56-7.46 (m, 4H), 7.38-7.31 (m, 3H), 7.22 (d,  $J$  = 8.2 Hz, 2H), 4.29-4.21 (m, 2H), 3.44-3.35 (m, 2H), 2.90 (s, 2H); <sup>13</sup>C NMR (100 MHz, CDCl<sub>3</sub>):  $\delta$  158.5, 138.9, 132.0, 131.7, 128.9, 128.5, 128.4, 123.4, 121.8, 89.6, 89.2, 61.9, 45.3, 34.0, (1C-D missing); IR (ATR):  $\nu_{\max}$  1738, 1473, 1434, 1271, 1037, 830, 760, 695 cm<sup>-1</sup>; ESIHRMS  $m/z$  calcd for C<sub>19</sub>H<sub>16</sub>D<sub>2</sub>NO<sub>2</sub> [M+H]<sup>+</sup> 294.1458, found 294.1464.

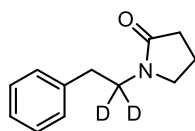**13d<sub>α2</sub>**

**1-(2-Phenylethyl-1,1-d<sub>2</sub>)pyrrolidin-2-one 13d<sub>α2</sub>.** Prepared according to general procedure II. Yield: 71% (41 mg, 214 μmol), α deuteration: 97% (calculated by integration of the residual signal in the <sup>1</sup>H NMR spectra). Solvent system for flash column chromatography: cyclohexane/EtOAc: 30/70; White solid; <sup>1</sup>H NMR (300 MHz, CDCl<sub>3</sub>): δ 7.33-7.18 (m, 5H), 3.24 (t, *J* = 7.0 Hz, 2H), 2.83 (s, 2H), 2.35 (t, *J* = 8.0 Hz, 2H), 1.94 (quint., *J* = 7.6 Hz, 2H); <sup>13</sup>C NMR (75 MHz, CDCl<sub>3</sub>): δ 175.0, 139.0, 128.8, 128.7, 126.6, 47.7, 33.8, 31.2, 18.2, (1C-D missing); ESIHRMS *m/z* calcd for C<sub>12</sub>H<sub>14</sub>D<sub>2</sub>NO [M+H]<sup>+</sup> 192.1352, found 192.1351.

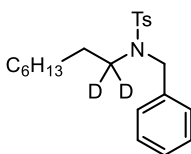**13e<sub>α2</sub>**

**N-Benzyl-4-methyl-N-(octyl-1,1-d<sub>2</sub>)benzenesulfonamide 13e<sub>α2</sub>.** Prepared according to general procedure II. Yield: 74% (83 mg, 221 μmol), α deuteration: 99% (calculated by integration of the residual signal in the <sup>1</sup>H NMR spectra). Solvent system for flash column chromatography: cyclohexane/EtOAc: 90/10; White solid; <sup>1</sup>H NMR (300 MHz, CDCl<sub>3</sub>): δ 7.73 (d, *J* = 8.3 Hz, 2H), 7.35-7.25 (m, 7H), 4.31 (s, 2H), 2.44 (s, 3H), 1.33-1.00 (m, 12H), 0.85 (t, *J* = 7.1 Hz, 3H); <sup>13</sup>C NMR (75 MHz, CDCl<sub>3</sub>): δ 143.2, 137.4, 136.8, 129.8, 128.6, 128.4, 127.8, 127.3, 51.9, 31.8, 29.2, 29.1, 27.8, 26.7, 22.7, 21.6, 14.2, (1C-D missing); IR (ATR): ν<sub>max</sub> 2928, 2856, 1455, 1340, 1159, 1096, 887, 814, 757, 730, 699 cm<sup>-1</sup>; ESIHRMS *m/z* calcd for C<sub>22</sub>H<sub>30</sub>D<sub>2</sub>NO<sub>2</sub>S [M+H]<sup>+</sup> 376.2274, found 376.2280.

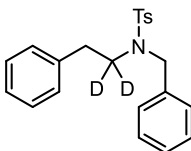**13f<sub>α2</sub>**

**N-Benzyl-4-methyl-N-(2-phenylethyl-1,1-d<sub>2</sub>)benzenesulfonamide 13f<sub>α2</sub>.** Prepared according to general procedure II starting from 250 μmol of the corresponding ynamide. Yield: 60% (55 mg, 150 μmol), α deuteration: 98% (calculated by integration of the residual signal in the <sup>1</sup>H NMR spectra). Solvent system for flash column chromatography: cyclohexane/EtOAc: 90/10; White solid; <sup>1</sup>H NMR (300 MHz, CDCl<sub>3</sub>): δ 7.74 (d, *J* = 8.2 Hz, 2H), 7.38-7.26 (m, 7H), 7.24-7.14 (m, 3H), 6.98-6.91 (m, 2H), 4.33 (s, 2H), 2.61 (s, 2H), 2.44 (s, 3H); <sup>13</sup>C NMR (75 MHz, CDCl<sub>3</sub>): δ 143.4, 138.6, 137.2, 136.4, 129.9, 128.8 (2C), 128.6 (2C), 128.0, 127.3, 126.5, 52.3, 35.2, 21.7, (1C-D missing); IR (ATR): ν<sub>max</sub> 2361, 1455, 1338, 1158, 1106, 1068, 820, 774, 752, 729, 702, 658 cm<sup>-1</sup>; ESIHRMS *m/z* calcd for C<sub>22</sub>H<sub>22</sub>D<sub>2</sub>NO<sub>2</sub>S [M+H]<sup>+</sup> 368.1648, found 368.1655.

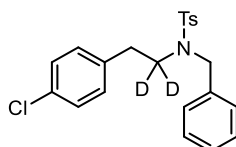**13g<sub>d $\alpha$ 2</sub>**

**N-Benzyl-N-[2-(4-chlorophenyl)ethyl]-1,1-d<sub>2</sub>-4-methylbenzenesulfonamide 13g<sub>d $\alpha$ 2</sub>.** Prepared according to general procedure II. Yield: 78% (94 mg, 234  $\mu$ mol),  $\alpha$  deuteration: 98% (calculated by integration of the residual signal in the <sup>1</sup>H NMR spectra). Solvent system for flash column chromatography: cyclohexane/EtOAc: 90/10; White solid; <sup>1</sup>H NMR (300 MHz, CDCl<sub>3</sub>):  $\delta$  7.71 (d, *J* = 8.3 Hz, 2H), 7.35-7.22 (m, 7H), 7.15 (d, *J* = 8.4 Hz, 2H), 6.85 (d, *J* = 8.3 Hz, 2H), 4.31 (s, 2H), 2.58 (s, 2H), 2.44 (s, 3H); <sup>13</sup>C NMR (75 MHz, CDCl<sub>3</sub>):  $\delta$  143.5, 137.0, 136.9, 136.2, 132.3, 130.1, 129.9, 128.8, 128.7, 128.6, 128.1, 127.3, 52.5, 34.6, 21.7, (1C-D missing); IR (ATR):  $\nu_{\text{max}}$  2937, 1491, 1332, 1159, 1108, 1089, 913, 840, 818, 742, 711, 660 cm<sup>-1</sup>; ESIHRMS *m/z* calcd for C<sub>22</sub>H<sub>21</sub>D<sub>2</sub>ClNO<sub>2</sub>S [M+H]<sup>+</sup> 402.1258, found 402.1266.

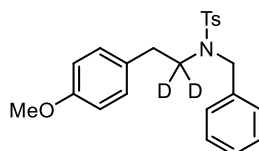**13h<sub>d $\alpha$ 2</sub>**

**N-Benzyl-N-[2-(4-methoxyphenyl)ethyl]-1,1-d<sub>2</sub>-4-methylbenzenesulfonamide 13h<sub>d $\alpha$ 2</sub>.** Prepared according to general procedure II starting from 220  $\mu$ mol of the corresponding ynamide. Yield: 69% (60 mg, 151  $\mu$ mol),  $\alpha$  deuteration: 98% (calculated by integration of the residual signal in the <sup>1</sup>H NMR spectra). Solvent system for flash column chromatography: cyclohexane/EtOAc: 90/10; White solid; <sup>1</sup>H NMR (300 MHz, CDCl<sub>3</sub>):  $\delta$  7.74 (d, *J* = 8.3 Hz, 2H), 7.36-7.26 (m, 7H), 6.86 (d, *J* = 8.7 Hz, 2H), 6.74 (d, *J* = 8.7 Hz, 2H), 4.33 (s, 2H), 3.75 (s, 3H), 2.55 (s, 2H), 2.44 (s, 3H); <sup>13</sup>C NMR (75 MHz, CDCl<sub>3</sub>):  $\delta$  158.3, 143.4, 137.2, 136.4, 130.6, 129.9, 129.7, 128.7, 128.6, 128.0, 127.3, 114.0, 55.4, 52.3, 34.2, 21.6, (1C-D missing); IR (ATR):  $\nu_{\text{max}}$  2933, 1512, 1333, 1249, 1159, 1035, 816, 746, 723, 701 cm<sup>-1</sup>; ESIHRMS *m/z* calcd for C<sub>23</sub>H<sub>24</sub>D<sub>2</sub>NO<sub>3</sub>S [M+H]<sup>+</sup> 398.1753, found 398.1722.

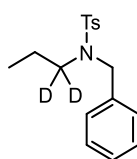**13i<sub>d $\alpha$ 2</sub>**

**N-Benzyl-N-(propyl-1,1-d<sub>2</sub>)benzenesulfonamide 13i<sub>d $\alpha$ 2</sub>.** Prepared according to general procedure II starting from 140  $\mu$ mol of the corresponding ynamide. Yield: 80% (34 mg, 112  $\mu$ mol),  $\alpha$  deuteration: 99% (calculated by integration of the residual signal in the <sup>1</sup>H NMR spectra). Solvent system for flash column chromatography: cyclohexane/EtOAc: 90/10; Colorless oil; <sup>1</sup>H NMR (300 MHz, CDCl<sub>3</sub>):  $\delta$  7.73 (d, *J* = 8.1 Hz, 2H), 7.37-7.24 (m, 7H), 4.32 (s, 2H), 2.44 (s, 3H), 1.33 (q, *J* = 7.4 Hz, 2H), 0.70 (t, *J* = 7.4 Hz, 3H); <sup>13</sup>C NMR (100 MHz, CDCl<sub>3</sub>):  $\delta$  143.2, 137.4, 136.8, 129.8, 128.6, 128.3, 127.8, 127.3, 51.9, 21.6, 21.3, 11.2, (1C-D missing); IR (ATR):  $\nu_{\text{max}}$  2928, 1455, 1320, 1154, 814, 762, 727, 694, 662 cm<sup>-1</sup>; ESIHRMS *m/z* calcd for C<sub>17</sub>H<sub>20</sub>D<sub>2</sub>NO<sub>2</sub>S [M+H]<sup>+</sup> 306.1491, found 306.1498.

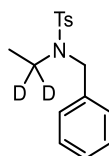**13j<sub>da2</sub>**

**N-Benzyl-N-(ethyl-1,1-*d*<sub>2</sub>)-4-methylbenzenesulfonamide 13j<sub>da2</sub>.** Prepared according to general procedure II starting from 350 μmol of the corresponding ynamide. Yield: 32% (32 mg, 111 μmol), α deuteration: >99% (calculated by integration of the residual signal in the <sup>1</sup>H NMR spectra). Solvent system for flash column chromatography: petroleum ether/EtOAc: 95/5; Yellow oil; <sup>1</sup>H NMR (400 MHz, CDCl<sub>3</sub>): δ 7.74 (d, *J* = 8.3 Hz, 2H), 7.35-7.27 (m, 7H), 4.33 (s, 2H), 2.44 (s, 3H), 0.91 (s, 3H); <sup>13</sup>C NMR (100 MHz, CDCl<sub>3</sub>): δ 143.3, 137.6, 136.7, 129.8, 128.7, 128.4, 127.8, 127.3, 51.1, 21.7, 13.2, (1C-D missing); IR (ATR): ν<sub>max</sub> 2977, 2936, 1598, 1495, 1455, 1336, 1157, 1093, 942, 855, 812, 756, 719, 673, 646 cm<sup>-1</sup>; ESIHRMS *m/z* calcd for C<sub>16</sub>H<sub>18</sub>D<sub>2</sub>NO<sub>2</sub>S [M+H]<sup>+</sup> 292.1335, found 292.1344.

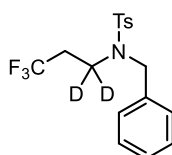**13k<sub>da2</sub>**

**N-Benzyl-N-(3,3,3-trifluoropropyl-1,1-*d*<sub>2</sub>)-4-methylbenzenesulfonamide 13k<sub>da2</sub>.** Prepared according to general procedure II starting from 250 μmol of the corresponding ynamide. Yield: 36% (32 mg, 89 μmol), α deuteration: 99% (calculated by integration of the residual signal in the <sup>1</sup>H NMR spectra). Solvent system for flash column chromatography: petroleum ether/EtOAc: 95/5; Pale yellow solid; Mp: 77 °C; <sup>1</sup>H NMR (400 MHz, CDCl<sub>3</sub>): δ 7.74 (d, *J* = 8.3 Hz, 2H), 7.38-7.31 (m, 5H), 7.29-7.26 (m, 2H), 4.30 (s, 2H), 2.46 (s, 3H), 2.15 (q, *J* = 10.7 Hz, 2H); <sup>13</sup>C NMR (100 MHz, CDCl<sub>3</sub>): δ 144.0, 136.1, 135.7, 130.1, 129.0, 128.6, 128.5, 127.4, 125.7 (q, *J*<sub>C-F</sub> = 277.0 Hz), 53.1, 33.7 (q, *J*<sub>C-F</sub> = 28.0 Hz), 21.7, (1C-D missing); <sup>19</sup>F (376 MHz, CDCl<sub>3</sub>): δ -66.4 (t, *J* = 10.7 Hz); IR (ATR): ν<sub>max</sub> 2930, 1367, 1327, 1276, 1259, 1190, 1154, 1135, 981, 867, 815, 729, 697, 665 cm<sup>-1</sup>; ESIHRMS *m/z* calcd for C<sub>17</sub>H<sub>17</sub>D<sub>2</sub>F<sub>3</sub>NO<sub>2</sub>S [M+H]<sup>+</sup> 360.1209, found 360.1211.

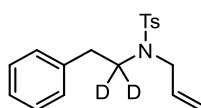**13l<sub>da2</sub>**

**N-Allyl-N-(2-phenylethyl-1,1-*d*<sub>2</sub>)benzenesulfonamide 13l<sub>da2</sub>.** Prepared according to general procedure II. Yield: 80% (76 mg, 239 μmol), α deuteration: 96% (calculated by integration of the residual signal in the <sup>1</sup>H NMR spectra). Solvent system for flash column chromatography: cyclohexane/EtOAc: 90/10; White solid; <sup>1</sup>H NMR (400 MHz, CDCl<sub>3</sub>): δ 7.69 (d, *J* = 8.2 Hz, 2H), 7.32-7.25 (m, 4H), 7.24-7.18 (m, 1H), 7.14 (d, *J* = 7.7 Hz, 2H), 5.63 (ddt, *J* = 16.7, 10.1 and 6.6 Hz, 1H), 5.22-5.13 (m, 2H), 3.80 (d, *J* = 6.5 Hz, 2H), 2.83 (s, 2H), 2.42 (s, 3H); <sup>13</sup>C NMR (100 MHz, CDCl<sub>3</sub>): δ 143.3, 138.7, 137.2, 133.3, 129.8, 128.9, 128.6, 127.2, 126.6, 119.1, 51.0, 48.7-47.9 (m<sub>C-D</sub>), 35.3, 21.6; IR (ATR): ν<sub>max</sub> 3028, 1339, 1305, 1160, 1093, 933, 861, 746, 701, 667 cm<sup>-1</sup>; ESIHRMS *m/z* calcd for C<sub>18</sub>H<sub>20</sub>D<sub>2</sub>NO<sub>2</sub>S [M+H]<sup>+</sup> 318.1491, found 318.1496.

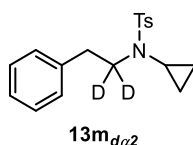

**N-Cyclopropyl-N-(2-phenylethyl-1,1-d<sub>2</sub>)4-methylbenzenesulfonamide 13m<sub>d $\alpha$ 2</sub>.** Prepared according to general procedure II starting from 640  $\mu$ mol of the corresponding ynamide. Yield: 46% (93 mg, 292  $\mu$ mol),  $\alpha$  deuteration: >99% (calculated by integration of the residual signal in the <sup>1</sup>H NMR spectra). Solvent system for flash column chromatography: petroleum ether/EtOAc: 95/5; Colorless oil; <sup>1</sup>H NMR (400 MHz, CDCl<sub>3</sub>):  $\delta$  7.75 (d, *J* = 8.3 Hz, 2H), 7.33-7.26 (m, 4H), 7.24-7.16 (m, 3H), 2.90 (s, 2H), 2.43 (s, 3H), 2.07 (tt, *J* = 7.0 and 3.7 Hz, 1H), 0.77-0.71 (m, 2H), 0.69-0.63 (m, 2H); <sup>13</sup>C NMR (100 MHz, CDCl<sub>3</sub>):  $\delta$  143.5, 139.1, 135.9, 129.7, 129.0, 128.6, 127.8, 126.6, 35.5, 30.8, 21.7, 7.6, (1C-D missing); IR (ATR):  $\nu_{\text{max}}$  3028, 1599, 1496, 1455, 1370, 1338, 1161, 1093, 1027, 818, 747, 711, 689, 649 cm<sup>-1</sup>; ESIHRMS *m/z* calcd for C<sub>18</sub>H<sub>20</sub>D<sub>2</sub>NO<sub>2</sub>S [M+H]<sup>+</sup> 318.1491, found 318.1502.

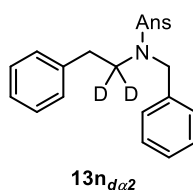

**N-Benzyl-2-methoxy-N-(2-phenylethyl-1,1-d<sub>2</sub>)benzenesulfonamide 13n<sub>d $\alpha$ 2</sub>.** Prepared according to general procedure II starting from 800  $\mu$ mol of the corresponding ynamide. Yield: 67% (206 mg, 537  $\mu$ mol),  $\alpha$  deuteration: >99% (calculated by integration of the residual signal in the <sup>1</sup>H NMR spectra). Solvent system for flash column chromatography: petroleum ether/EtOAc: 80/20; White solid; <sup>1</sup>H NMR (400 MHz, CDCl<sub>3</sub>):  $\delta$  8.02 (dd, *J* = 8.0 and 1.8 Hz, 1H), 7.53 (ddd, *J* = 8.4, 7.5 and 1.8 Hz, 1H), 7.35-7.24 (m, 5H), 7.22-7.12 (m, 3H), 7.06 (app. td, *J* = 7.8 and 1.0 Hz, 1H), 6.99 (d, *J* = 8.3 Hz, 1H), 6.96-6.93 (m, 2H), 4.49 (s, 2H), 3.86 (s, 3H), 2.62 (s, 2H); <sup>13</sup>C NMR (100 MHz, CDCl<sub>3</sub>):  $\delta$  156.8, 138.8, 137.1, 134.4, 131.4, 128.9, 128.8, 128.7, 128.5, 128.5, 127.8, 126.4, 120.5, 112.3, 56.0, 52.1, 48.5-48.1 (m<sub>C-D</sub>), 35.0; IR (ATR):  $\nu_{\text{max}}$  2920, 2851, 2256, 1590, 1466, 1331, 1280, 1154, 1134, 1072, 1020, 910, 866, 803, 755, 734, 700 cm<sup>-1</sup>; ESIHRMS *m/z* calcd for C<sub>22</sub>H<sub>22</sub>D<sub>2</sub>NO<sub>3</sub>S [M+H]<sup>+</sup> 384.1597, found 384.1562.

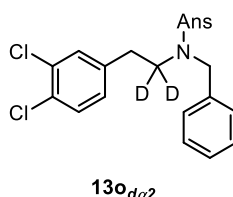

**N-Benzyl-N-[2-(3,4-dichlorophenyl)ethyl-1,1-d<sub>2</sub>]-2-methoxybenzenesulfonamide 13o<sub>d $\alpha$ 2</sub>.** Prepared according to general procedure II starting from 800  $\mu$ mol of the corresponding ynamide. Yield: 66% (238 mg, 526  $\mu$ mol),  $\alpha$  deuteration: >99% (calculated by integration of the residual signal in the <sup>1</sup>H NMR spectra). Solvent system for flash column chromatography: petroleum ether/EtOAc: 80/20; White solid; Mp: 96 °C; <sup>1</sup>H NMR (400 MHz, CDCl<sub>3</sub>):  $\delta$  7.94 (dd, *J* = 7.9 and 1.8 Hz, 1H), 7.50 (ddd, *J* = 8.3, 7.5 and 1.8 Hz, 1H), 7.31-7.22 (m, 5H), 7.18 (d, *J* = 8.3 Hz, 1H), 7.02 (app. td, *J* = 7.6 and 1.0 Hz, 1H), 6.96-6.93 (m, 2H), 6.75 (dd, *J* = 8.3 and 2.0 Hz, 1H), 4.44 (s, 2H), 3.84 (s, 3H), 2.55 (s, 2H); <sup>13</sup>C NMR (100 MHz, CDCl<sub>3</sub>):  $\delta$  156.6, 139.0, 136.7, 134.5, 132.2, 131.3, 130.7, 130.4, 130.3, 128.7, 128.5 (2C), 128.2, 127.9, 120.5, 112.3, 60.0, 52.3, 48.3-47.8 (m<sub>C-D</sub>), 34.2; IR (ATR):  $\nu_{\text{max}}$  3376, 2945, 2841, 2361, 2333, 1590, 1480, 1332, 1280, 1155, 1133, 1072, 1020, 867, 804, 757, 700 cm<sup>-1</sup>; ESIHRMS *m/z* calcd for C<sub>22</sub>H<sub>20</sub>D<sub>2</sub>Cl<sub>2</sub>NO<sub>3</sub>S [M+H]<sup>+</sup> 452.0817, found 452.0822.

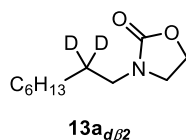

**3-(Octyl-2,2-d<sub>2</sub>)oxazolidin-2-one 13a<sub>dβ2</sub>.** Prepared according to general procedure III starting from 1.0 mmol of the corresponding ynamide and using freshly prepared trifluoromethanesulfonic acid-*d*. Yield: 73% (146 mg, 726 μmol), β deuteration: 88% (calculated by integration of the residual signal in the <sup>1</sup>H NMR spectra). Solvent system for flash column chromatography: petroleum ether/EtOAc: 70/30; Pale yellow oil; <sup>1</sup>H NMR (400 MHz, CDCl<sub>3</sub>): δ 4.34-4.28 (m, 2H), 3.57-3.51 (m, 2H), 3.23 (s, 2H), 1.34-1.22 (m, 10H), 0.90-0.85 (m, 3H); <sup>13</sup>C NMR (100 MHz, CDCl<sub>3</sub>): δ 158.6, 61.7, 44.7, 44.3, 31.9, 29.3, 29.3, 26.6, 22.8, 14.2, (1C-D missing); IR (ATR): ν<sub>max</sub> 2923, 2855, 1747, 1485, 1427, 1262, 1043, 763 cm<sup>-1</sup>; ESIHRMS *m/z* calcd for C<sub>11</sub>H<sub>20</sub>D<sub>2</sub>NO<sub>2</sub> [M+H]<sup>+</sup> 202.1771, found 202.1768.

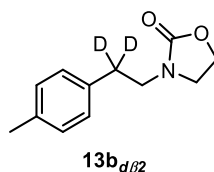

**3-[2-(*p*-Tolyl)ethyl-2,2-d<sub>2</sub>]oxazolidin-2-one 13b<sub>dβ2</sub>.** Prepared according to general procedure III starting from 853 μmol of the corresponding ynamide and using freshly prepared trifluoromethanesulfonic acid-*d*. Yield: 71% (126 mg, 608 μmol), β deuteration: 91% (calculated by integration of the residual signal in the <sup>1</sup>H NMR spectra). Solvent system for flash column chromatography: petroleum ether/EtOAc: 60/40; White solid; Mp: 77 °C; <sup>1</sup>H NMR (400 MHz, CDCl<sub>3</sub>): δ 7.11 (app. s, 4H), 4.26-4.21 (m, 2H), 3.49 (s, 2H), 3.43-3.38 (m, 2H), 2.32 (s, 3H); <sup>13</sup>C NMR (100 MHz, CDCl<sub>3</sub>): δ 158.5, 136.3, 135.3, 129.5, 128.6, 61.8, 45.7, 45.2, 34.0-32.5 (m<sub>C-D</sub>), 21.2; IR (ATR): ν<sub>max</sub> 1734, 1474, 1434, 1261, 1038, 754 cm<sup>-1</sup>; ESIHRMS *m/z* calcd for C<sub>12</sub>H<sub>14</sub>D<sub>2</sub>NO<sub>2</sub> [M+H]<sup>+</sup> 208.1301, found 208.1300.

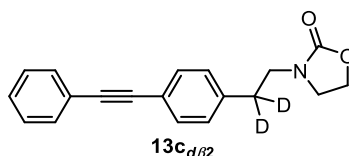

**3-[2-[4-(Phenylethynyl)phenyl]ethyl-2,2-d<sub>2</sub>]oxazolidin-2-one 13c<sub>dβ2</sub>.** Prepared according to general procedure III. Yield: 43% (38 mg, 130 μmol), β deuteration: 82% (calculated by integration of the residual signal in the <sup>1</sup>H NMR spectra). Solvent system for flash column chromatography: cyclohexane/EtOAc: 40/60; Pale yellow solid; <sup>1</sup>H NMR (300 MHz, CDCl<sub>3</sub>): δ 7.58-7.43 (m, 4H), 7.39-7.30 (m, 3H); 7.22 (d, *J* = 8.1 Hz, 2H), 4.31-4.21 (m, 2H), 3.52 (obs. s, 2H), 3.44-3.36 (m, 2H); <sup>13</sup>C NMR (100 MHz, CDCl<sub>3</sub>): δ 158.8, 138.7, 132.0, 131.7, 128.8, 128.5, 128.4, 123.3, 121.8, 89.6, 89.2, 62.1, 45.4, 45.4, 34.3-33.0 (m<sub>C-D</sub>), IR (ATR): ν<sub>max</sub> 2919, 1739, 1474, 1437, 1265, 1039, 760, 695 cm<sup>-1</sup>; ESIHRMS *m/z* calcd for C<sub>19</sub>H<sub>16</sub>D<sub>2</sub>NO<sub>2</sub> [M+H]<sup>+</sup> 294.1458, found 294.1463.

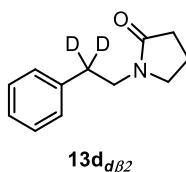

**1-(2-Phenylethyl-2,2-d<sub>2</sub>)pyrrolidin-2-one 13d<sub>dβ2</sub>.** Prepared according to general procedure III starting from 540 μmol of the corresponding ynamide and using freshly prepared trifluoromethanesulfonic acid-*d*.

Yield: 54% (56 mg, 293  $\mu\text{mol}$ ),  $\beta$  deuteration: 84% (calculated by integration of the residual signal in the  $^1\text{H}$  NMR spectra). Solvent system for flash column chromatography: cyclohexane/EtOAc: 30/70; White solid;  $^1\text{H}$  NMR (400 MHz,  $\text{CDCl}_3$ ):  $\delta$  7.28-7.23 (m, 2H), 7.15-7.20 (m, 3H) 3.48 (obs. s, 2H), 3.21 (t,  $J = 7.2$  Hz, 2H), 2.31 (t,  $J = 8.4$  Hz, 2H), 1.90 (quint.,  $J = 7.6$  Hz, 2H);  $^{13}\text{C}$  NMR (100 MHz,  $\text{CDCl}_3$ ):  $\delta$  175.0, 138.9, 128.8, 128.6, 126.6, 47.8, 44.1, 34.1-33.2 (m<sub>C-D</sub>), 31.2, 18.2; IR (ATR):  $\nu_{\text{max}}$  2921, 1672, 1495, 1427, 1286, 741, 702, 622  $\text{cm}^{-1}$ ; ESIHRMS  $m/z$  calcd for  $\text{C}_{12}\text{H}_{14}\text{D}_2\text{NO}$  [ $\text{M}+\text{H}$ ] $^+$  192.1352, found 192.1349.

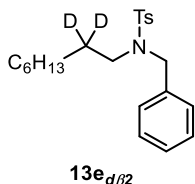

**N-Benzyl-4-methyl-N-(octyl-2,2-d<sub>2</sub>)benzenesulfonamide 13e<sub>dβ2</sub>.** Prepared according to general procedure III starting from 270  $\mu\text{mol}$  of the corresponding ynamide and using freshly prepared trifluoromethanesulfonic acid-*d*. Yield: 53% (54 mg, 144  $\mu\text{mol}$ ),  $\beta$  deuteration: 83% (calculated by integration of deuterium signal in  $^2\text{H}$  NMR spectra with  $\text{C}_2\text{D}_2\text{Cl}_4$  as a reference). Solvent system for flash column chromatography: cyclohexane/EtOAc: 90/10; White solid;  $^1\text{H}$  NMR (400 MHz,  $\text{CDCl}_3$ ):  $\delta$  7.73 (d,  $J = 8.4$  Hz, 2H), 7.33-7.25 (m, 7H), 4.31 (s, 2H), 3.06 (s, 2H), 2.44 (s, 3H), 1.33-1.05 (m, 10H), 0.86 (t,  $J = 7.2$  Hz, 3H);  $^{13}\text{C}$  NMR (100 MHz,  $\text{CDCl}_3$ ):  $\delta$  143.2, 137.4, 136.8, 129.8, 128.6, 128.4, 127.8, 127.3, 52.0, 48.0, 31.8, 29.2, 29.1, 27.4-27.0 (m<sub>C-D</sub>), 26.5, 22.7, 21.7, 14.2;  $^2\text{H}$  NMR (92 MHz,  $\text{CHCl}_3$ ):  $\delta$  1.33 (s, 2D); IR (ATR):  $\nu_{\text{max}}$  2924, 2856, 1455, 1336, 1159, 1092, 949, 815, 756, 699  $\text{cm}^{-1}$ ; ESIHRMS  $m/z$  calcd for  $\text{C}_{22}\text{H}_{30}\text{D}_2\text{NO}_2\text{S}$  [ $\text{M}+\text{H}$ ] $^+$  376.2274, found 376.2278.

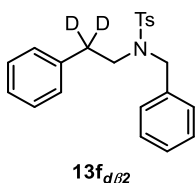

**N-Benzyl-4-methyl-N-(2-phenylethyl-2,2-d<sub>2</sub>)benzenesulfonamide 13f<sub>dβ2</sub>.** Prepared according to general procedure III. Yield: 72% (79 mg, 215  $\mu\text{mol}$ ),  $\beta$  deuteration: 87% (calculated by integration of the residual signal in the  $^1\text{H}$  NMR spectra). Solvent system for flash column chromatography: cyclohexane/EtOAc: 90/10; White solid;  $^1\text{H}$  NMR (400 MHz,  $\text{CDCl}_3$ ):  $\delta$  7.75 (d,  $J = 8.2$  Hz, 2H), 7.38-7.28 (m, 7H), 7.25-7.14 (m, 3H), 6.96 (d,  $J = 8.0$  Hz, 2H), 4.35 (s, 2H), 3.28 (s, 2H), 2.45 (s, 3H);  $^{13}\text{C}$  NMR (100 MHz,  $\text{CDCl}_3$ ):  $\delta$  143.4, 138.5, 137.1, 136.4, 129.9, 128.7 (2C), 128.6 (2C), 128.0, 127.3, 126.5, 52.4, 49.5, 35.0-34.5 (m<sub>C-D</sub>), 21.6; IR (ATR):  $\nu_{\text{max}}$  3031, 1495, 1451, 1334, 1157, 817, 804, 747, 701, 655  $\text{cm}^{-1}$ ; ESIHRMS  $m/z$  calcd for  $\text{C}_{22}\text{H}_{22}\text{D}_2\text{NO}_2\text{S}$  [ $\text{M}+\text{H}$ ] $^+$  368.1648, found 368.1651.

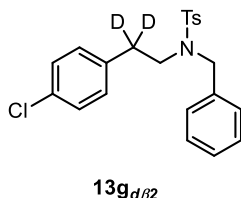

**N-Benzyl-N-(2-(4-chlorophenyl)ethyl-2,2-d<sub>2</sub>)-4-methylbenzenesulfonamide 13g<sub>dβ2</sub>.** Prepared according to general procedure III. Yield: 75% (91 mg, 226  $\mu\text{mol}$ ),  $\beta$  deuteration: 93% (calculated by integration of the residual signal in the  $^1\text{H}$  NMR spectra). Solvent system for flash column chromatography: cyclohexane/EtOAc: 90/10; White solid;  $^1\text{H}$  NMR (400 MHz,  $\text{CDCl}_3$ ):  $\delta$  7.71 (d,  $J = 8.2$  Hz, 2H), 7.35-7.29 (m, 5H), 7.28-7.23 (m, 2H), 7.15 (app. dt,  $J = 8.3$  and 2.0 Hz, 2H), 6.85 (app. dt,  $J = 8.4$  and 2.0 Hz, 2H), 4.31 (s, 2H), 3.22 (s, 2H), 2.44 (s, 3H);  $^{13}\text{C}$  NMR (100 MHz,  $\text{CDCl}_3$ ):  $\delta$  143.5, 137.0,



136.9, 136.2, 132.3, 130.1, 129.9, 128.8, 128.7, 128.6, 128.1, 127.3, 52.6, 49.4, 34.8-33.9 (m<sub>C-D</sub>), 21.7; IR (ATR):  $\nu_{\text{max}}$  2951, 1491, 1332, 1159, 1108, 1089, 914, 819, 778, 742, 710, 661 cm<sup>-1</sup>; ESIHRMS  $m/z$  calcd for C<sub>22</sub>H<sub>21</sub>D<sub>2</sub>CINO<sub>2</sub>S [M+H]<sup>+</sup> 402.1258, found 402.1210.

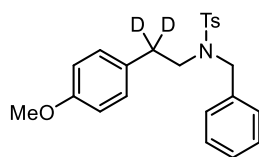13h<sub>dβ2</sub>

**N-Benzyl-N-(2-(4-methoxyphenyl)ethyl)-2,2-d<sub>2</sub>-4-methylbenzenesulfonamide 13h<sub>dβ2</sub>.** Prepared according to general procedure III. Yield: 65% (78 mg, 196 μmol), β deuteration: 85% (calculated by integration of the residual signal in the <sup>1</sup>H NMR spectra). Solvent system for flash column chromatography: cyclohexane/EtOAc: 90/10; White solid; <sup>1</sup>H NMR (300 MHz, CDCl<sub>3</sub>): δ 7.74 (d, *J* = 8.3 Hz, 2H), 7.37-7.26 (m, 7H), 6.90-6.82 (m, 2H), 6.74 (d, *J* = 8.9 Hz, 1H), 4.33 (s, 2H), 3.76 (s, 3H), 3.23 (s, 2H), 2.44 (s, 3H); <sup>13</sup>C NMR (75 MHz, CDCl<sub>3</sub>): δ 158.3, 143.4, 137.2, 136.4, 130.5, 129.8, 129.7, 128.7, 128.6, 128.0, 127.3, 114.0, 55.3, 52.4, 49.7, 34.6-33.3 (m<sub>C-D</sub>), 21.6; IR (ATR):  $\nu_{\text{max}}$  2955, 1609, 1495, 1332, 1245, 1157, 1032, 950, 783, 745, 725, 658 cm<sup>-1</sup>; ESIHRMS  $m/z$  calcd for C<sub>23</sub>H<sub>24</sub>D<sub>2</sub>NO<sub>3</sub>S [M+H]<sup>+</sup> 398.1753, found 398.1737.

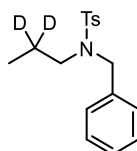13i<sub>dβ2</sub>

**N-Benzyl-N-(propyl-2,2-d<sub>2</sub>)benzenesulfonamide 13i<sub>dβ2</sub>.** Prepared according to general procedure III starting from 140 μmol of the corresponding ynamide. Yield: 72% (31 mg, 101 μmol), β deuteration: 87% (calculated by integration of the residual signal in the <sup>1</sup>H NMR spectra). Solvent system for flash column chromatography: cyclohexane/EtOAc: 95/5; Colorless oil; <sup>1</sup>H NMR (300 MHz, CDCl<sub>3</sub>): δ 7.73 (d, *J* = 8.2 Hz, 2H), 7.37-7.23 (m, 7H), 4.31 (s, 2H), 3.03 (s, 2H), 2.44 (s, 3H), 0.68 (s, 3H); <sup>13</sup>C NMR (75 MHz, CDCl<sub>3</sub>): δ 143.3, 137.3, 136.8, 129.8, 128.6, 128.3, 127.8, 127.3, 52.0, 49.8, 21.7, 11.1, (1C-D missing); IR (ATR):  $\nu_{\text{max}}$  2927, 1494, 1454, 1322, 1310, 1152, 1122, 1094, 947, 814, 728, 657 cm<sup>-1</sup>; ESIHRMS  $m/z$  calcd for C<sub>17</sub>H<sub>20</sub>D<sub>2</sub>NO<sub>2</sub>S [M+H]<sup>+</sup> 306.1491, found 306.1496.

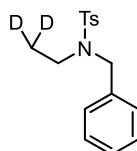13j<sub>dβ2</sub>

**N-Benzyl-N-(ethyl-2,2-d<sub>2</sub>)-4-methylbenzenesulfonamide 13j<sub>dβ2</sub>.** Prepared according to general procedure III starting from 350 μmol of the corresponding ynamide. Yield: 46% (47 mg, 161 μmol), β deuteration: 85% (calculated by integration of the residual signal in the <sup>1</sup>H NMR spectra). Solvent system for flash column chromatography: petroleum ether/EtOAc: 95/5; Yellow oil; <sup>1</sup>H NMR (400 MHz, CDCl<sub>3</sub>): δ 7.74 (d, *J* = 8.3 Hz, 2H), 7.35-7.27 (m, 7H), 4.33 (s, 2H), 3.17 (obs. d, *J* = 6.8 Hz, 2H), 2.44 (s, 3H), 0.93-0.86 (m, 1.30H: 1.00H from the desired deuterated product and 0.30H from the residual non deuterated molecule); <sup>13</sup>C NMR (100 MHz, CDCl<sub>3</sub>): δ 143.3, 137.5, 136.7, 129.8, 128.7, 128.4, 127.8,

\* 1H missing due to partial deuteration.

127.3, 51.2, 42.3, 21.7, 13.4-12.6 (m<sub>C-D</sub>); IR (ATR):  $\nu_{\max}$  2938, 1599, 1495, 1455, 1333, 1158, 1089, 944, 811, 753, 711, 692, 650 cm<sup>-1</sup>; ESIHRMS  $m/z$  calcd for C<sub>16</sub>H<sub>18</sub>D<sub>2</sub>NO<sub>2</sub>S [M+H]<sup>+</sup> 292.1335, found 292.1341.

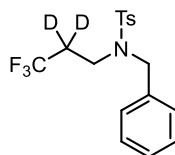13k<sub>dβ2</sub>

**N-Benzyl-N-(3,3,3-trifluoropropyl-2,2-d<sub>2</sub>)-4-methylbenzenesulfonamide 13k<sub>dβ2</sub>.** Prepared according to general procedure III starting from 250 μmol of the corresponding ynamide. Yield: 48% (43 mg, 120 μmol), β deuteration: 90% (calculated by integration of the residual signal in the <sup>1</sup>H NMR spectra). Solvent system for flash column chromatography: petroleum ether/EtOAc: 95/5; Pale yellow solid; Mp: 79 °C; <sup>1</sup>H NMR (400 MHz, CDCl<sub>3</sub>): δ 7.74 (d, *J* = 8.3 Hz, 2H), 7.38-7.32 (m, 5H), 7.30-7.26 (m, 2H), 4.30 (s, 2H), 3.25 (obs. s, 2H), 2.46 (s, 3H); <sup>13</sup>C NMR (100 MHz, CDCl<sub>3</sub>): δ 144.0, 136.1, 135.7, 130.1, 129.0, 128.6, 128.5, 127.4, 125.6 (q, *J*<sub>C-F</sub> = 276.8 Hz), 53.2, 41.5 (q, *J*<sub>C-F</sub> = 4.2 Hz), 21.7, (1C-D missing); <sup>19</sup>F (376 MHz, CDCl<sub>3</sub>): δ -66.6; IR (ATR):  $\nu_{\max}$  2929, 1456, 1325, 1310, 1168, 1153, 1059, 937, 815, 733, 697, 663 cm<sup>-1</sup>; ESIHRMS  $m/z$  calcd for C<sub>17</sub>H<sub>17</sub>D<sub>2</sub>F<sub>3</sub>NO<sub>2</sub>S [M+H]<sup>+</sup> 360.1209, found 360.1213.

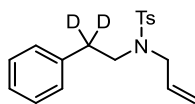13l<sub>dβ2</sub>

**N-Allyl-N-(2-phenylethyl-2,2-d<sub>2</sub>)benzenesulfonamide 13l<sub>dβ2</sub>.** Prepared according to general procedure III. Yield: 72% (69 mg, 217 μmol), β deuteration: 91% (calculated by integration of the residual signal in the <sup>1</sup>H NMR spectra). Solvent system for flash column chromatography: cyclohexane/EtOAc: 90/10; White solid; <sup>1</sup>H NMR (300 MHz, CDCl<sub>3</sub>): δ 7.70 (d, *J* = 8.2 Hz, 2H), 7.32-7.25 (m, 4H), 7.24-7.18 (m, 1H), 7.18-7.12 (m, 2H), 5.64 (ddt, *J* = 16.6, 10.1 and 6.5 Hz, 1H), 5.23-5.12 (m, 2H), 3.81 (d, *J* = 6.3 Hz, 2H), 3.33 (s, 2H), 2.42 (s, 3H); <sup>13</sup>C NMR (75 MHz, CDCl<sub>3</sub>): δ 143.3, 138.6, 137.2, 133.3, 129.8, 128.9, 128.6, 127.2, 126.6, 119.1, 51.1, 48.8, 35.5-34.4 (m<sub>C-D</sub>), 21.6; IR (ATR):  $\nu_{\max}$  3026, 1496, 1449, 1335, 1155, 1089, 983, 919, 815, 761, 738, 700, 666 cm<sup>-1</sup>; ESIHRMS  $m/z$  calcd for C<sub>18</sub>H<sub>20</sub>D<sub>2</sub>NO<sub>2</sub>S [M+H]<sup>+</sup> 318.1491, found 318.1494.

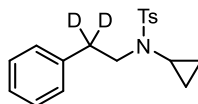13m<sub>dβ2</sub>

**N-Cyclopropyl-N-(2-phenylethyl-2,2-d<sub>2</sub>)4-methylbenzenesulfonamide 13m<sub>dβ2</sub>.** Prepared according to general procedure III starting from 640 μmol of the corresponding ynamide. Yield: 55% (111 mg, 350 μmol), β deuteration: 86% (calculated by integration of the residual signal in the <sup>1</sup>H NMR spectra). Solvent system for flash column chromatography: petroleum ether/EtOAc: 95/5; Colorless oil; <sup>1</sup>H NMR (400 MHz, CDCl<sub>3</sub>): δ 7.75 (d, *J* = 8.1 Hz, 2H), 7.33-7.26 (m, 4H), 7.24-7.16 (m, 3H), 3.38 (obs. s, 2H), 2.43 (s, 3H), 2.07 (tt, *J* = 7.0 and 3.8 Hz, 1H), 0.77-0.71 (m, 2H), 0.70-0.63 (m, 2H); <sup>13</sup>C NMR (100 MHz, CDCl<sub>3</sub>): δ 143.5, 139.0, 135.8, 129.7, 129.0, 128.6, 127.8, 126.6, 52.9, 30.9, 21.7, 7.6, (1C-D missing); IR (ATR):  $\nu_{\max}$  3024, 2923, 1599, 1496, 1449, 1336, 1159, 1124, 1112, 1094, 1027, 863, 823, 740, 714, 699, 652 cm<sup>-1</sup>; ESIHRMS  $m/z$  calcd for C<sub>18</sub>H<sub>20</sub>D<sub>2</sub>NO<sub>2</sub>S [M+H]<sup>+</sup> 318.1491, found 318.1497.

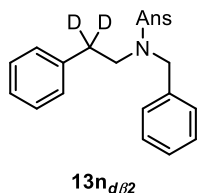

**N-Benzyl-2-methoxy-N-(2-phenylethyl-2,2-d<sub>2</sub>)benzenesulfonamide 13n<sub>dβ2</sub>** Prepared according to general procedure III starting from 800 μmol of the corresponding ynamide. Yield: 71% (218 mg, 569 μmol), β deuteration: 95% (calculated by integration of the residual signal in the <sup>1</sup>H NMR spectra). Solvent system for flash column chromatography: petroleum ether/EtOAc: 80/20; White solid; <sup>1</sup>H NMR (400 MHz, CDCl<sub>3</sub>): δ 8.01 (dd, *J* = 7.8 and 1.8 Hz, 1H), 7.55-7.50 (ddd, *J* = 8.4, 7.5 and 1.8 Hz, 1H), 7.34-7.24 (m, 5H), 7.22-7.11 (m, 3H), 7.06 (td, *J* = 7.6 and 1.0 Hz, 1H), 6.98 (d, *J* = 8.4 Hz, 1H), 6.96-6.92 (m, 2H), 4.49 (s, 2H), 3.86 (s, 3H), 3.37 (s, 2H); <sup>13</sup>C NMR (100 MHz, CDCl<sub>3</sub>): δ 156.8, 138.8, 137.1, 134.5, 131.5, 128.9, 128.8, 128.7, 128.5, 128.5, 127.8, 126.5, 120.5, 112.3, 56.0, 52.2, 48.9, 34.3-33.7(m<sub>C-D</sub>); IR (ATR): ν<sub>max</sub> 3026, 2921, 1590, 1466, 1328, 1280, 1154, 1134, 1111, 1068, 1020, 938, 806, 759, 735, 700 cm<sup>-1</sup>; ESIHRMS *m/z* calcd for C<sub>22</sub>H<sub>22</sub>D<sub>2</sub>NO<sub>3</sub>S [M+H]<sup>+</sup> 384.1597, found 384.1562.

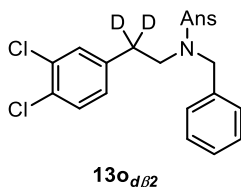

**N-Benzyl-N-[2-(3,4-dichlorophenyl)ethyl-2,2-d<sub>2</sub>]-2-methoxybenzenesulfonamide 13o<sub>dβ2</sub>** Prepared according to general procedure III starting from 800 μmol of the corresponding ynamide. Yield: 71% (256 mg, 568 μmol), β deuteration: 94% (calculated by integration of the residual signal in the <sup>1</sup>H NMR spectra). Solvent system for flash column chromatography: petroleum ether/EtOAc: 80/20; White solid, Mp: 94 °C; <sup>1</sup>H NMR (400 MHz, CDCl<sub>3</sub>): δ 7.94 (dd, *J* = 7.8 and 1.8 Hz, 1H), 7.50 (ddd, *J* = 8.4, 7.5 and 1.7 Hz, 1H), 7.32-7.21 (m, 5H), 7.18 (d, *J* = 8.3 Hz, 1H), 7.02 (td, *J* = 7.8 and 1.0 Hz, 1H), 6.96-6.93 (m, 2H), 6.75 (dd, *J* = 8.3 and 2.0 Hz, 1H), 4.44 (s, 2H), 3.84 (s, 3H), 3.34 (s, 2H); <sup>13</sup>C NMR (100 MHz, CDCl<sub>3</sub>): δ 156.6, 139.0, 136.7, 134.5, 132.2, 131.3, 130.6, 130.4, 130.3, 128.7, 128.5, 128.4, 128.2, 127.9, 120.5, 112.3, 56.0, 52.4, 48.5, 34.1-33.5 (m<sub>C-D</sub>); IR (ATR): ν<sub>max</sub> 3064, 2940, 1590, 1480, 1329, 1280, 1154, 1133, 1020, 939, 805, 757, 700 cm<sup>-1</sup>; ESIHRMS *m/z* calcd for C<sub>22</sub>H<sub>20</sub>D<sub>2</sub>Cl<sub>2</sub>NO<sub>3</sub>S [M+H]<sup>+</sup> 452.0817, found 452.0821.

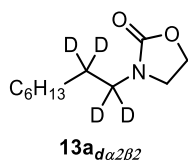

**3-(Octyl-1,1,2,2-d<sub>4</sub>)oxazolidin-2-one 13a<sub>dα2β2</sub>**. Prepared according to general procedure IV starting from 1.0 mmol of the corresponding ynamide and using freshly prepared trifluoromethanesulfonic acid-*d*. Yield: 68% (139 mg, 684 μmol), α and β deuteration: >99% and 91% (calculated by integration of the residual signals in the <sup>1</sup>H NMR spectra). Solvent system for flash column chromatography: petroleum ether/EtOAc: 70/30; Pale yellow oil; <sup>1</sup>H NMR (400 MHz, CDCl<sub>3</sub>): δ 4.34-4.28 (m, 2H), 3.57-3.51 (m, 2H), 1.34-1.22 (m, 10H), 0.90-0.85 (m, 3H); <sup>13</sup>C NMR (100 MHz, CDCl<sub>3</sub>): δ 158.6, 61.8, 44.6, 31.9, 29.3 (2C), 26.5, 22.8, 14.2, (2C-D missing); IR (ATR): ν<sub>max</sub> 2924, 2855, 1746, 1483, 1422, 1269, 1041, 762 cm<sup>-1</sup>; ESIHRMS *m/z* calcd for C<sub>11</sub>H<sub>18</sub>D<sub>4</sub>NO<sub>2</sub> [M+H]<sup>+</sup> 204.1896, found 204.1891.

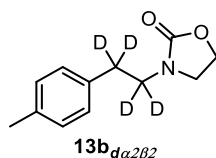

**3-[2-(*p*-Tolyl)ethyl]-1,1,2,2-*d*<sub>4</sub>oxazolidin-2-one 13b<sub>d $\alpha$ 2 $\beta$ 2</sub>.** Prepared according to general procedure IV starting from 853  $\mu\text{mol}$  of the corresponding ynamide and using freshly prepared trifluoromethanesulfonic acid-*d*. Yield: 66% (117 mg, 559  $\mu\text{mol}$ ),  $\alpha$  and  $\beta$  deuteration: >99% and 87% (calculated by integration of the residual signals in the  $^1\text{H}$  NMR spectra). Solvent system for flash column chromatography: petroleum ether/EtOAc: 60/40; White solid; Mp: 79 °C;  $^1\text{H}$  NMR (400 MHz,  $\text{CDCl}_3$ ):  $\delta$  7.11 (app. s, 4H), 4.26-4.21 (m, 2H), 3.43-3.38 (m, 2H), 2.32 (s, 3H);  $^{13}\text{C}$  NMR (100 MHz,  $\text{CDCl}_3$ ):  $\delta$  158.5, 136.3, 135.3, 129.5, 128.6, 61.8, 45.1, 33.8-32.5 (m<sub>C-D</sub>), 21.2, (1C-D missing); IR (ATR):  $\nu_{\text{max}}$  2919, 1733, 1474, 1431, 1267, 1034, 803, 755  $\text{cm}^{-1}$ ; ESIHRMS  $m/z$  calcd for  $\text{C}_{12}\text{H}_{12}\text{D}_4\text{NO}_2$  [ $\text{M}+\text{H}$ ]<sup>+</sup> 210.1427, found 210.1424.

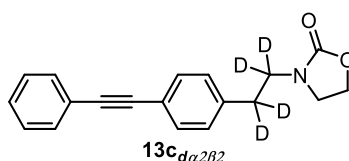

**3-{2-[4-(Phenylethynyl)phenyl]ethyl}-1,1,2,2-*d*<sub>4</sub>oxazolidin-2-one 13c<sub>d $\alpha$ 2 $\beta$ 2</sub>.** Prepared according to general procedure IV. Yield: 39% (35 mg, 118  $\mu\text{mol}$ ),  $\alpha$  and  $\beta$  deuteration: 99% and 84% (calculated by integration of the residual signals in the  $^1\text{H}$  NMR spectra). Solvent system for flash column chromatography: cyclohexane/EtOAc: 40/60; Pale yellow solid;  $^1\text{H}$  NMR (400 MHz,  $\text{CDCl}_3$ ):  $\delta$  7.55-7.50 (m, 2H), 7.48 (d,  $J = 8.3$  Hz, 2H), 7.38-7.32 (m, 3H), 7.22 (d,  $J = 8.3$  Hz, 2H), 4.28-4.22 (m, 2H), 3.43-3.36 (m, 2H);  $^{13}\text{C}$  NMR (100 MHz,  $\text{CDCl}_3$ ):  $\delta$  158.6, 138.8, 132.0, 131.7, 128.9, 128.5, 128.4, 123.4, 121.8, 89.6, 89.2, 62.0, 45.3, 33.9-32.7 (m<sub>C-D</sub>), (1C-D missing); IR (ATR):  $\nu_{\text{max}}$  2919, 1739, 1473, 1434, 1272, 1034, 760, 695  $\text{cm}^{-1}$ ; ESIHRMS  $m/z$  calcd for  $\text{C}_{19}\text{H}_{14}\text{D}_4\text{NO}_2$  [ $\text{M}+\text{H}$ ]<sup>+</sup> 296.1583, found 296.1588.

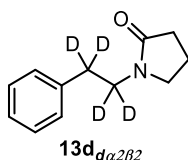

**1-(2-Phenylethyl)-1,1,2,2-*d*<sub>4</sub>pyrrolidin-2-one 13d<sub>d $\alpha$ 2 $\beta$ 2</sub>.** Prepared according to general procedure IV starting from 540  $\mu\text{mol}$  of the corresponding ynamide and using freshly prepared trifluoromethanesulfonic acid-*d*. Yield: 57% (60 mg, 310  $\mu\text{mol}$ ),  $\alpha$  and  $\beta$  deuteration: 99% and 85% (calculated by integration of the residual signals in the  $^1\text{H}$  NMR spectra). Solvent system for flash column chromatography: cyclohexane/EtOAc: 30/70; White solid;  $^1\text{H}$  NMR (400 MHz,  $\text{CDCl}_3$ ):  $\delta$  7.29-7.25 (m, 2H), 7.21-7.17 (m, 3H), 3.22 (t,  $J = 6.8$  Hz, 2H), 2.32 (t,  $J = 8.4$  Hz, 2H), 1.91 (quint.,  $J = 7.6$  Hz, 2H);  $^{13}\text{C}$  NMR (100 MHz,  $\text{CDCl}_3$ ):  $\delta$  175.0, 138.9, 128.8, 128.6, 126.6, 47.7, 43.9-43.1 (m<sub>C-D</sub>), 33.9-33.1 (m<sub>C-D</sub>), 31.1, 18.2; IR (ATR):  $\nu_{\text{max}}$  2916, 1673, 1423, 1293, 891, 740, 701, 623  $\text{cm}^{-1}$ ; ESIHRMS  $m/z$  calcd for  $\text{C}_{12}\text{H}_{12}\text{D}_4\text{NO}$  [ $\text{M}+\text{H}$ ]<sup>+</sup> 194.1477, found 194.1476.

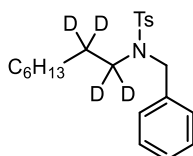**13e**<sub>d $\alpha$ 2 $\beta$ 2</sub>

**N-Benzyl-4-methyl-N-(octyl-1,1,2,2-*d*<sub>4</sub>)benzenesulfonamide 13e**<sub>d $\alpha$ 2 $\beta$ 2</sub>. Prepared according to general procedure IV starting from 270  $\mu$ mol of the corresponding ynamide and using freshly prepared trifluoromethanesulfonic acid-*d*. Yield: 57% (58 mg, 154  $\mu$ mol),  $\alpha$  deuteration: >99% (calculated by integration of the residual signal in the <sup>1</sup>H NMR spectra) and  $\alpha$  deuteration: 84% (calculated by integration of the deuterium signal in <sup>2</sup>H NMR spectra with C<sub>2</sub>D<sub>2</sub>Cl<sub>4</sub> as a reference). Solvent system for flash column chromatography: cyclohexane/EtOAc: 90/10; White solid; <sup>1</sup>H NMR (400 MHz, CDCl<sub>3</sub>):  $\delta$  7.73 (d, *J* = 8.0 Hz, 2H), 7.33-7.24 (m, 7H), 4.31 (s, 2H), 2.44 (s, 3H), 1.29-1.05 (m, 10H), 0.85 (t, *J* = 7.2 Hz, 3H); <sup>13</sup>C NMR (100 MHz, CDCl<sub>3</sub>):  $\delta$  143.2, 137.4, 136.8, 129.8, 128.6, 128.4, 127.8, 127.3, 51.9, 31.8, 29.2, 29.1, 26.5, 22.7, 21.6, 14.2, (2C-D missing); <sup>2</sup>H NMR (92 MHz, CHCl<sub>3</sub>):  $\delta$  1.33 (s, 2D); IR (ATR):  $\nu_{\text{max}}$  2925, 2856, 1455, 1340, 1161, 866, 815, 729, 699 cm<sup>-1</sup>; ESIHRMS *m/z* calcd for C<sub>22</sub>H<sub>28</sub>D<sub>4</sub>NO<sub>2</sub>S [M+H]<sup>+</sup> 378.2399, found 378.2383.

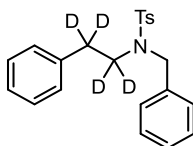**13f**<sub>d $\alpha$ 2 $\beta$ 2</sub>

**N-Benzyl-4-methyl-N-(2-phenylethyl-1,1,2,2-*d*<sub>4</sub>)benzenesulfonamide 13f**<sub>d $\alpha$ 2 $\beta$ 2</sub>. Prepared according to general procedure IV starting from 220  $\mu$ mol of the corresponding ynamide. Yield: 77% (63 mg, 170  $\mu$ mol),  $\alpha$  and  $\beta$  deuteration: 98% and 88% (calculated by integration of the residual signals in the <sup>1</sup>H NMR spectra). Solvent system for flash column chromatography: cyclohexane/EtOAc: 90/10; White solid; <sup>1</sup>H NMR (400 MHz, CDCl<sub>3</sub>):  $\delta$  7.75 (d, *J* = 8.2 Hz, 2H), 7.37-7.27 (m, 7H), 7.25-7.13 (m, 3H), 6.95 (d, *J* = 8.0 Hz, 2H), 4.34 (s, 2H), 2.45 (s, 3H); <sup>13</sup>C NMR (100 MHz, CDCl<sub>3</sub>):  $\delta$  143.4, 138.5, 137.1, 136.4, 129.9, 128.7 (2C), 128.6 (2C), 128.0, 127.3, 126.5, 52.3, 49.2-48.4 (m<sub>C-D</sub>), 35.2-34.1 (m<sub>C-D</sub>), 21.6; IR (ATR):  $\nu_{\text{max}}$  3023, 1495, 1338, 1153, 1097, 821, 771, 744, 726, 700, 653 cm<sup>-1</sup>; ESIHRMS *m/z* calcd for C<sub>22</sub>H<sub>20</sub>D<sub>4</sub>NO<sub>2</sub>S [M+H]<sup>+</sup> 370.1773, found 370.1775.

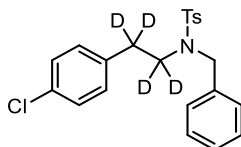**13g**<sub>d $\alpha$ 2 $\beta$ 2</sub>

**N-Benzyl-N-[2-(4-chlorophenyl)ethyl-1,1,2,2-*d*<sub>4</sub>]-4-methylbenzenesulfonamide 13g**<sub>d $\alpha$ 2 $\beta$ 2</sub>. Prepared according to general procedure IV. Yield: 75% (91 mg, 225  $\mu$ mol),  $\alpha$  and  $\beta$  deuteration: 99% and 95% (calculated by integration of the residual signals in the <sup>1</sup>H NMR spectra). Solvent system for flash column chromatography: cyclohexane/EtOAc: 90/10; White solid; <sup>1</sup>H NMR (300 MHz, CDCl<sub>3</sub>):  $\delta$  7.72 (d, *J* = 8.2 Hz, 2H), 7.35-7.22 (m, 7H), 7.15 (app. dt, *J* = 8.4 and 2.0 Hz, 2H), 6.85 (app. dt, *J* = 8.4 and 2.0 Hz, 2H), 4.31 (s, 2H), 2.44 (s, 3H); <sup>13</sup>C NMR (75 MHz, CDCl<sub>3</sub>):  $\delta$  143.5, 137.0, 136.9, 136.2, 132.3, 130.1, 129.9, 128.8, 128.7, 128.6, 128.1, 127.3, 52.5, 21.7, (2C-D missing); IR (ATR):  $\nu_{\text{max}}$  1490, 1333, 1162, 1089, 1073, 933, 863, 818, 768, 735, 706, 658 cm<sup>-1</sup>; ESIHRMS *m/z* calcd for C<sub>22</sub>H<sub>19</sub>D<sub>4</sub>ClNO<sub>2</sub>S [M+H]<sup>+</sup> 404.1384, found 404.1392.

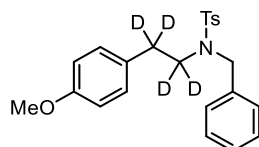**13h <sub>$\alpha\beta 2$</sub>** **N-Benzyl-N-[2-(4-methoxyphenyl)ethyl]-1,1,2,2-d<sub>4</sub>]-4-methylbenzenesulfonamide 13h <sub>$\alpha\beta 2$</sub> .**

Prepared according to general procedure IV starting from 220  $\mu$ mol of the corresponding ynamide. Yield: 61% (54 mg, 135  $\mu$ mol),  $\alpha$  and  $\beta$  deuteration: >99% and 89% (calculated by integration of the residual signals in the  $^1\text{H}$  NMR spectra). Solvent system for flash column chromatography: cyclohexane/EtOAc: 90/10; Yellow solid;  $^1\text{H}$  NMR (400 MHz,  $\text{CDCl}_3$ ):  $\delta$  7.74 (d,  $J = 8.2$  Hz, 2H), 7.36-7.26 (m, 7H), 6.89-6.84 (m, 2H), 6.74 (d,  $J = 8.5$  Hz, 1H<sup>†</sup>), 4.33 (s, 2H), 3.76 (s, 3H), 2.44 (s, 3H);  $^{13}\text{C}$  NMR (100 MHz,  $\text{CDCl}_3$ ):  $\delta$  158.3, 143.4, 137.2, 136.4, 130.5, 129.9, 129.7, 128.7, 128.6, 128.0, 127.3, 114.0, 55.3, 52.3, 49.5-48.6 (m<sub>C-D</sub>), 34.3-33.2 (m<sub>C-D</sub>), 21.6; IR (ATR):  $\nu_{\text{max}}$  2957, 1513, 1495, 1333, 1246, 1158, 1033, 816, 734, 722, 705, 656  $\text{cm}^{-1}$ ; ESIHRMS  $m/z$  calcd for  $\text{C}_{23}\text{H}_{22}\text{D}_4\text{NO}_3\text{S}$   $[\text{M}+\text{H}]^+$  400.1879, found 400.1891.

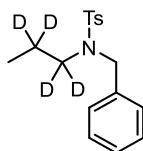**13i <sub>$\alpha\beta 2$</sub>** 

**N-Benzyl-4-methyl-N-(propyl-1,1,2,2-d<sub>4</sub>)benzenesulfonamide 13i <sub>$\alpha\beta 2$</sub> .** Prepared according to general procedure IV starting from 140  $\mu$ mol of the corresponding ynamide. Yield: 79% (34 mg, 111  $\mu$ mol),  $\alpha$  and  $\beta$  deuteration: >99% and 92% (calculated by integration of the residual signals in the  $^1\text{H}$  NMR spectra). Solvent system for flash column chromatography: cyclohexane/EtOAc: 95/5; Colorless oil;  $^1\text{H}$  NMR (400 MHz,  $\text{CDCl}_3$ ):  $\delta$  7.73 (d,  $J = 8.2$  Hz, 2H), 7.35-7.25 (m, 7H), 4.31 (s, 2H), 2.44 (s, 3H), 0.68 (s, 3H);  $^{13}\text{C}$  NMR (100 MHz,  $\text{CDCl}_3$ ):  $\delta$  143.2, 137.4, 136.8, 129.8, 128.6, 128.3, 127.8, 127.3, 52.0, 49.6-48.8 (m<sub>C-D</sub>), 21.7, 21.2-20.2 (m<sub>C-D</sub>), 11.0; IR (ATR):  $\nu_{\text{max}}$  2968, 1320, 1153, 1115, 814, 762, 727, 694, 655  $\text{cm}^{-1}$ ; ESIHRMS  $m/z$  calcd for  $\text{C}_{17}\text{H}_{18}\text{D}_4\text{NO}_2\text{S}$   $[\text{M}+\text{H}]^+$  308.1617, found 308.1624.

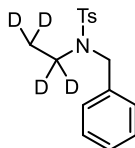**13j <sub>$\alpha\beta 2$</sub>** 

**N-Benzyl-N-(ethyl-1,1,2,2-d<sub>4</sub>)-4-methylbenzenesulfonamide 13j <sub>$\alpha\beta 2$</sub> .** Prepared according to general procedure IV starting from 350  $\mu$ mol of the corresponding ynamide. Yield: 50% (51 mg, 173  $\mu$ mol),  $\alpha$  and  $\beta$  deuteration: >99% and 92% (calculated by integration of the residual signals in the  $^1\text{H}$  NMR spectra). Solvent system for flash column chromatography: petroleum ether/EtOAc: 95/5; Yellow oil;  $^1\text{H}$  NMR (400 MHz,  $\text{CDCl}_3$ ):  $\delta$  7.74 (d,  $J = 8.3$  Hz, 2H), 7.35-7.26 (m, 7H), 4.33 (s, 2H), 2.44 (s, 3H), 0.90-0.85 (m, 1.16H: 1.00H from the desired deuterated product and 0.16H from the residual non deuterated molecule);  $^{13}\text{C}$  NMR (100 MHz,  $\text{CDCl}_3$ ):  $\delta$  143.3, 137.5, 136.7, 129.8, 128.7, 128.3, 127.8, 127.3, 51.1, 21.6, 13.2-12.1 (m<sub>C-D</sub>), (1C-D missing); IR (ATR):  $\nu_{\text{max}}$  2960, 1598, 1496, 1455, 1336, 1304, 1158, 1097, 1076, 944, 860, 812, 751, 702, 693, 652  $\text{cm}^{-1}$ ; ESIHRMS  $m/z$  calcd for  $\text{C}_{16}\text{H}_{16}\text{D}_4\text{NO}_2\text{S}$   $[\text{M}+\text{H}]^+$  294.1460, found 294.1470.

<sup>†</sup> 1H missing due to partial deuteration.

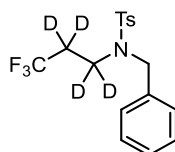**13k**<sub>d $\alpha$ 2 $\beta$ 2</sub>

**N-Benzyl-N-(3,3,3-trifluoropropyl-1,1,2,2-d<sub>4</sub>)-4-methylbenzenesulfonamide 13k<sub>d $\alpha$ 2 $\beta$ 2</sub>.** Prepared according to general procedure IV starting from 250  $\mu$ mol of the corresponding ynamide. Yield: 49% (44 mg, 123  $\mu$ mol),  $\alpha$  and  $\beta$  deuteration: >99% and 91% (calculated by integration of the residual signals in the <sup>1</sup>H NMR spectra). Solvent system for flash column chromatography: petroleum ether/EtOAc: 95/5; Pale yellow solid; Mp: 81 °C; <sup>1</sup>H NMR (400 MHz, CDCl<sub>3</sub>):  $\delta$  7.74 (d,  $J$  = 8.3 Hz, 2H), 7.37-7.31 (m, 5H), 7.29-7.26 (m, 2H), 4.29 (s, 2H), 2.46 (s, 3H); <sup>13</sup>C NMR (100 MHz, CDCl<sub>3</sub>):  $\delta$  144.0, 136.1, 135.7, 130.1, 129.0, 128.6, 128.5, 127.4, 125.6 (q,  $J_{C-F}$  = 276.7 Hz), 53.1, 21.7, (2C-D missing); <sup>19</sup>F (376 MHz, CDCl<sub>3</sub>):  $\delta$  -66.6; IR (ATR):  $\nu_{\max}$  2960, 1457, 1327, 1309, 1192, 1170, 1153, 1103, 1011, 868, 815, 772, 727, 696, 659 cm<sup>-1</sup>; ESIHRMS  $m/z$  calcd for C<sub>17</sub>H<sub>15</sub>D<sub>4</sub>F<sub>3</sub>NO<sub>2</sub>S [M+H]<sup>+</sup> 362.1334, found 362.1338.

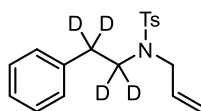**13l**<sub>d $\alpha$ 2 $\beta$ 2</sub>

**N-Allyl-N-(2-phenylethyl-1,1,2,2-d<sub>4</sub>)benzenesulfonamide 13l<sub>d $\alpha$ 2 $\beta$ 2</sub>.** Prepared according to general procedure IV. Yield: 72% (69 mg, 216  $\mu$ mol),  $\alpha$  and  $\beta$  deuteration: 99% and 92% (calculated by integration of the residual signals in the <sup>1</sup>H NMR spectra). Solvent system for flash column chromatography: cyclohexane/EtOAc: 90/10; White solid; <sup>1</sup>H NMR (300 MHz, CDCl<sub>3</sub>):  $\delta$  7.70 (d,  $J$  = 8.2 Hz, 2H), 7.33-7.25 (m, 4H), 7.25-7.18 (m, 1H), 7.18-7.11 (m, 2H), 5.64 (ddt,  $J$  = 16.7, 10.1 and 6.5 Hz, 1H), 5.24-5.12 (m, 2H), 3.81 (d,  $J$  = 6.4 Hz, 2H), 2.42 (s, 3H); <sup>13</sup>C NMR (75 MHz, CDCl<sub>3</sub>):  $\delta$  143.3, 138.6, 137.2, 133.3, 129.8, 128.9, 128.6, 127.2, 126.6, 119.1, 51.0, 48.8-47.7 (m<sub>C-D</sub>), 35.4-34.2 (m<sub>C-D</sub>), 21.6; IR (ATR):  $\nu_{\max}$  2924, 1336, 1288, 1160, 1093, 922, 862, 814, 735, 700, 665 cm<sup>-1</sup>; ESIHRMS  $m/z$  calcd for C<sub>18</sub>H<sub>18</sub>D<sub>4</sub>NO<sub>2</sub>S [M+H]<sup>+</sup> 320.1617, found 320.1617.

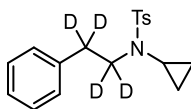**13m**<sub>d $\alpha$ 2 $\beta$ 2</sub>

**N-Cyclopropyl-N-(2-phenylethyl-1,1,2,2-d<sub>4</sub>)-4-methylbenzenesulfonamide 13m<sub>d $\alpha$ 2 $\beta$ 2</sub>.** Prepared according to general procedure IV starting from 640  $\mu$ mol of the corresponding ynamide. Yield: 50% (102 mg, 320  $\mu$ mol).  $\alpha$  and  $\beta$  deuteration: >99% and 88% (calculated by integration of the residual signals in the <sup>1</sup>H NMR spectra). Solvent system for flash column chromatography: petroleum ether/EtOAc: 95/5; Colorless oil; <sup>1</sup>H NMR (400 MHz, CDCl<sub>3</sub>):  $\delta$  7.75 (d,  $J$  = 8.3 Hz, 2H), 7.33-7.26 (m, 4H), 7.24-7.16 (m, 3H), 2.43 (s, 3H), 2.07 (tt,  $J$  = 7.0 and 3.8 Hz, 1H), 0.77-0.72 (m, 2H), 0.69-0.63 (m, 2H); <sup>13</sup>C NMR (100 MHz, CDCl<sub>3</sub>):  $\delta$  143.5, 139.0, 135.9, 129.7, 129.0, 128.6, 127.8, 126.6, 30.8, 21.7, 7.6, (2 C-D missing); IR (ATR):  $\nu_{\max}$  3026, 2924, 1599, 1496, 1450, 1369, 1338, 1307, 1236, 1161, 1096, 1027, 814, 769, 738, 711, 689, 647 cm<sup>-1</sup>; ESIHRMS  $m/z$  calcd for C<sub>18</sub>H<sub>18</sub>D<sub>4</sub>NO<sub>2</sub>S [M+H]<sup>+</sup> 320.1617, found 320.1626.

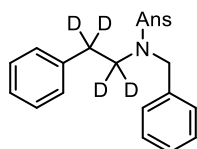**13n<sub>d $\alpha$ 2 $\beta$ 2</sub>**

**N-Benzyl-2-methoxy-N-(2-phenylethyl)-1,1,2,2-d<sub>4</sub>benzenesulfonamide 13n<sub>d $\alpha$ 2 $\beta$ 2</sub>.** Prepared according to general procedure IV starting from 800  $\mu$ mol of the corresponding ynamide. Yield: 68% (210 mg, 545  $\mu$ mol),  $\alpha$  and  $\beta$  deuteration: 97% and 95% (calculated by integration of the residual signals in the <sup>1</sup>H NMR spectra). Solvent system for flash column chromatography: petroleum ether/EtOAc: 80/20; White solid; <sup>1</sup>H NMR (300 MHz, CDCl<sub>3</sub>):  $\delta$  8.01 (dd,  $J$  = 7.8 and 1.8 Hz, 1H), 7.55-7.50 (ddd,  $J$  = 8.4, 7.5 and 1.8 Hz, 1H), 7.32-7.24 (m, 5H), 7.22-7.14 (m, 3H), 7.06 (td,  $J$  = 7.8 and 0.9 Hz, 1H), 7.00-6.92 (m, 3H), 4.48 (s, 2H), 3.86 (s, 3H); <sup>13</sup>C NMR (150 MHz, CDCl<sub>3</sub>):  $\delta$  156.8, 138.7, 137.0, 134.4, 131.4, 129.0, 128.8, 128.7, 128.5, 128.5, 127.8, 126.4, 120.4, 112.2, 56.0, 52.1, (2 C-D missing); IR (ATR):  $\nu_{\max}$  3027, 2918, 1591, 1480, 1331, 1280, 1154, 1134, 1073, 1020, 870, 804, 757, 733, 700 cm<sup>-1</sup>.

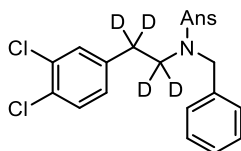**13o<sub>d $\alpha$ 2 $\beta$ 2</sub>**

**N-Benzyl-N-[2-(3,4-dichlorophenyl)ethyl]-1,1,2,2-d<sub>4</sub>-2-methoxybenzenesulfonamide 13o<sub>d $\alpha$ 2 $\beta$ 2</sub>.** Prepared according to general procedure IV starting from 800  $\mu$ mol of the corresponding ynamide. Yield: 71% (258 mg, 568  $\mu$ mol),  $\alpha$  and  $\beta$  deuteration: 99% and 94% (calculated by integration of the residual signals in the <sup>1</sup>H NMR spectra). Solvent system for flash column chromatography: petroleum ether/EtOAc: 80/20; White solid; Mp: 92 °C; <sup>1</sup>H NMR (400 MHz, CDCl<sub>3</sub>):  $\delta$  7.96 (dd,  $J$  = 7.8 and 1.8 Hz, 1H), 7.52 (ddd,  $J$  = 8.3, 7.5 and 1.8 Hz, 1H), 7.34-7.24 (m, 5H), 7.19 (d,  $J$  = 8.3 Hz, 1H), 7.03 (td,  $J$  = 7.6 and 1.0 Hz, 1H), 6.98-6.95 (m, 2H), 6.77 (dd,  $J$  = 8.3 and 2.0 Hz, 1H), 4.46 (s, 2H), 3.86 (s, 3H); <sup>13</sup>C NMR (100 MHz, CDCl<sub>3</sub>):  $\delta$  156.6, 138.9, 136.7, 134.5, 132.1, 131.2, 130.6, 130.3 (2C), 128.6, 128.4, 128.4, 128.1, 127.8, 120.4, 112.2, 55.9, 52.2, 48.9-47.9 (m<sub>C-D</sub>), 33.9-33.3 (m<sub>C-D</sub>); IR (ATR):  $\nu_{\max}$  3067, 3027, 2942, 1591, 1480, 1331, 1280, 1155, 1133, 1072, 1020, 804, 756, 737, 702, 682 cm<sup>-1</sup>; ESIHRMS  $m/z$  calcd for C<sub>22</sub>H<sub>18</sub>D<sub>4</sub>Cl<sub>2</sub>NO<sub>3</sub>S [M+H]<sup>+</sup> 454.0943, found 454.0942.



## Experimental Procedure and Characterization Data: Synthesis of Deuterated Biologically Relevant Amines

### General procedure V: Pd-catalyzed double cross-coupling of aryl chlorides and methanol<sup>S8</sup>

An oven-dried 15 mL pressure tube was charged with <sup>t</sup>BuBrettPhos (8 mg, 16  $\mu$ mol), sodium *tert*-butoxide (111 mg, 1.15 mmol) and the sulfonamide (470  $\mu$ mol), fitted with a rubber septum, evacuated under high vacuum and backfilled with argon three times before adding methanol (190  $\mu$ L, 4.70 mmol). In a glovebox, an oven-dried 10 mL round bottom flask was charged with <sup>t</sup>BuBrettPhos Pd G3 (14 mg, 16  $\mu$ mol), fitted with a rubber septum and then taken outside the glovebox. Dry 1,4-dioxane (1.0 mL) was next added and the resulting mixture was stirred at rt for 1 minute until the formation of a homogeneous solution that was successively added to the pressure tube via cannula. The rubber septum was next replaced by a Teflon-coated screw cap and the resulting reaction mixture was stirred at 50 °C for 48 hours. The reaction mixture was then cooled to rt, filtered over a plug of silica gel (washed with EtOAc) and concentrated under reduced pressure. The crude residue was finally purified by flash column chromatography over silica gel to afford the desired methyl protected catechol.

### General procedure VI: Ni-catalyzed *o*-anisylsulfonyl deprotection<sup>S9</sup>

A 50 mL round bottom flask was charged with the sulfonamide (260  $\mu$ mol) and nickel(II) acetylacetonate (3 mg, 13  $\mu$ mol), fitted with a rubber septum, evacuated under high vacuum and backfilled with argon three times before adding Et<sub>2</sub>O (7.0 mL). Isopropylmagnesium chloride (2.0 M in Et<sub>2</sub>O, 585  $\mu$ L, 1.17 mmol) was then added dropwise and the reaction mixture was stirred at rt for 3 hours before being quenched with a saturated aqueous solution of NH<sub>4</sub>Cl. The layers were separated and the aqueous layer was extracted with EtOAc (2x). The combined organic layers were washed with a saturated aqueous solution of NH<sub>4</sub>Cl (3x), water (1x) and brine (1x), dried over MgSO<sub>4</sub>, filtered and concentrated under reduced pressure. The crude residue was then dissolved in Et<sub>2</sub>O and an excess of HCl (6.7 M in Et<sub>2</sub>O) was added dropwise at 0 °C. The white precipitate was recovered by filtration, carefully washed with Et<sub>2</sub>O (3x) and dried under high vacuum to afford the desired amine hydrochloride that was used without further purification in the next step.

### General procedure VII: Reductive *o*-anisylsulfonyl deprotection

To a solution of naphthalene (290 mg, 2.27 mmol) in 1,2-dimethoxyethane (4.5 mL) under argon was added sodium (52 mg, 2.27 mmol) in small portions. The resulting mixture was sonicated for a few minutes until persistence of a deep blue/green color and subsequently stirred at rt for 1 to 2 hours (until complete disappearance of sodium). The resulting solution was then added dropwise via cannula to a solution of the sulfonamide (100 mg, 227  $\mu$ mol) in 1,2-dimethoxyethane (1.0 mL) at -78 °C under argon. The reaction mixture was then allowed to warm to rt and stirred until completion (TLC analysis revealed complete disappearance of the starting material after typically 5-10 minutes). The mixture was then poured into a saturated aqueous solution of NaHCO<sub>3</sub>, the layers were separated, and the aqueous layer was extracted with Et<sub>2</sub>O (3x). The organic layers were combined, dried over MgSO<sub>4</sub>, filtered and concentrated under reduced pressure. The crude residue was then dissolved in Et<sub>2</sub>O and an excess of HCl (6.7 M in Et<sub>2</sub>O) was added dropwise at 0 °C. The white precipitate was recovered by filtration, carefully washed with Et<sub>2</sub>O (3x) and dried under high vacuum to afford the desired deprotected amine hydrochloride that was used without further purification in the next step.

### General procedure VIII: Hydrogenative benzyl deprotection

A glass vial was charged with the *N*-benzylamine hydrochloride (160  $\mu$ mol), palladium on charcoal (10%, 50 mg) and methanol (3.0 mL). The vial was placed in an autoclave, purged with N<sub>2</sub>, pressurized with H<sub>2</sub> (10 bars) and stirred at rt for 24 hours. After the reactor was depressurized and purged with N<sub>2</sub>, the reaction mixture was filtered over a plug of Celite® (washed with methanol) and concentrated under reduced pressure to afford the desired unprotected amine hydrochloride without further purification.

**General procedure IX: Methyl ether deprotection**<sup>S10</sup>

A solution of dimethoxyphenylamine hydrochloride (450  $\mu\text{mol}$ ) and sodium hypophosphite monohydrate (49 mg, 462  $\mu\text{mol}$ ) in concentrated hydrobromic acid (45%, 3.0 mL) was refluxed for 2 hours under argon. The reaction mixture was diluted with water (10 mL) and concentrated under reduced pressure. The residue was diluted with water (10 mL) and concentrated two more times before being dried under high vacuum to afford the desired amine hydrobromide without further purification.

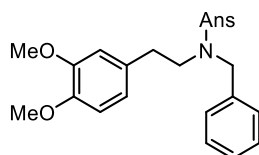

S1

**N-Benzyl-N-(3,4-dimethoxyphenethyl)-2-methoxybenzenesulfonamide S1.** Prepared according to general procedure V starting from 334  $\mu\text{mol}$  of **13o**. Yield: 83% (122 mg, 276  $\mu\text{mol}$ ). Solvent system for flash column chromatography: petroleum ether/EtOAc: 60/40; Brown oil; <sup>1</sup>H NMR (400 MHz, CDCl<sub>3</sub>):  $\delta$  8.00 (dd,  $J = 7.8$  and 1.7 Hz, 1H), 7.51 (ddd,  $J = 8.4$ , 7.5 and 1.8 Hz, 1H), 7.32-7.22 (m, 5H), 7.04 (td,  $J = 7.6$  and 0.9 Hz, 1H), 6.97 (dd,  $J = 8.4$  and 0.8 Hz, 1H), 6.69 (d,  $J = 8.3$  Hz, 1H), 6.49 (dd,  $J = 8.3$  and 2.0 Hz, 1H), 6.45 (d,  $J = 2.0$  Hz, 1H), 4.47 (s, 2H), 3.86 (s, 3H), 3.81 (s, 3H), 3.78 (s, 3H), 3.39-3.36 (m, 2H), 2.61-2.57 (m, 2H); <sup>13</sup>C NMR (100 MHz, CDCl<sub>3</sub>):  $\delta$  156.8, 148.9, 147.6, 137.0, 134.4, 131.4 (2C), 128.8, 128.6, 128.5, 127.7, 120.7, 120.4, 112.2, 112.0, 111.2, 56.0 (2C), 55.9, 52.1, 49.1, 34.8; IR (ATR):  $\nu_{\text{max}}$  2937, 2836, 1515, 1480, 1330, 1280, 1263, 1240, 1155, 1027, 804, 754, 733, 720, 701 cm<sup>-1</sup>; ESIHRMS  $m/z$  calcd for C<sub>24</sub>H<sub>28</sub>NO<sub>5</sub>S [M+H]<sup>+</sup> 442.1683, found 442.1680.

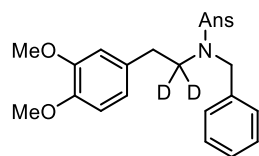S1<sub>d $\alpha$ 2</sub>

**N-Benzyl-N-[2-(3,4-dimethoxyphenyl)ethyl]-1,1-d<sub>2</sub>]-2-methoxybenzenesulfonamide S1<sub>d $\alpha$ 2</sub>.** Prepared according to general procedure V starting from 350  $\mu\text{mol}$  of **13o<sub>d $\alpha$ 2</sub>**. Yield: 56% (87 mg, 196  $\mu\text{mol}$ ). Solvent system for flash column chromatography: petroleum ether/EtOAc: 60/40; Brown oil; <sup>1</sup>H NMR (400 MHz, CDCl<sub>3</sub>):  $\delta$  8.00 (dd,  $J = 7.9$  and 1.8 Hz, 1H), 7.51 (ddd,  $J = 1.8$ , 7.5 and 8.3 Hz, 1H), 7.32-7.23 (m, 5H), 7.04 (td,  $J = 7.7$  and 1.0 Hz, 1H), 6.97 (dd,  $J = 8.4$  and 0.9 Hz, 1H), 6.69 (d,  $J = 8.3$  Hz, 1H), 6.49 (dd,  $J = 8.0$  and 2.0 Hz, 1H), 6.45 (d,  $J = 2.0$  Hz, 1H), 4.47 (s, 2H), 3.86 (s, 3H), 3.81 (s, 3H), 3.78 (s, 3H), 2.58 (s, 2H); <sup>13</sup>C NMR (100 MHz, CDCl<sub>3</sub>):  $\delta$  156.8, 148.9, 147.6, 137.0, 134.4, 131.4 (2C), 128.8, 128.6, 128.5, 127.7, 120.7, 120.4, 112.2, 112.0, 111.3, 56.0 (2C), 55.9, 52.0, 48.7-48.3 (m<sub>C-D</sub>), 34.6; IR (ATR):  $\nu_{\text{max}}$  2944, 2836, 2361, 1590, 1515, 1480, 1330, 1280, 1263, 1155, 1027, 866, 804, 759, 732, 700 cm<sup>-1</sup>.

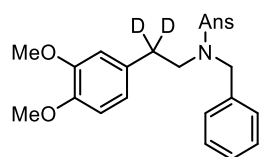S1<sub>d $\beta$ 2</sub>

**N-Benzyl-N-[2-(3,4-dimethoxyphenyl)ethyl]-2,2-d<sub>2</sub>]-2-methoxybenzenesulfonamide S1<sub>d $\beta$ 2</sub>.** Prepared according to general procedure V starting from 380  $\mu\text{mol}$  of **13o<sub>d $\beta$ 2</sub>**. Yield: 50% (84 mg, 189

μmol). Solvent system for the flash column chromatography: petroleum ether/EtOAc: 60/40; Brown oil;  $^1\text{H}$  NMR (400 MHz,  $\text{CDCl}_3$ ):  $\delta$  8.00 (d,  $J = 8.0$  Hz, 1H), 7.52 (app. t,  $J = 7.6$  Hz, 1H), 7.32-7.24 (m, 5H), 7.04 (app. t,  $J = 7.6$  Hz, 1H), 6.98 (d,  $J = 8.4$  Hz, 1H), 6.69 (d,  $J = 8.0$  Hz, 1H), 6.49 (app. d,  $J = 8.0$  Hz, 1H), 6.45-6.44 (m, 1H), 4.47 (s, 2H), 3.86 (s, 3H), 3.82 (s, 3H), 3.79 (s, 3H), 3.36 (s, 2H);  $^{13}\text{C}$  NMR (100 MHz,  $\text{CDCl}_3$ ):  $\delta$  156.8, 148.9, 147.6, 137.0, 134.4, 131.4, 131.3, 128.8, 128.6, 128.5, 127.8, 120.7, 120.4, 112.3, 112.0, 111.3, 56.0 (2C), 55.9, 52.2, 49.0, 34.5-33.8 ( $m_{\text{C-D}}$ ); IR (ATR):  $\nu_{\text{max}}$  2938, 2837, 1590, 1516, 1480, 1328, 1280, 1243, 1154, 1027, 805, 761, 701  $\text{cm}^{-1}$ .

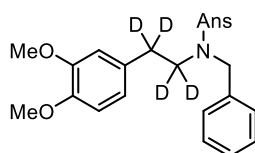S1<sub>dα2β2</sub>

**N-Benzyl-N-[2-(3,4-dimethoxyphenyl)ethyl]-1,1,2,2-d<sub>4</sub>]-2-methoxybenzenesulfonamide S1<sub>dα2β2</sub>.**

Prepared according to general procedure V starting from 470 μmol of **13o<sub>dα2β2</sub>**. Yield: 44% (92 mg, 207 μmol). Solvent system for the flash column chromatography: petroleum ether/EtOAc: 60/40; Brown oil;  $^1\text{H}$  (400 MHz,  $\text{CDCl}_3$ ):  $\delta$  7.99 (dd,  $J = 7.8$  and 1.7 Hz, 1H), 7.51 (ddd,  $J = 8.3$ , 7.5 and 1.7 Hz, 1H), 7.32-7.21 (m, 5H), 7.03 (td,  $J = 7.7$  and 1.0 Hz, 1H), 6.97 (d,  $J = 8.4$  Hz, 1H), 6.69 (d,  $J = 8.3$  Hz, 1H), 6.51-6.47 (m, 1H), 6.46-6.44 (m, 1H), 4.47 (s, 2H), 3.86 (s, 3H), 3.81 (s, 3H), 3.78 (s, 3H);  $^{13}\text{C}$  (100 Hz,  $\text{CDCl}_3$ ):  $\delta$  156.7, 148.9, 147.6, 137.0, 134.4, 131.3, 131.3, 128.8, 128.6, 128.4, 127.7, 120.6, 120.4, 112.2, 111.9, 111.2, 56.0 (2C), 55.9, 52.0, 48.7-47.9 ( $m_{\text{C-D}}$ ), 34.3-33.6 ( $m_{\text{C-D}}$ ); IR (ATR):  $\nu_{\text{max}}$  2939, 2837, 1590, 1515, 1480, 1329, 1280, 1244, 1155, 1072, 1027, 869, 804, 758, 731, 702  $\text{cm}^{-1}$ ; ESIHRMS  $m/z$  calcd for  $\text{C}_{24}\text{H}_{24}\text{D}_4\text{NO}_5\text{S}$   $[\text{M}+\text{H}]^+$  446.1934, found 446.1942.

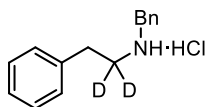S2<sub>dα2</sub>

**N-Benzyl-(2-phenylethyl-1,1-d<sub>2</sub>)amine hydrochloride S2<sub>dα2</sub>.** Prepared according to general procedure VI starting from 335 μmol of **13n<sub>dα2</sub>**. Yield: 75% (62 mg, 250 μmol); White solid;  $^1\text{H}$  (400 MHz,  $\text{CD}_3\text{OH}$ ):  $\delta$  8.90 (br. s, 1H), 7.55-7.51 (m, 2H), 7.46-7.42 (m, 3H), 7.33-7.22 (m, 5H), 4.23 (s, 2H), 3.03 (s, 2H);  $^{13}\text{C}$  (100 Hz,  $\text{CD}_3\text{OH}$ ):  $\delta$  137.7, 132.5, 130.9, 130.5, 130.1, 129.8, 129.6, 128.0, 52.3, 32.9, (1 C-D missing, obscured by the signal of  $\text{CD}_3\text{OH}$ ); ESIHRMS  $m/z$  calcd for  $\text{C}_{15}\text{H}_{16}\text{D}_2\text{N}$   $[\text{M}+\text{H}]^+$  214.1559, found 214.1558.

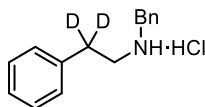S2<sub>dβ2</sub>

**N-Benzyl-(2-phenylethyl-2,2-d<sub>2</sub>)amine hydrochloride S2<sub>dβ2</sub>.** Prepared according to general procedure VI starting from 450 μmol of **13n<sub>dβ2</sub>**. Yield: 46% (52 mg, 207 μmol); White solid;  $^1\text{H}$  (400 MHz,  $\text{CD}_3\text{OH}$ ):  $\delta$  8.90 (br. s, 1H), 7.56-7.52 (m, 2H), 7.48-7.42 (m, 3H), 7.35-7.22 (m, 5H), 4.24 (s, 2H), 3.26 (s, 2H);  $^{13}\text{C}$  (100 Hz,  $\text{CD}_3\text{OH}$ ):  $\delta$  137.6, 132.5, 130.9, 130.5, 130.1, 129.8, 129.6, 128.1, 52.4, 49.6, 33.0-32.3 ( $m_{\text{C-D}}$ ); ESIHRMS  $m/z$  calcd for  $\text{C}_{15}\text{H}_{16}\text{D}_2\text{N}$   $[\text{M}+\text{H}]^+$  214.1559, found 214.1557.

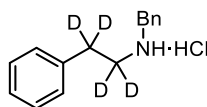**S2<sub>d $\alpha$ 2 $\beta$ 2</sub>**

**N-Benzyl-(2-phenylethyl-1,1,2,2-*d*<sub>4</sub>)amine hydrochloride S2<sub>d $\alpha$ 2 $\beta$ 2</sub>.** Prepared according to general procedure VI starting from 215  $\mu$ mol of **13n<sub>d $\alpha$ 2 $\beta$ 2</sub>**. Yield: 86% (40 mg, 186  $\mu$ mol); White solid; <sup>1</sup>H NMR (400 MHz, CD<sub>3</sub>OH):  $\delta$  7.54-7.50 (m, 2H), 7.47-7.42 (m, 3H), 7.34-7.22 (m, 5H), 4.22 (s, 2H); <sup>13</sup>C NMR (100 MHz, CD<sub>3</sub>OH):  $\delta$  137.6, 132.5, 130.9, 130.5, 130.1, 129.8, 129.6, 128.1, 52.3, 32.8-31.9 (m<sub>C-D</sub>), (1 C-D missing, obscured by the signal of CD<sub>3</sub>OH); ESIHRMS *m/z* calcd for C<sub>15</sub>H<sub>14</sub>D<sub>4</sub>N [M+H]<sup>+</sup> 216.1685, found 216.1683.

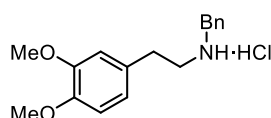**S3**

**N-Benzyl-2-(3,4-dimethoxyphenyl)ethan-1-amine hydrochloride S3.** Prepared according to general procedure VII starting from 450  $\mu$ mol of **S1**. Yield: 68% (94 mg, 305  $\mu$ mol); Pale yellow solid; Mp: 164 °C; <sup>1</sup>H NMR (400 MHz, CD<sub>3</sub>OH):  $\delta$  8.81 (br. s, 1H), 7.53-7.50 (m, 2H), 7.48-7.43 (m, 3H), 6.92-6.88 (m, 2H), 6.82 (dd, *J* = 8.0 and 2.0 Hz, 1H), 4.23 (br. s, 2H), 3.82 (s, 3H), 3.79 (s, 3H), 3.25 (br. s, 2H), 3.00-2.94 (m, 2H); <sup>13</sup>C NMR (100 MHz, CD<sub>3</sub>OH):  $\delta$  150.6, 149.6, 132.5, 130.9, 130.5, 130.4, 130.1, 122.0, 113.6, 113.3, 56.4 (2C), 52.4, 49.9, 32.7; IR (ATR):  $\nu_{\text{max}}$  3401, 2922, 2839, 2791, 2757, 2663, 2625, 2363, 2342, 1518, 1456, 1439, 1417, 1267, 1244, 1212, 1144, 1027, 797, 750, 697, 627, 609 cm<sup>-1</sup>; ESIHRMS *m/z* calcd for C<sub>17</sub>H<sub>22</sub>NO<sub>2</sub> [M+H]<sup>+</sup> 272.1645, found 272.1647.

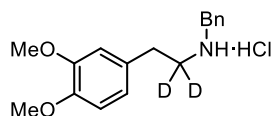**S3<sub>d $\alpha$ 2</sub>**

**N-Benzyl-2-(3,4-dimethoxyphenyl)ethan-1,1-*d*<sub>2</sub>-1-amine hydrochloride S3<sub>d $\alpha$ 2</sub>.** Prepared according to general procedure VII starting from 726  $\mu$ mol of **S1<sub>d $\alpha$ 2</sub>**. Yield: 67% (151 mg, 487  $\mu$ mol); Pale yellow solid; Mp: 170 °C; <sup>1</sup>H (400 MHz, CD<sub>3</sub>OH):  $\delta$  8.77 (br. s, 1H), 7.53-7.49 (m, 2H), 7.47-7.44 (m, 3H), 6.90 (d, *J* = 8.2 Hz, 1H), 6.88 (d, *J* = 2.1 Hz, 1H), 6.81 (dd, *J* = 8.2 and 2.1 Hz, 1H), 4.22 (t, *J* = 6.1 Hz, 2H), 3.82 (s, 3H), 3.80 (s, 3H), 2.95 (s, 2H); <sup>13</sup>C NMR (100 MHz, CD<sub>3</sub>OH):  $\delta$  150.7, 149.7, 132.5, 130.9, 130.6, 130.3, 130.2, 122.0, 113.5, 113.3, 56.4 (2C), 52.3, 32.5, (1 C-D missing); IR (ATR):  $\nu_{\text{max}}$  3410, 2937, 2839, 2760, 2672, 2626, 2363, 2342, 1591, 1519, 1457, 1440, 1423, 1264, 1240, 1159, 1144, 1027, 852, 806, 767, 750, 697, 625 cm<sup>-1</sup>; ESIHRMS *m/z* calcd for C<sub>17</sub>H<sub>20</sub>D<sub>2</sub>NO<sub>2</sub> [M+H]<sup>+</sup> 274.1771, found 274.1772.

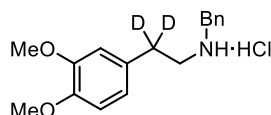**S3<sub>d $\beta$ 2</sub>**

**N-Benzyl-2-(3,4-dimethoxyphenyl)ethan-2,2-*d*<sub>2</sub>-1-amine hydrochloride S3<sub>d $\beta$ 2</sub>.** Prepared according to general procedure VII starting from 676  $\mu$ mol of **S1<sub>d $\beta$ 2</sub>**. Yield: 86% (179 mg, 578  $\mu$ mol); Pale yellow solid; <sup>1</sup>H NMR (400 MHz, CD<sub>3</sub>OH):  $\delta$  8.83 (br. s, 1H), 7.56-7.50 (m, 2H), 7.47-7.41 (m, 3H), 6.92-6.87 (m, 2H), 6.82 (dd, *J* = 8.3 and 2.0 Hz, 1H), 4.23 (br. t, *J* = 5.6 Hz, 2H), 3.81 (s, 3H), 3.78 (s, 3H), 3.25

(br. t,  $J = 5.5$  Hz, 2H);  $^{13}\text{C}$  NMR (100 MHz,  $\text{CD}_3\text{OH}$ ):  $\delta$  150.6, 149.6, 132.5, 130.9, 130.5, 130.3, 130.1, 122.0, 113.5, 113.3, 56.4 (2C), 52.4, 49.8, 32.6-31.8 ( $\text{m}_{\text{C-D}}$ ).

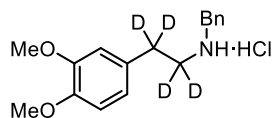**S3<sub>da2β2</sub>**

**N-Benzyl-2-(3,4-dimethoxyphenyl)ethan-1,1,2,2-*d*<sub>4</sub>-1-amine hydrochloride S3<sub>da2β2</sub>.** Prepared according to general procedure VII starting from 606  $\mu\text{mol}$  of **S1<sub>da2β2</sub>**. Yield: 54% (103 mg, 330  $\mu\text{mol}$ ); Brown solid;  $^1\text{H}$  NMR (400 MHz,  $\text{CD}_3\text{OH}$ ):  $\delta$  8.83 (br. s, 1H), 7.54-7.51 (m, 2H), 7.45-7.42 (m, 3H), 6.90-6.86 (m, 2H), 6.81 (dd,  $J = 8.0$  and 1.9 Hz, 1H), 4.22 (br. t,  $J = 6.0$  Hz, 2H), 3.80 (s, 3H), 3.77 (s, 3H);  $^{13}\text{C}$  NMR (100 MHz,  $\text{CD}_3\text{OH}$ ):  $\delta$  150.6, 149.5, 132.5, 130.9, 130.5, 130.3, 130.1, 122.0, 113.5, 113.2, 56.4 (2C), 52.3, 32.4-31.7 ( $\text{m}_{\text{C-D}}$ ), (1 C-D missing); IR (ATR):  $\nu_{\text{max}}$  3401, 2922, 2839, 2791, 2757, 2663, 2625, 2363, 2342, 1518, 1455, 1439, 1417, 1267, 1244, 1212, 1144, 1027, 797, 749, 697, 627, 609  $\text{cm}^{-1}$ ; ESIHRMS  $m/z$  calcd for  $\text{C}_{17}\text{H}_{18}\text{D}_4\text{NO}_2$   $[\text{M}+\text{H}]^+$  276.1896, found 276.1901.

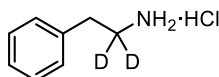**17<sub>da2</sub>**

**(2-Phenylethyl-1,1-*d*<sub>2</sub>)amine hydrochloride 17<sub>da2</sub>.** Prepared according to general procedure VIII starting from 249  $\mu\text{mol}$  of **S2<sub>da2</sub>**. Yield: 63% (25 mg, 156  $\mu\text{mol}$ ),  $\alpha$  deuteration: >99% (calculated by integration of the residual signal in the  $^1\text{H}$  NMR spectra); White solid;  $^1\text{H}$  NMR (400 MHz,  $\text{CD}_3\text{OH}$ ):  $\delta$  7.35-7.30 (m, 2H), 7.29-7.22 (m, 3H), 2.94 (s, 2H);  $^{13}\text{C}$  NMR (100 MHz,  $\text{CD}_3\text{OH}$ ):  $\delta$  138.1, 129.8, 129.7, 128.0, 42.0-41.3 ( $\text{m}_{\text{C-D}}$ ), 34.7; IR (ATR):  $\nu_{\text{max}}$  3405, 3025, 2991, 1637, 1229, 900, 742, 697, 655  $\text{cm}^{-1}$ ; ESIHRMS  $m/z$  calcd for  $\text{C}_8\text{H}_{10}\text{D}_2\text{N}$   $[\text{M}+\text{H}]^+$  124.1090 found 124.1096.

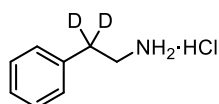**17<sub>dβ2</sub>**

**(2-Phenylethyl-2,2-*d*<sub>2</sub>)amine hydrochloride 17<sub>dβ2</sub>.** Prepared according to general procedure VIII starting from 206  $\mu\text{mol}$  of **S2<sub>dβ2</sub>**. Yield: 91% (30 mg, 188  $\mu\text{mol}$ ),  $\beta$  deuteration: 84% (calculated by integration of the residual signal in the  $^1\text{H}$  NMR spectra); White solid;  $^1\text{H}$  NMR (400 MHz,  $\text{CD}_3\text{OH}$ ):  $\delta$  7.36-7.31 (m, 2H), 7.29-7.24 (m, 3H), 3.14 (obs. s, 2H);  $^{13}\text{C}$  NMR (100 MHz,  $\text{CD}_3\text{OH}$ ):  $\delta$  137.9, 129.8, 129.6, 128.0, 42.1, 34.7-34.0 ( $\text{m}_{\text{C-D}}$ ); IR (ATR):  $\nu_{\text{max}}$  3438, 3406, 3025, 2991, 1602, 1511, 1497, 1464, 1385, 1148, 927, 785, 736, 695  $\text{cm}^{-1}$ ; ESIHRMS  $m/z$  calcd for  $\text{C}_8\text{H}_{10}\text{D}_2\text{N}$   $[\text{M}+\text{H}]^+$  124.1090 found 124.1095.

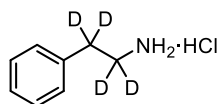**17<sub>da2β2</sub>**

**(2-Phenylethyl-1,1,2,2-*d*<sub>4</sub>)amine hydrochloride 17<sub>da2β2</sub>.** Prepared according to general procedure VIII starting from 159  $\mu\text{mol}$  of **S2<sub>da2β2</sub>**. Yield: 85% (22 mg, 136  $\mu\text{mol}$ ),  $\alpha$  and  $\beta$  deuteration: >99% and 95% (calculated by integration of the residual signals in the  $^1\text{H}$  NMR spectra); White solid;  $^1\text{H}$  NMR (400 MHz,

CD<sub>3</sub>OH):  $\delta$  7.36-7.31 (m, 2H), 7.29-7.23 (m, 3H); <sup>13</sup>C NMR (100 MHz, CD<sub>3</sub>OH):  $\delta$  137.9, 129.8, 129.6, 128.0, 42.0-41.3 (m<sub>C-D</sub>), 34.3-33.7 (m<sub>C-D</sub>); IR (ATR):  $\nu_{\max}$  3419, 3025, 2980, 2928, 1602, 1513, 1467, 1449, 1227, 1177, 1075, 904, 875, 649, 618, 607 cm<sup>-1</sup>; ESIHRMS *m/z* calcd for C<sub>8</sub>H<sub>8</sub>D<sub>4</sub>N [M+H]<sup>+</sup> 126.1215 found 126.1221.

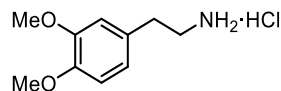

S4

**2-(3,4-Dimethoxyphenyl)ethanamine hydrochloride S4.** Prepared according to general procedure VIII starting from 305  $\mu$ mol of **S3**. Yield: 89% (59 mg, 271  $\mu$ mol); Pale yellow solid, Mp: 128 °C; <sup>1</sup>H NMR (400 MHz, CD<sub>3</sub>OH):  $\delta$  6.92-6.89 (m, 2H), 6.83 (dd, *J* = 8.4 and 2.4 Hz, 1H), 3.83 (s, 3H), 3.80 (s, 3H), 3.17 (app. t, *J* = 7.2 Hz, 2H), 2.92 (app. t, *J* = 8.0 Hz, 2H); <sup>13</sup>C NMR (100 MHz, CD<sub>3</sub>OH):  $\delta$  150.5, 149.4, 130.6, 122.1, 113.5, 113.2, 56.4 (2C), 42.3, 34.1; IR (ATR):  $\nu_{\max}$  3404, 2937, 2362, 2341, 1634, 1595, 1518, 1466, 1422, 1265, 1236, 1157, 1144, 1024, 867, 808, 765, 667, 631 cm<sup>-1</sup>; ESIHRMS *m/z* calcd for C<sub>10</sub>H<sub>16</sub>NO<sub>2</sub> [M+H]<sup>+</sup> 182.1176 found 182.1169. This compound has been previously reported.<sup>S11</sup>

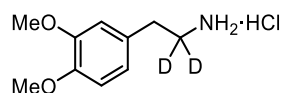S4<sub>d $\alpha$ 2</sub>

**2-(3,4-Dimethoxyphenyl)ethan-1,1-d<sub>2</sub>-1-amine hydrochloride S4<sub>d $\alpha$ 2</sub>.** Prepared according to general procedure VIII starting from 468  $\mu$ mol of **S3<sub>d $\alpha$ 2</sub>**. Yield: 97% (100 mg, 455  $\mu$ mol); Pale yellow solid; Mp: 125 °C; <sup>1</sup>H NMR (400 MHz, CD<sub>3</sub>OH):  $\delta$  6.91-6.88 (m, 2H), 6.82 (dd, *J* = 8.2 and 2.0 Hz, 1H), 3.82 (s, 3H), 3.79 (s, 3H), 2.90 (s, 2H); <sup>13</sup>C NMR (100 MHz, CD<sub>3</sub>OH):  $\delta$  150.5, 149.4, 130.6, 122.1, 113.5, 113.2, 56.4 (2C), 42.1-41.3 (m<sub>C-D</sub>), 34.0; IR (ATR):  $\nu_{\max}$  3416, 3396, 2942, 2840, 1612, 1517, 1265, 1235, 1157, 1143, 1024, 811, 764, 655, 620 cm<sup>-1</sup>; ESIHRMS *m/z* calcd for C<sub>10</sub>H<sub>14</sub>D<sub>2</sub>NO<sub>2</sub> [M+H]<sup>+</sup>, 184.1301 found 183.1299.

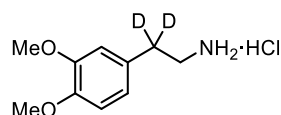S4<sub>d $\beta$ 2</sub>

**2-(3,4-Dimethoxyphenyl)ethan-2,2-d<sub>2</sub>-1-amine hydrochloride S4<sub>d $\beta$ 2</sub>.** Prepared according to general procedure VIII starting from 548  $\mu$ mol of **S3<sub>d $\beta$ 2</sub>**. Yield: 90% (108 mg, 492  $\mu$ mol); White solid; Mp: 124 °C; <sup>1</sup>H NMR (400 MHz, CD<sub>3</sub>OH):  $\delta$  6.91-6.87 (m, 2H), 6.82 (dd, *J* = 8.2 and 2.0 Hz, 1H), 3.82 (s, 3H), 3.78 (s, 3H), 3.16 (obs. s, 2H); <sup>13</sup>C NMR (100 MHz, CD<sub>3</sub>OH):  $\delta$  150.5, 149.4, 130.6, 122.1, 113.5, 113.2, 56.4 (2C), 42.2, 34.2-33.1 (m<sub>C-D</sub>); IR (ATR):  $\nu_{\max}$  3394, 2944, 1614, 1518, 1466, 1265, 1244, 1172, 1143, 1023, 805, 765, 629 cm<sup>-1</sup>.

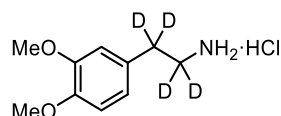S4<sub>d $\alpha$ 2 $\beta$ 2</sub>

**2-(3,4-Dimethoxyphenyl)ethan-1,1,2,2-d<sub>4</sub>-1-amine hydrochloride S4<sub>d $\alpha$ 2 $\beta$ 2</sub>.** Prepared according to general procedure VIII starting from 321  $\mu$ mol of **S3<sub>d $\alpha$ 2 $\beta$ 2</sub>**. Yield: 80% (57 mg, 257  $\mu$ mol); Pale yellow solid; Mp: 124 °C; <sup>1</sup>H NMR (400 MHz, CD<sub>3</sub>OH):  $\delta$  6.92-6.89 (m, 2H), 6.82 (dd, *J* = 8.0 and 2.0 Hz, 1H),

3.83 (s, 3H), 3.79 (s, 3H);  $^{13}\text{C}$  NMR (100 MHz,  $\text{CD}_3\text{OH}$ ):  $\delta$  150.5, 149.4, 130.6, 122.1, 113.5, 113.2, 56.4 (2C), 42.1-41.3 ( $m_{\text{C-D}}$ ), 34.0-33.0 ( $m_{\text{C-D}}$ ); IR (ATR):  $\nu_{\text{max}}$  3409, 2995, 2941, 2836, 1609, 1590, 1516, 1465, 1415, 1264, 1243, 1208, 1168, 1142, 1026, 804, 763  $\text{cm}^{-1}$ ; ESIHRMS  $m/z$  calcd for  $\text{C}_{10}\text{H}_{12}\text{D}_4\text{NO}_2$   $[\text{M}+\text{H}]^+$ , 186.1427 found 186.1429.

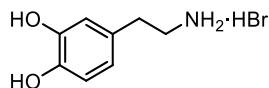

19

**2-(3,4-Dihydroxyphenyl)ethylamine hydrobromide 19.** Prepared according to general procedure IX starting from 921  $\mu\text{mol}$  of **S4**. Yield: 97% (210 mg, 897  $\mu\text{mol}$ ); Brown solid; Mp: 130  $^\circ\text{C}$ ;  $^1\text{H}$  NMR (400 MHz,  $\text{CD}_3\text{OD}$ ):  $\delta$  6.77-6.73 (m, 2H), 6.61 (dd,  $J = 8.0$  and 2.0 Hz, 1H), 3.12 (t,  $J = 7.6$  Hz, 2H), 2.83 (t,  $J = 8.0$  Hz, 2H),  $^{13}\text{C}$  NMR (100 MHz,  $\text{CD}_3\text{OD}$ ):  $\delta$  146.5, 145.4, 129.3, 121.1, 116.8, 116.7, 42.2, 33.8; IR (ATR):  $\nu_{\text{max}}$  3370, 3031, 2505, 2421, 1516, 1282, 1187, 1153, 1128, 1120, 1060, 974, 934, 875, 807, 780  $\text{cm}^{-1}$ .

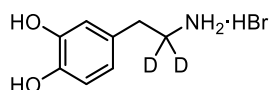19<sub>d $\alpha$ 2</sub>

**2-(3,4-Dihydroxyphenyl)ethyl-1,1-d<sub>2</sub>-amine hydrobromide 19<sub>d $\alpha$ 2</sub>.** Prepared according to general procedure IX starting from 1.46 mmol of **S4<sub>d $\alpha$ 2</sub>**. Yield: quant. (343 mg, 1.45 mmol),  $\alpha$  deuteration: 99% (calculated by integration of the residual signal in the  $^1\text{H}$  NMR spectra); Brown solid;  $^1\text{H}$  NMR (400 MHz,  $\text{CD}_3\text{OD}$ ):  $\delta$  6.79-6.74 (m, 2H), 6.62 (dd,  $J = 8.0$  and 2.0 Hz, 1H), 2.83 (s, 2H);  $^{13}\text{C}$  NMR (100 MHz,  $\text{CD}_3\text{OD}$ ):  $\delta$  146.4, 145.3, 129.3, 121.2, 116.8, 116.7, 42.0-41.4 ( $m_{\text{C-D}}$ ), 33.6; IR (ATR):  $\nu_{\text{max}}$  3419, 3062, 3033, 2952, 2277, 1626, 1528, 1450, 1362, 1288, 1188, 1118, 954, 865, 812, 783, 610  $\text{cm}^{-1}$ ; ESIHRMS  $m/z$  calcd for  $\text{C}_8\text{H}_{10}\text{D}_2\text{NO}_2$   $[\text{M}+\text{H}]^+$  156.0988, found 156.0992.

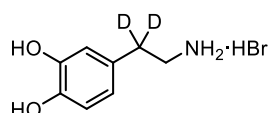19<sub>d $\beta$ 2</sub>

**2-(3,4-Dihydroxyphenyl)ethyl-2,2-d<sub>2</sub>-amine hydrobromide 19<sub>d $\beta$ 2</sub>.** Prepared according to general procedure IX starting from 450  $\mu\text{mol}$  of **S4<sub>d $\beta$ 2</sub>**. Yield: quant. (107 mg, 453  $\mu\text{mol}$ ),  $\beta$  deuteration: 87% (calculated by integration of the residual signal in the  $^1\text{H}$  NMR spectra); Brown solid;  $^1\text{H}$  NMR (400 MHz,  $\text{CD}_3\text{OD}$ ):  $\delta$  6.79-6.75 (m, 2H), 6.61 (dd,  $J = 8.0$  and 2.4 Hz, 1H), 3.11 (s, 2H);  $^{13}\text{C}$  NMR (100 MHz,  $\text{CD}_3\text{OD}$ ):  $\delta$  146.4, 145.2, 129.3, 121.2, 116.8, 116.7, 42.1, 33.8-32.8 ( $m_{\text{C-D}}$ ); IR (ATR):  $\nu_{\text{max}}$  3400, 3065, 2950, 2530, 2315, 1629, 1527, 1439, 1285, 1180, 1121, 959, 869, 812, 783  $\text{cm}^{-1}$ ; ESIHRMS  $m/z$  calcd for  $\text{C}_8\text{H}_{10}\text{D}_2\text{NO}_2$   $[\text{M}+\text{H}]^+$  156.0988, found 156.0992.

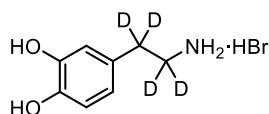19<sub>d $\alpha$ 2 $\beta$ 2</sub>

**2-(Dihydroxyphenyl)ethyl-1,1,2,2-d<sub>4</sub>-amine hydrobromide 19<sub>d $\alpha$ 2 $\beta$ 2</sub>.** Prepared according to general procedure IX starting from 262  $\mu\text{mol}$  of **S4<sub>d $\alpha$ 2 $\beta$ 2</sub>**. Yield: quant. (63 mg, 265  $\mu\text{mol}$ ),  $\alpha$  and  $\beta$  deuteration: 99% and 91% (calculated by integration of the residual signals in the  $^1\text{H}$  NMR spectra); Brown solid;  $^1\text{H}$

NMR (400 MHz, CD<sub>3</sub>OD):  $\delta$  6.79-6.77 (m, 2H), 6.62 (dd,  $J$  = 8.0 and 2.0 Hz, 1H); <sup>13</sup>C NMR (100 MHz, CD<sub>3</sub>OD):  $\delta$  146.1, 144.9, 129.3, 121.2, 116.7, 116.6, 42.0-41.2 (m<sub>C-D</sub>), 33.0-32.2 (m<sub>C-D</sub>); IR (ATR):  $\nu_{\text{max}}$  3392, 3028, 2991, 1637, 1528, 1439, 1179, 1121, 604 cm<sup>-1</sup>; ESIHRMS  $m/z$  calcd for C<sub>8</sub>H<sub>8</sub>D<sub>4</sub>NO<sub>2</sub> [M+H]<sup>+</sup> 158.1114, found 158.1114.



## Experimental Procedure and Characterization Data: Reduction/Reductive Deuteration of Ynol Ethers

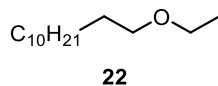

**1-Ethoxydodecane 22.** To a vigorously stirred solution of 1-ethoxydodec-1-yne **21** (197 mg, 936  $\mu\text{mol}$ ) in dichloromethane (3.5 mL) under an argon atmosphere was added triethylsilane (745  $\mu\text{L}$ , 4.68 mmol). Trifluoromethanesulfonic acid (205  $\mu\text{L}$ , 2.34 mmol) was then added dropwise at 0 °C and the mixture was stirred at rt overnight. The resulting reaction mixture was then poured into a 1M aqueous solution of NaOH. The layers were separated and the aqueous layer was extracted with dichloromethane (2x). Combined organic layers were dried over  $\text{MgSO}_4$ , filtered and concentrated. The crude reaction mixture was diluted in a 1:1:1 mixture of tetrahydrofuran, methanol and water (3.5 mL) before lithium hydroxide (112 mg, 4.66 mmol) was added. The resulting mixture was stirred at rt for 5 hours before being quenched by addition of a 1M aqueous solution of NaOH. The layers were separated, the aqueous layer was extracted with EtOAc (2x) and the combined organic layers were washed with brine, dried over  $\text{MgSO}_4$ , filtered and concentrated under reduced pressure. The crude product was finally purified by flash column chromatography (petroleum ether) to afford the desired ether as a colorless oil. Yield: 40% (80 mg, 376  $\mu\text{mol}$ ).  $^1\text{H}$  NMR (400 MHz,  $\text{CDCl}_3$ ):  $\delta$  3.46 (q,  $J = 6.8$  Hz, 2H), 3.40 (t,  $J = 6.8$  Hz, 2H), 1.60-1.53 (m, 2H), 1.34-1.23 (m, 18H), 1.20 (t,  $J = 7.0$  Hz, 3H), 0.88 (t,  $J = 7.2$  Hz, 3H);  $^{13}\text{C}$  NMR (100 MHz,  $\text{CDCl}_3$ ):  $\delta$  71.0, 66.2, 32.1, 30.0, 29.8, 29.8, 29.8 (2C), 29.7, 29.5, 26.4, 22.8, 15.4, 14.3. This compound has been previously reported.<sup>S12</sup>

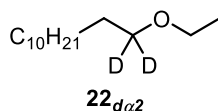

**1-Ethoxydodecane-1,1- $d_2$  22<sub>da2</sub>.** To a vigorously stirred solution of 1-ethoxydodec-1-yne **21** (180 mg, 855  $\mu\text{mol}$ ) in dichloromethane (3.2 mL) under an argon atmosphere was added triethyl(silane- $d$ ) (690  $\mu\text{L}$ , 4.28 mmol). Trifluoromethanesulfonic acid (190  $\mu\text{L}$ , 2.14 mmol) was then added dropwise at 0 °C and the mixture was stirred at rt overnight. The resulting reaction mixture was then poured into a 1M aqueous solution of NaOH. The layers were separated and the aqueous layer was extracted with dichloromethane (2x). Combined organic layers were dried over  $\text{MgSO}_4$ , filtered and concentrated. The crude reaction mixture was diluted in a 1:1:1 mixture of tetrahydrofuran, methanol and water (3.2 mL) before lithium hydroxide (102 mg, 4.28 mmol) was added. The resulting mixture was stirred at rt for 5 hours before being quenched by addition of a 1M aqueous solution of NaOH. The layers were separated, the aqueous layer was extracted with EtOAc (2x) and the combined organic layers were washed with brine, dried over  $\text{MgSO}_4$ , filtered and concentrated under reduced pressure. The crude product was finally purified by flash column chromatography (petroleum ether) to afford the desired  $\alpha,\alpha$ -deuterated ether as a colorless oil. Yield: 27% (50 mg, 231  $\mu\text{mol}$ ),  $\alpha$  deuteration: 92% (calculated by integration of the residual signal in the  $^1\text{H}$  NMR spectra).  $^1\text{H}$  NMR (400 MHz,  $\text{CDCl}_3$ ):  $\delta$  3.46 (q,  $J = 7.0$  Hz, 2H), 1.57-1.53 (m, 2H), 1.35-1.25 (m, 18H), 1.20 (t,  $J = 7.2$  Hz, 3H), 0.87 (t,  $J = 6.8$  Hz, 3H);  $^{13}\text{C}$  NMR (100 MHz,  $\text{CDCl}_3$ ):  $\delta$  70.4-69.9 ( $m_{\text{C-D}}$ ), 66.1, 32.1, 29.8, 29.8, 29.8 (3C), 29.7, 29.5, 26.3, 22.8, 15.4, 14.3; IR (ATR):  $\nu_{\text{max}}$  2957, 2924, 2854, 1466, 1393, 1379, 1180, 1158, 1118, 721  $\text{cm}^{-1}$ .

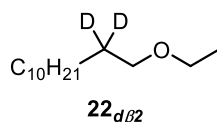

**1-Ethoxydodecane-2,2-*d*<sub>2</sub> 22<sub>dβ2</sub>.** To a vigorously stirred solution of 1-ethoxydodec-1-yne **21** (97 mg, 461 μmol) in dichloromethane (1.8 mL) under an argon atmosphere was added triethylsilane (370 μL, 2.31 mmol). Freshly prepared trifluoromethanesulfonic acid-*d* (100 μL, 1.15 mmol) was then added dropwise at 0 °C and the mixture was stirred at rt overnight. The resulting reaction mixture was then poured into a 1M aqueous solution of NaOH. The layers were separated and the aqueous layer was extracted with dichloromethane (2x). Combined organic layers were dried over MgSO<sub>4</sub>, filtered and concentrated. The crude reaction mixture was diluted in a 1:1:1 mixture of tetrahydrofuran, methanol and water (1.8 mL) before lithium hydroxide (57 mg, 2.40 mmol) was added. The resulting mixture was stirred at rt for 5 hours before being quenched by addition of a 1M aqueous solution of NaOH. The layers were separated, the aqueous layer was extracted with EtOAc (2x) and the combined organic layers were washed with brine, dried over MgSO<sub>4</sub>, filtered and concentrated under reduced pressure. The crude product was finally purified by flash column chromatography (petroleum ether) to afford the desired β,β-deuterated ether as a colorless oil. Yield: 44% (44 mg, 203 μmol), β deuteration: 86% (calculated by integration of the residual signal in the <sup>1</sup>H NMR spectra). <sup>1</sup>H NMR (400 MHz, CDCl<sub>3</sub>): δ 3.46 (q, *J* = 7.0 Hz, 2H), 1.57-1.53 (m, 2H), 1.35-1.25 (m, 18H), 1.20 (t, *J* = 7.2 Hz, 3H), 0.87 (t, *J* = 6.8 Hz, 3H); <sup>13</sup>C NMR (100 MHz, CDCl<sub>3</sub>): δ 70.8, 66.2, 32.1, 29.8, 29.8, 29.8 (2C), 29.6, 29.5, 26.2, 22.8, 15.4, 14.2 (1 C-D missing); IR (ATR): ν<sub>max</sub> 2957, 2924, 2854, 1466, 1376, 1352, 1119, 721 cm<sup>-1</sup>.

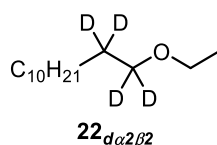

**1-Ethoxydodecane-1,1,2,2-*d*<sub>4</sub> 22<sub>dα2β2</sub>.** To a vigorously stirred solution of 1-ethoxydodec-1-yne **21** (178 mg, 847 μmol) in dichloromethane (3.1 mL) under an argon atmosphere was added triethyl(silane-*d*) (680 μL, 4.24 mmol). Trifluoromethanesulfonic acid-*d* (190 μL, 2.12 mmol) was then added dropwise at 0 °C and the mixture was stirred at rt overnight. The resulting reaction mixture was then poured into a 1M aqueous solution of NaOH. The layers were separated and the aqueous layer was extracted with dichloromethane (2x). Combined organic layers were dried over MgSO<sub>4</sub>, filtered and concentrated. The crude reaction mixture was diluted in a 1:1:1 mixture of tetrahydrofuran, methanol and water (3.1 mL) before lithium hydroxide (101 mg, 4.24 mmol) was added. The resulting mixture was stirred at rt for 5 hours before being quenched by addition of a 1M aqueous solution of NaOH. The layers were separated, the aqueous layer was extracted with EtOAc (2x) and the combined organic layers were washed with brine, dried over MgSO<sub>4</sub>, filtered and concentrated under reduced pressure. The crude product was finally purified by flash column chromatography (petroleum ether) to afford the desired α,α,β,β-deuterated ether as a colorless oil. Yield: 27% (50 mg, 229 μmol), α and β deuteration: 98% and 62% (calculated by integration of the residual signals in the <sup>1</sup>H NMR spectra). <sup>1</sup>H NMR (400 MHz, CDCl<sub>3</sub>): δ 3.46 (q, *J* = 7.2 Hz, 2H), 1.31-1.25 (m, 18H), 1.20 (t, *J* = 7.0 Hz, 3H), 0.88 (t, *J* = 7.0 Hz, 3H); <sup>13</sup>C NMR (100 MHz, CDCl<sub>3</sub>): δ 66.1, 32.1, 29.8, 29.8, 29.8 (2C), 29.6, 29.5, 26.1, 22.8, 15.4, 14.3 (2 C-D missing); IR (ATR): ν<sub>max</sub> 2957, 2924, 2855, 1466, 1394, 1379, 1134, 1084, 997, 770, 721.

*Supporting Information*

**$^1\text{H}$  and  $^{13}\text{C}$  NMR Spectra**

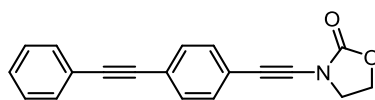

9c

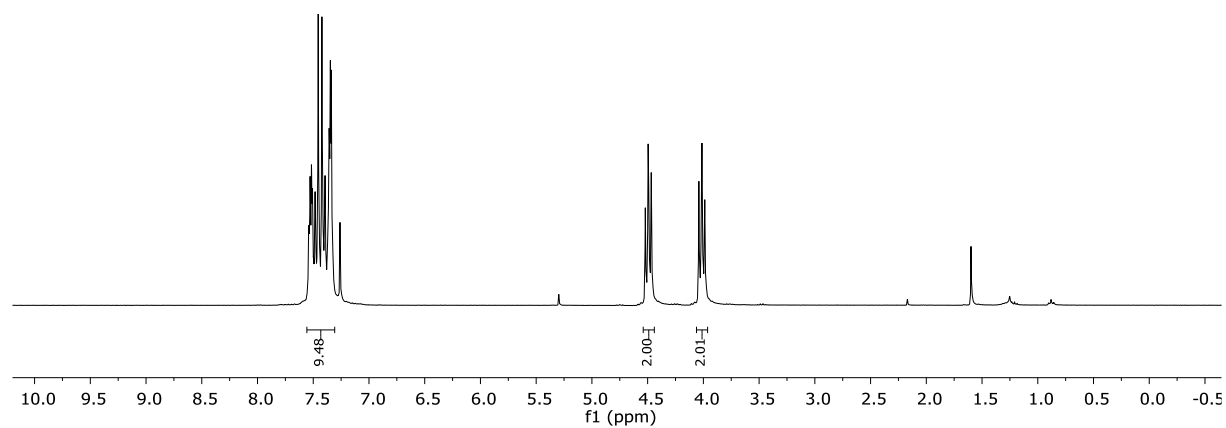

Figure S1. <sup>1</sup>H NMR spectrum of 9c.

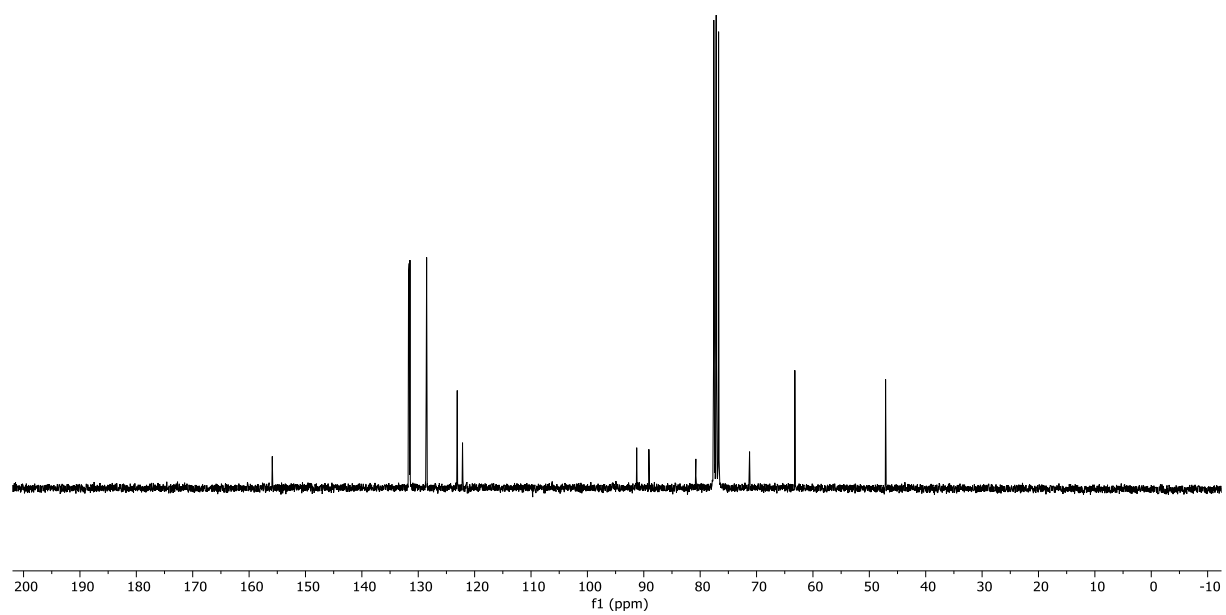

Figure S2. <sup>13</sup>C NMR spectrum of 9c.

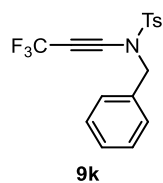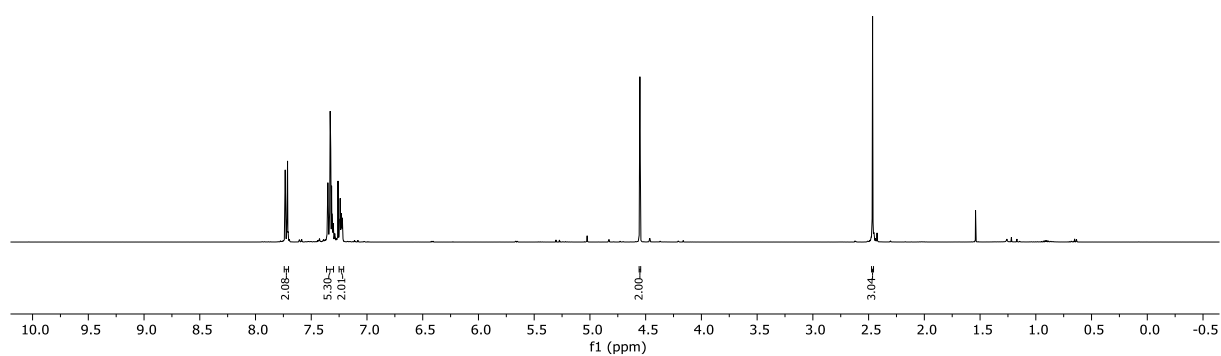

Figure S3. <sup>1</sup>H NMR spectrum of **9k**.

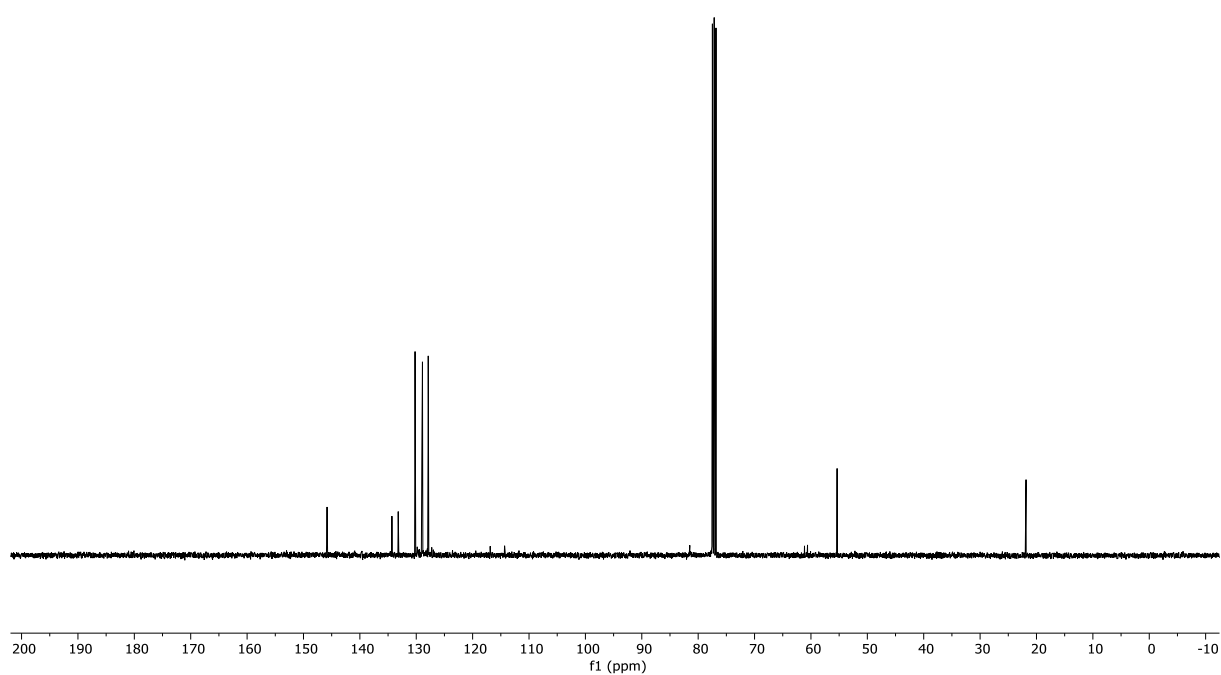

Figure S4. <sup>13</sup>C NMR spectrum of **9k**.

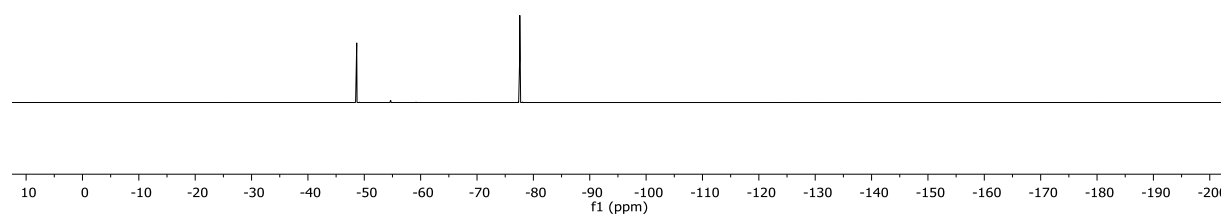

**Figure S5.**  $^{19}\text{F}$  NMR spectrum of **9k**.

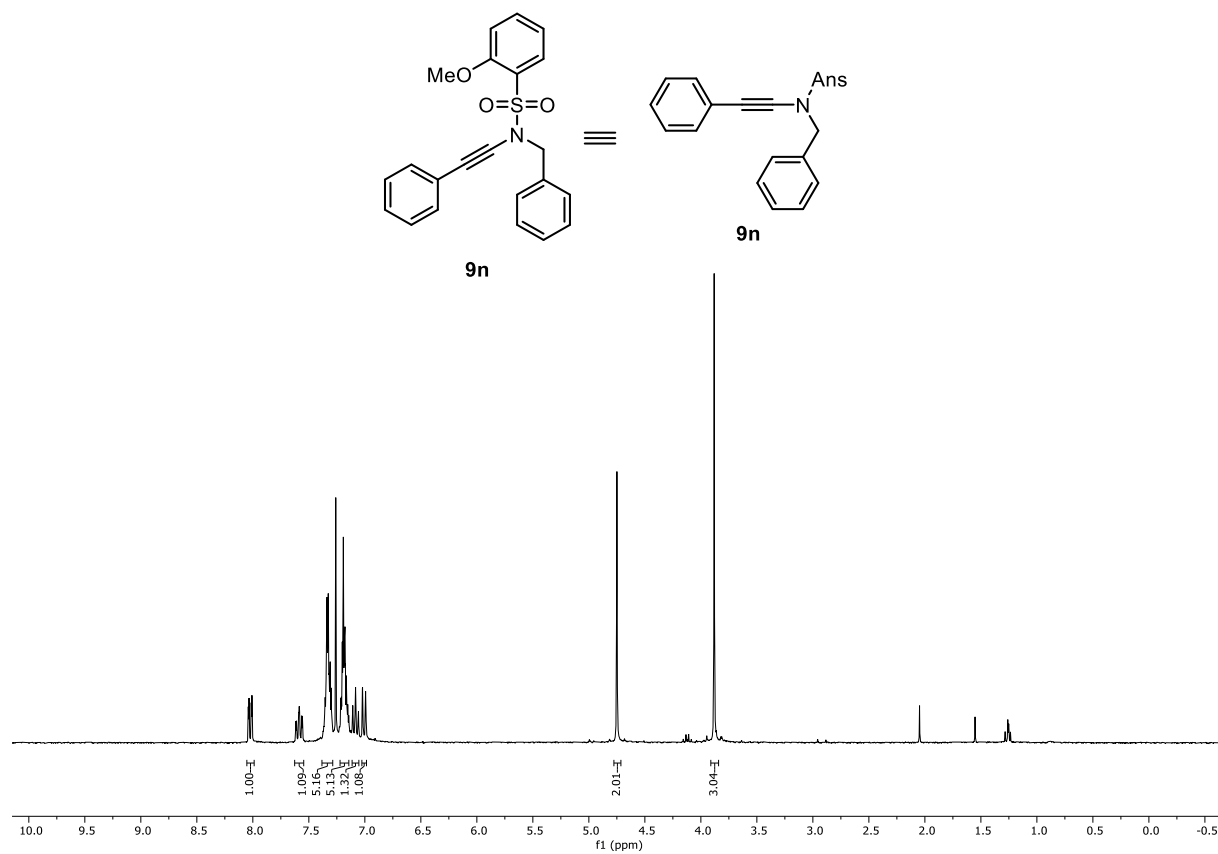

Figure S6. <sup>1</sup>H NMR spectrum of 9n.

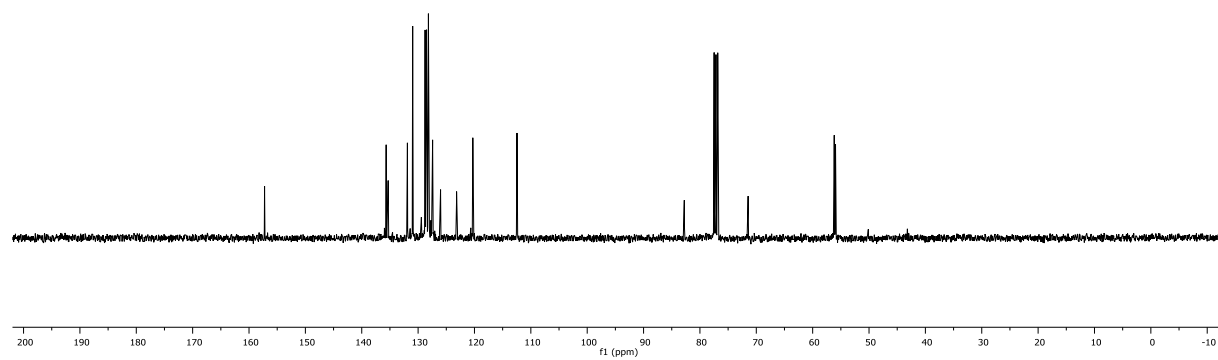

Figure S7. <sup>13</sup>C NMR spectrum of 9n.

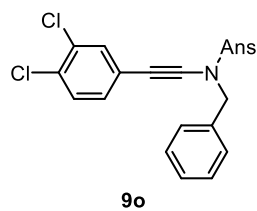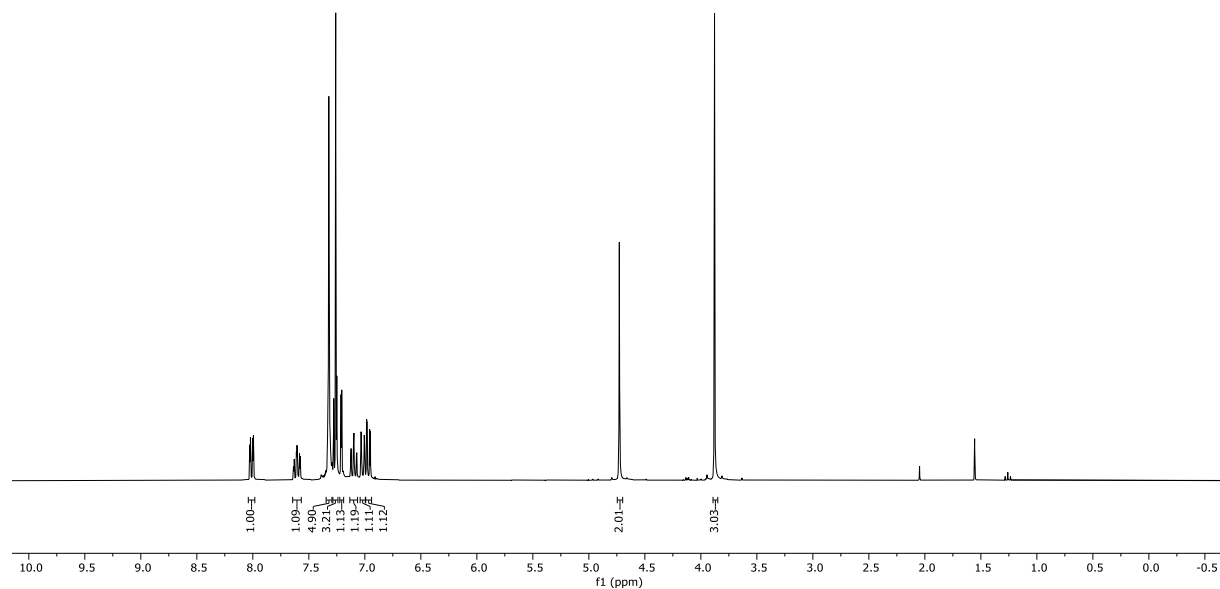

Figure S8. <sup>1</sup>H NMR spectrum of **9o**.

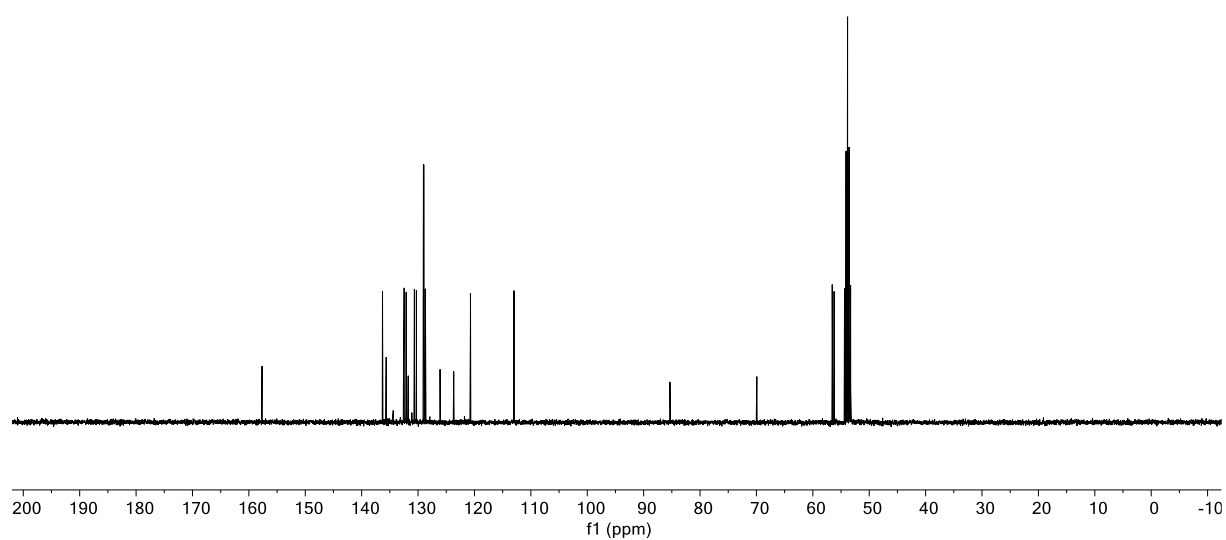

Figure S9. <sup>13</sup>C NMR spectrum of **9o**.



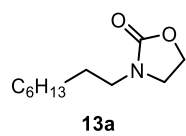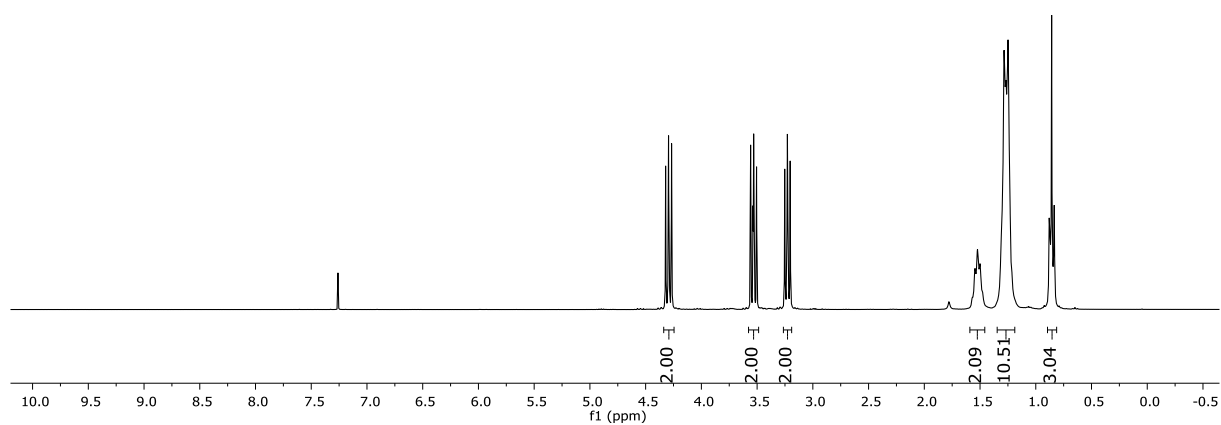

Figure S10.  $^1\text{H}$  NMR spectrum of **13a**.

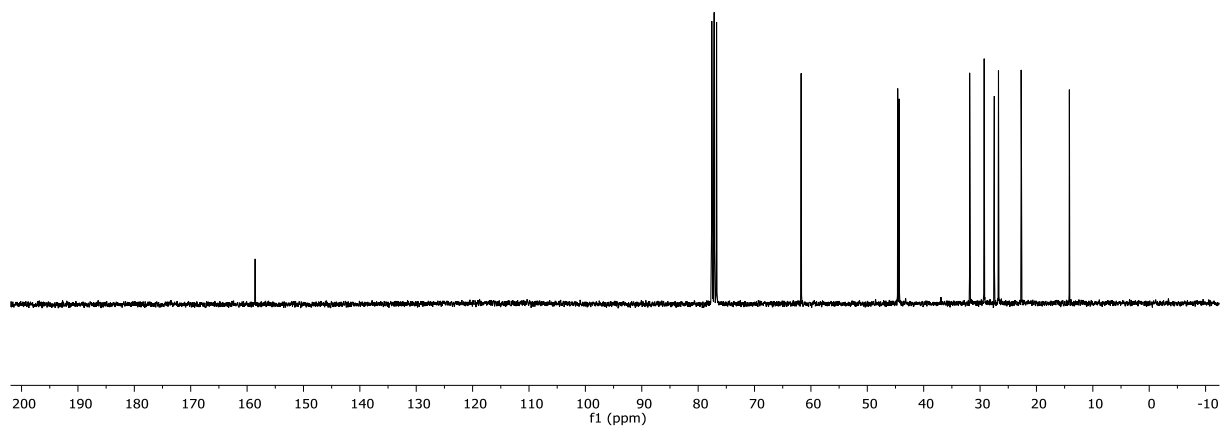

Figure S11.  $^{13}\text{C}$  NMR spectrum of **13a**.

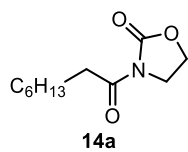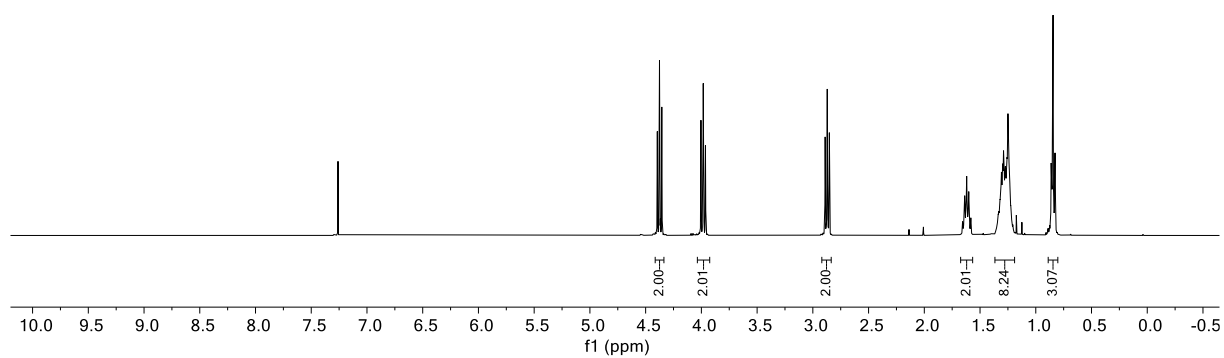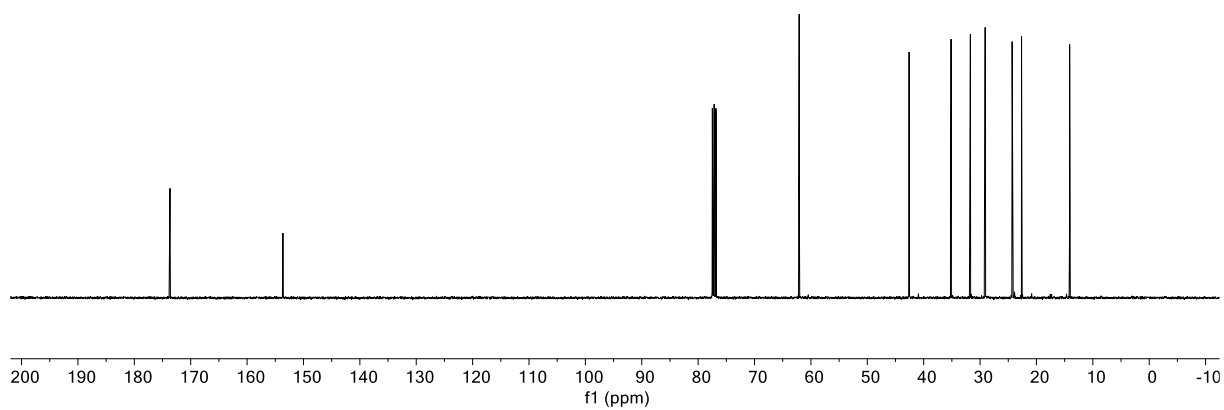

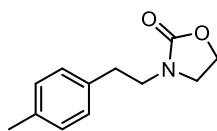

**13b**

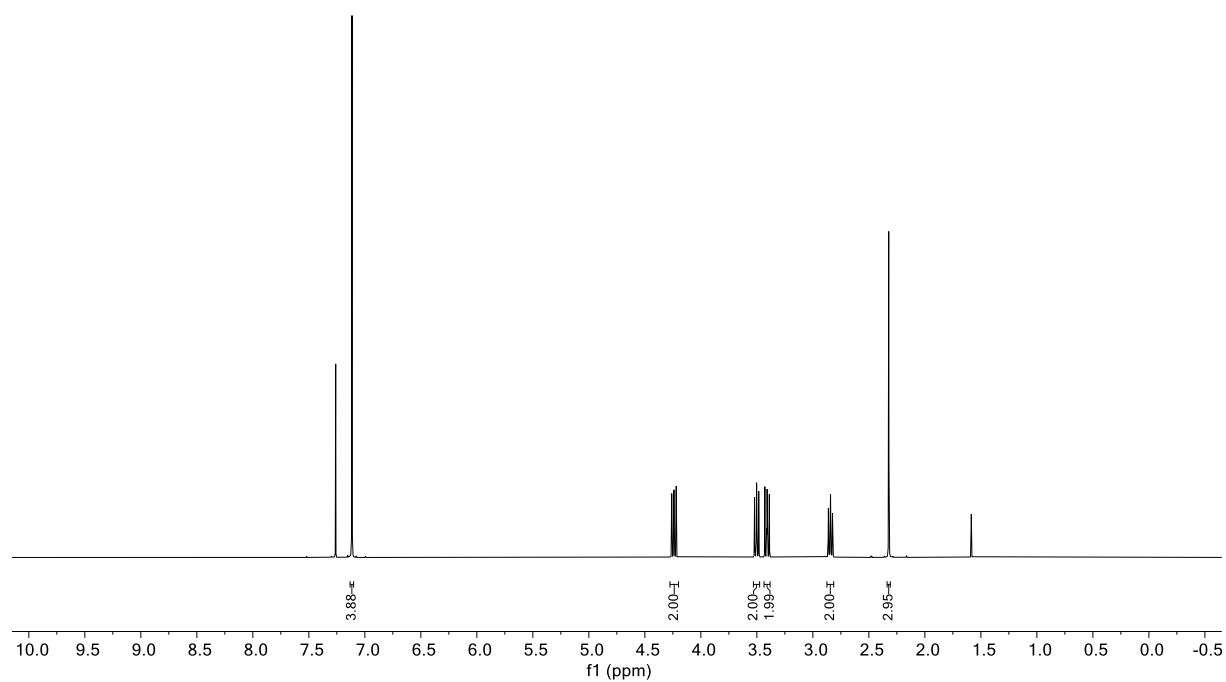

**Figure S14.** <sup>1</sup>H NMR spectrum of 13b.

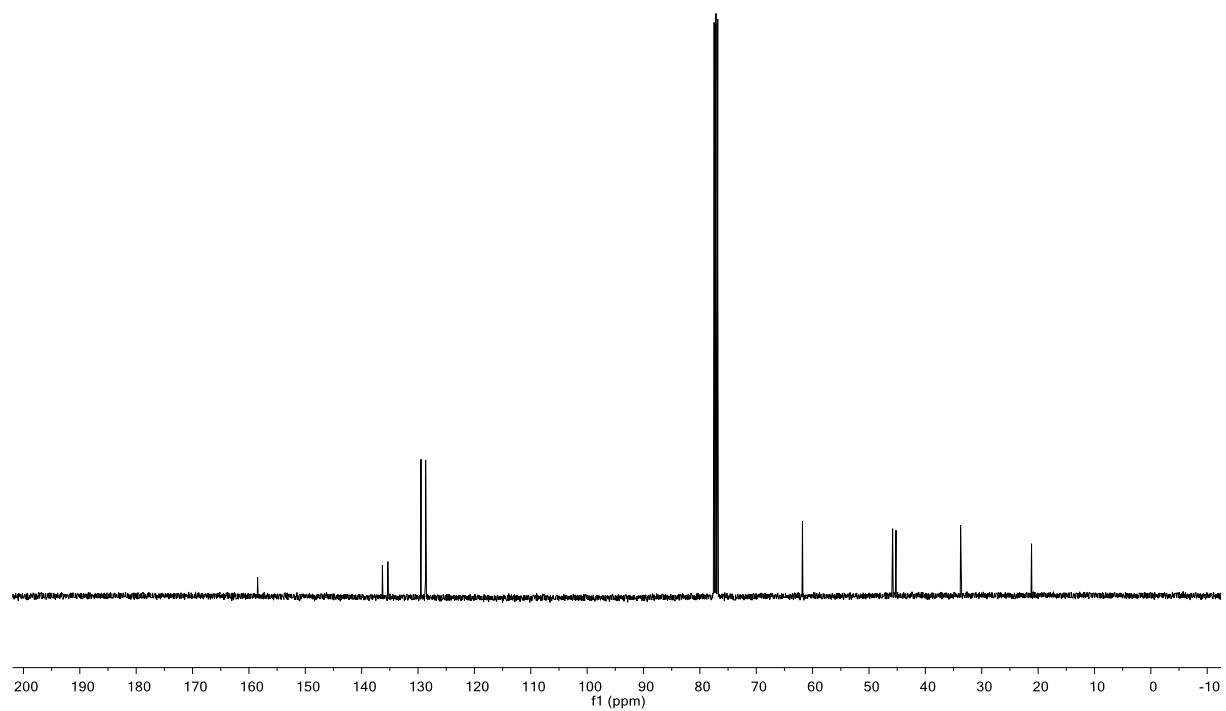

**Figure S15.** <sup>13</sup>C NMR spectrum of 13b.

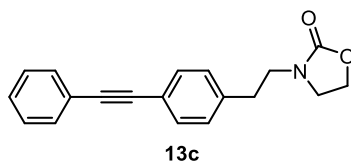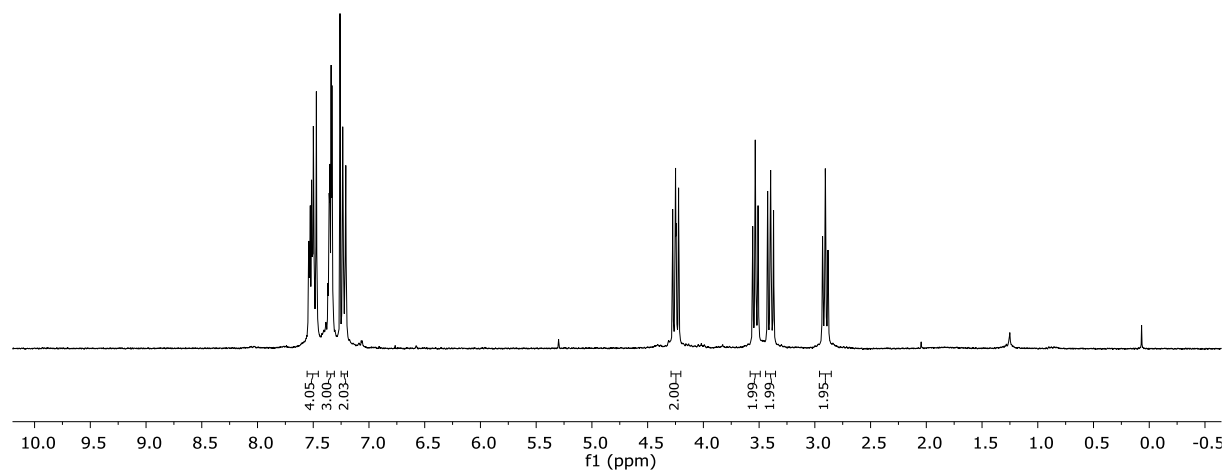

Figure S16. <sup>1</sup>H NMR spectrum of **13c**.

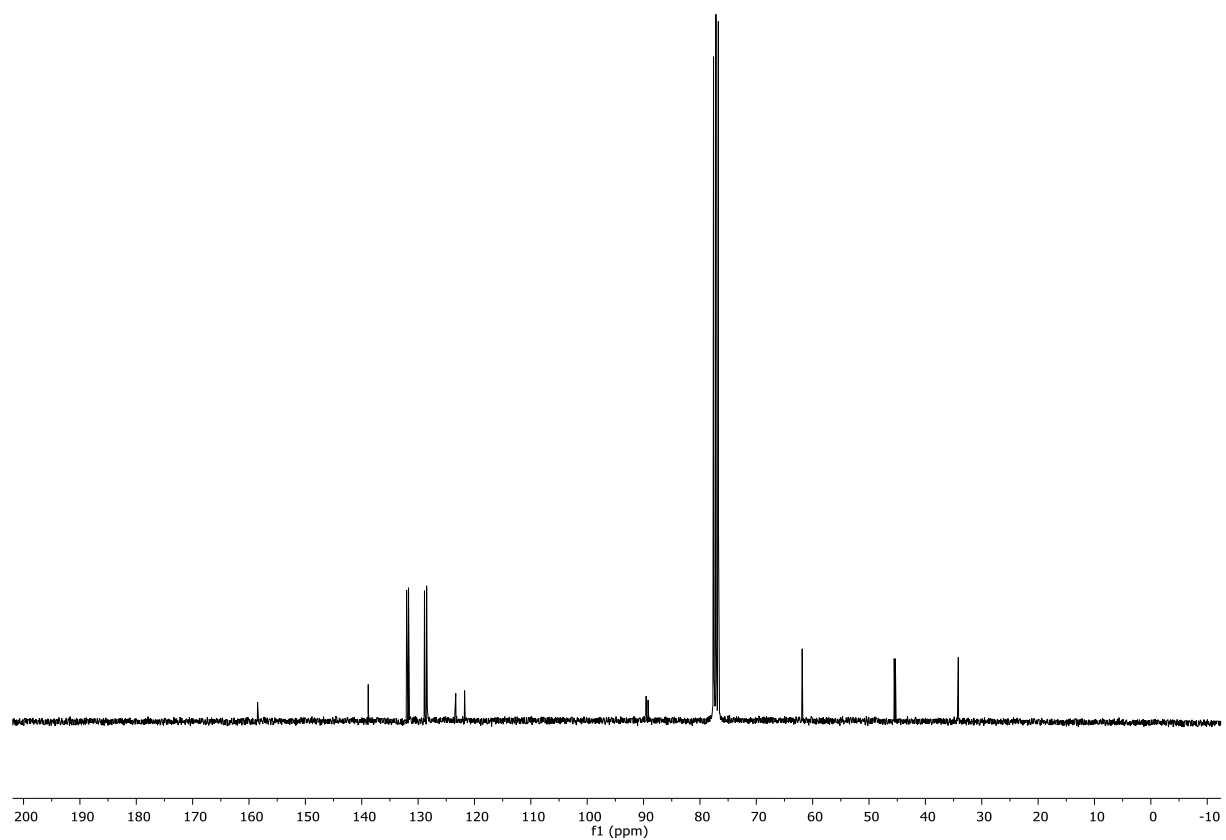

Figure S17. <sup>13</sup>C NMR spectrum of **13c**.

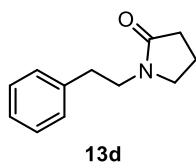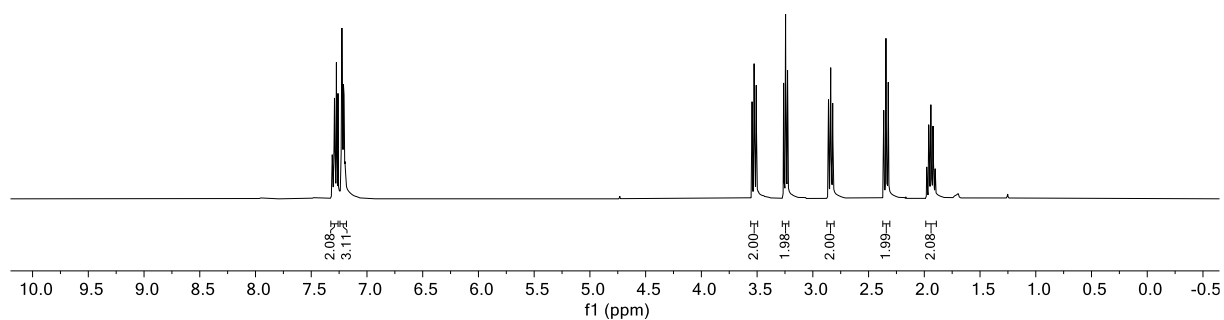

**Figure S18.**  $^1\text{H}$  NMR spectrum of **13d**.

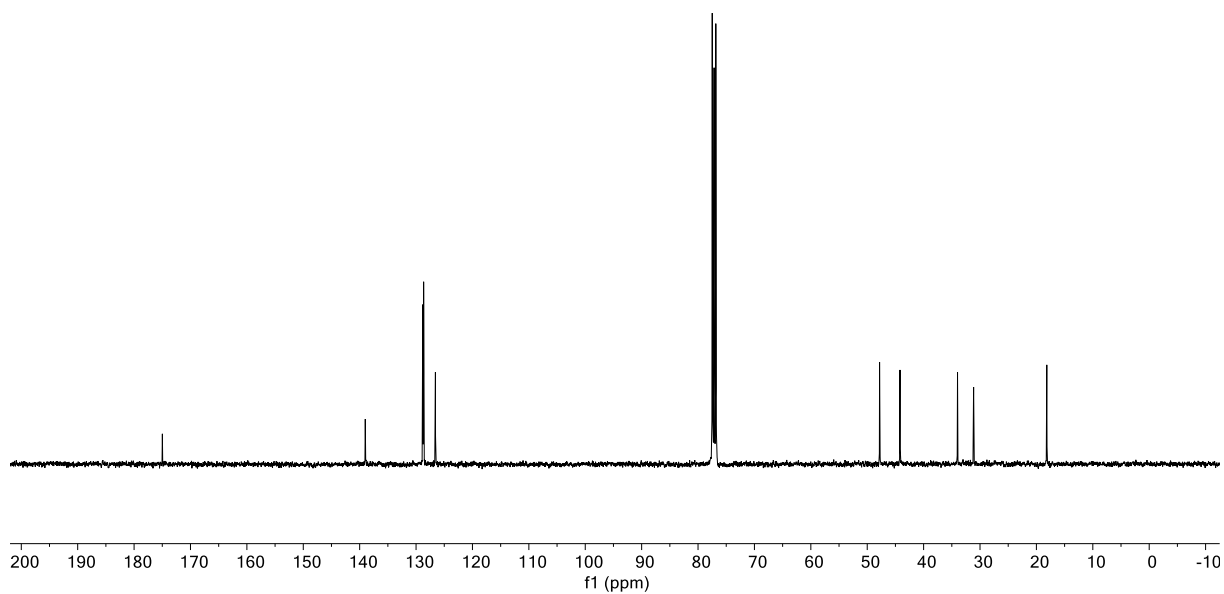

**Figure S19.**  $^{13}\text{C}$  NMR spectrum of **13d**.

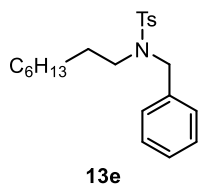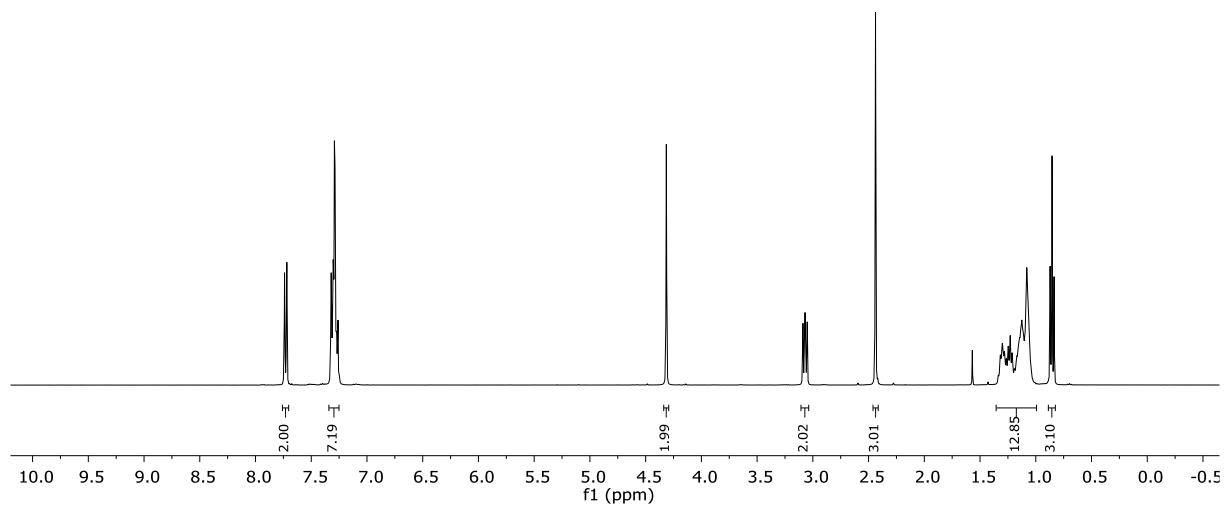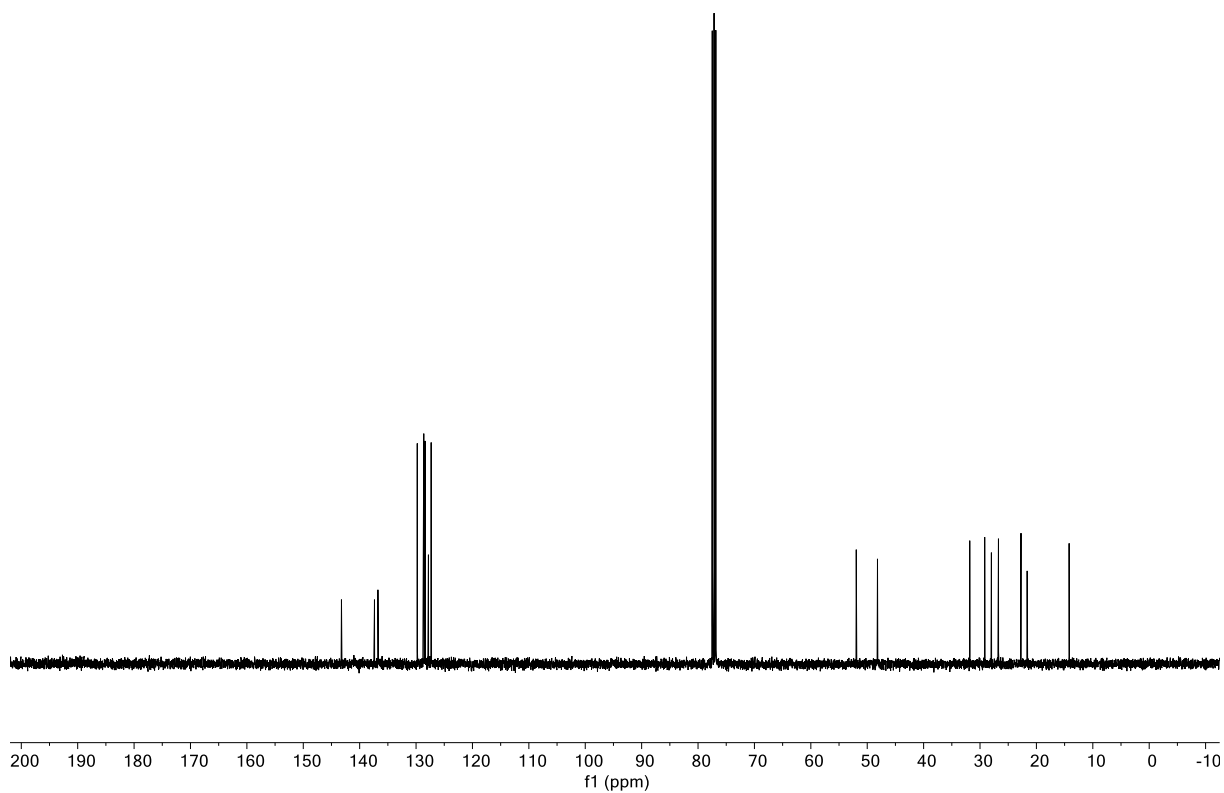

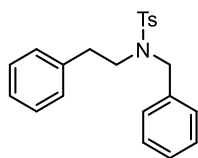

13f

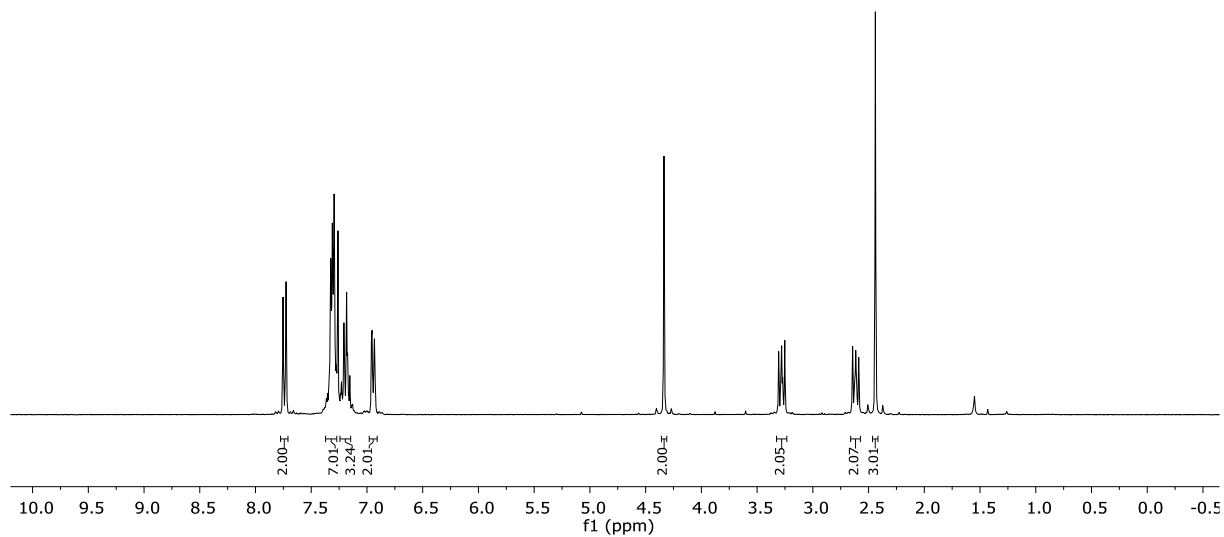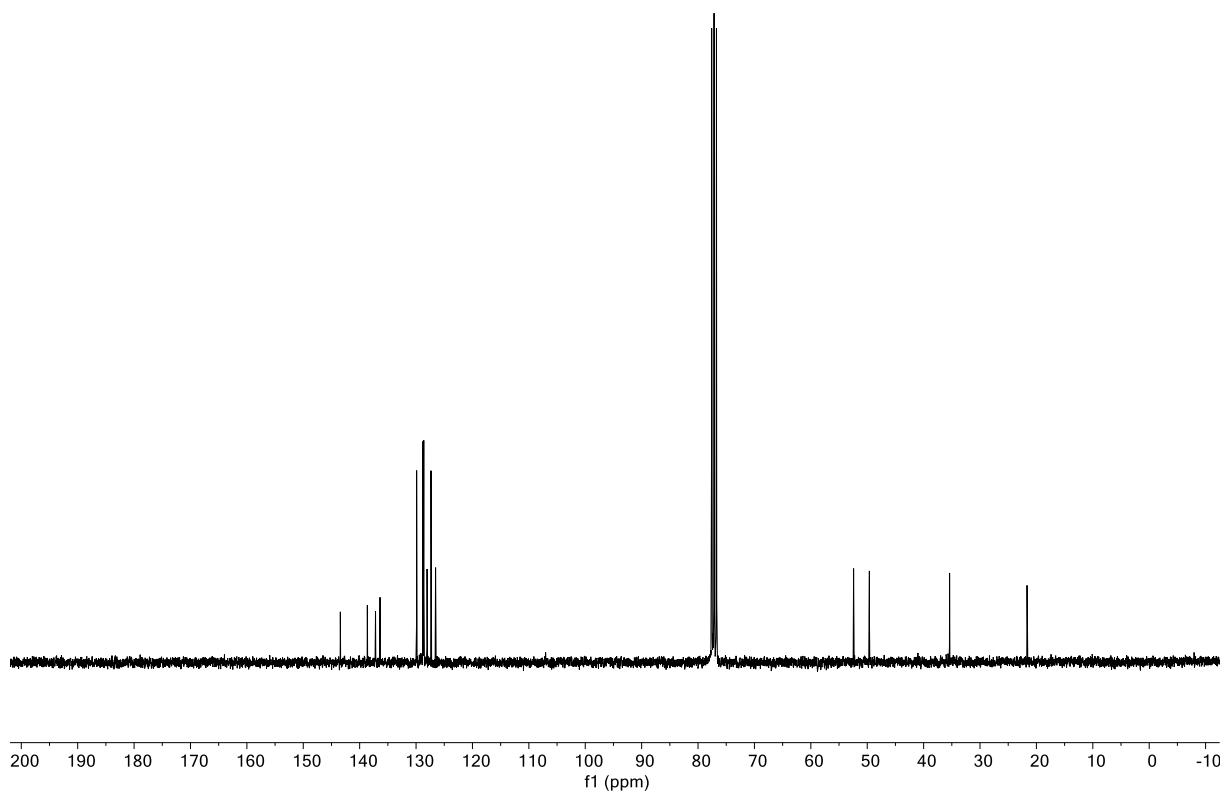

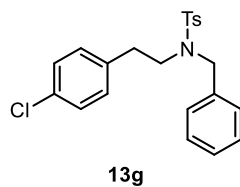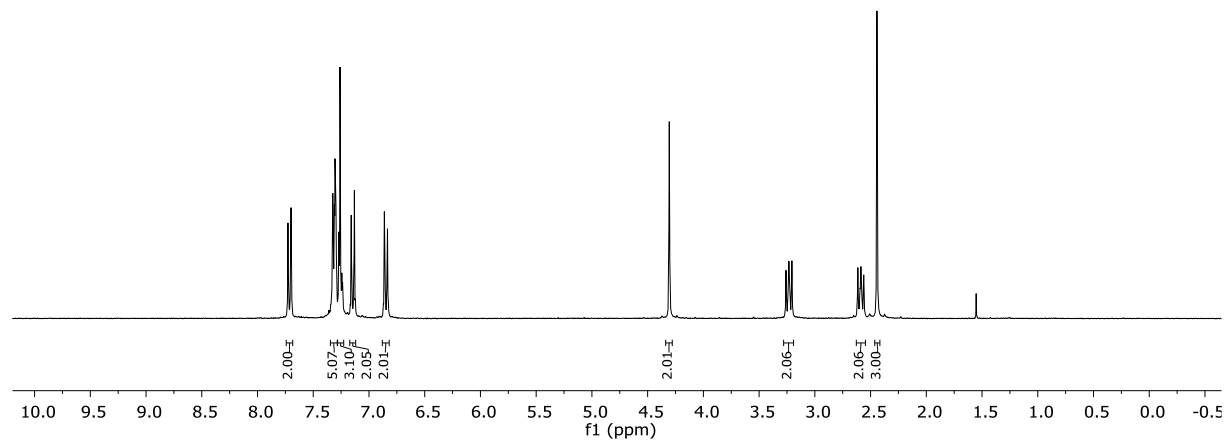

Figure S24. <sup>1</sup>H NMR spectrum of **13g**.

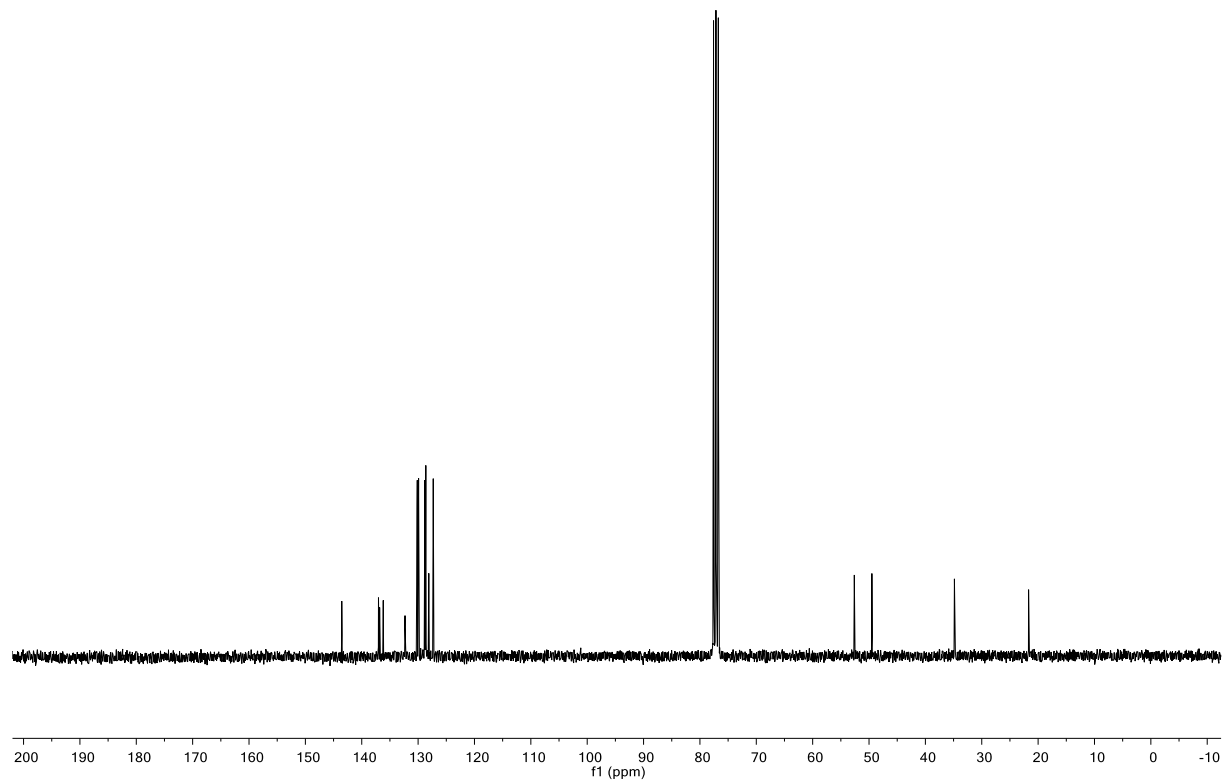

Figure S25. <sup>13</sup>C NMR spectrum of **13g**.



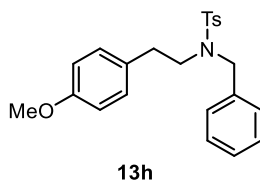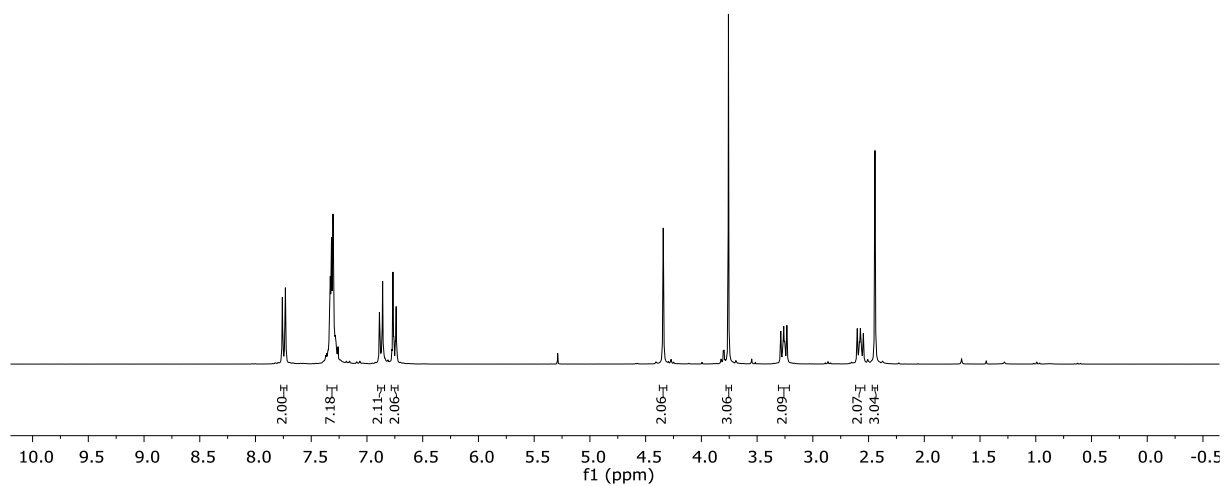

Figure S26. <sup>1</sup>H NMR spectrum of 13h.

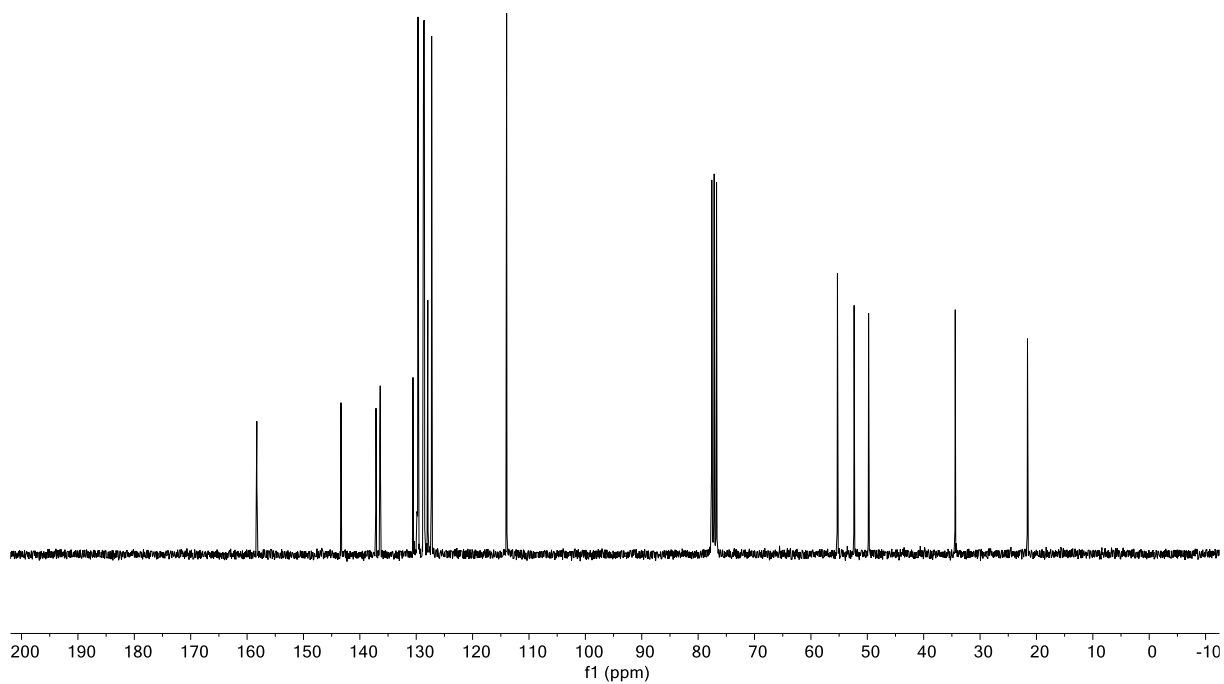

Figure S27. <sup>13</sup>C NMR spectrum of 13h.

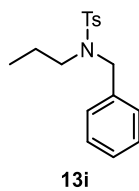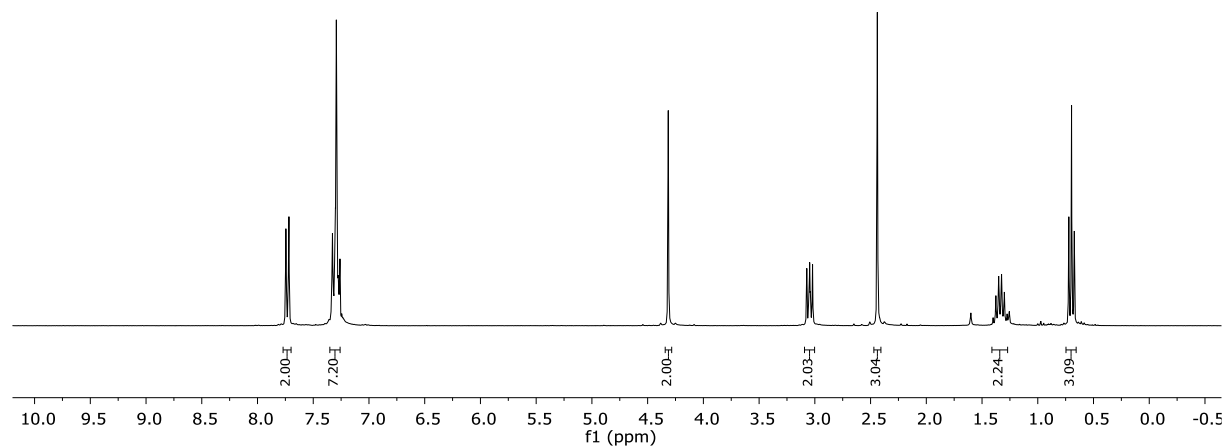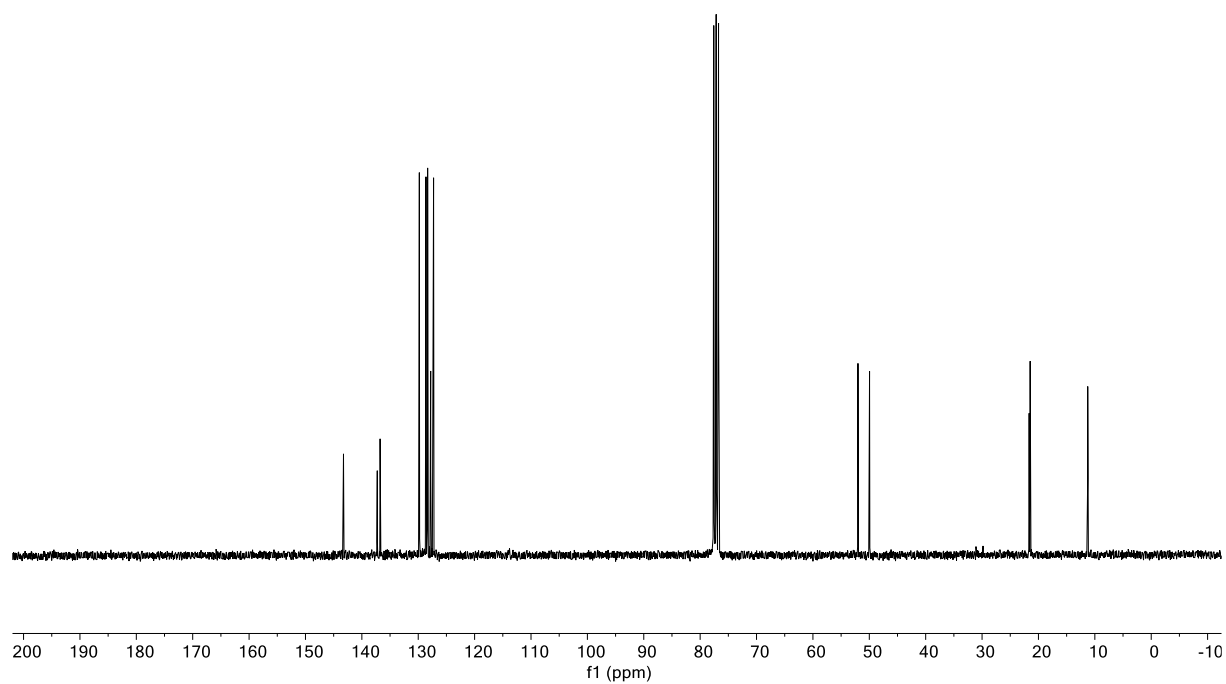

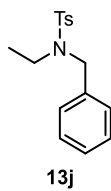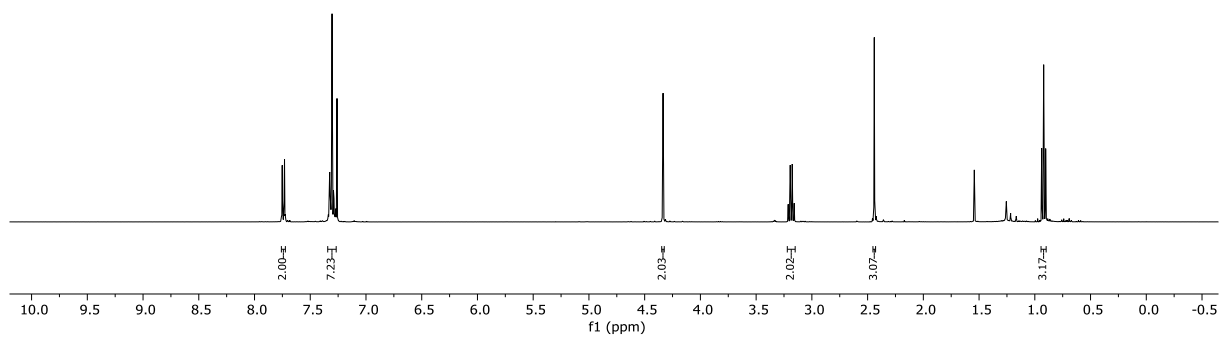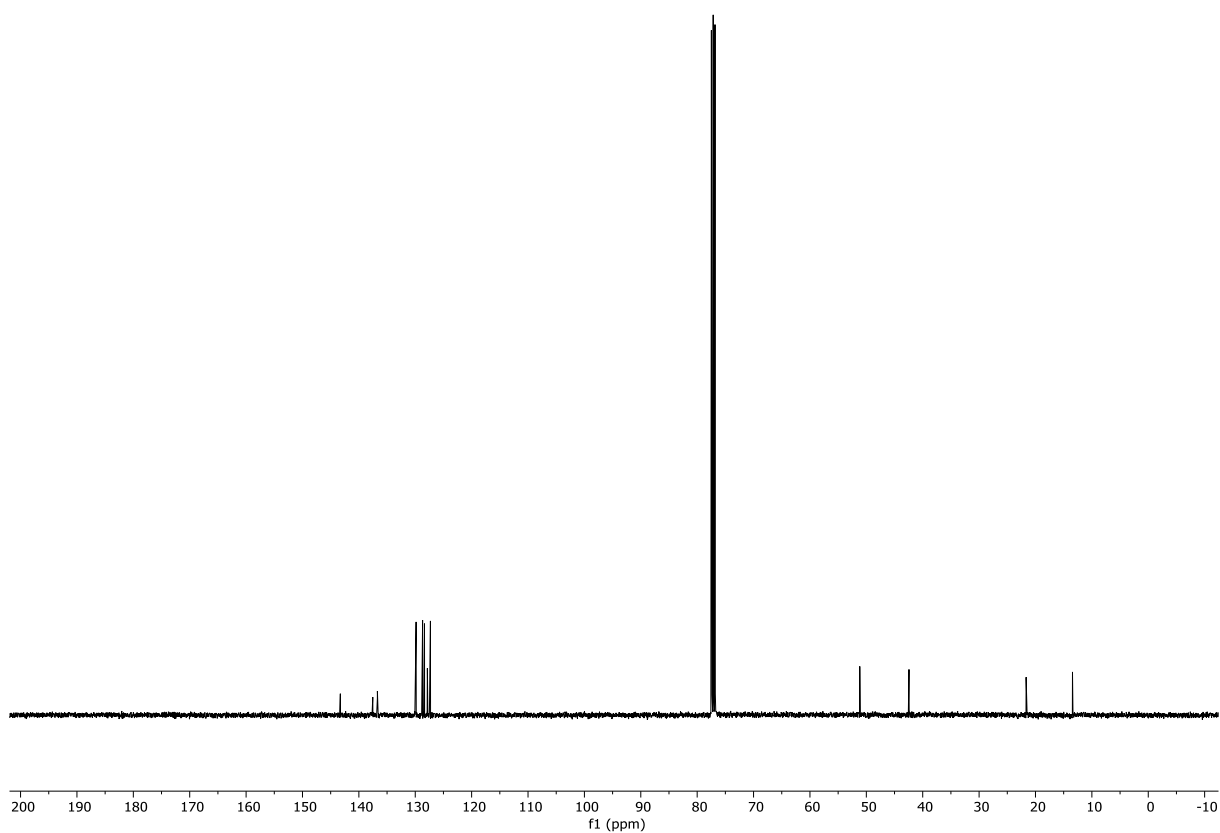

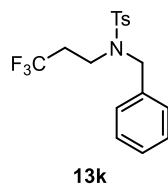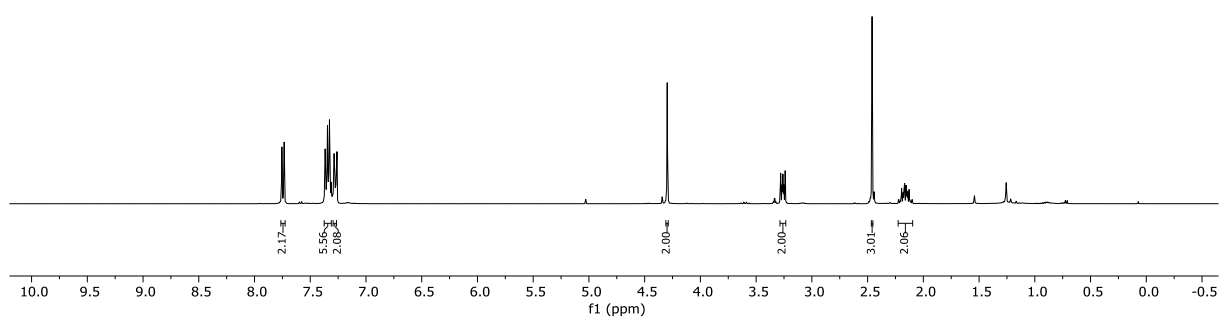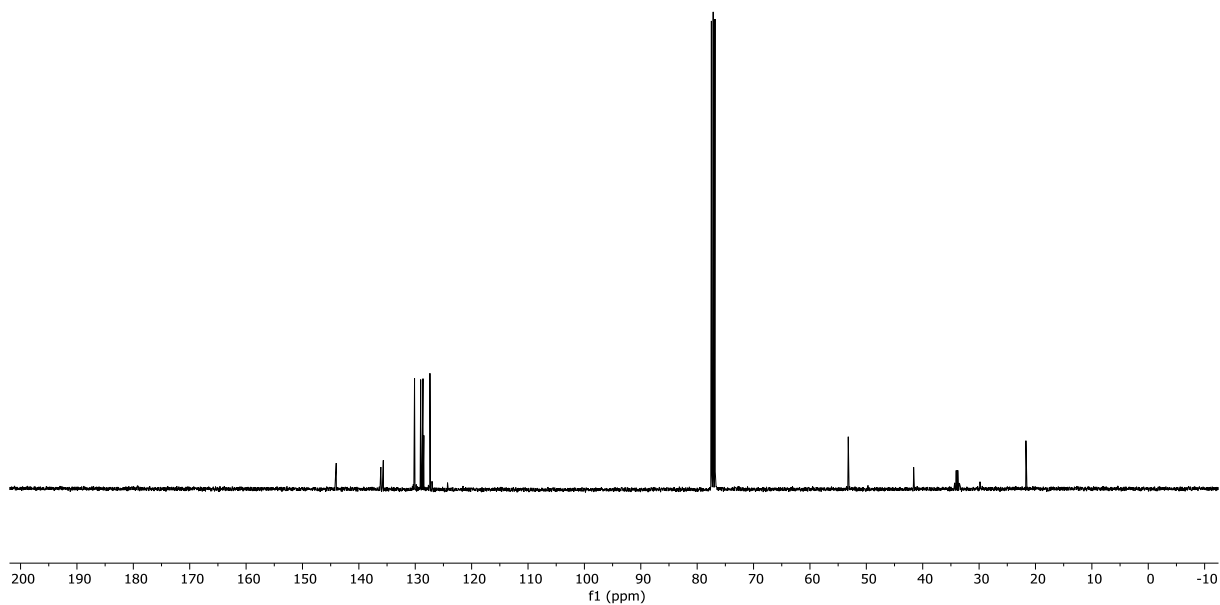

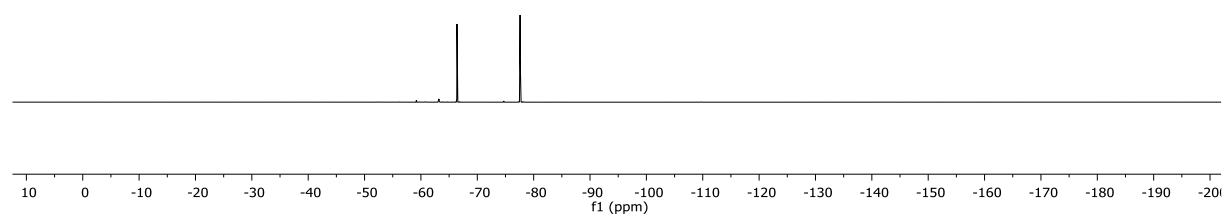

**Figure S34.**  $^{19}\text{F}$  NMR spectrum of **13k**.

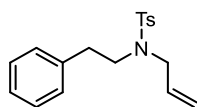

131

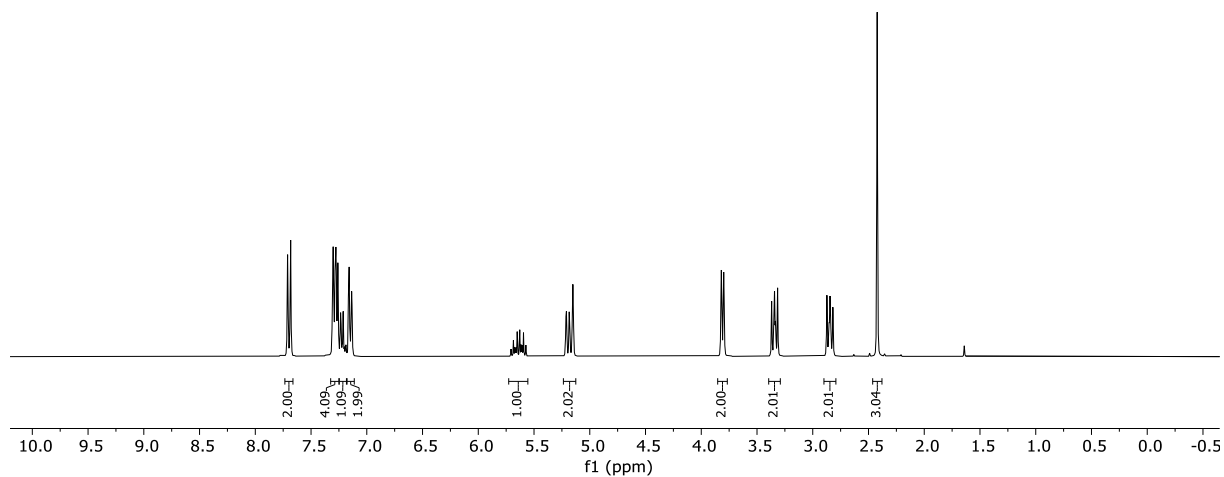

Figure S35.  $^1\text{H}$  NMR spectrum of 131.

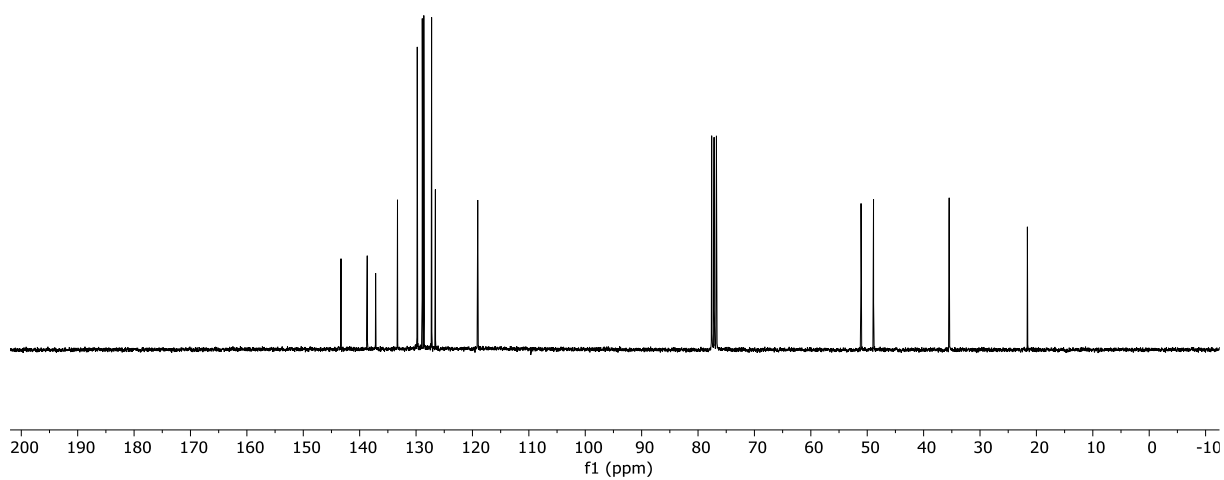

Figure S36.  $^{13}\text{C}$  NMR spectrum of 131.

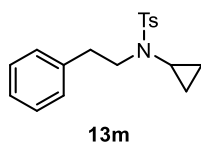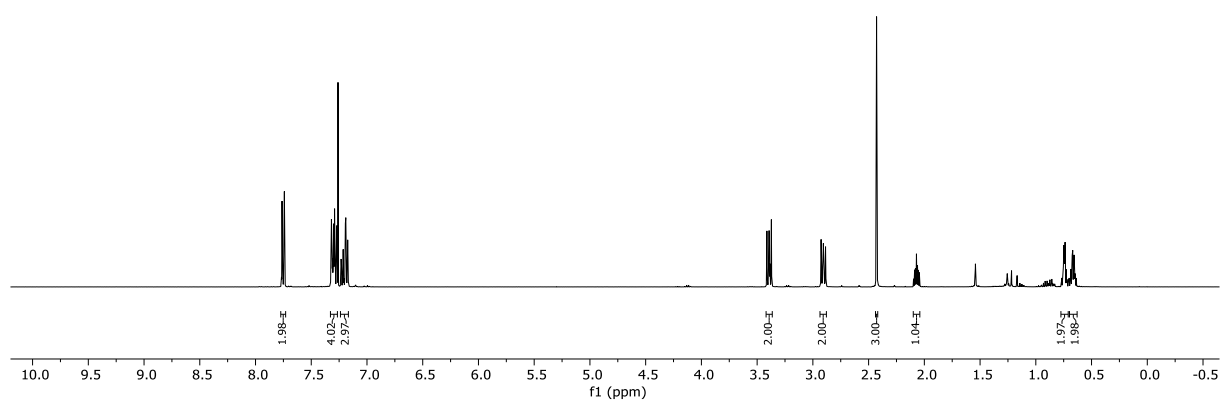

Figure S37.  $^1\text{H}$  NMR spectrum of **13m**.

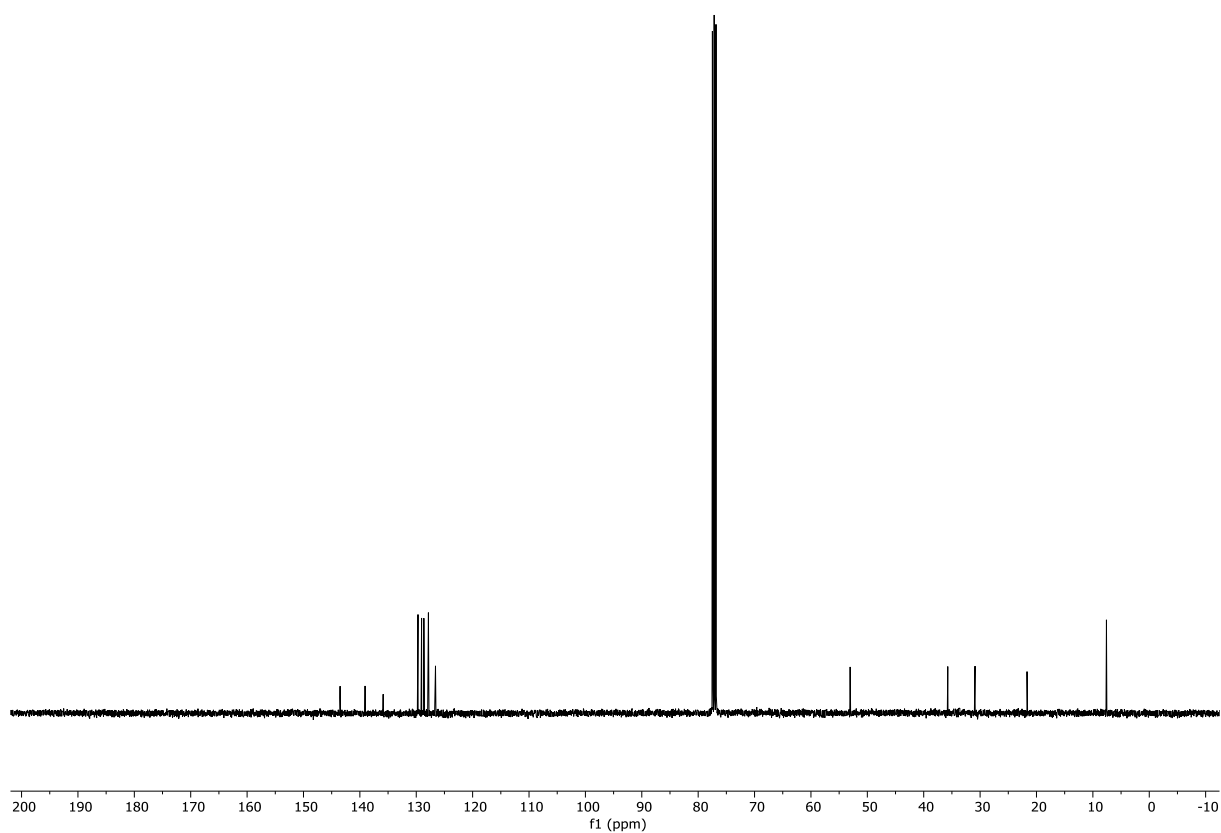

Figure S38.  $^{13}\text{C}$  NMR spectrum of **13m**.

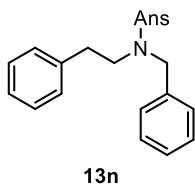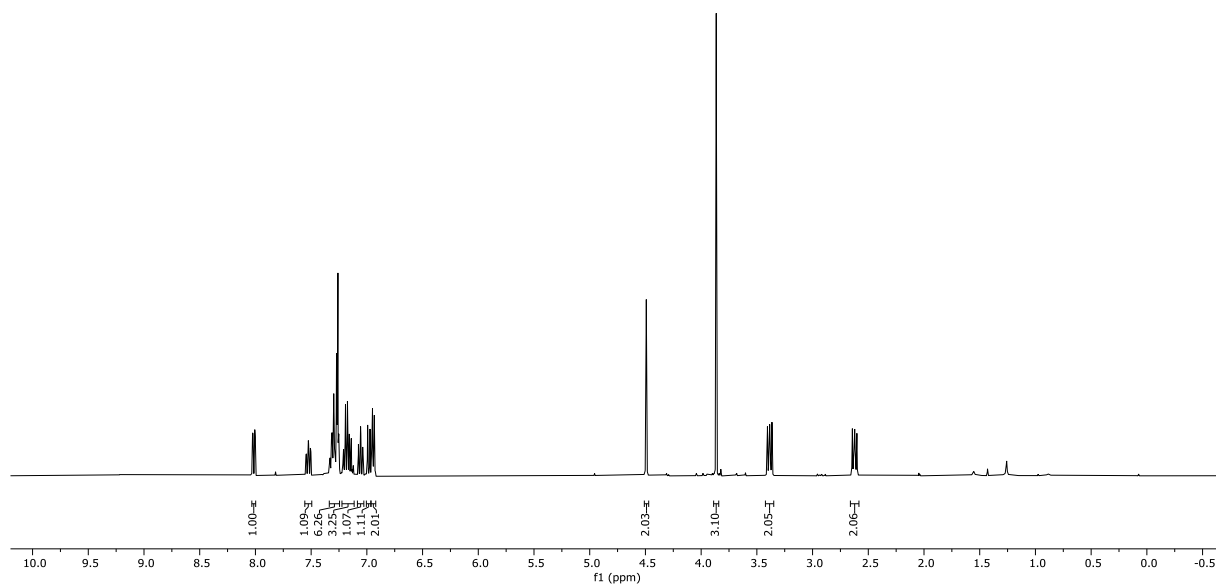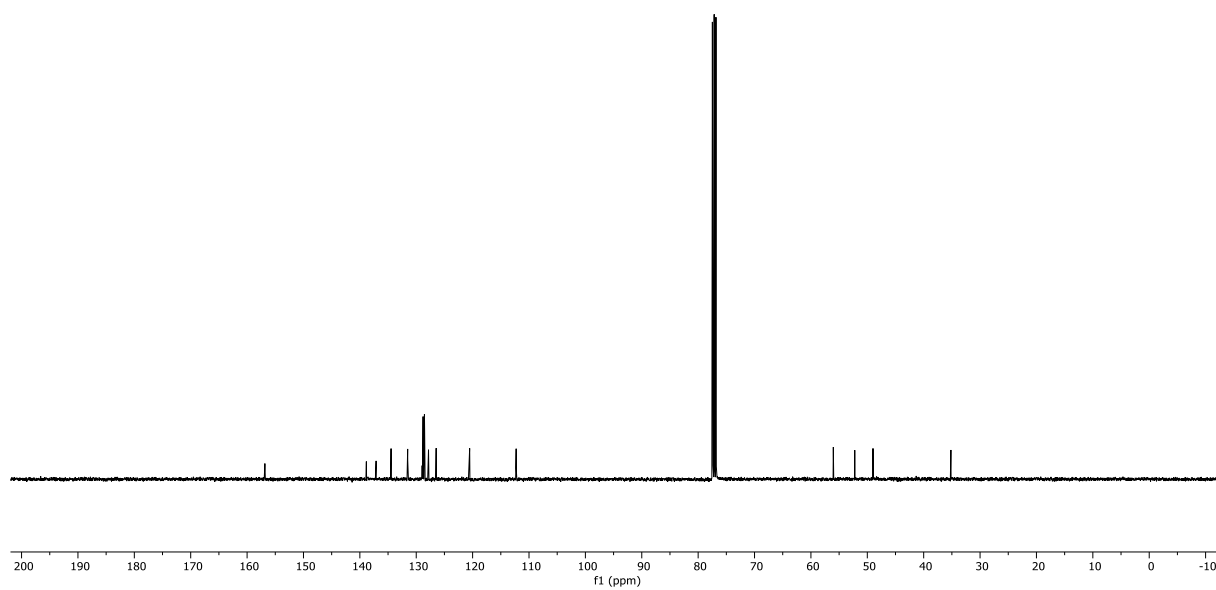



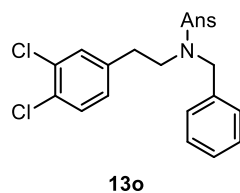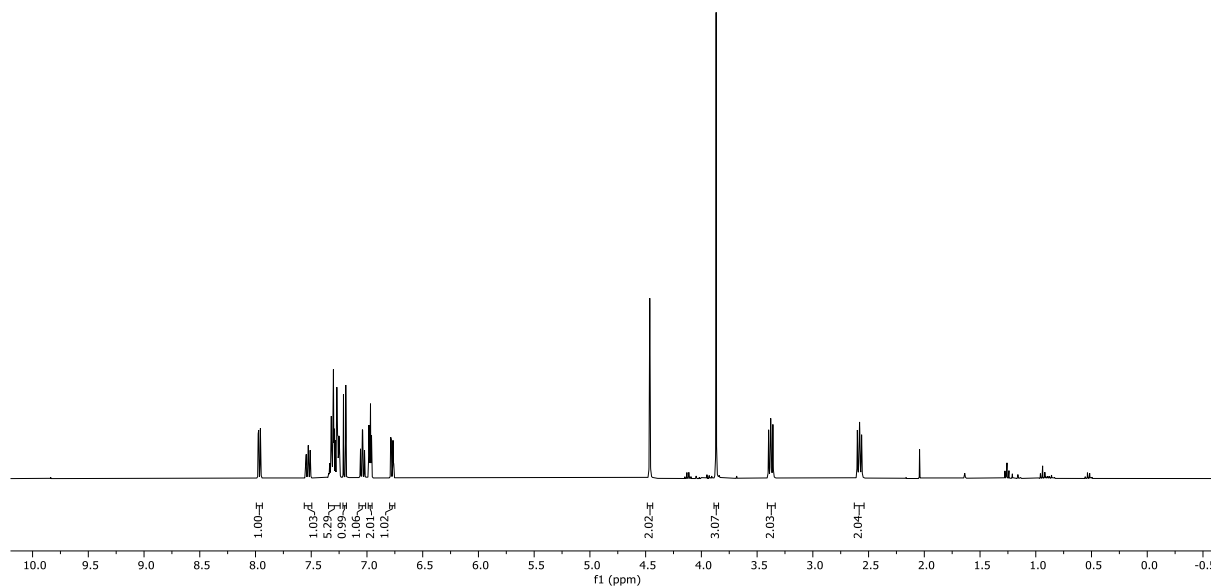

Figure S41. <sup>1</sup>H NMR spectrum of **13o**.

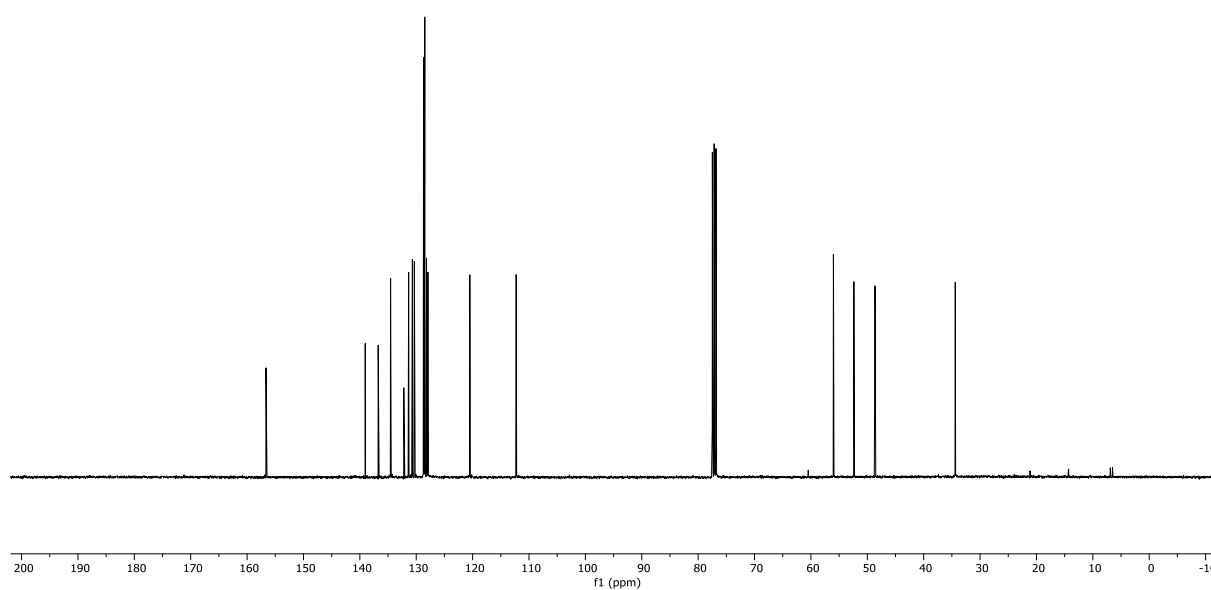

Figure S42. <sup>13</sup>C NMR spectrum of **13o**.

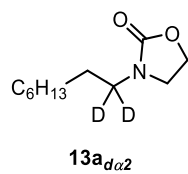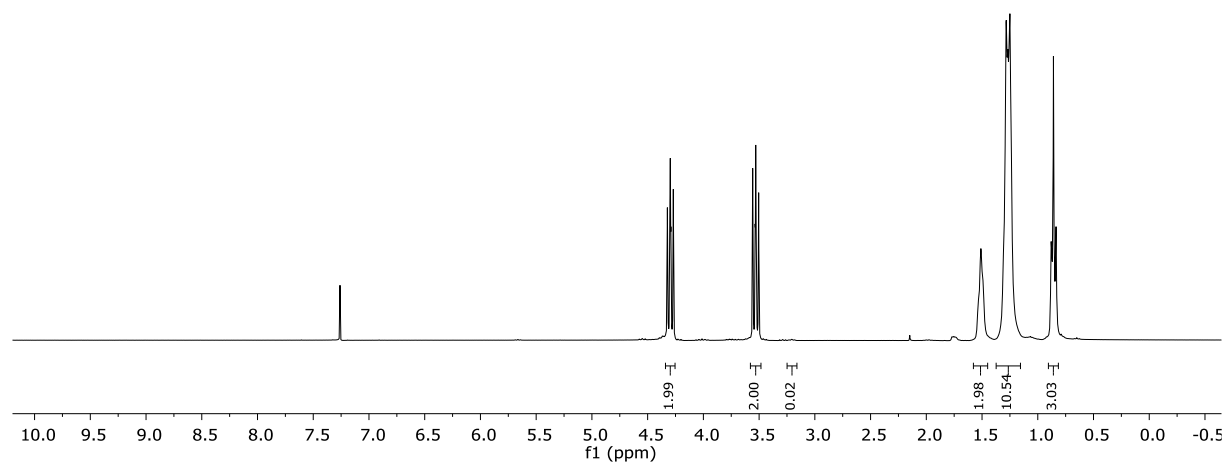

Figure S43. <sup>1</sup>H NMR spectrum of **13a<sub>da2</sub>**.

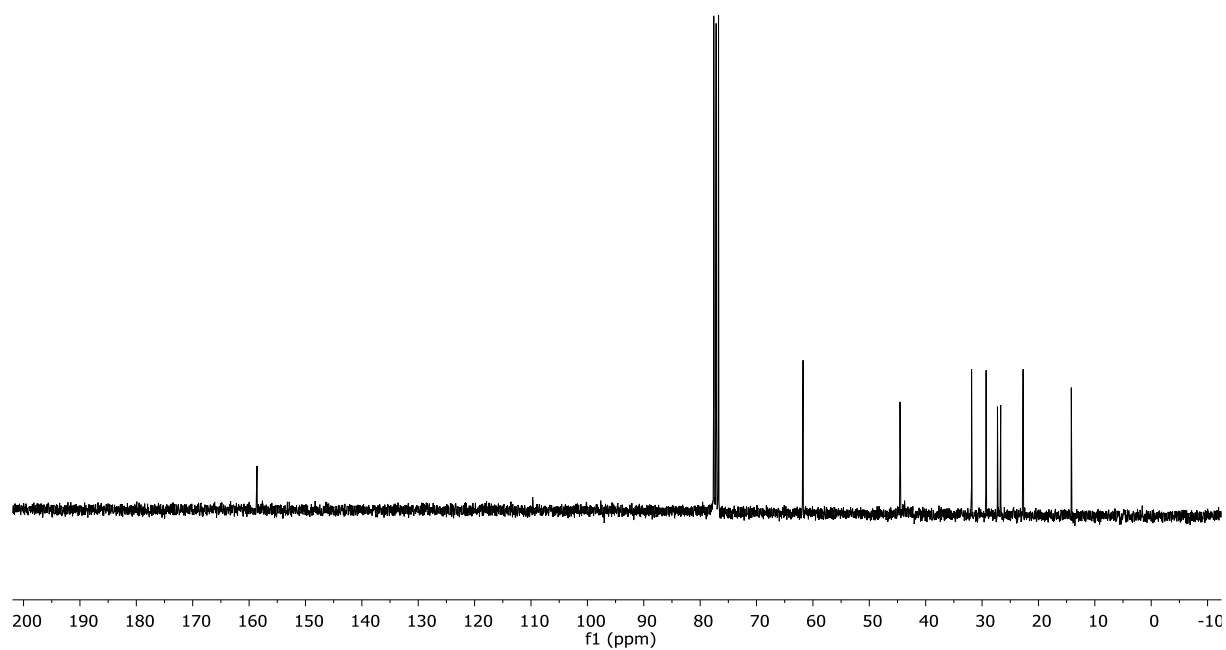

Figure S44. <sup>13</sup>C NMR spectrum of **13a<sub>da2</sub>**.

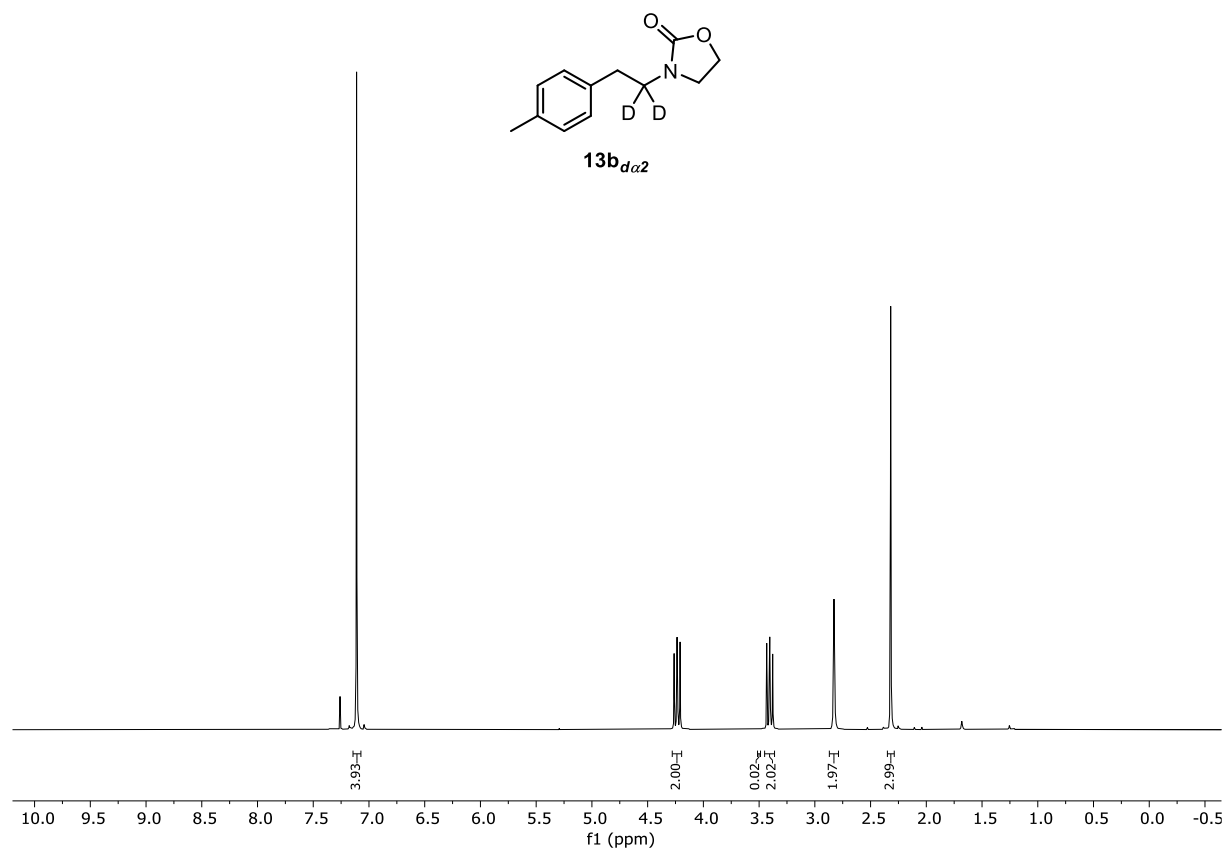

Figure S45. <sup>1</sup>H NMR spectrum of **13b<sub>da2</sub>**.

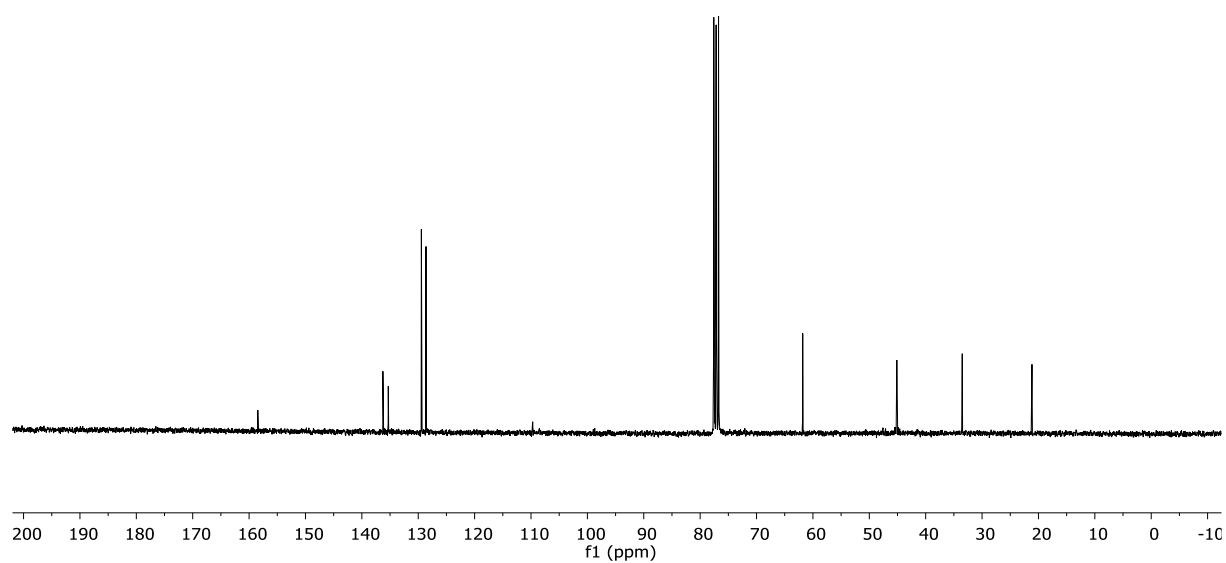

Figure S46. <sup>13</sup>C NMR spectrum of **13b<sub>da2</sub>**.

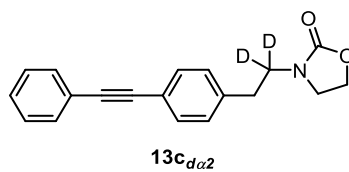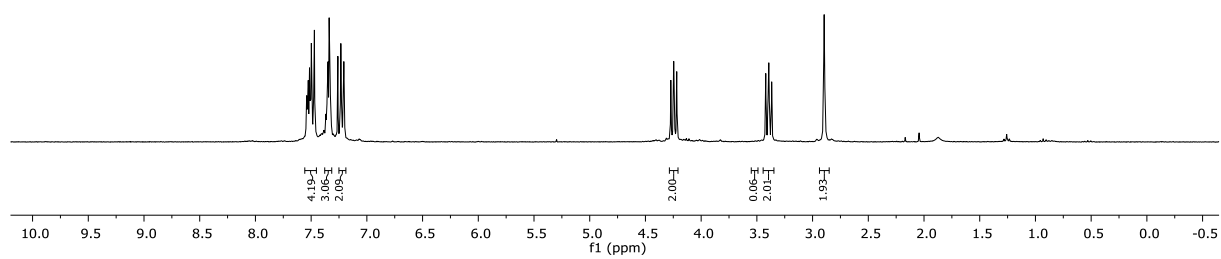

Figure S47. <sup>1</sup>H NMR spectrum of **13c<sub>da2</sub>**.

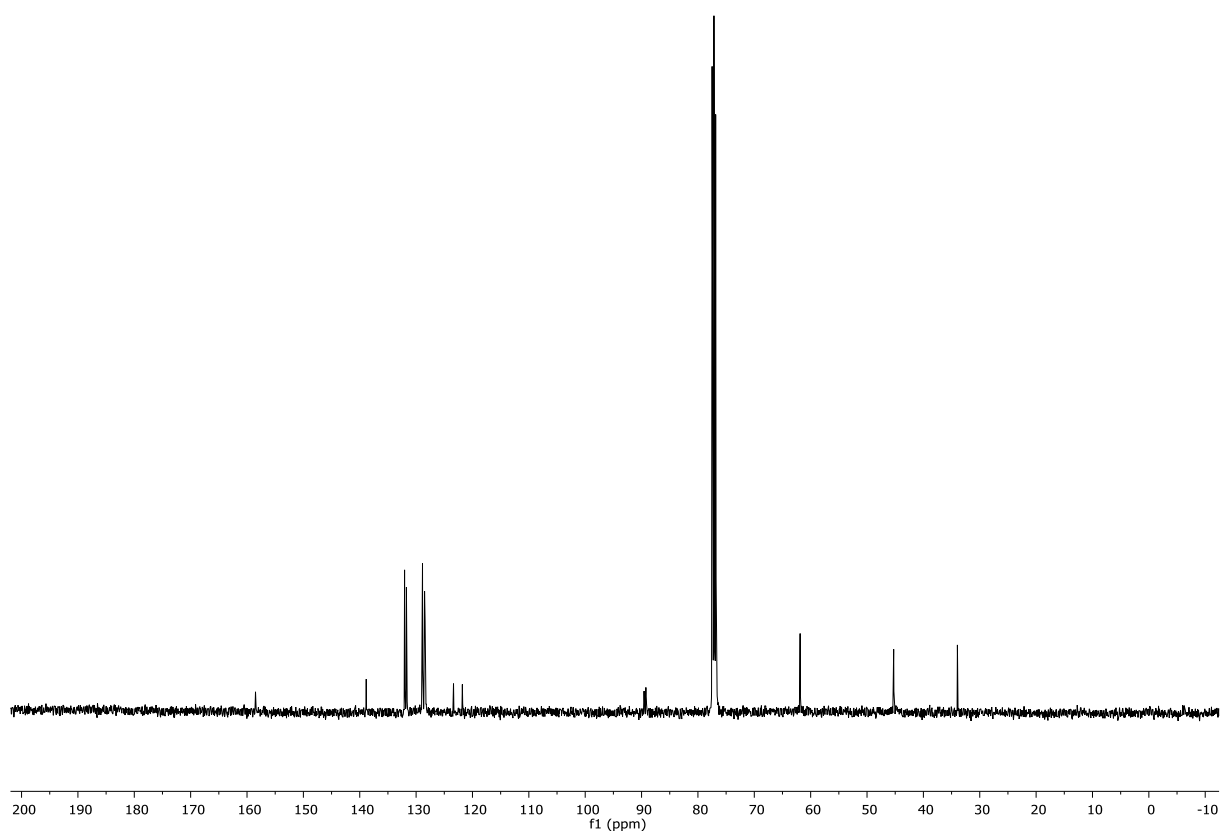

Figure S48. <sup>13</sup>C NMR spectrum of **13c<sub>da2</sub>**.

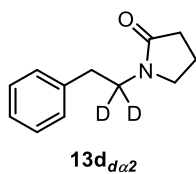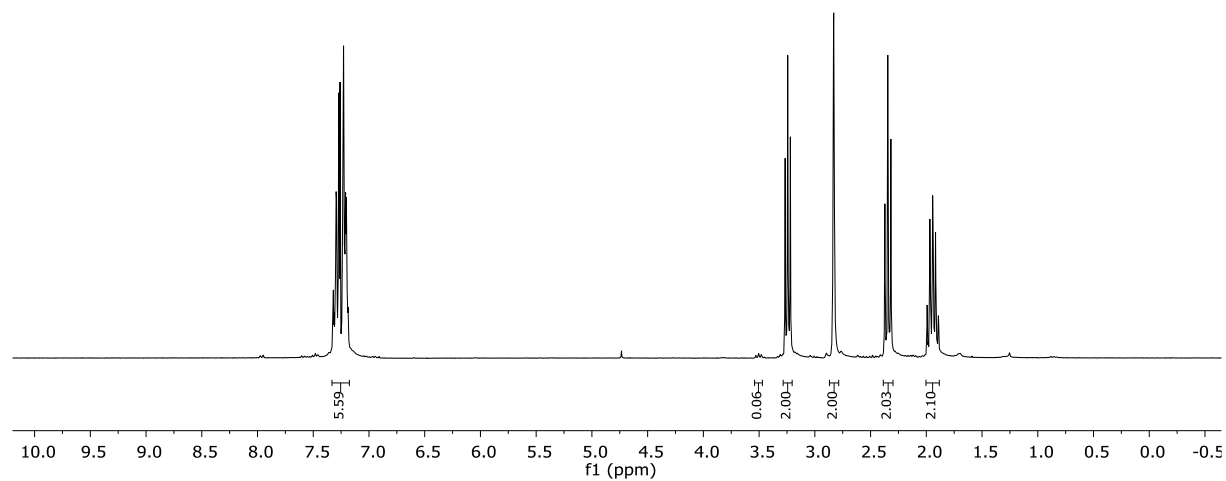

Figure S49. <sup>1</sup>H NMR spectrum of 13d<sub>d2</sub>.

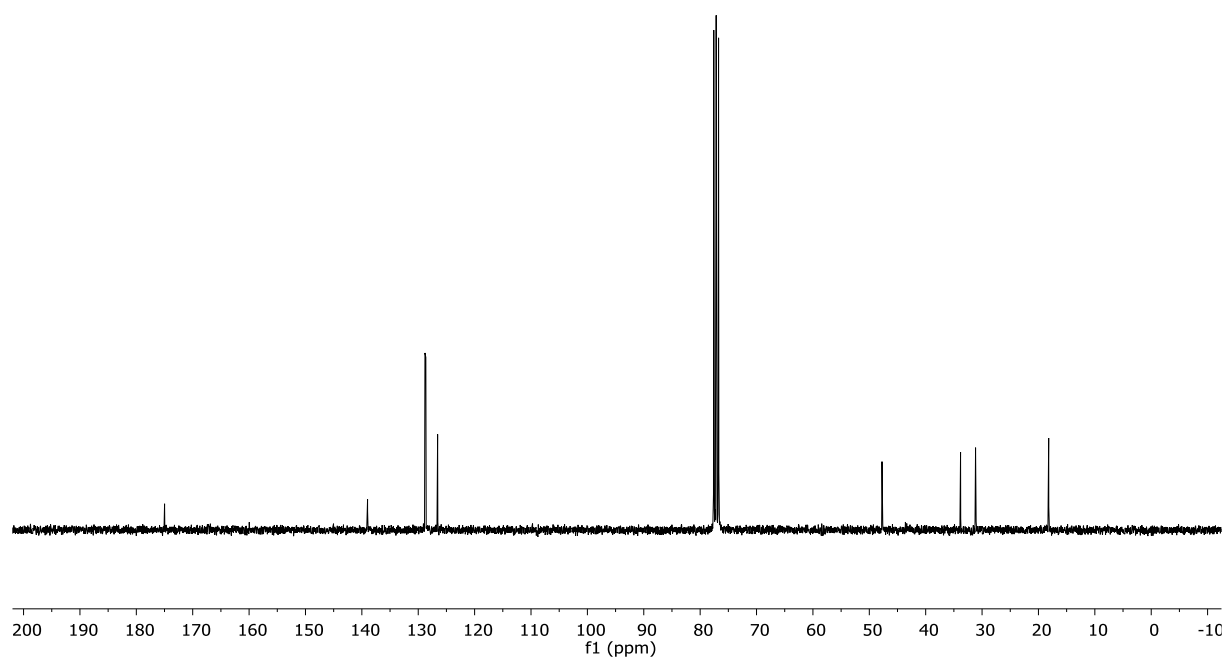

Figure S50. <sup>13</sup>C NMR spectrum of 13d<sub>d2</sub>.

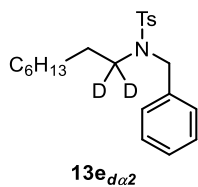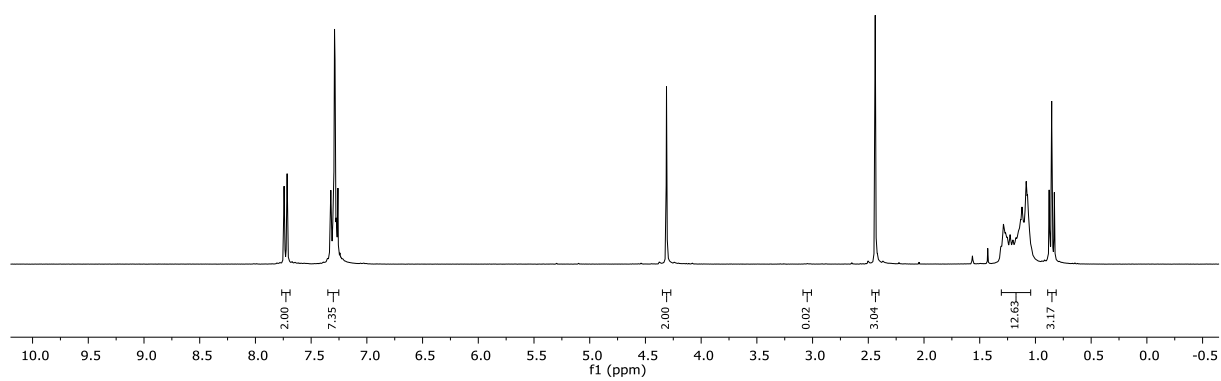

**Figure S51.** <sup>1</sup>H NMR spectrum of **13e<sub>d $\alpha$ 2</sub>**.

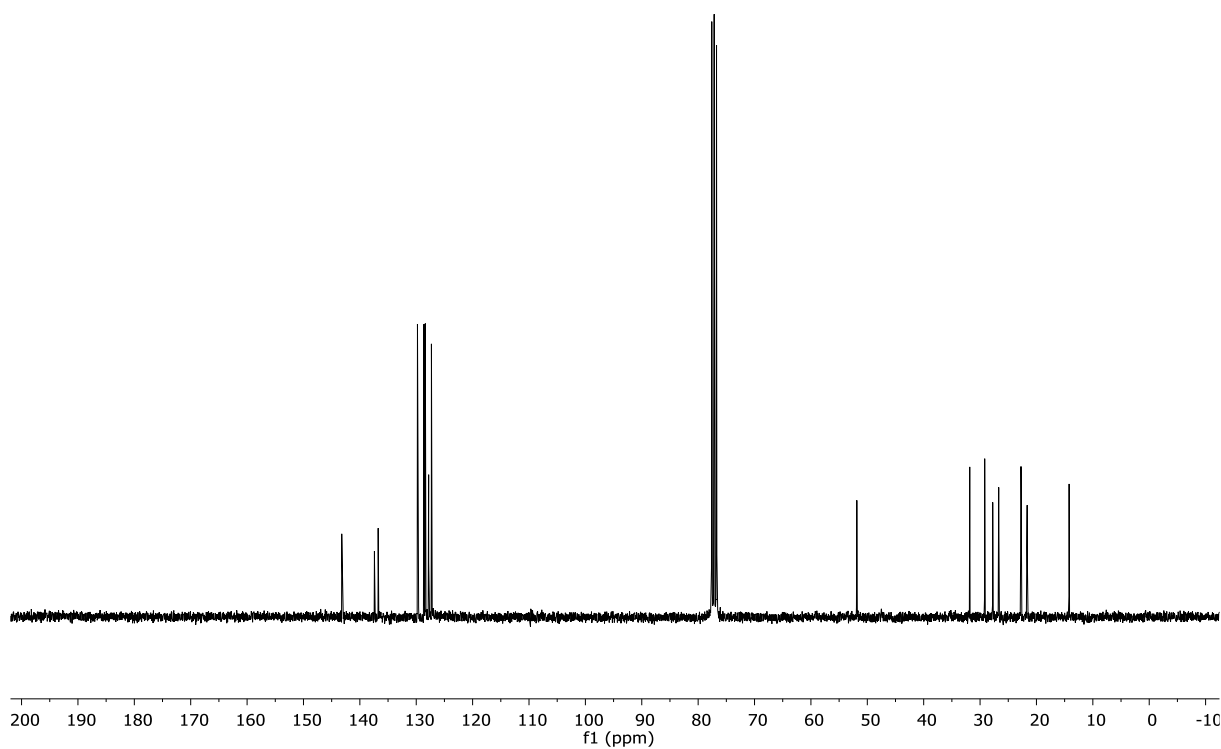

**Figure S52.** <sup>13</sup>C NMR spectrum of **13e<sub>d $\alpha$ 2</sub>**.

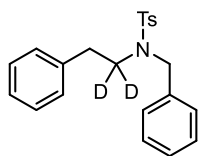

**13f<sub>da2</sub>**

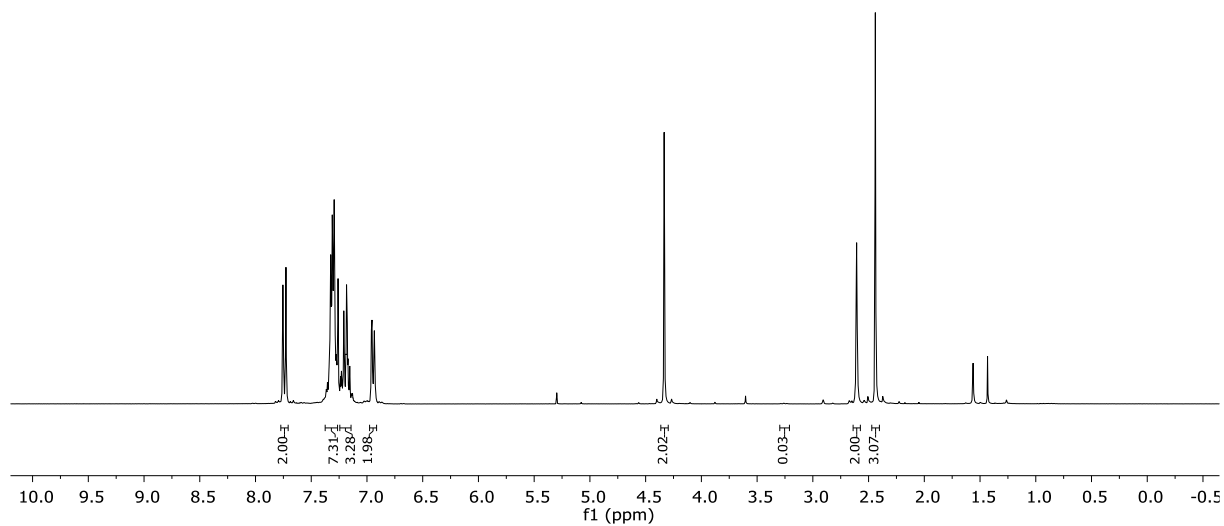

**Figure S53.** <sup>1</sup>H NMR spectrum of **13f<sub>da2</sub>**.

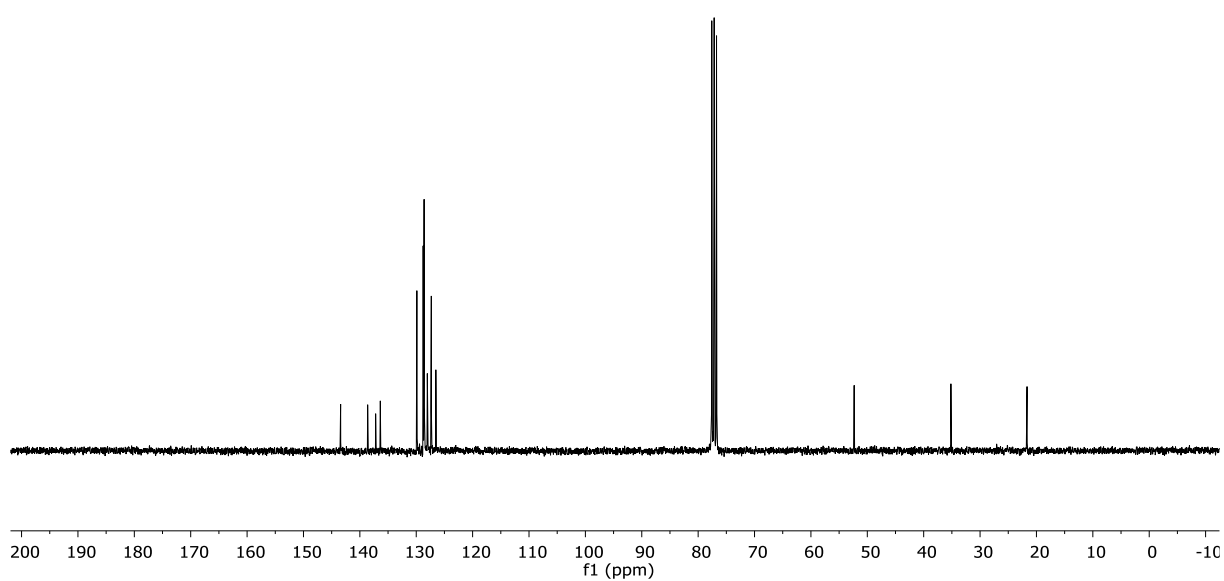

**Figure S54.** <sup>13</sup>C NMR spectrum of **13f<sub>da2</sub>**.

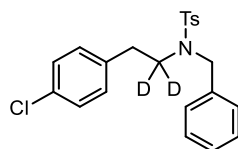

**13g<sub>da2</sub>**

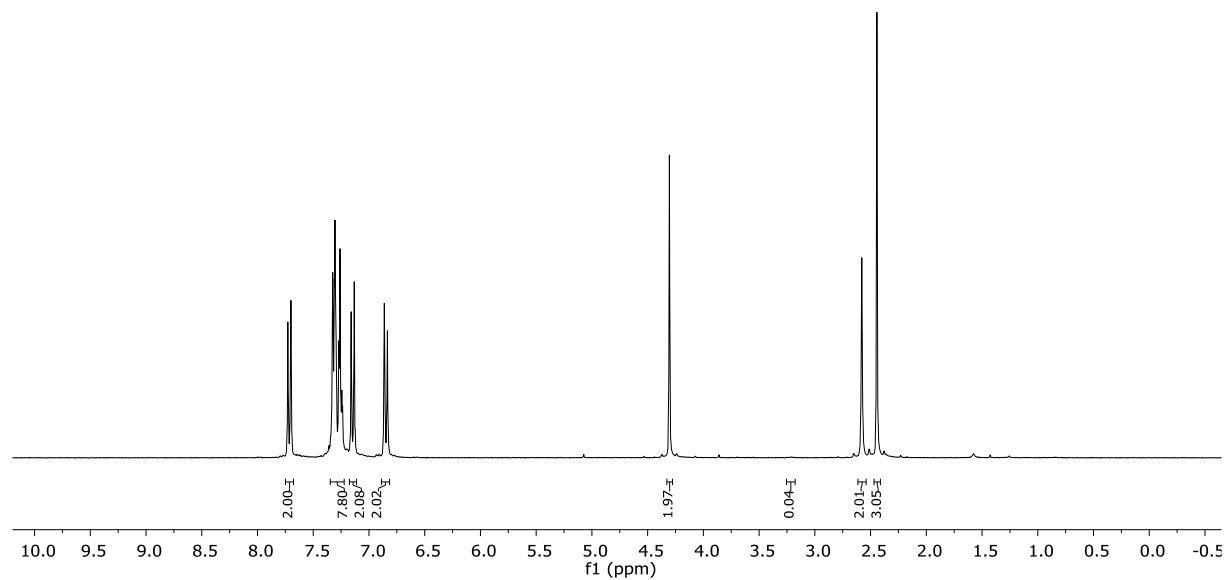

**Figure S55.** <sup>1</sup>H NMR spectrum of **13g<sub>da2</sub>**.

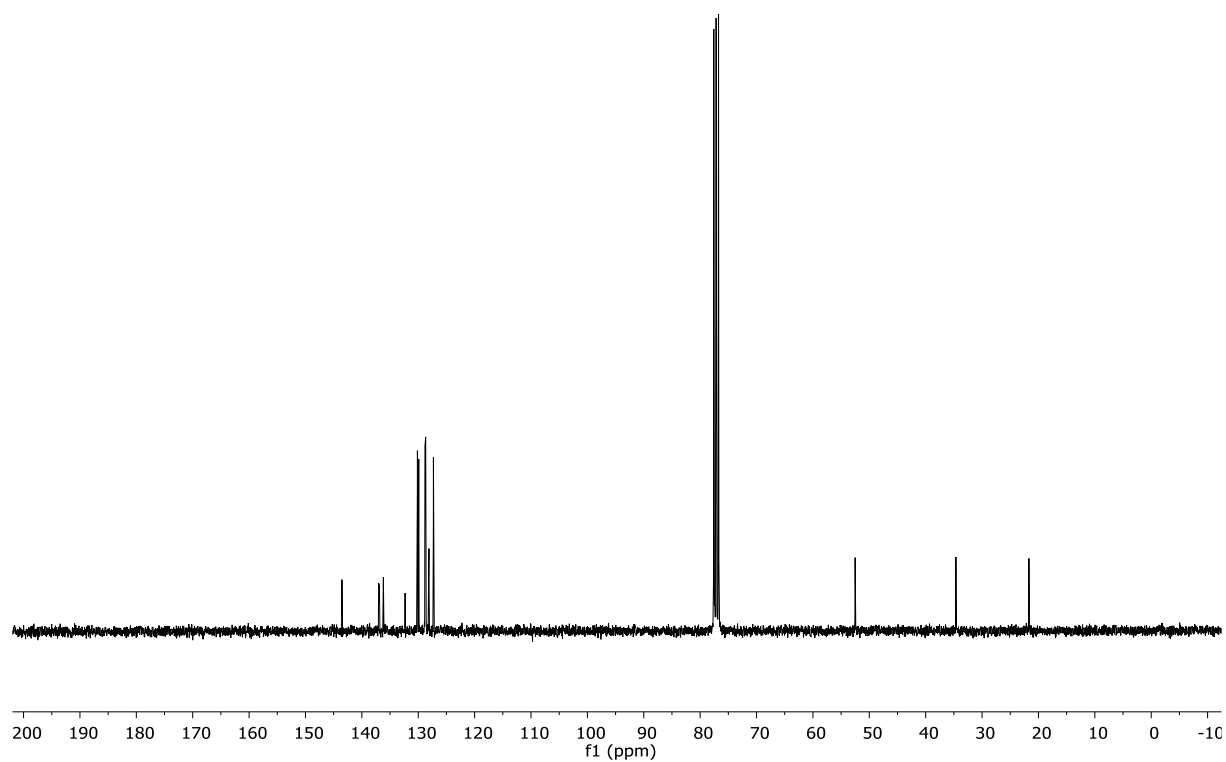

**Figure S56.** <sup>13</sup>C NMR spectrum of **13g<sub>da2</sub>**.



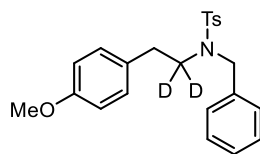

**13h<sub>d2</sub>**

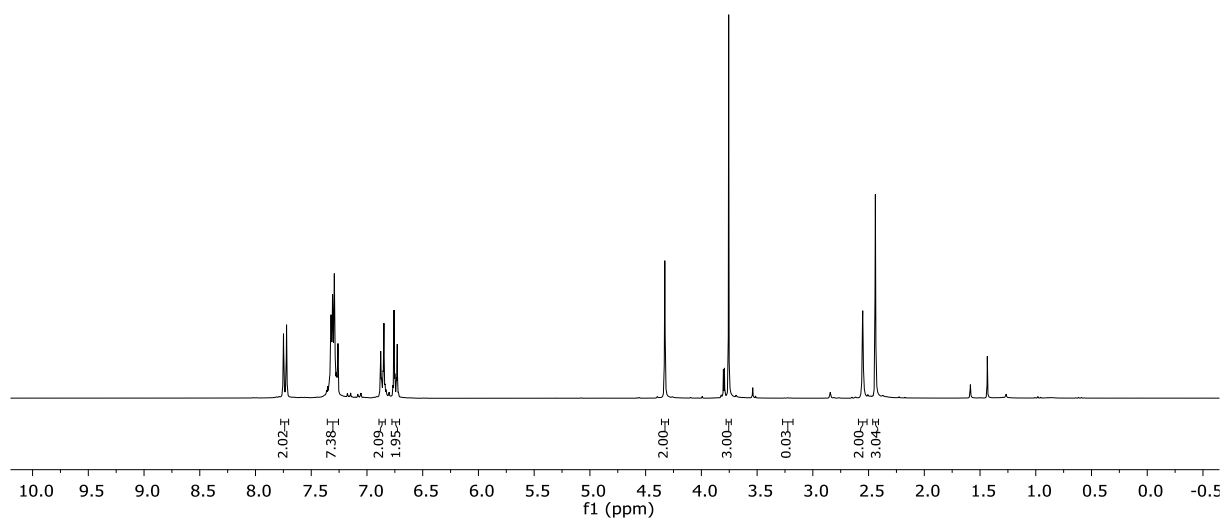

**Figure S57.** <sup>1</sup>H NMR spectrum of **13h<sub>d2</sub>**.

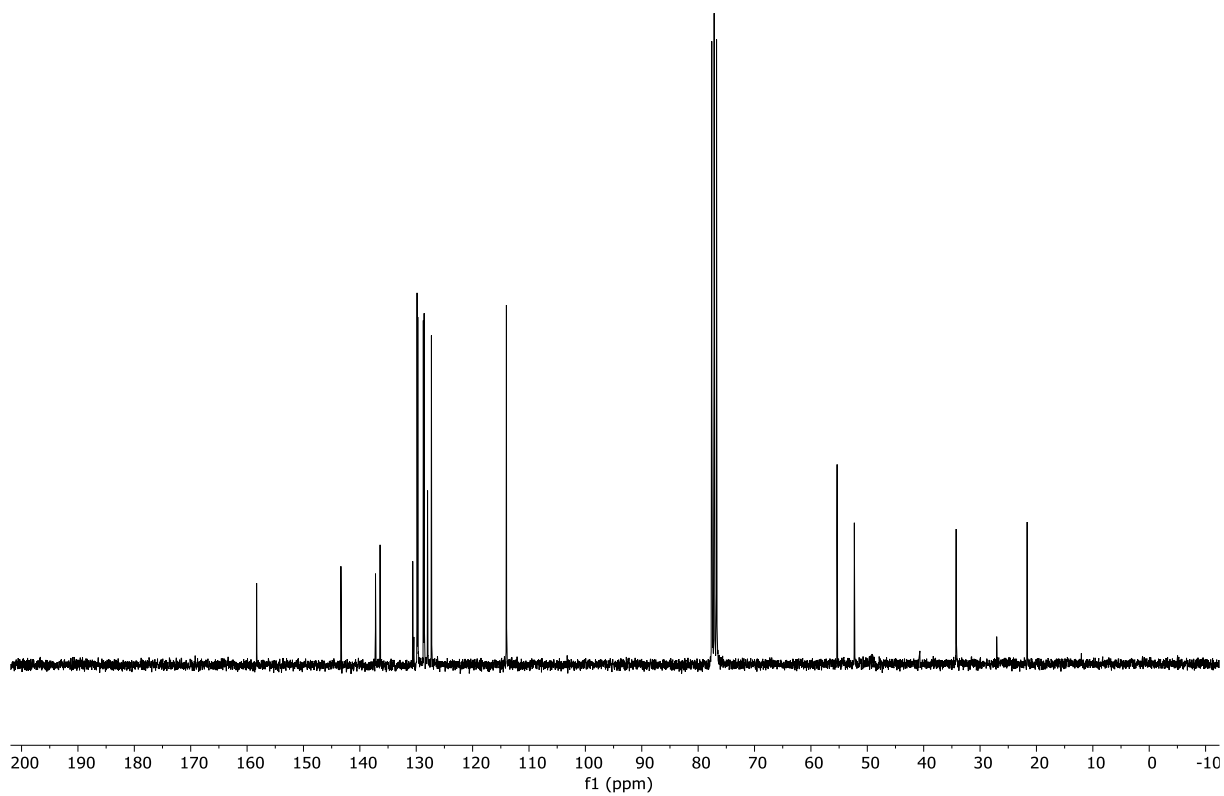

**Figure S58.** <sup>13</sup>C NMR spectrum of **13h<sub>d2</sub>**.

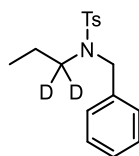

**13i<sub>d2</sub>**

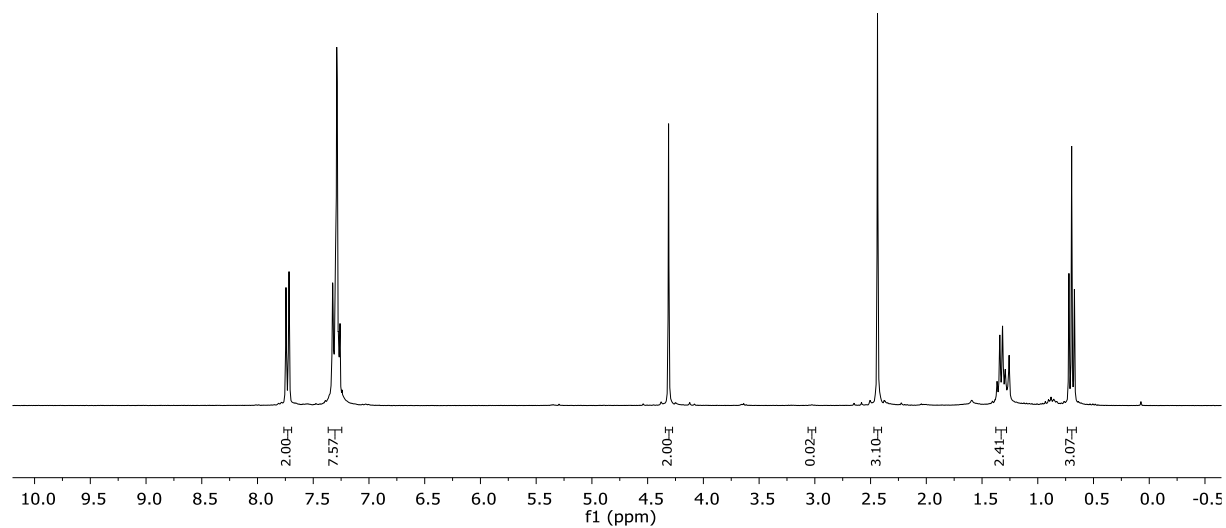

**Figure S59.** <sup>1</sup>H NMR spectrum of **13i<sub>d2</sub>**.

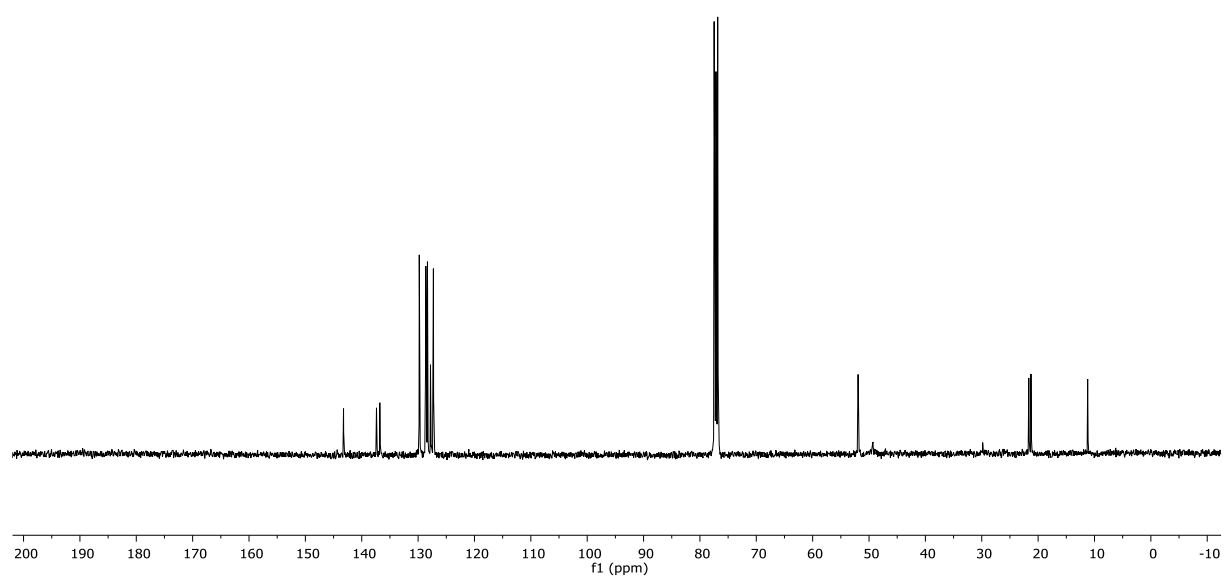

**Figure S60.** <sup>13</sup>C NMR spectrum of **13i<sub>d2</sub>**.

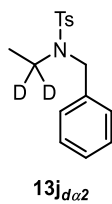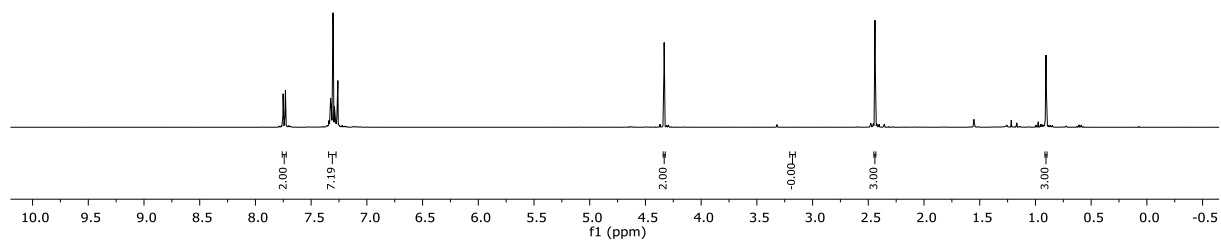

Figure S61. <sup>1</sup>H NMR spectrum of 13jda2.

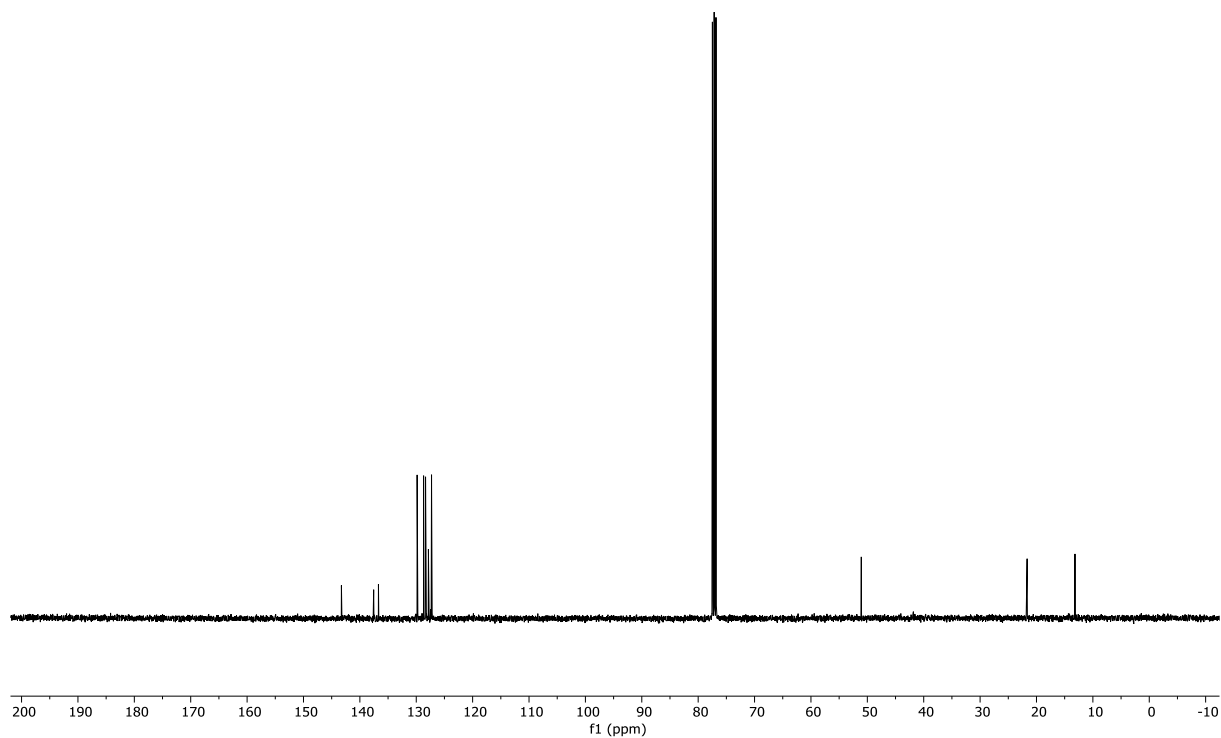

Figure S62. <sup>13</sup>C NMR spectrum of 13jda2.

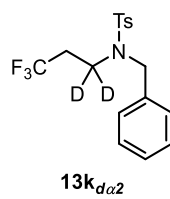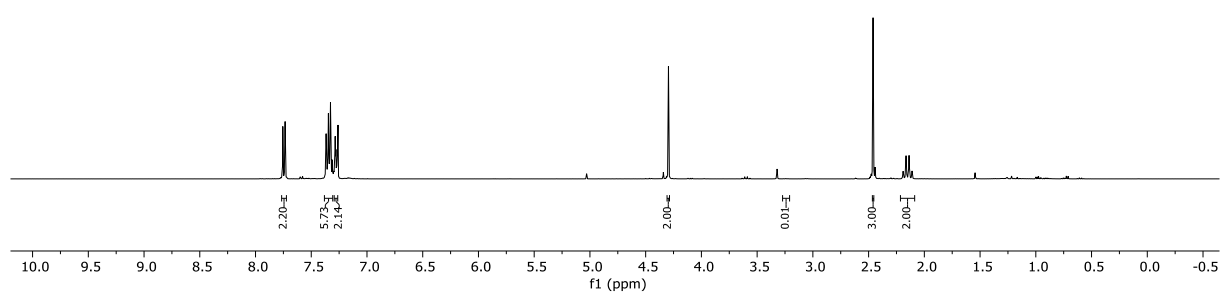

Figure S63. <sup>1</sup>H NMR spectrum of **13k<sub>da2</sub>**.

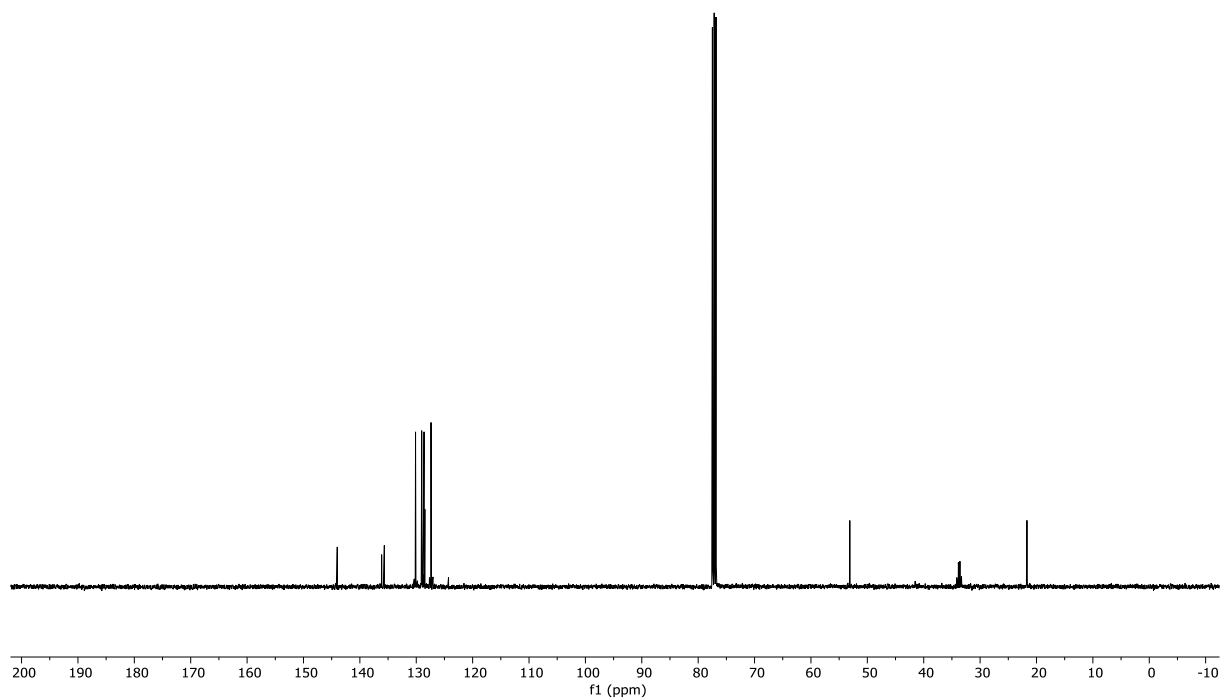

Figure S64. <sup>13</sup>C NMR spectrum of **13k<sub>da2</sub>**.

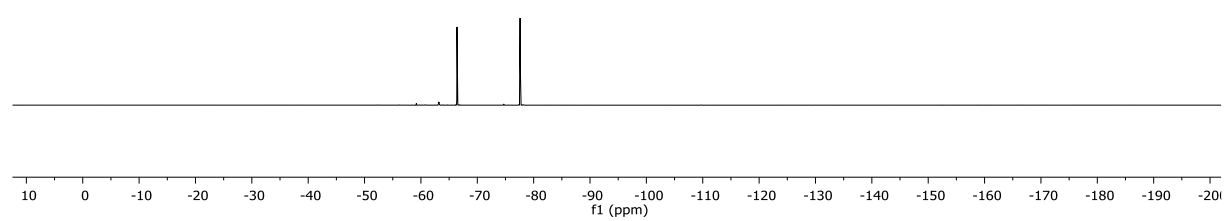

**Figure S65.**  $^{19}\text{F}$  NMR spectrum of **13k<sub>d2</sub>**.

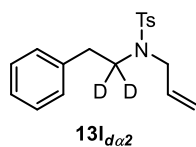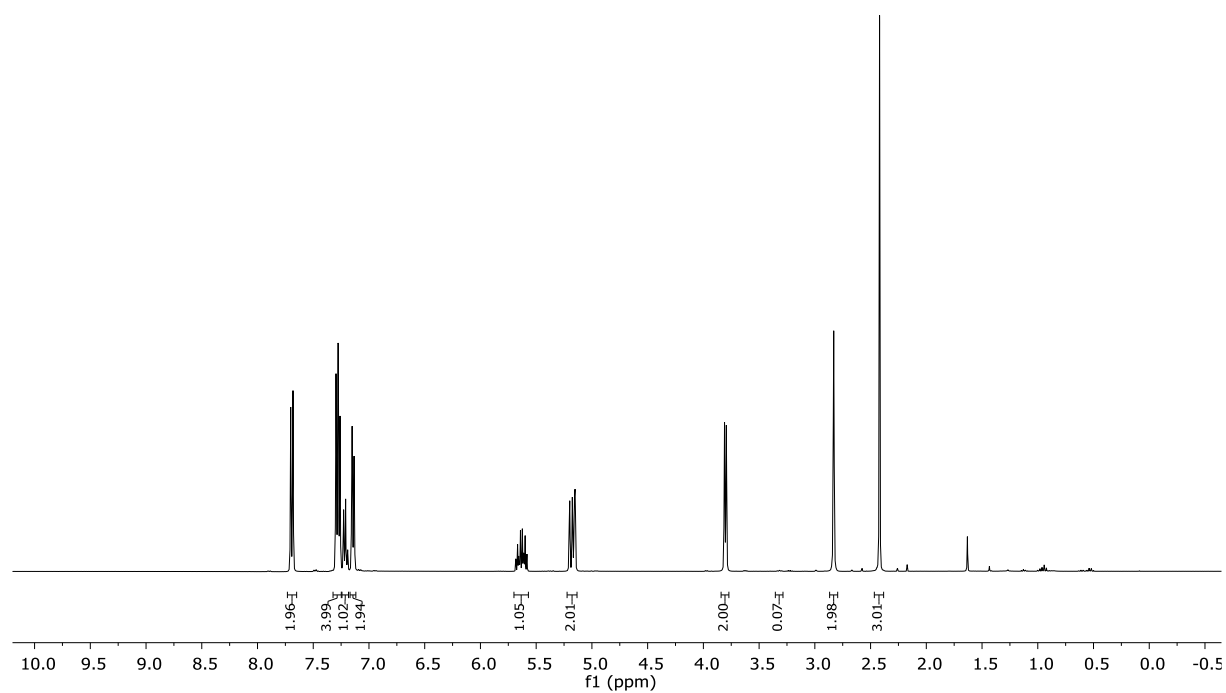

Figure S66. <sup>1</sup>H NMR spectrum of **131<sub>da2</sub>**.

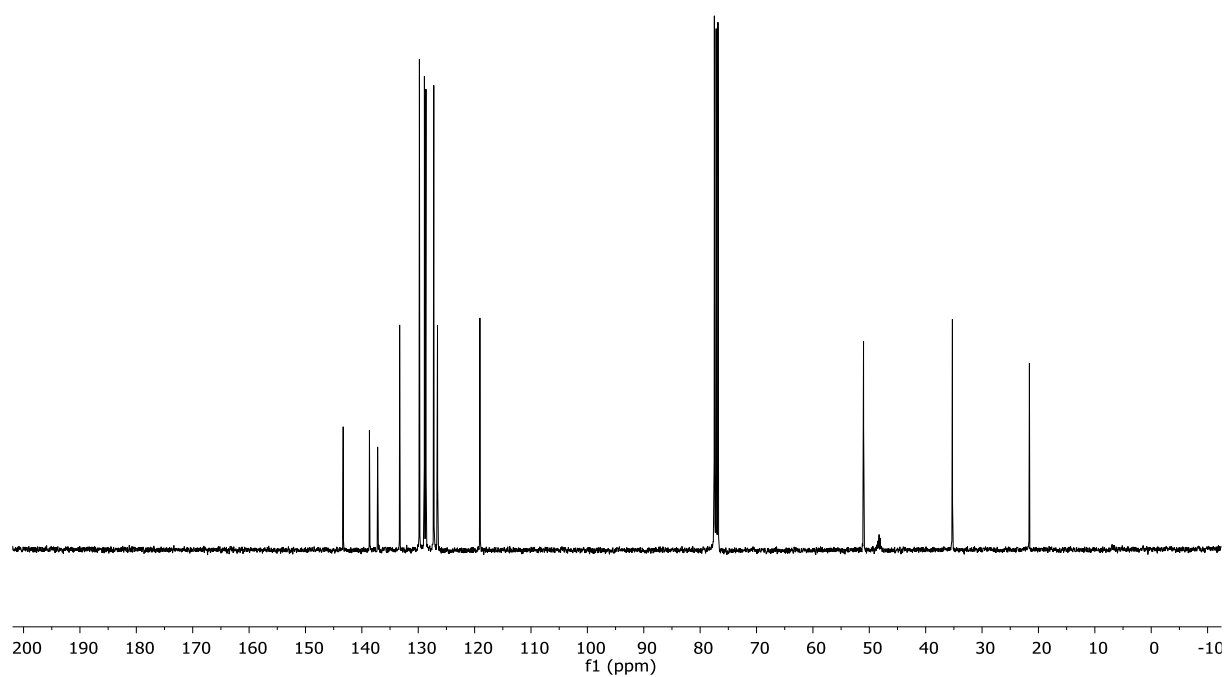

Figure S67. <sup>13</sup>C NMR spectrum of **131<sub>da2</sub>**.

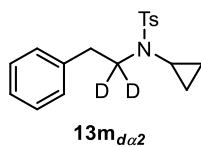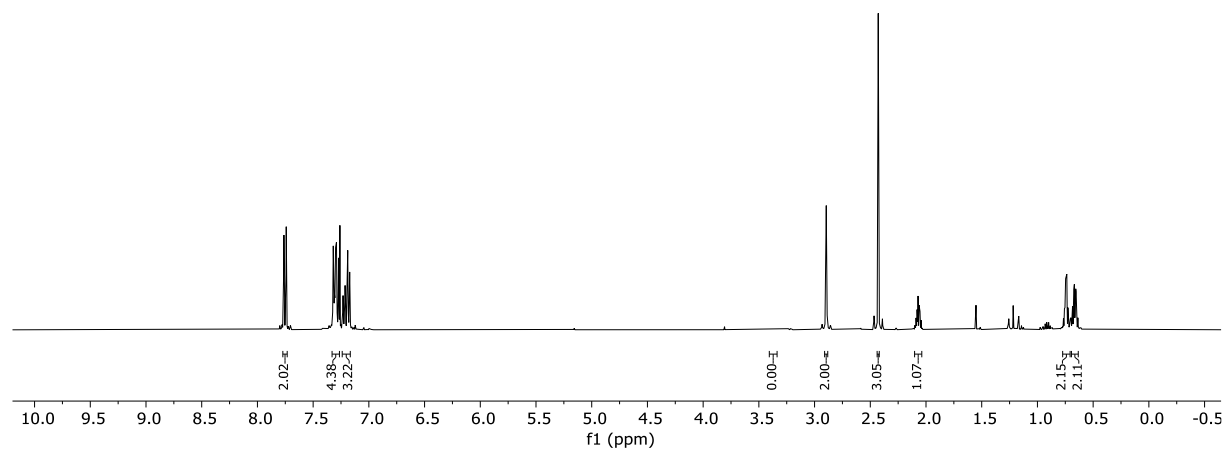

Figure S68. <sup>1</sup>H NMR spectrum of 13m<sub>dα2</sub>.

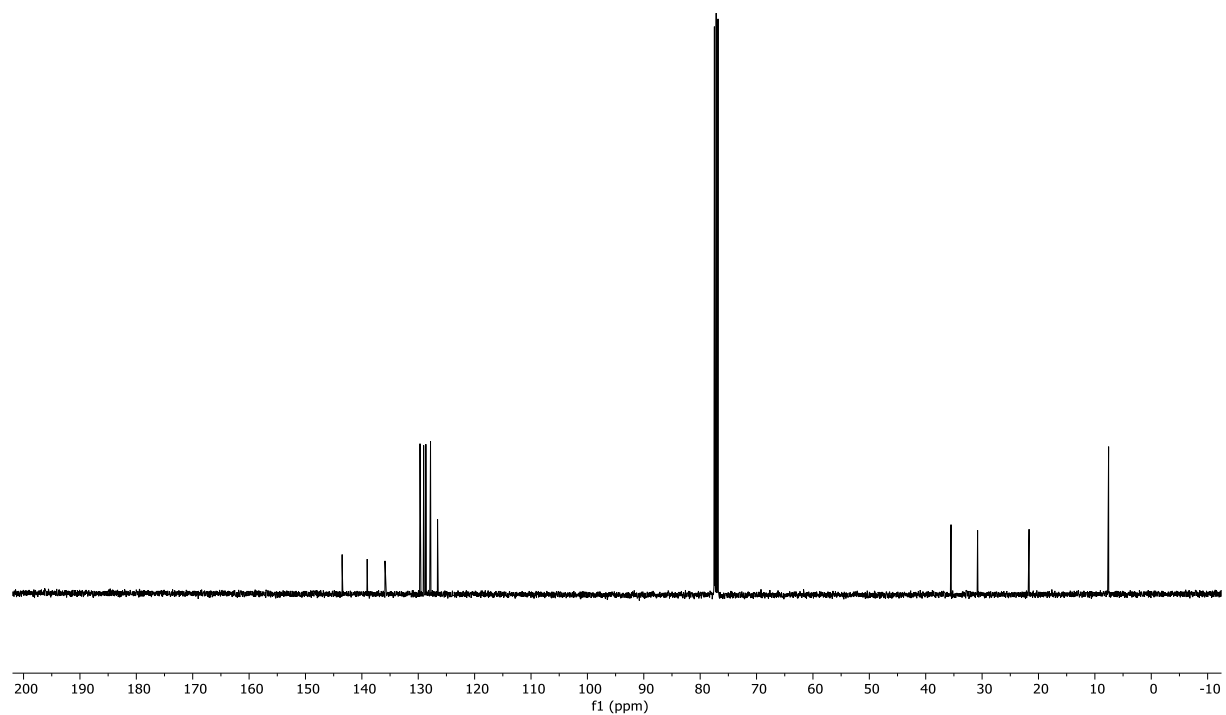

Figure S69. <sup>13</sup>C NMR spectrum of 13m<sub>dα2</sub>.

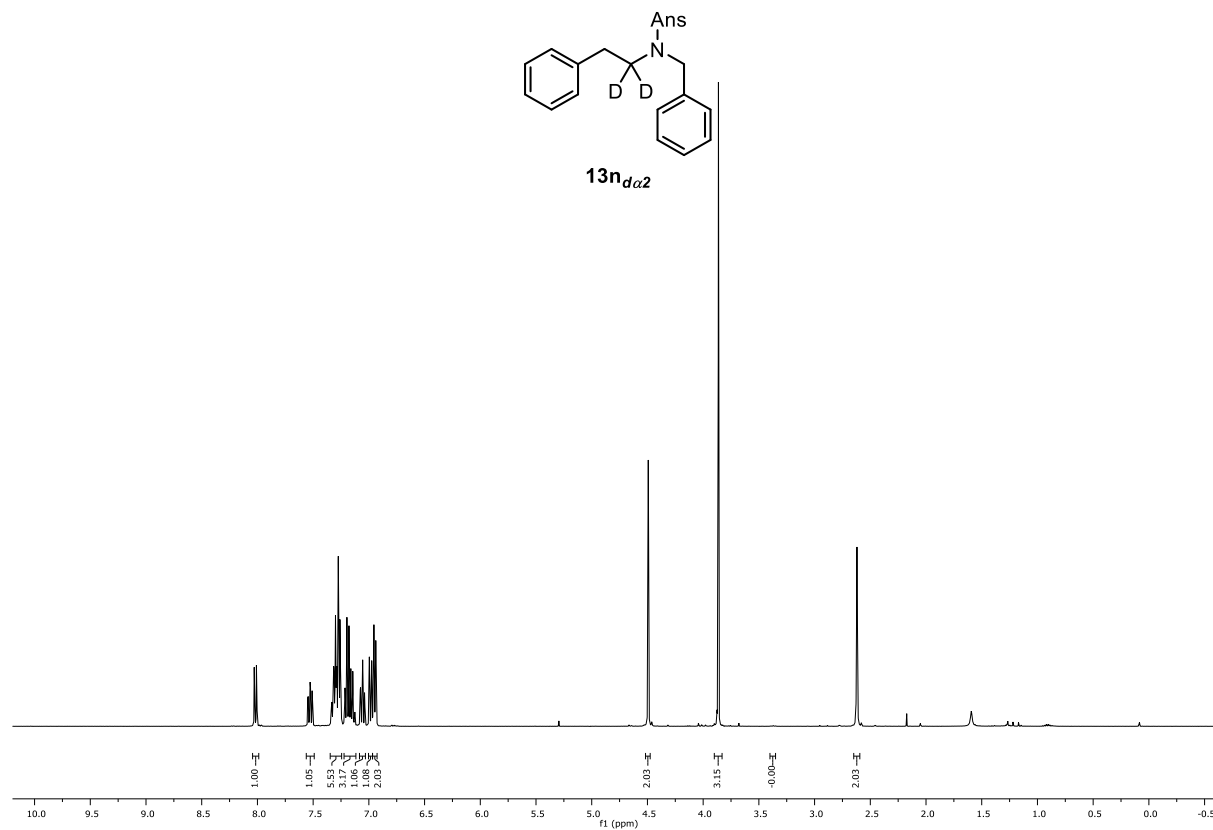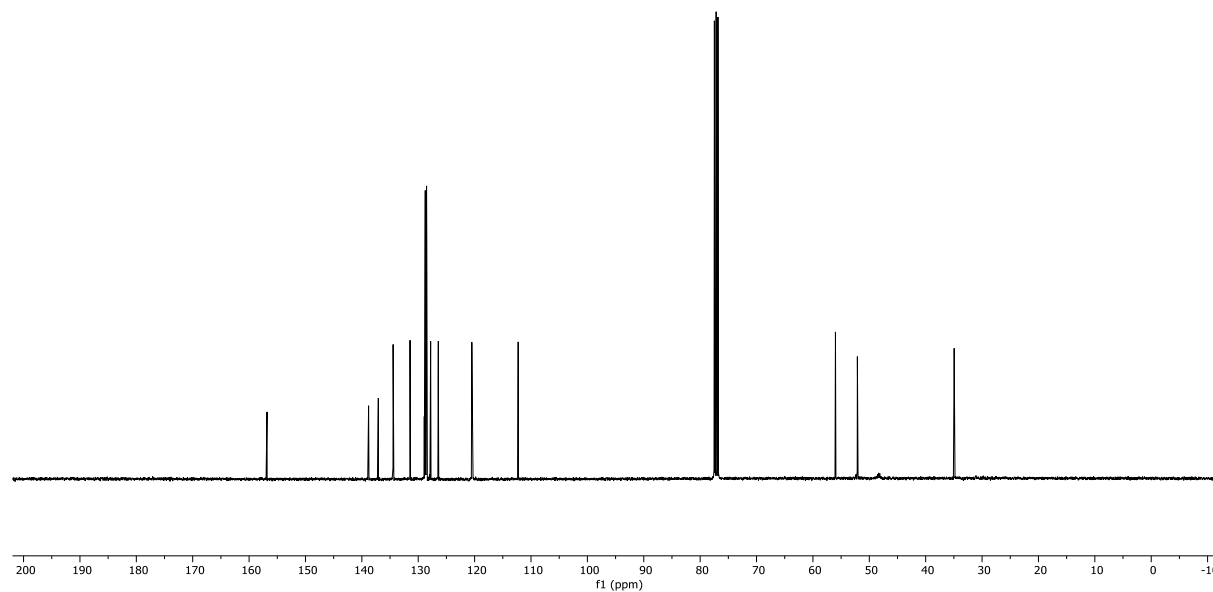



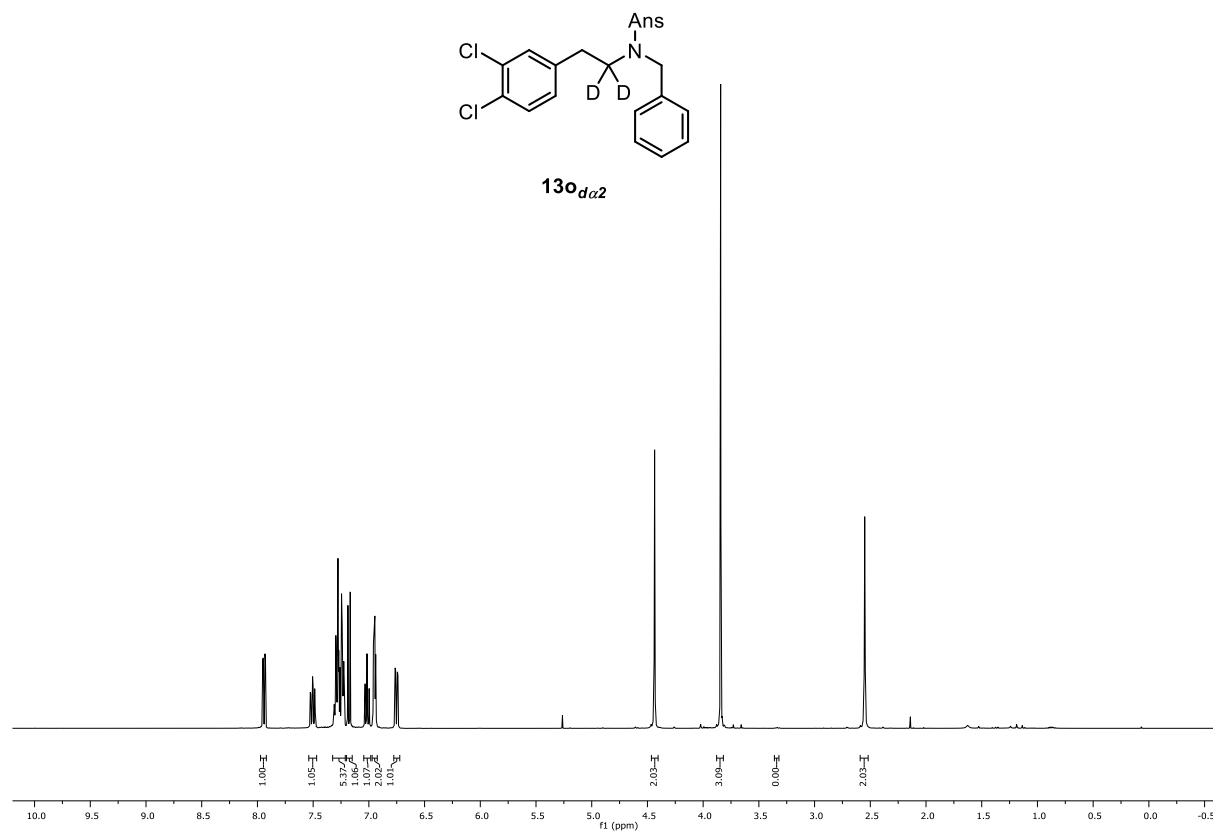

Figure S72. <sup>1</sup>H NMR spectrum of **13o<sub>d2</sub>**.

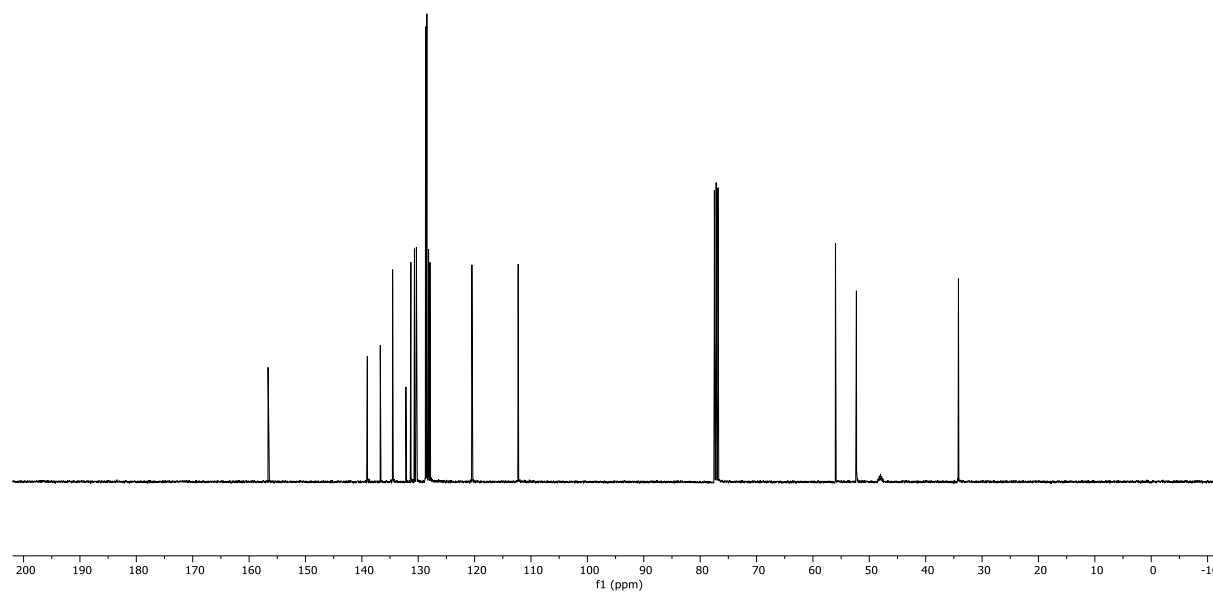

Figure S73. <sup>13</sup>C NMR spectrum of **13o<sub>d2</sub>**.

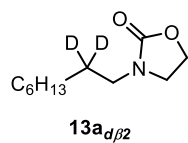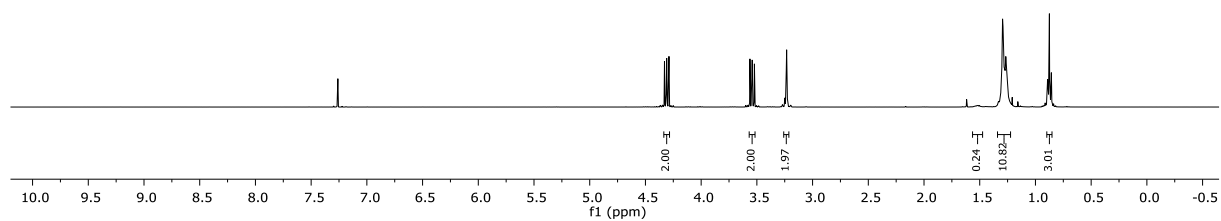

Figure S74. <sup>1</sup>H NMR spectrum of **13a<sub>dβ2</sub>**.

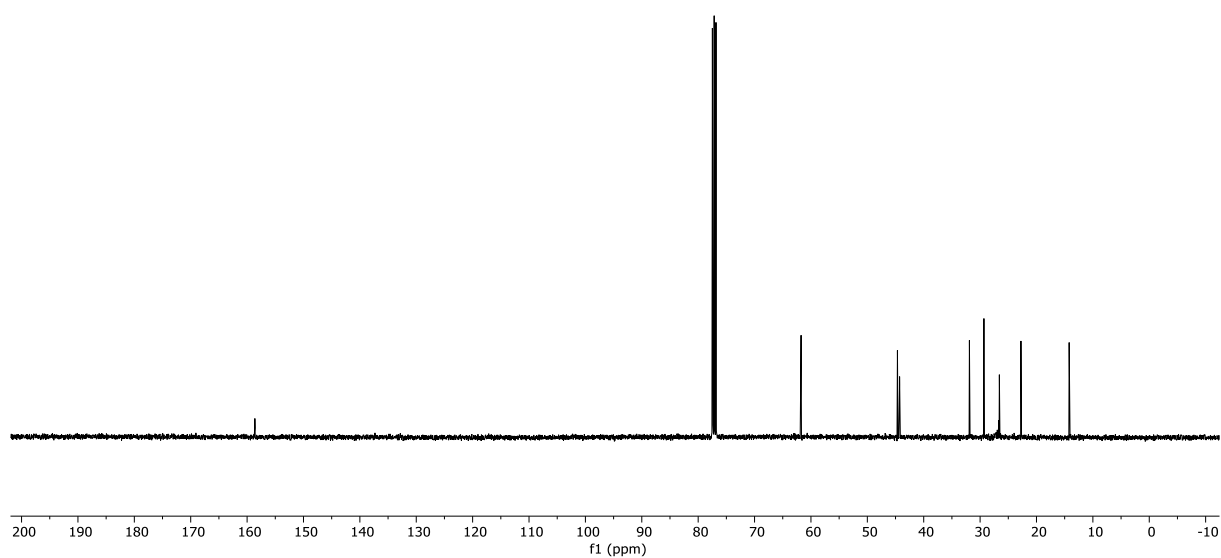

Figure S75. <sup>13</sup>C NMR spectrum of **13a<sub>dβ2</sub>**.

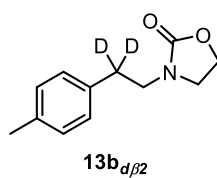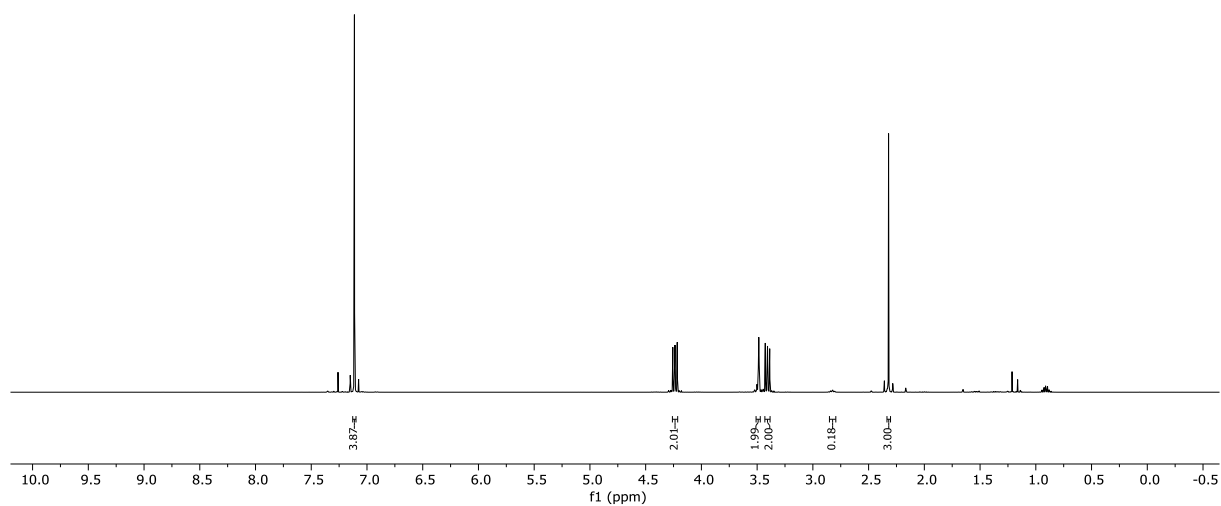

Figure S76. <sup>1</sup>H NMR spectrum of **13b<sub>dβ2</sub>**.

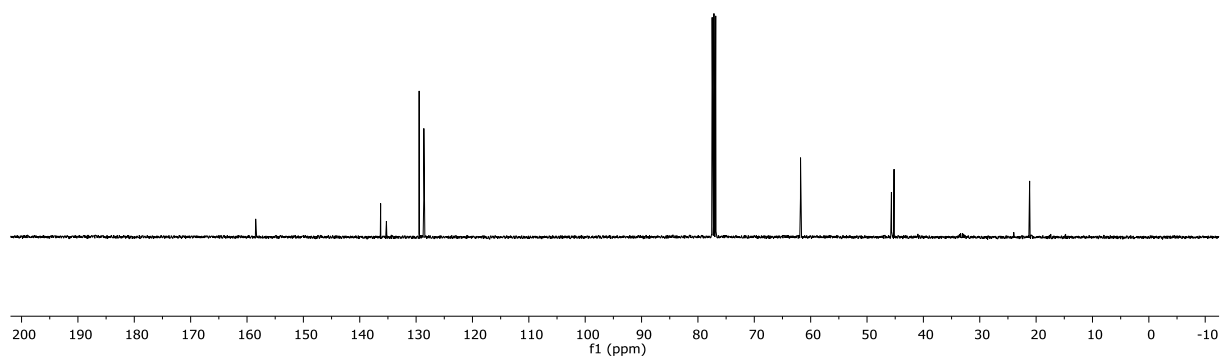

Figure S77. <sup>13</sup>C NMR spectrum of **13b<sub>dβ2</sub>**.

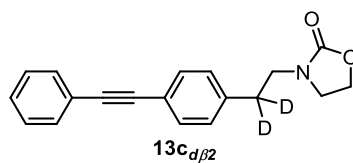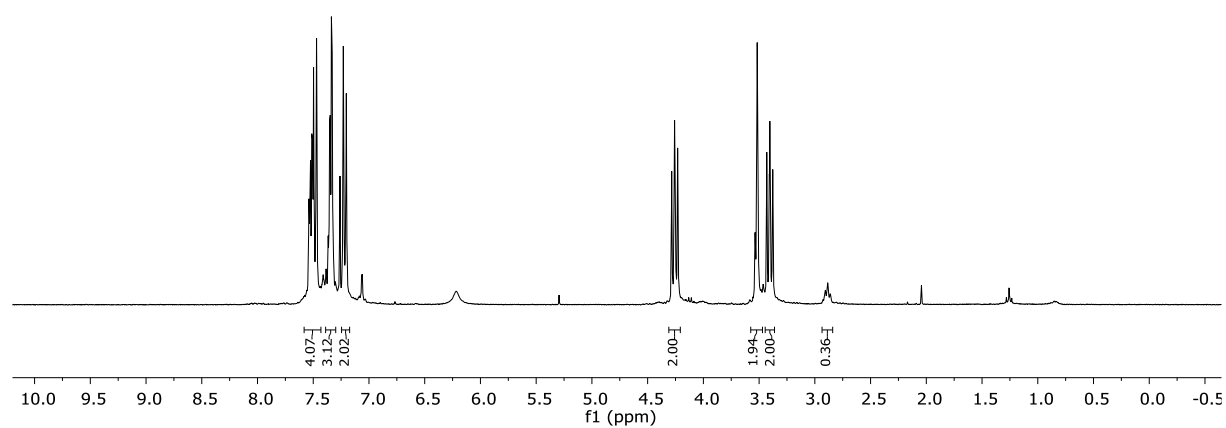

Figure S78. <sup>1</sup>H NMR spectrum of **13c<sub>dβ2</sub>**.

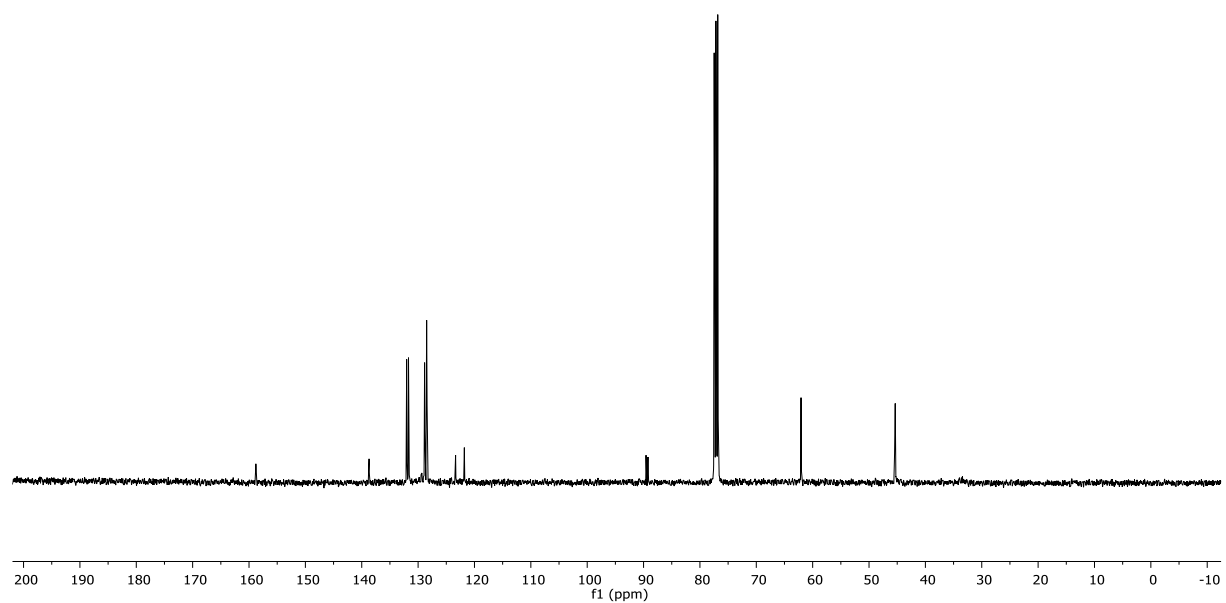

Figure S79. <sup>13</sup>C NMR spectrum of **13c<sub>dβ2</sub>**.

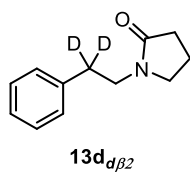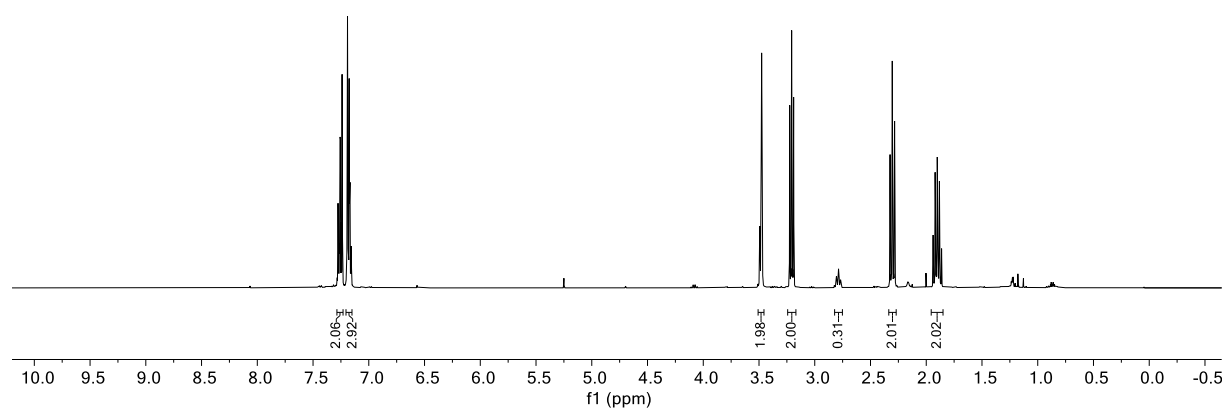

**Figure S80.** <sup>1</sup>H NMR spectrum of **13d<sub>dβ2</sub>**.

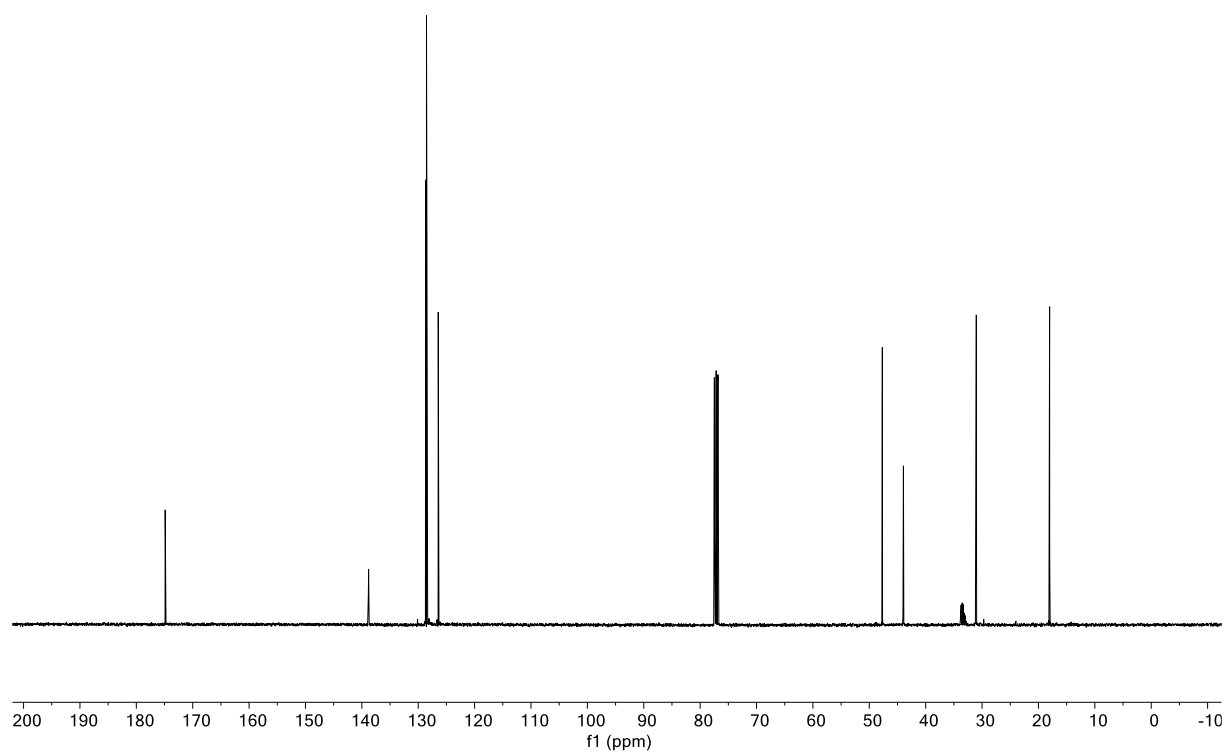

**Figure S81.** <sup>13</sup>C NMR spectrum of **13d<sub>dβ2</sub>**.

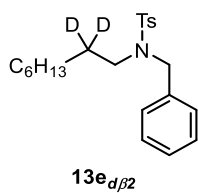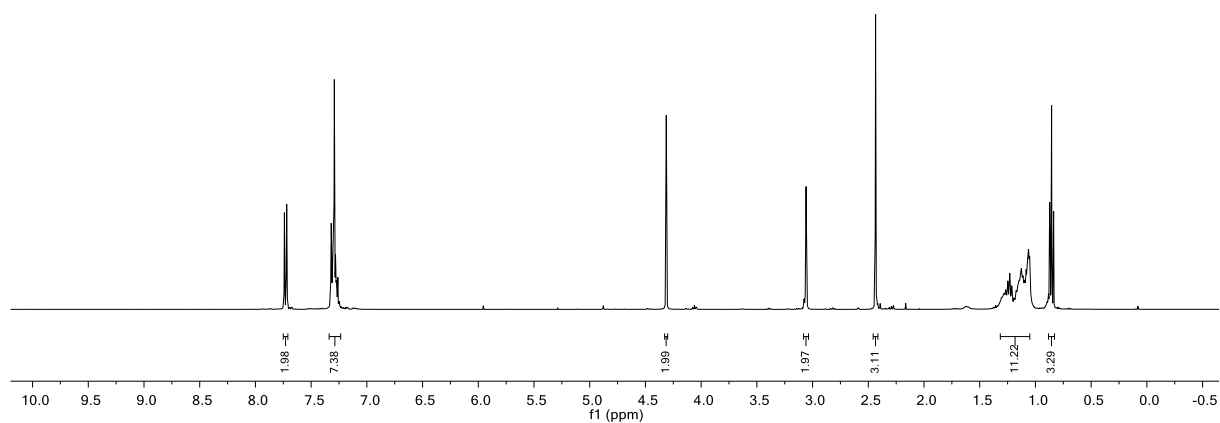

Figure S82. <sup>1</sup>H NMR spectrum of **13e<sub>dβ2</sub>**.

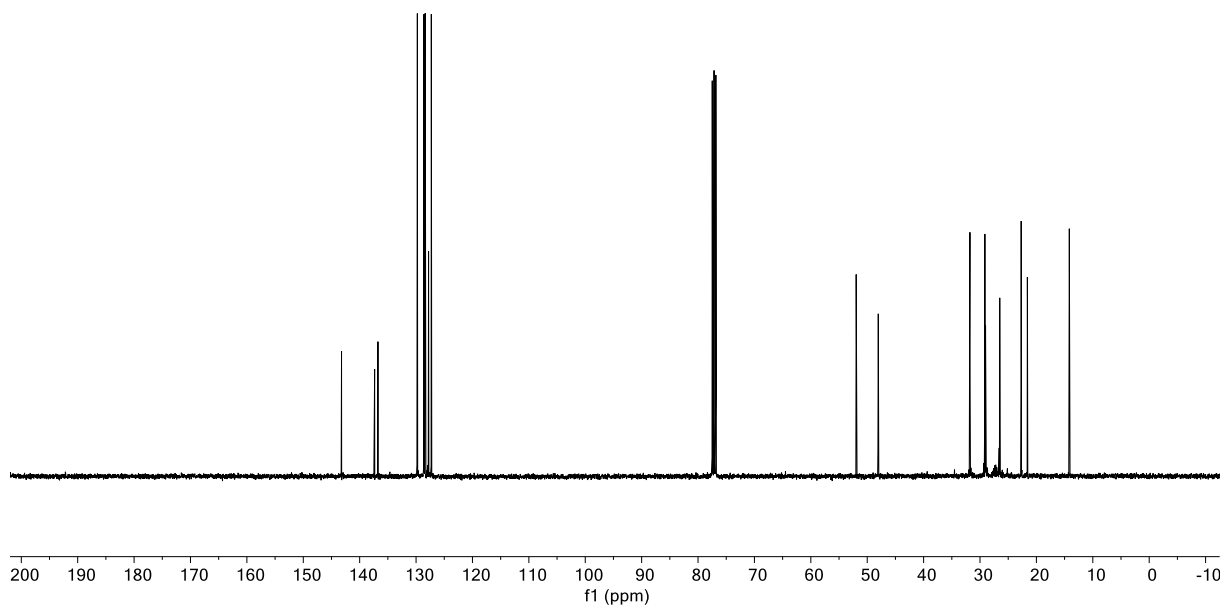

Figure S83. <sup>13</sup>C NMR spectrum of **13e<sub>dβ2</sub>**.

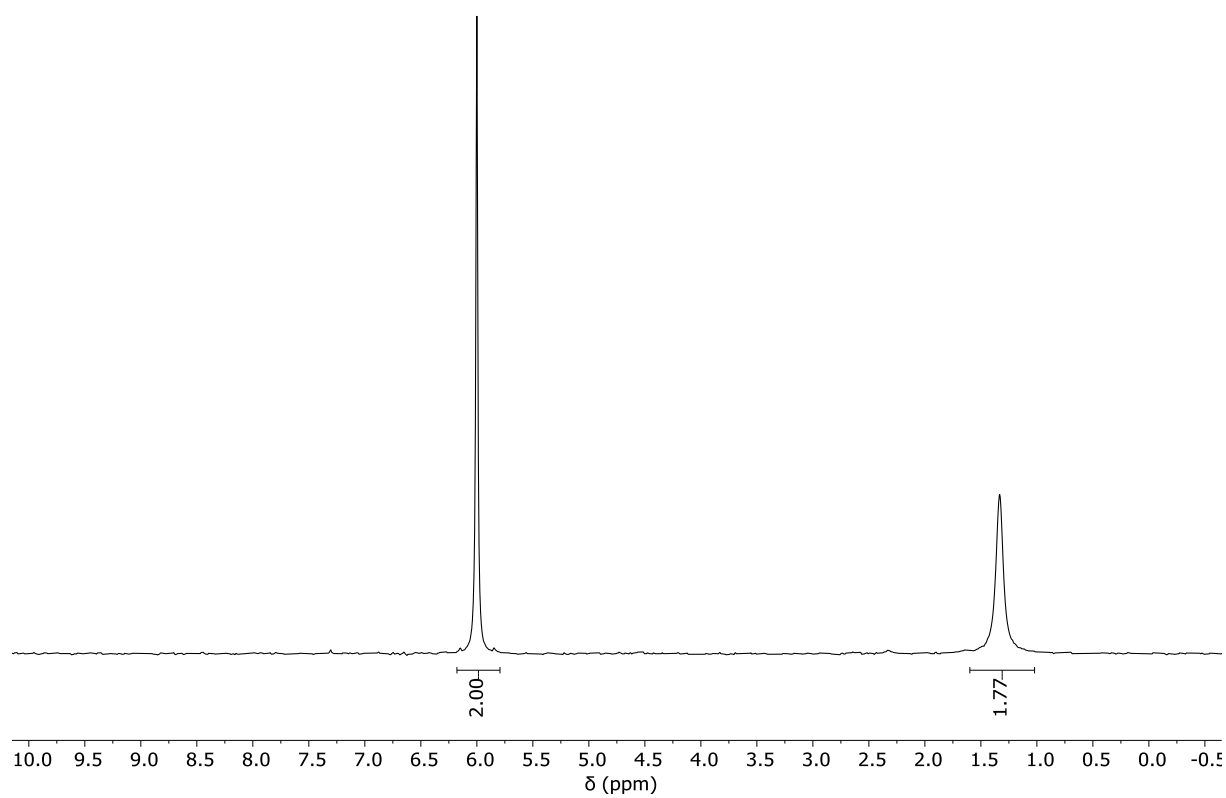

**Figure S84.**  $^2\text{H}$  NMR spectrum of  $13e_{d\beta 2}$ .

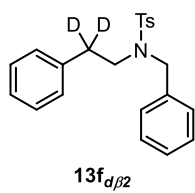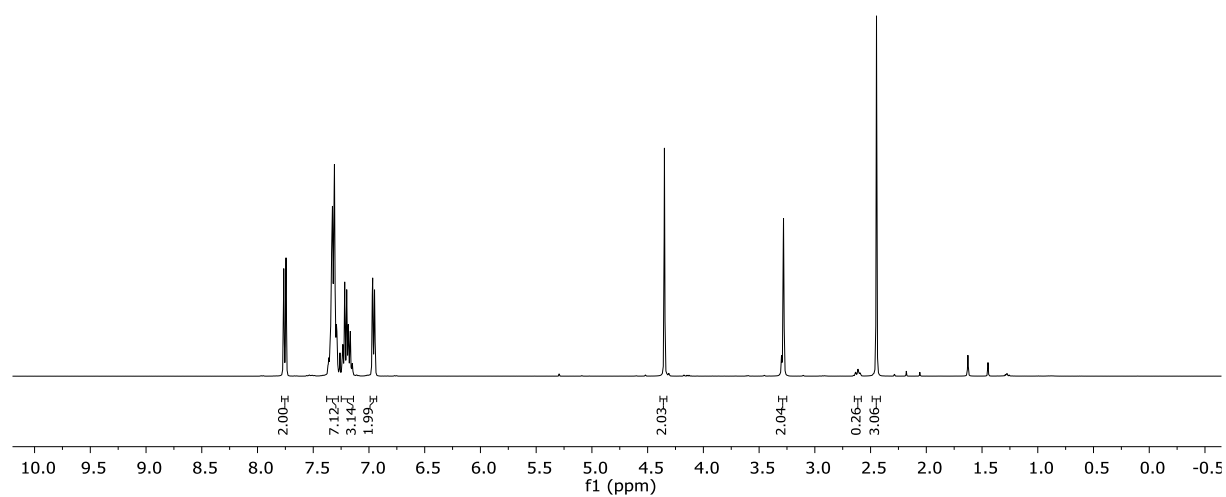

Figure S85. <sup>1</sup>H NMR spectrum of **13f<sub>dβ2</sub>**.

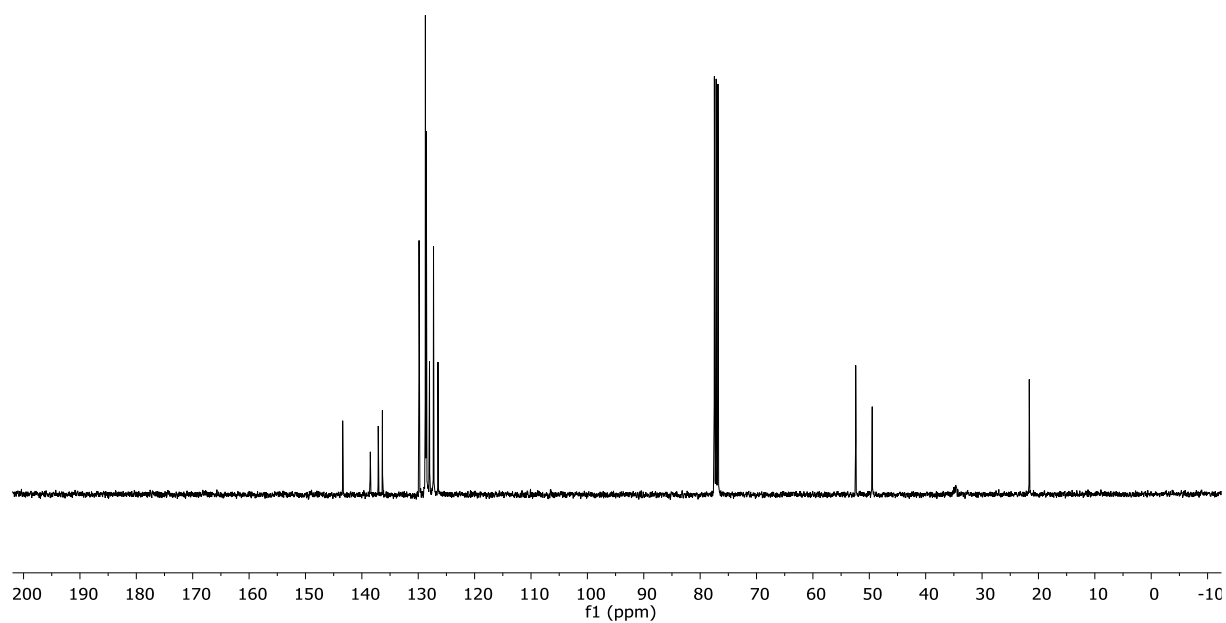

Figure S86. <sup>13</sup>C NMR spectrum of **13f<sub>dβ2</sub>**.



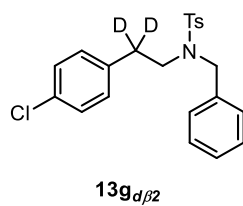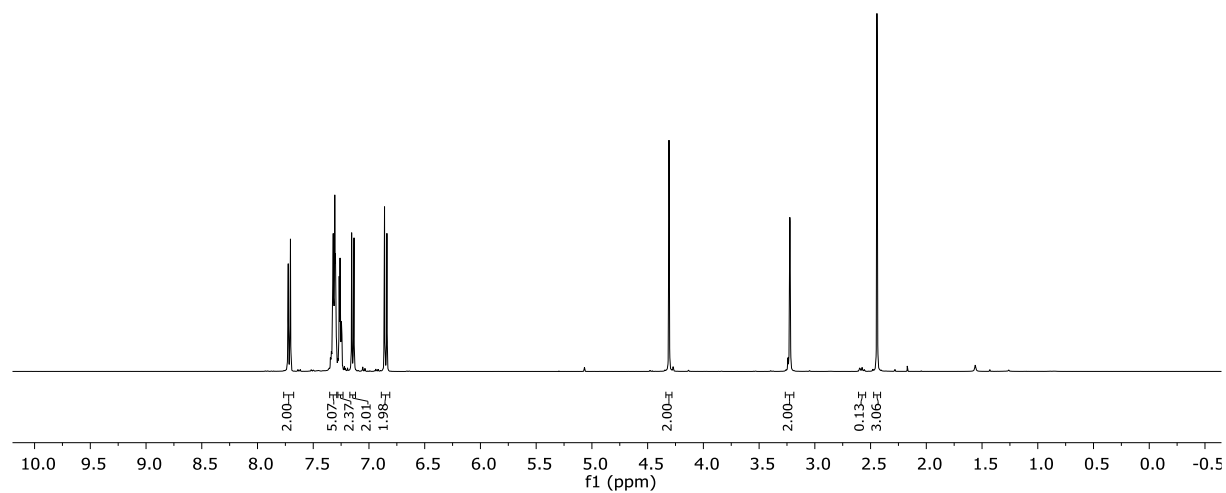

Figure S87. <sup>1</sup>H NMR spectrum of **13g<sub>dβ2</sub>**.

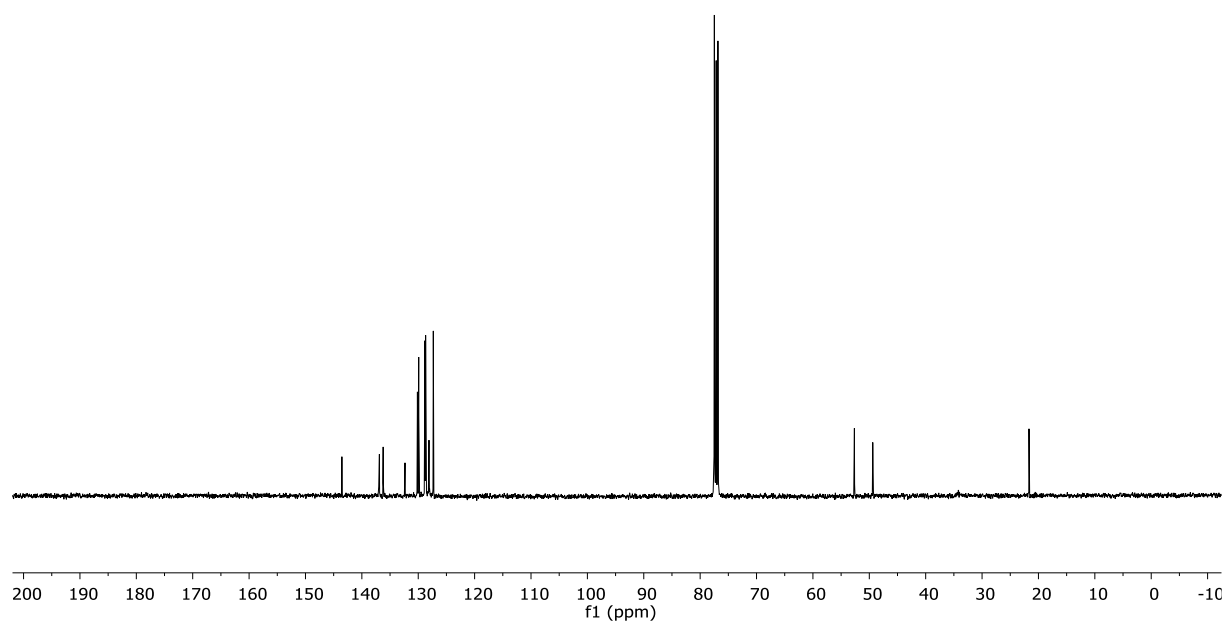

Figure S88. <sup>13</sup>C NMR spectrum of **13g<sub>dβ2</sub>**.

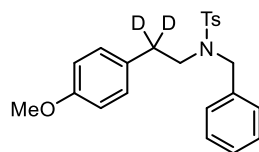

13h<sub>dβ2</sub>

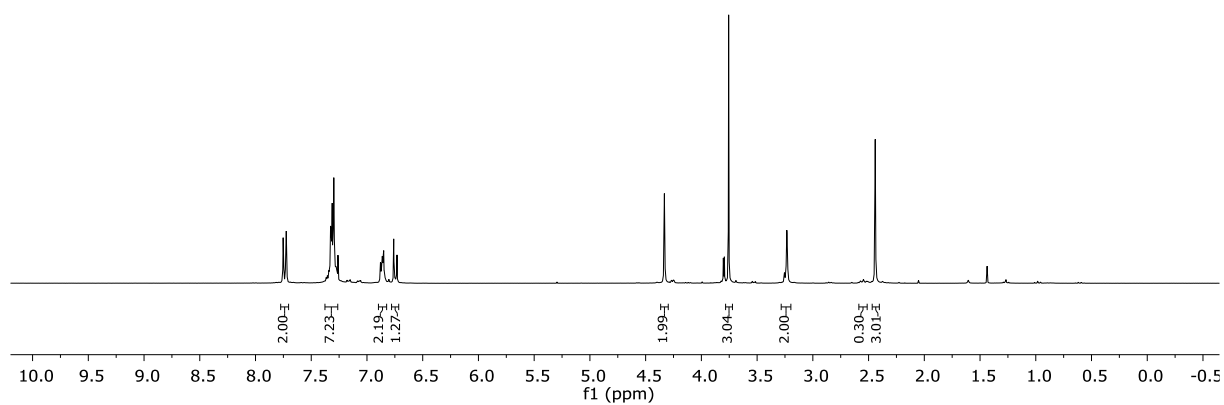

Figure S89. <sup>1</sup>H NMR spectrum of 13h<sub>dβ2</sub>.

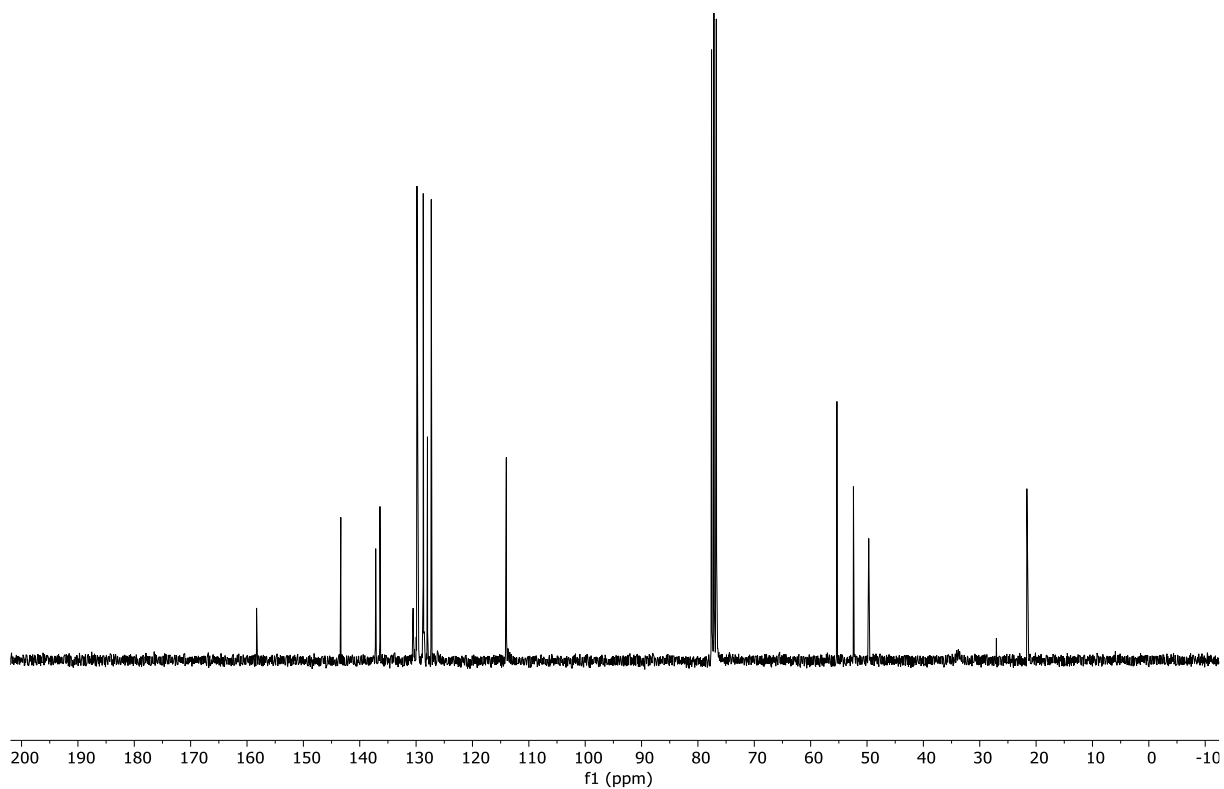

Figure S90. <sup>13</sup>C NMR spectrum of 13h<sub>dβ2</sub>.

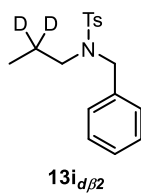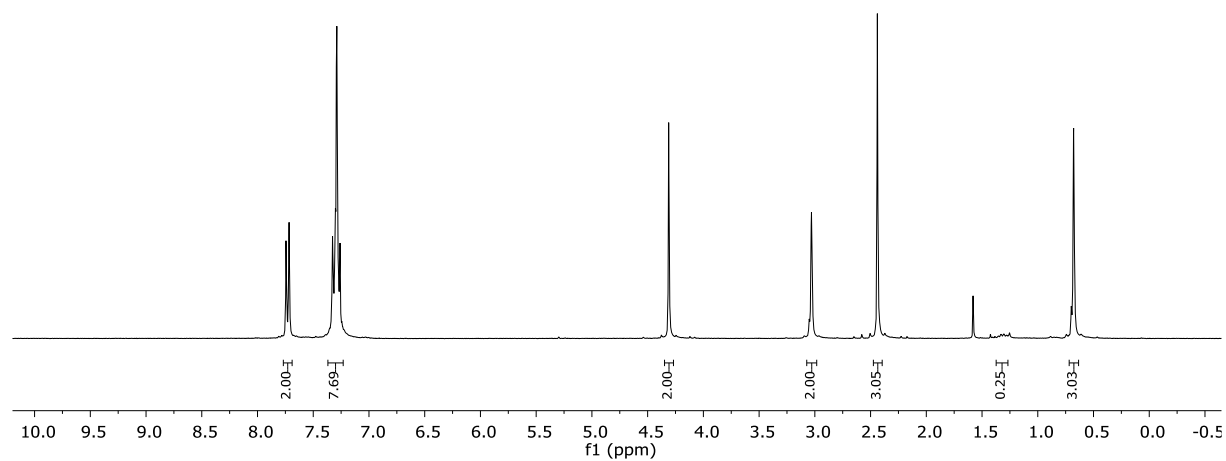

Figure S91. <sup>1</sup>H NMR spectrum of **13i<sub>dβ2</sub>**.

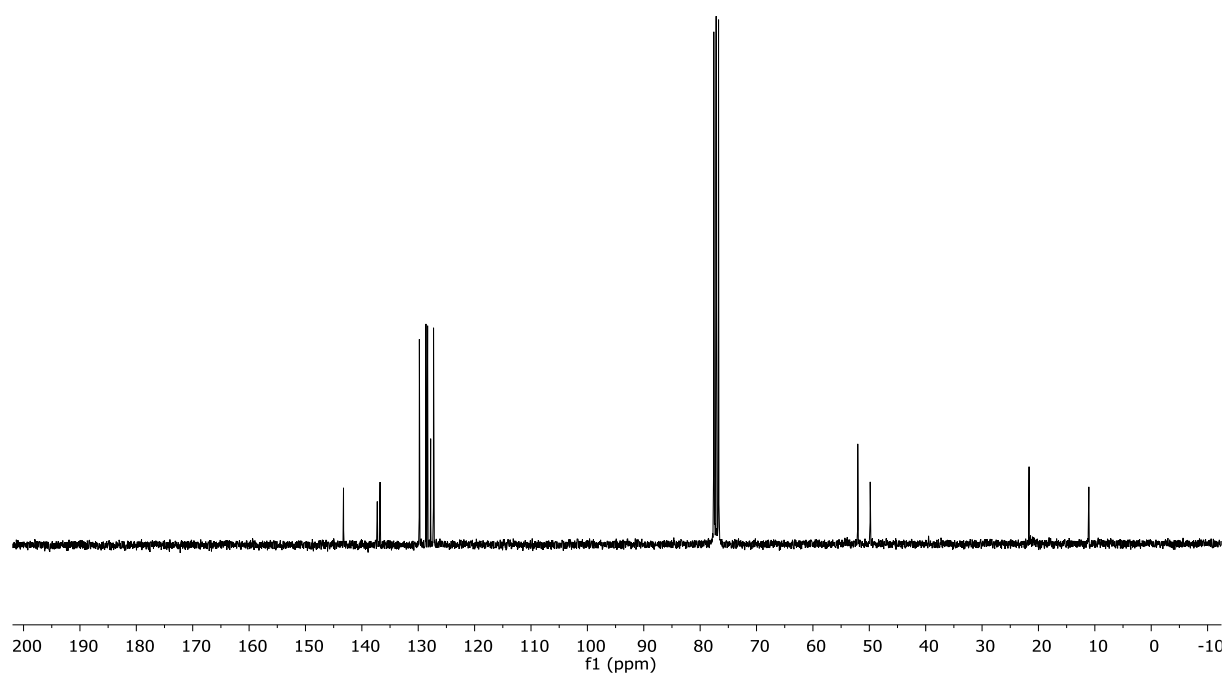

Figure S92. <sup>13</sup>C NMR spectrum of **13i<sub>dβ2</sub>**.

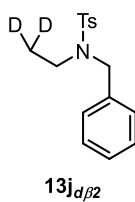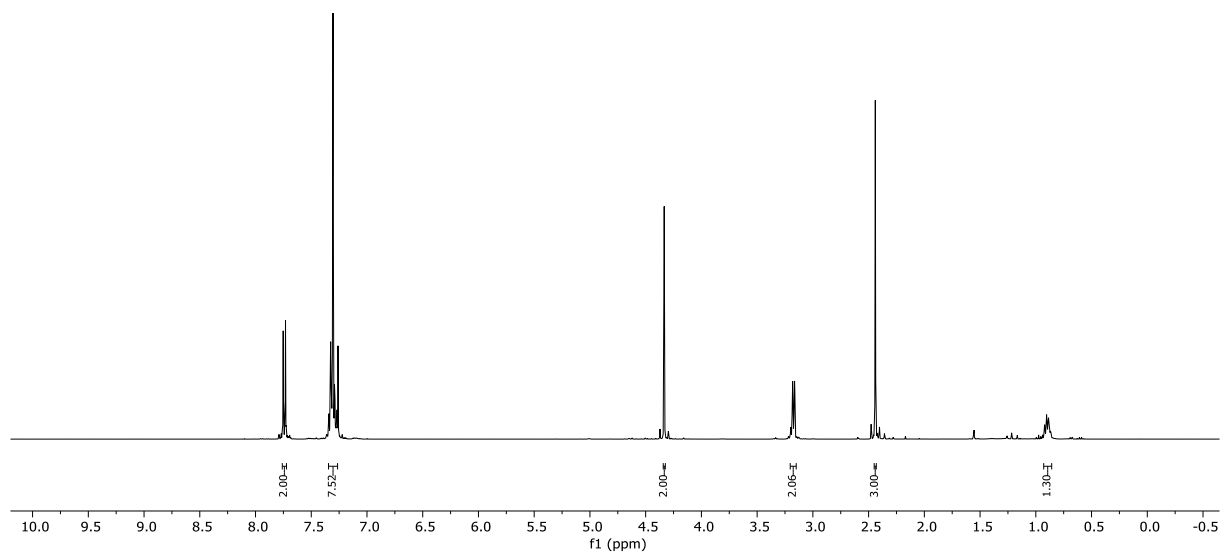

Figure S93. <sup>1</sup>H NMR spectrum of **13j<sub>dβ2</sub>**.

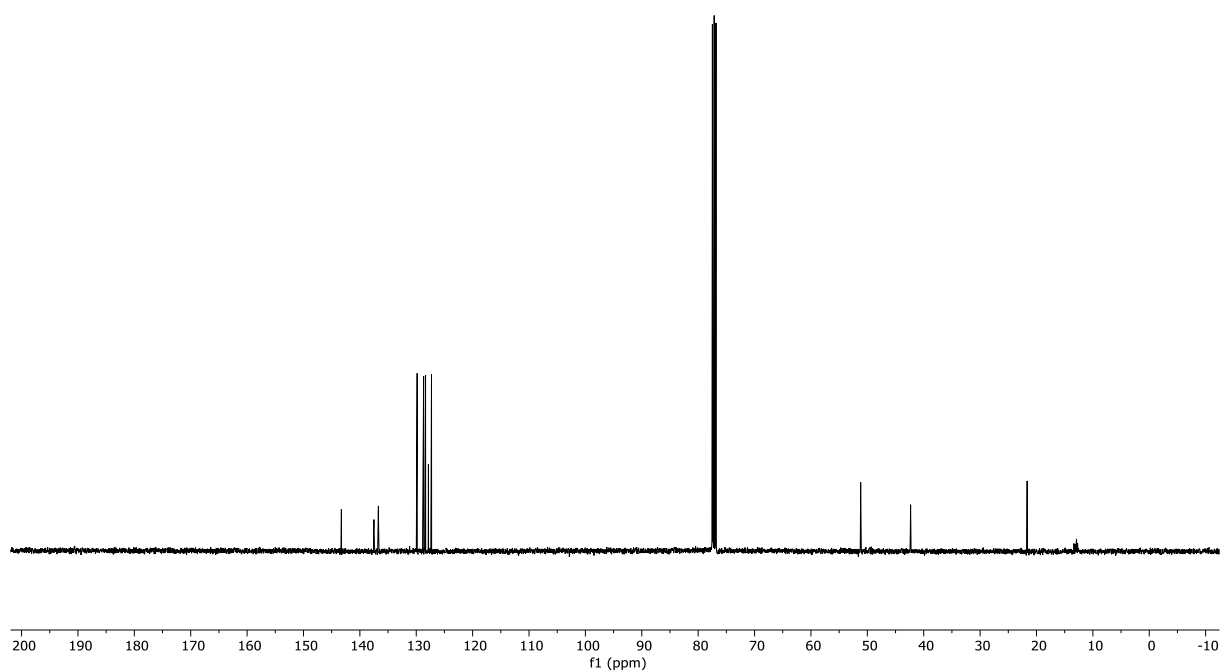

Figure S94. <sup>13</sup>C NMR spectrum of **13j<sub>dβ2</sub>**.

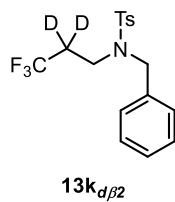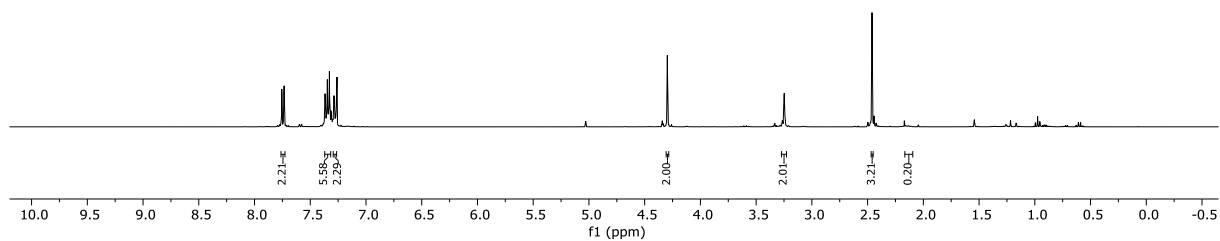

Figure S95. <sup>1</sup>H NMR spectrum of **13k<sub>dβ2</sub>**.

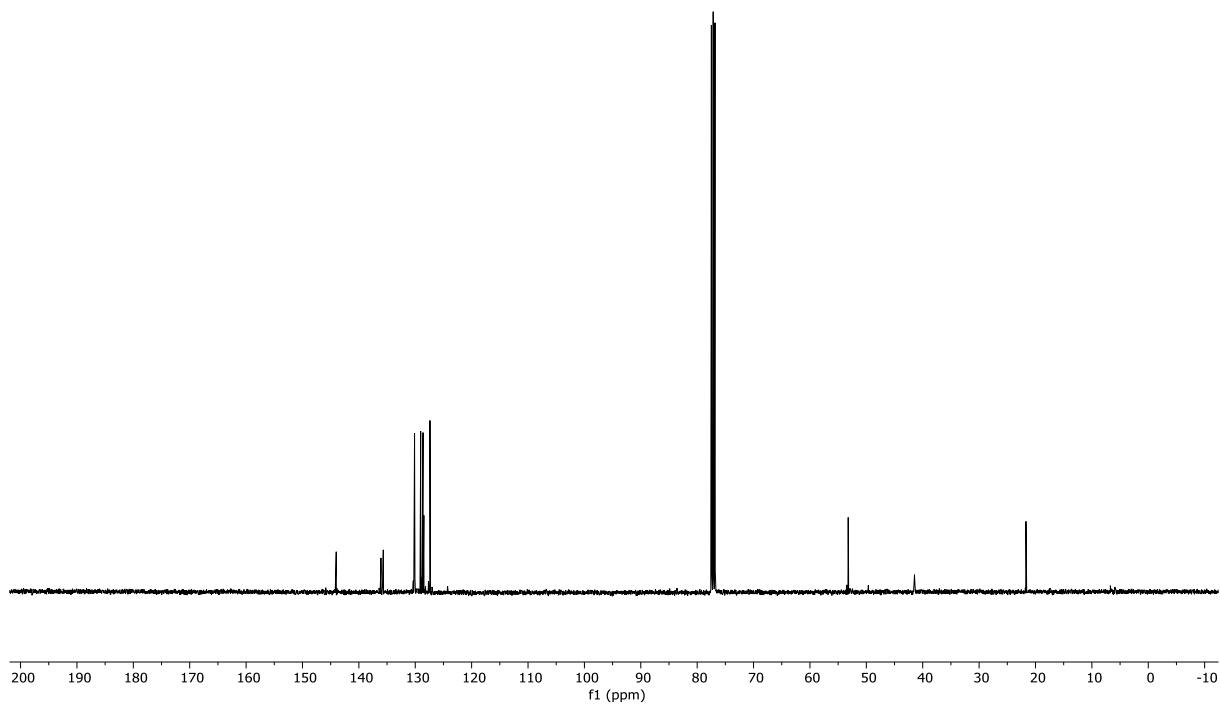

Figure S96. <sup>13</sup>C NMR spectrum of **13k<sub>dβ2</sub>**.

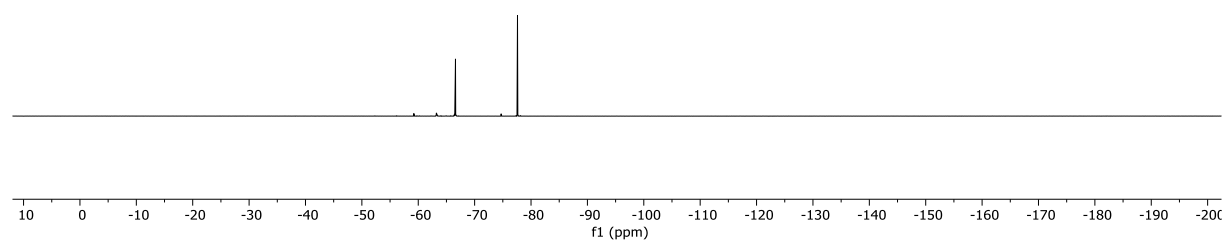

**Figure S97.**  $^{19}\text{F}$  NMR spectrum of  $13\text{k}_{d\beta 2}$ .

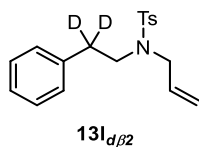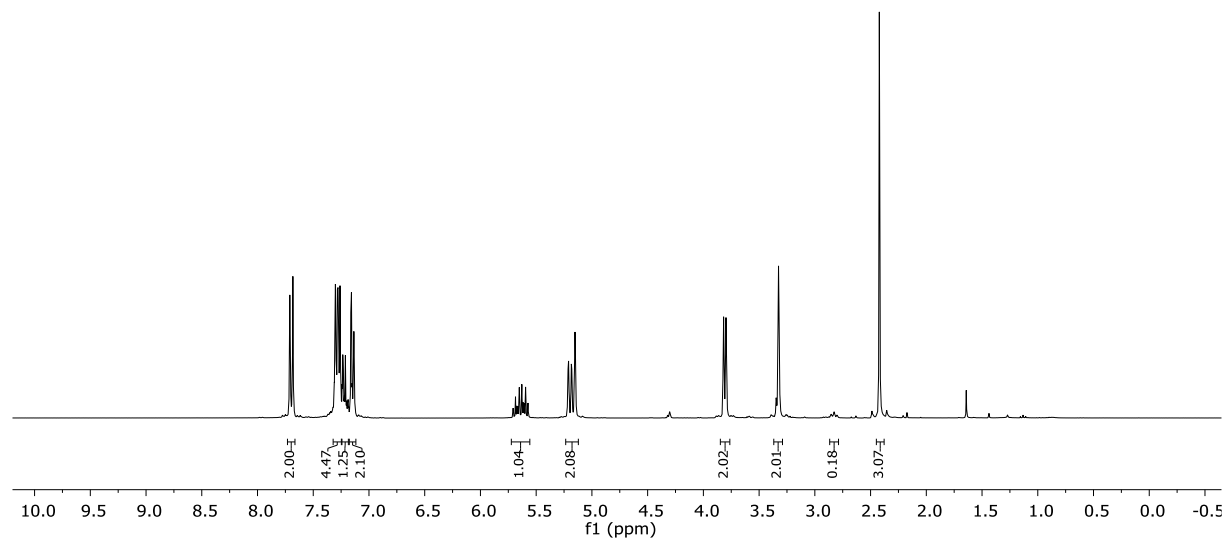

Figure S98. <sup>1</sup>H NMR spectrum of **131<sub>dβ2</sub>**.

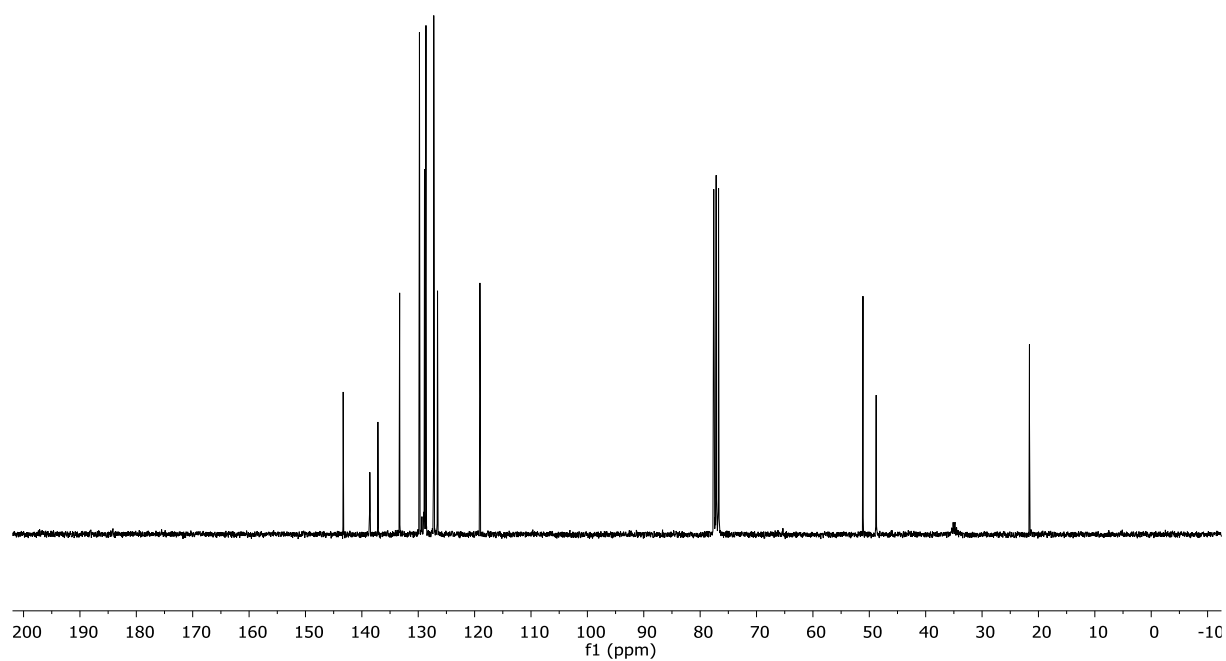

Figure S99. <sup>13</sup>C NMR spectrum of **131<sub>dβ2</sub>**.

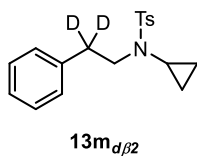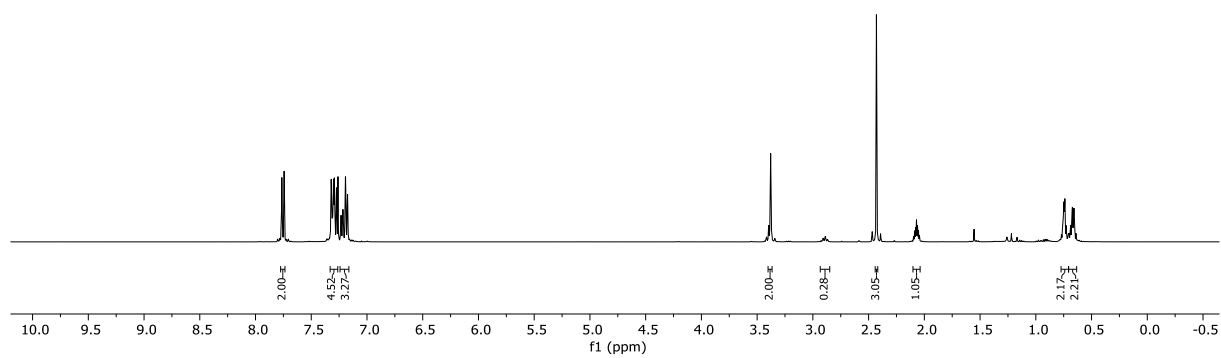

Figure S100. <sup>1</sup>H NMR spectrum of **13m<sub>dβ2</sub>**.

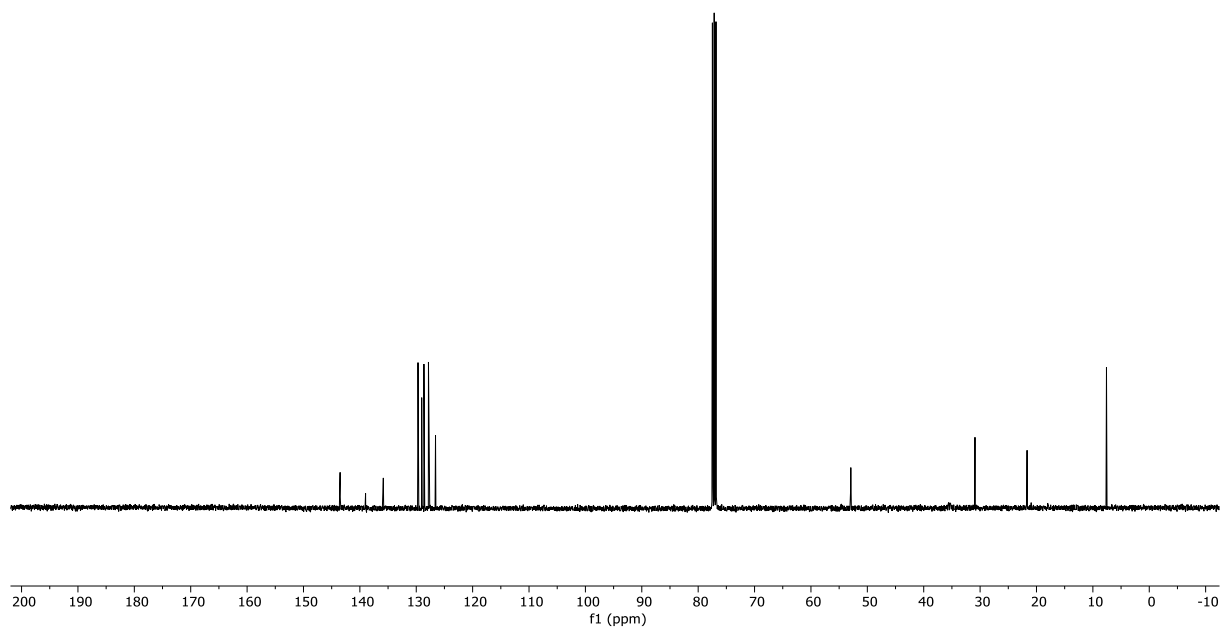

Figure S101. <sup>13</sup>C NMR spectrum of **13m<sub>dβ2</sub>**.



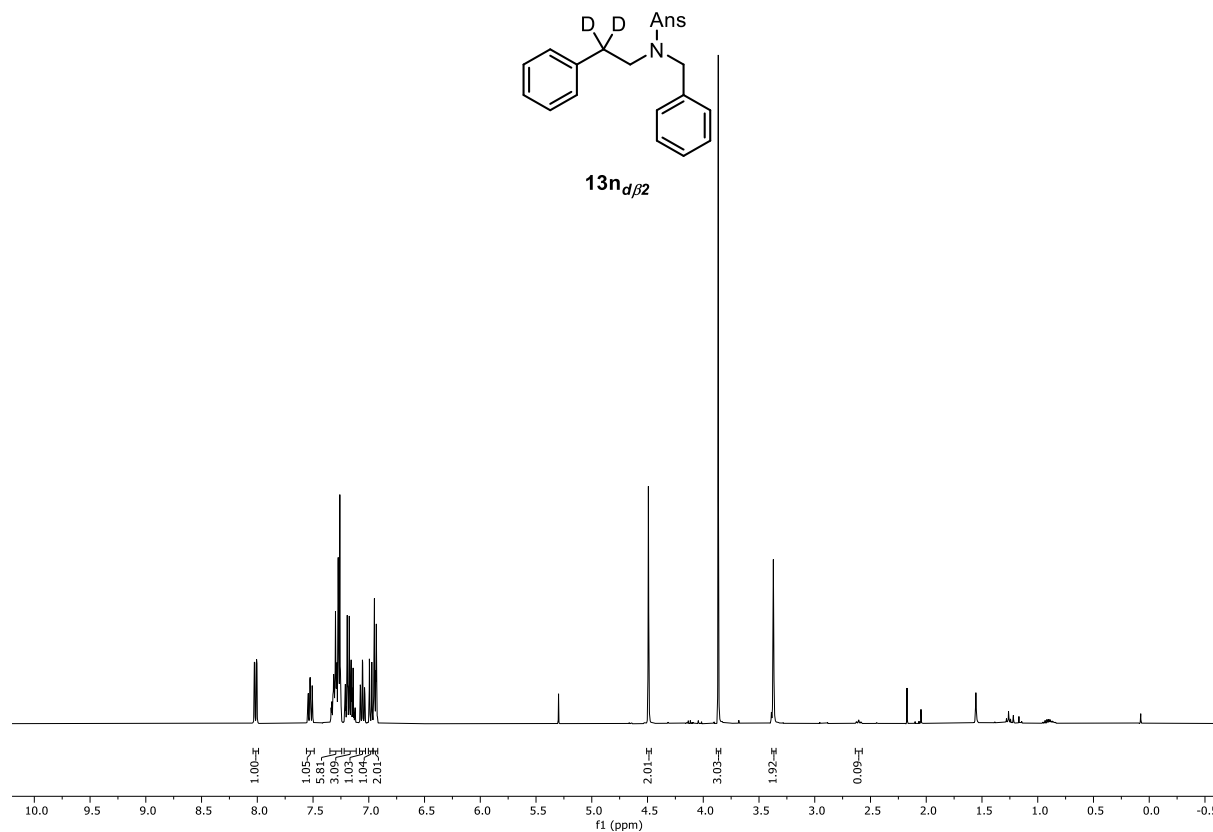

Figure S102. <sup>1</sup>H NMR spectrum of 13n<sub>dβ2</sub>.

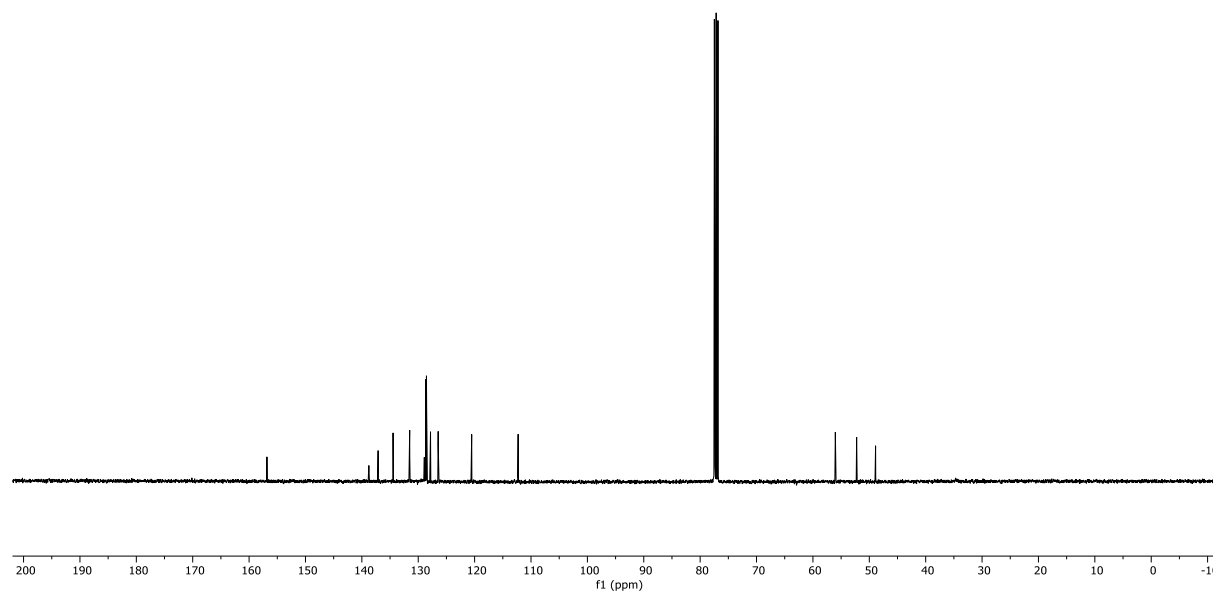

Figure S103. <sup>13</sup>C NMR spectrum of 13n<sub>dβ2</sub>.

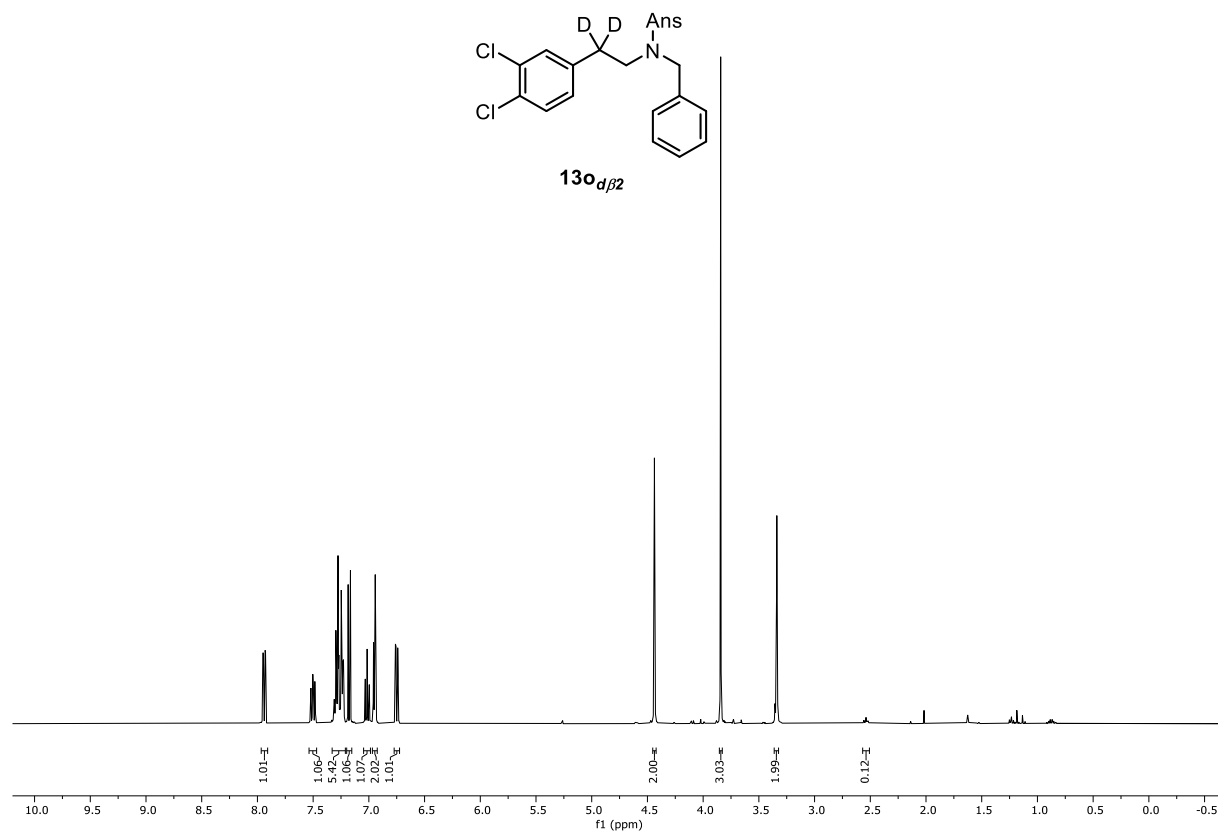

Figure S104. <sup>1</sup>H NMR spectrum of **13o<sub>d2</sub>**.

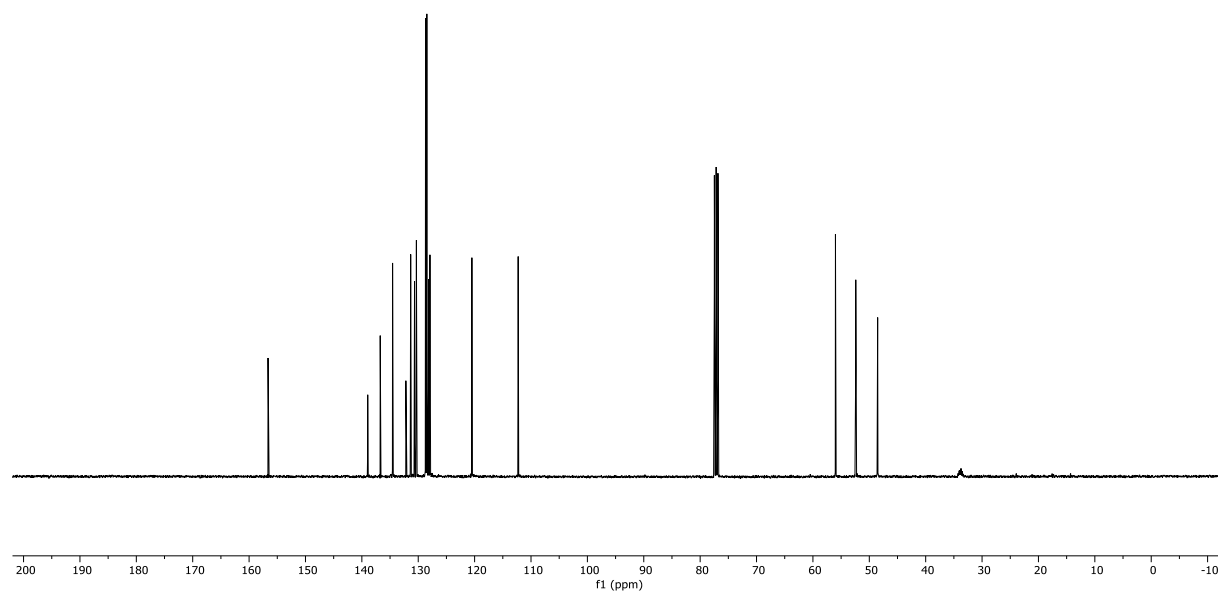

Figure S105. <sup>13</sup>C NMR spectrum of **13o<sub>d2</sub>**.

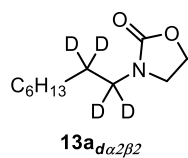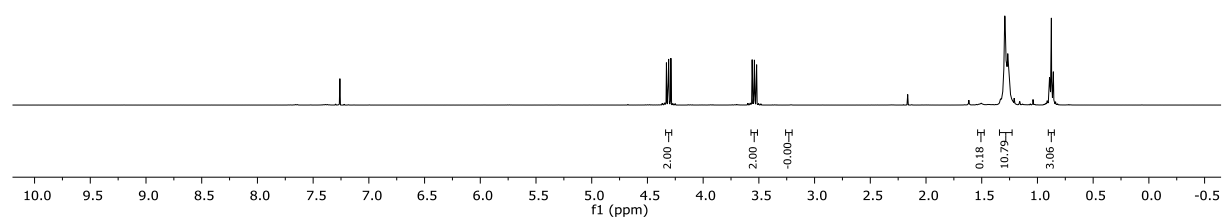

Figure S106. <sup>1</sup>H NMR spectrum of **13a<sub>d2β2</sub>**.

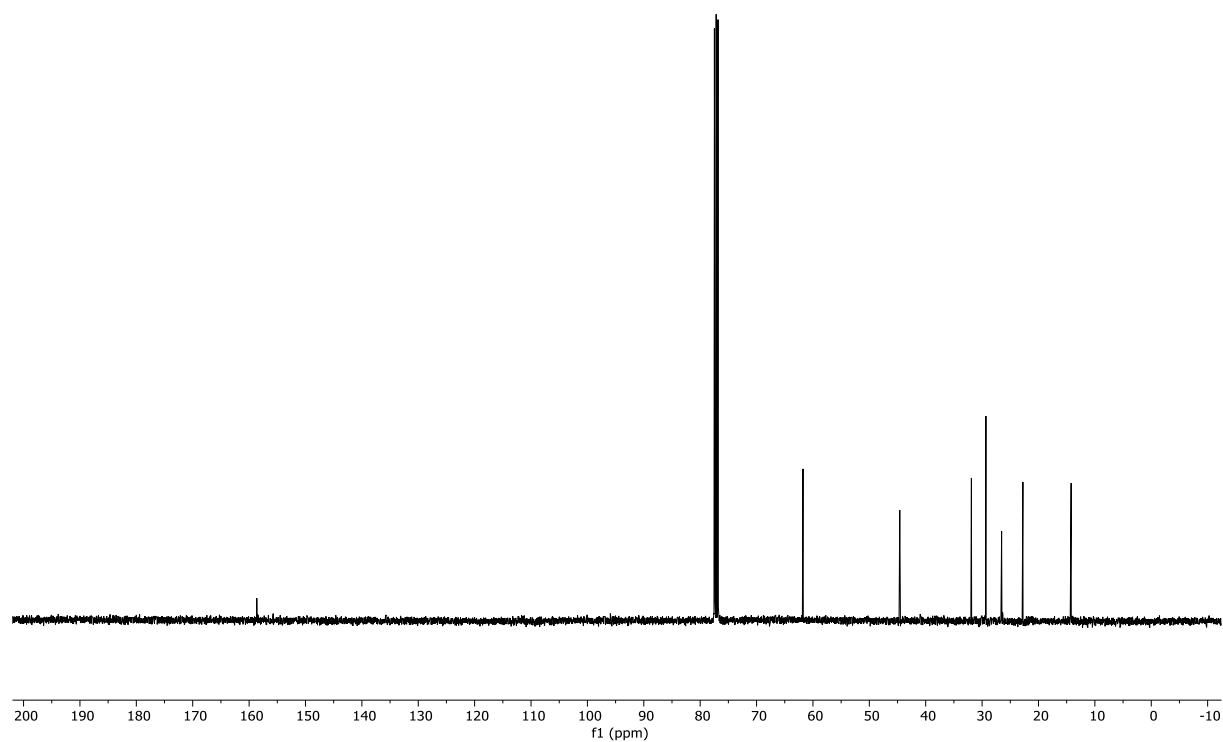

Figure S107. <sup>13</sup>C NMR spectrum of **13a<sub>d2β2</sub>**.

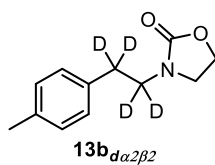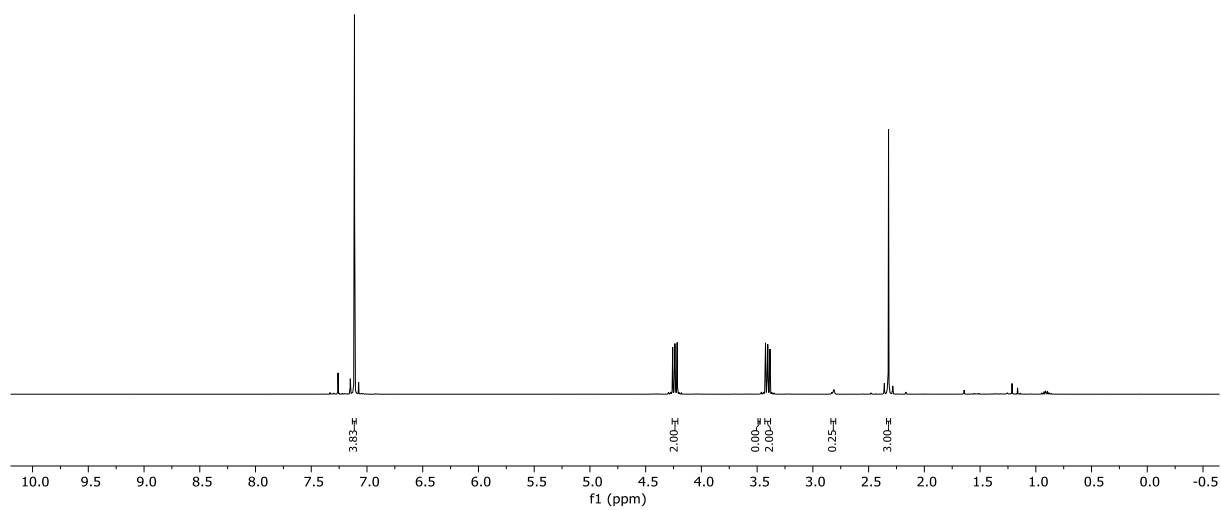

Figure S108. <sup>1</sup>H NMR spectrum of **13b<sub>dα2β2</sub>**.

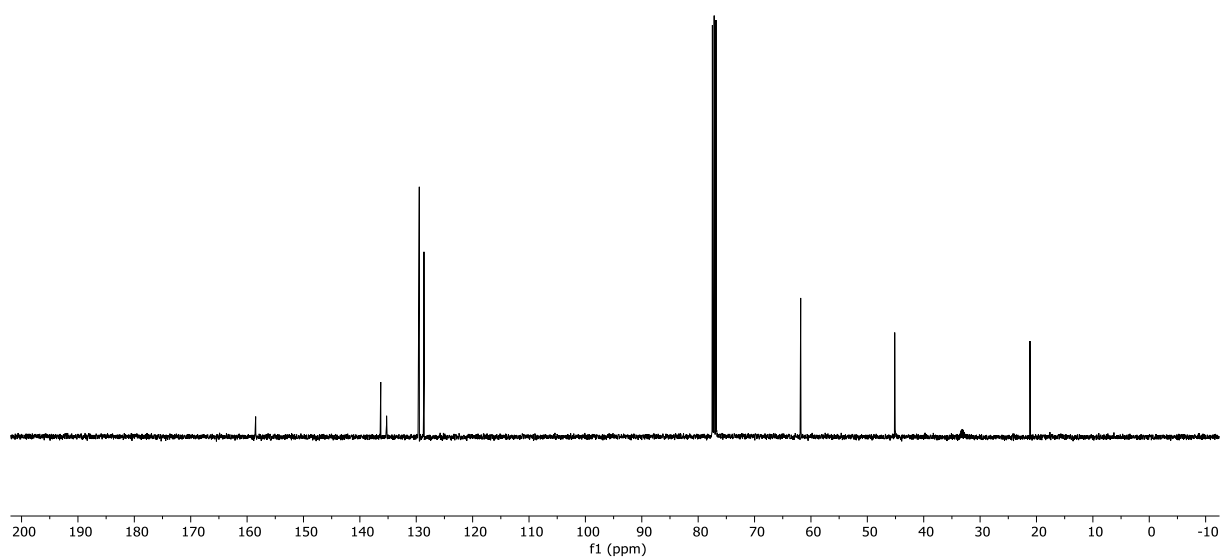

Figure S109. <sup>13</sup>C NMR spectrum of **13b<sub>dα2β2</sub>**.

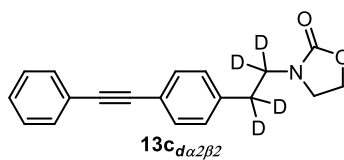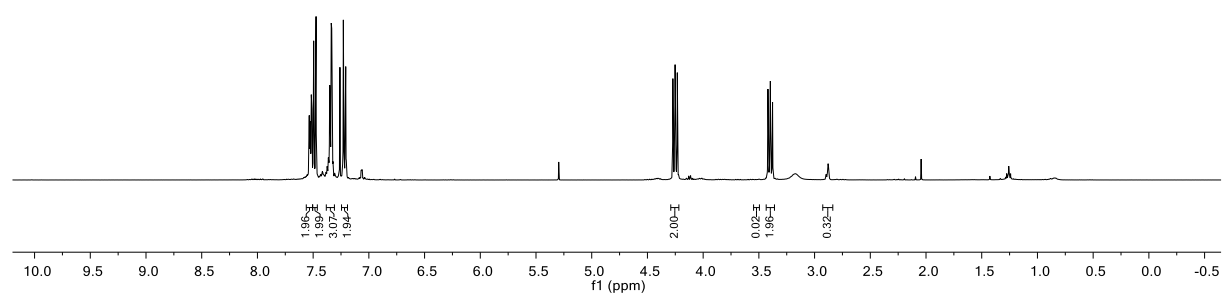

Figure S110.  $^1\text{H}$  NMR spectrum of  $13c_{d_{\alpha}2\beta}2$ .

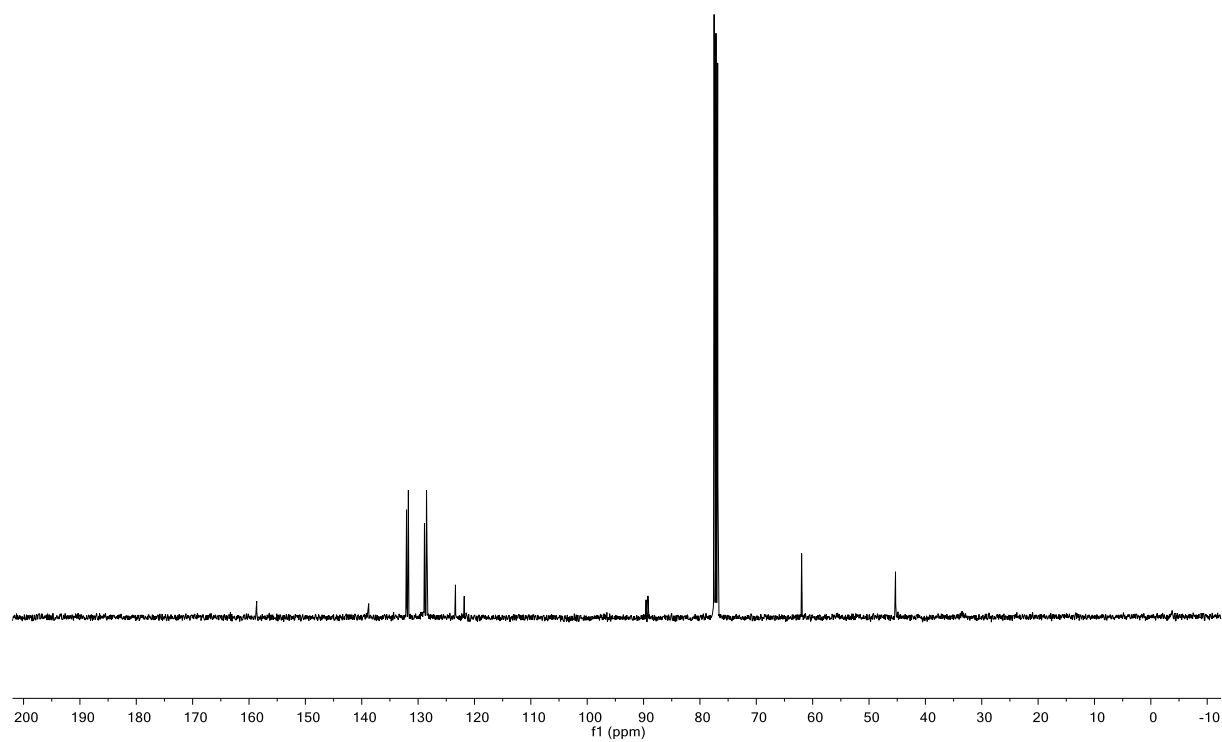

Figure S111.  $^{13}\text{C}$  NMR spectrum of  $13c_{d_{\alpha}2\beta}2$ .

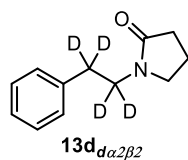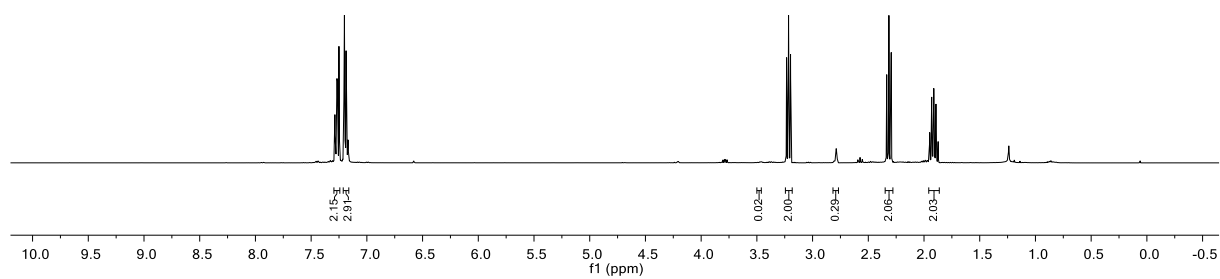

Figure S112. <sup>1</sup>H NMR spectrum of **13d<sub>d $\alpha$ 2 $\beta$ 2</sub>**.

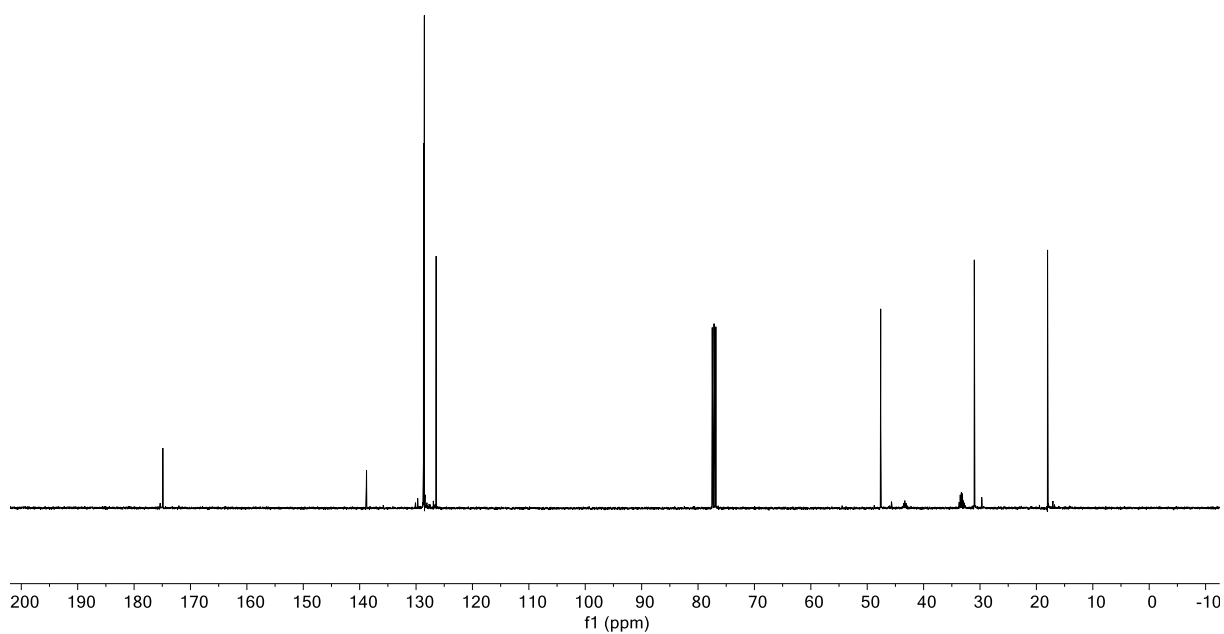

Figure S113. <sup>13</sup>C NMR spectrum of **13d<sub>d $\alpha$ 2 $\beta$ 2</sub>**.

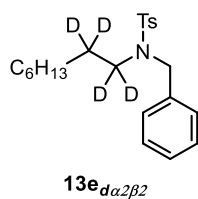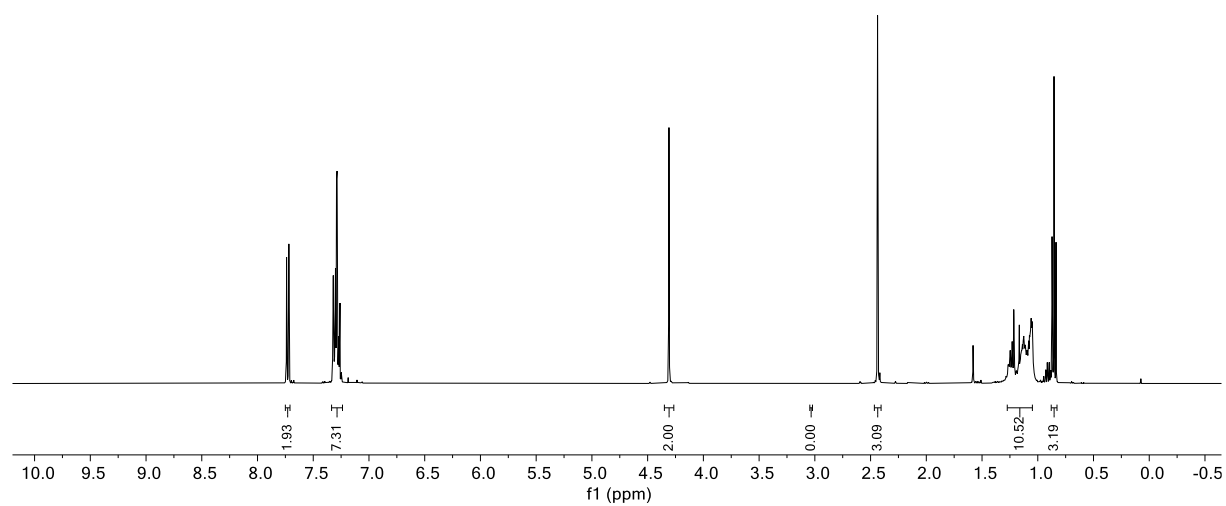

Figure S114. <sup>1</sup>H NMR spectrum of **13e<sub>d $\alpha$ 2 $\beta$ 2</sub>**.

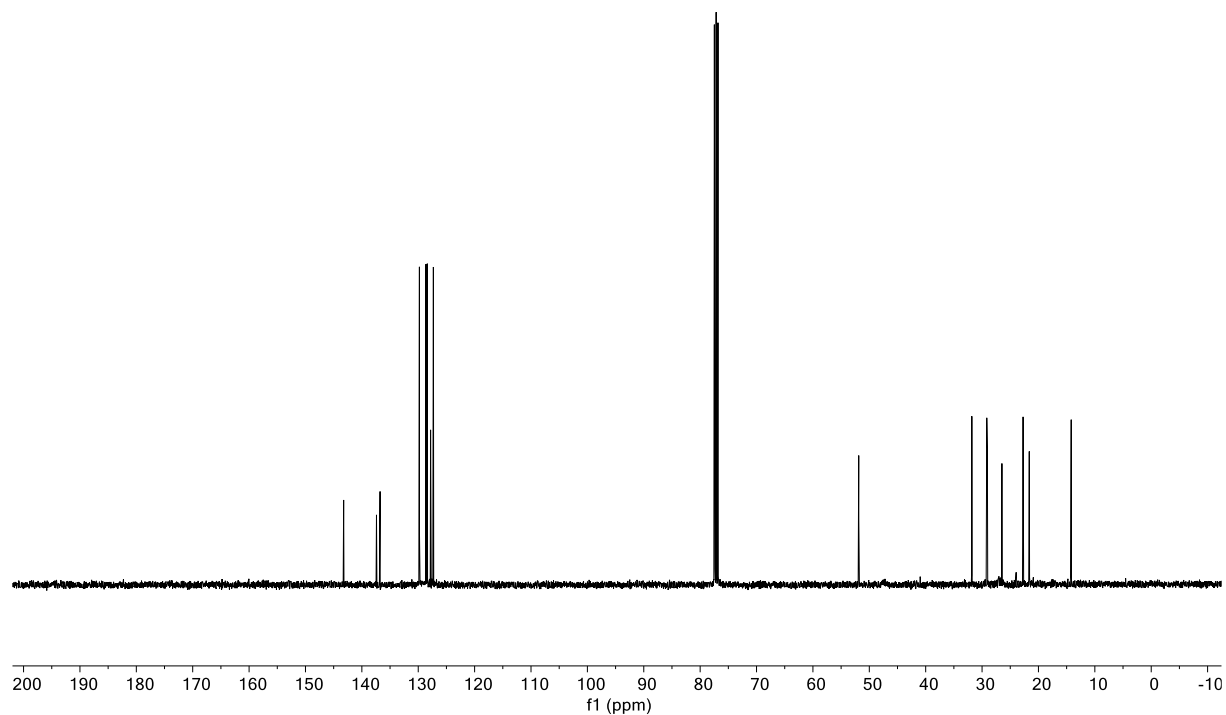

Figure S115. <sup>13</sup>C NMR spectrum of **13e<sub>d $\alpha$ 2 $\beta$ 2</sub>**.

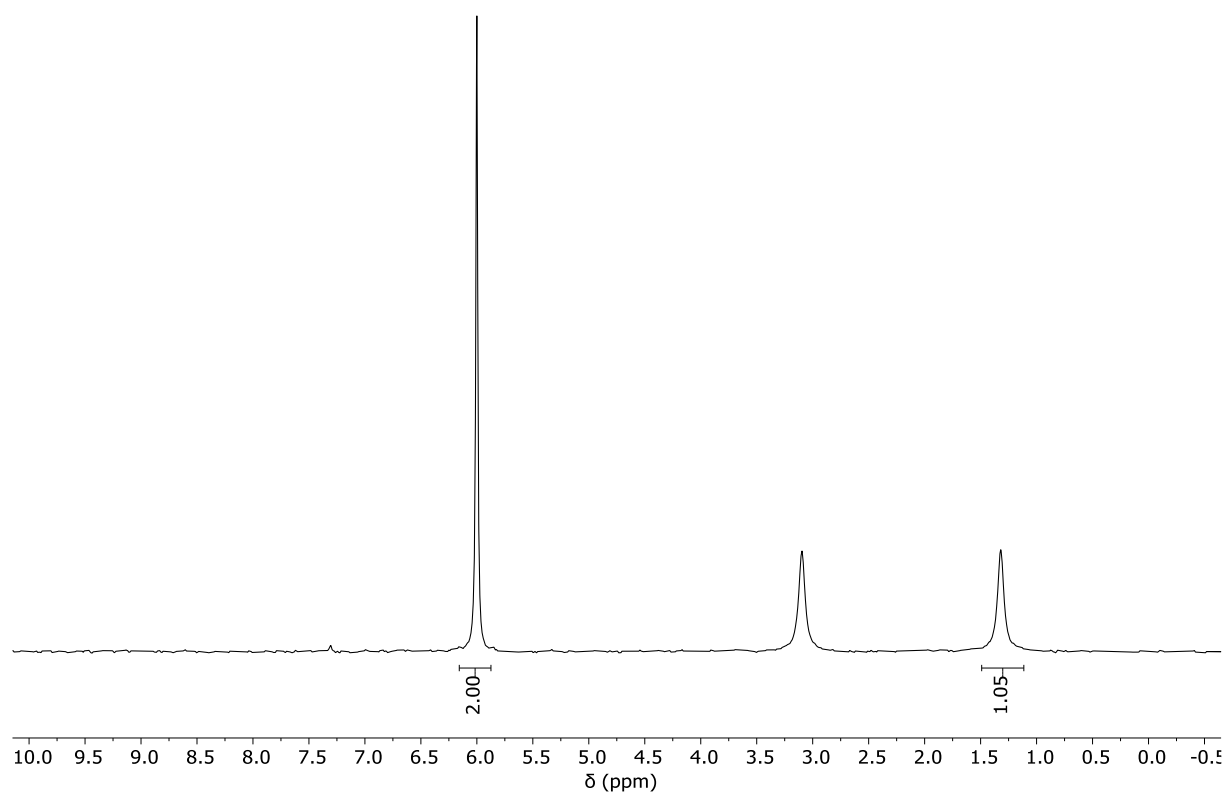

**Figure S116.**  $^2\text{H}$  NMR spectrum of  $13e_{d\alpha 2\beta 2}$ .



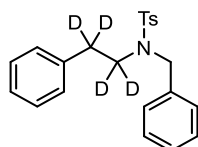

**13f<sub>d $\alpha$ 2 $\beta$ 2</sub>**

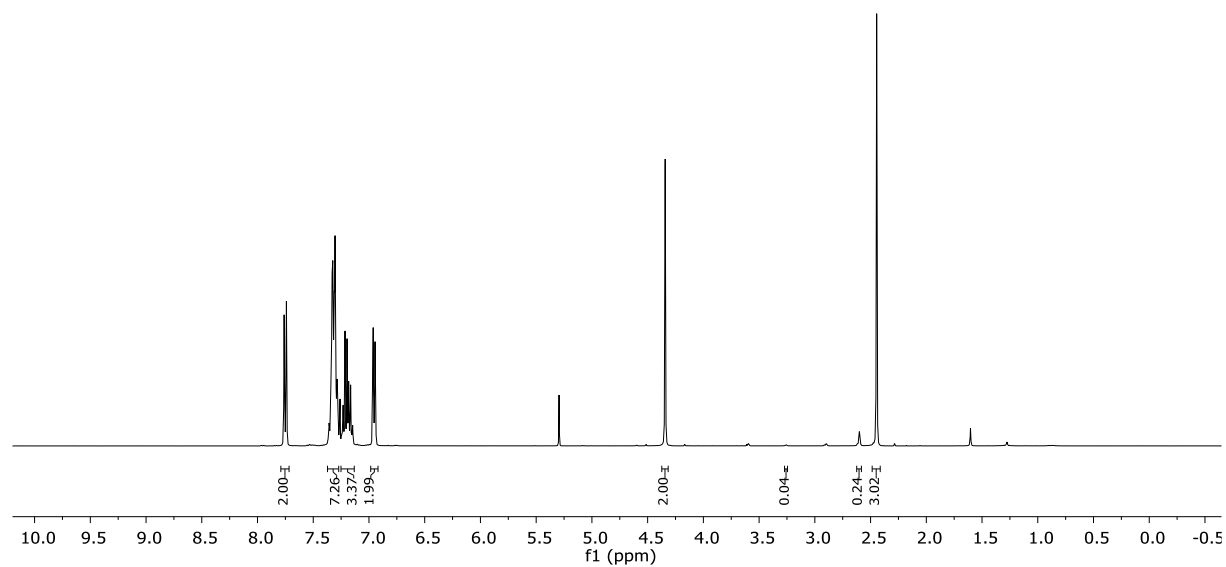

**Figure S117.** <sup>1</sup>H NMR spectrum of **13f<sub>d $\alpha$ 2 $\beta$ 2</sub>**.

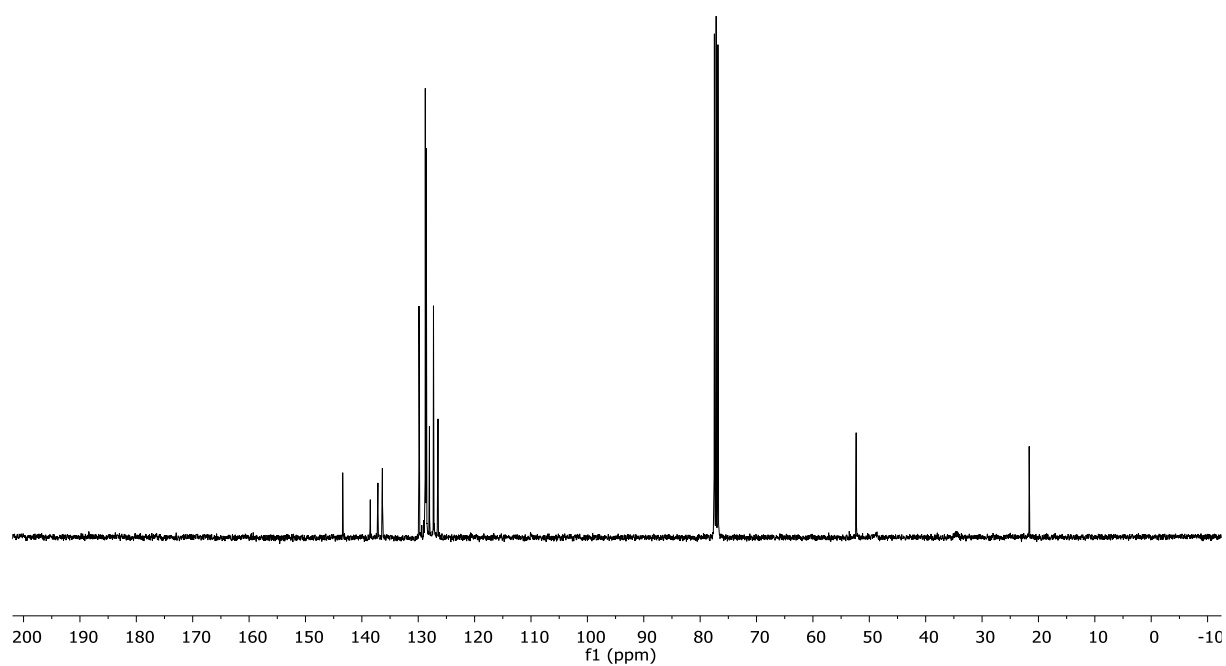

**Figure S118.** <sup>13</sup>C NMR spectrum of **13f<sub>d $\alpha$ 2 $\beta$ 2</sub>**.

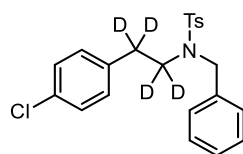

**13g<sub>da2β2</sub>**

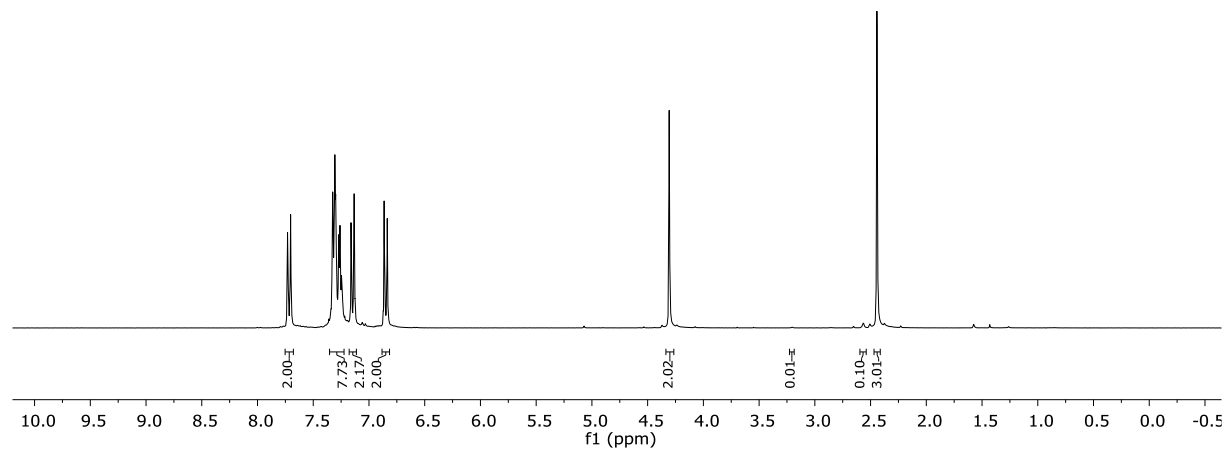

**Figure S119.** <sup>1</sup>H NMR spectrum of **13g<sub>da2β2</sub>**.

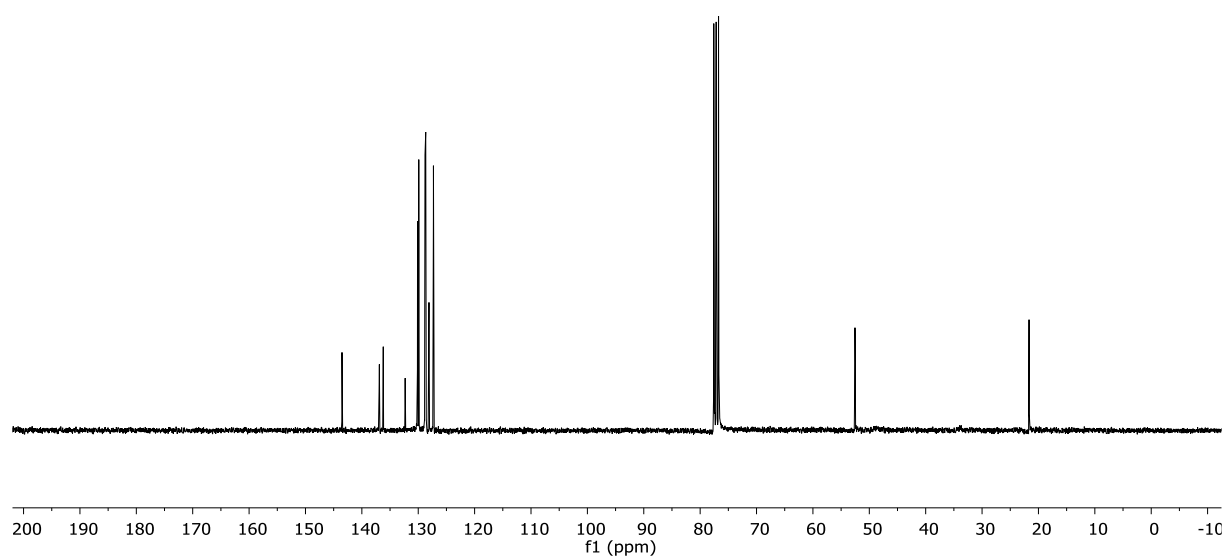

**Figure S120.** <sup>13</sup>C NMR spectrum of **13g<sub>da2β2</sub>**.

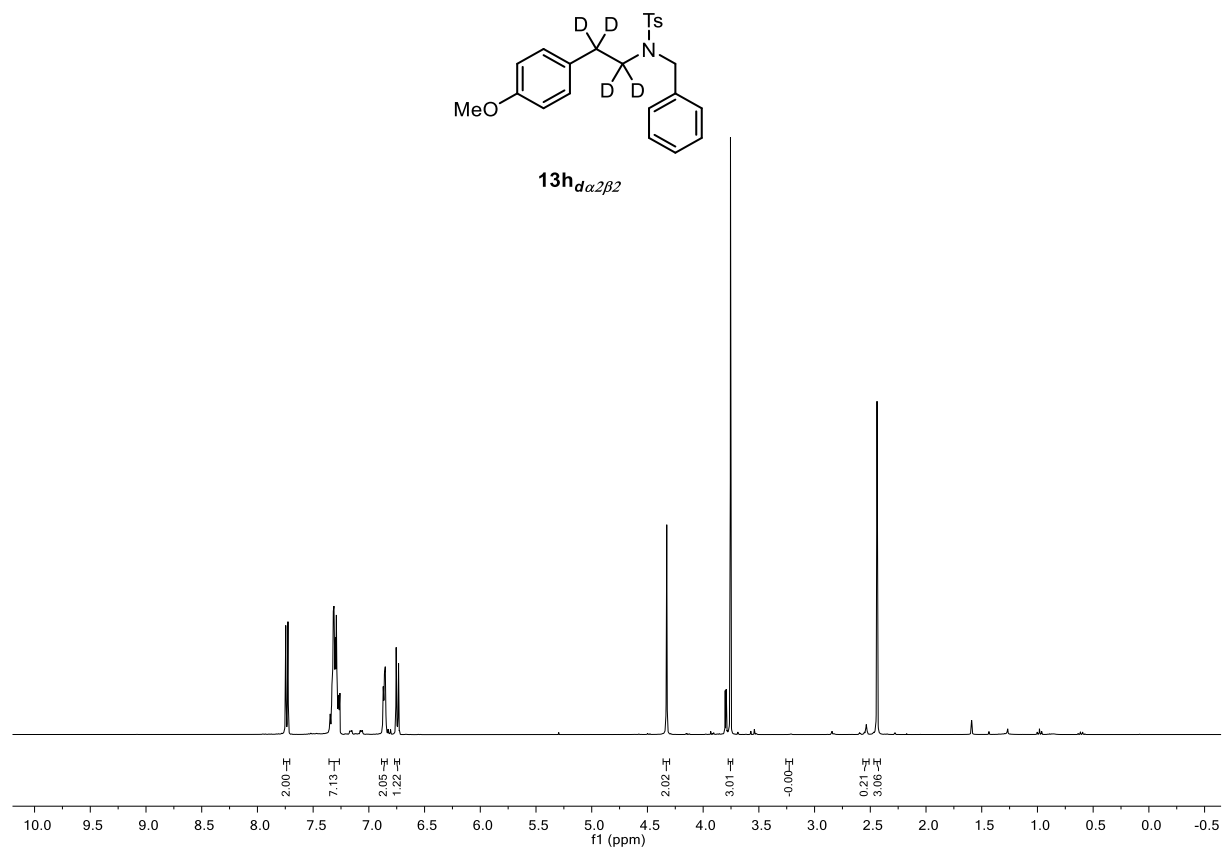

Figure S121.  $^1H$  NMR spectrum of  $13h_{d\alpha 2\beta 2}$ .

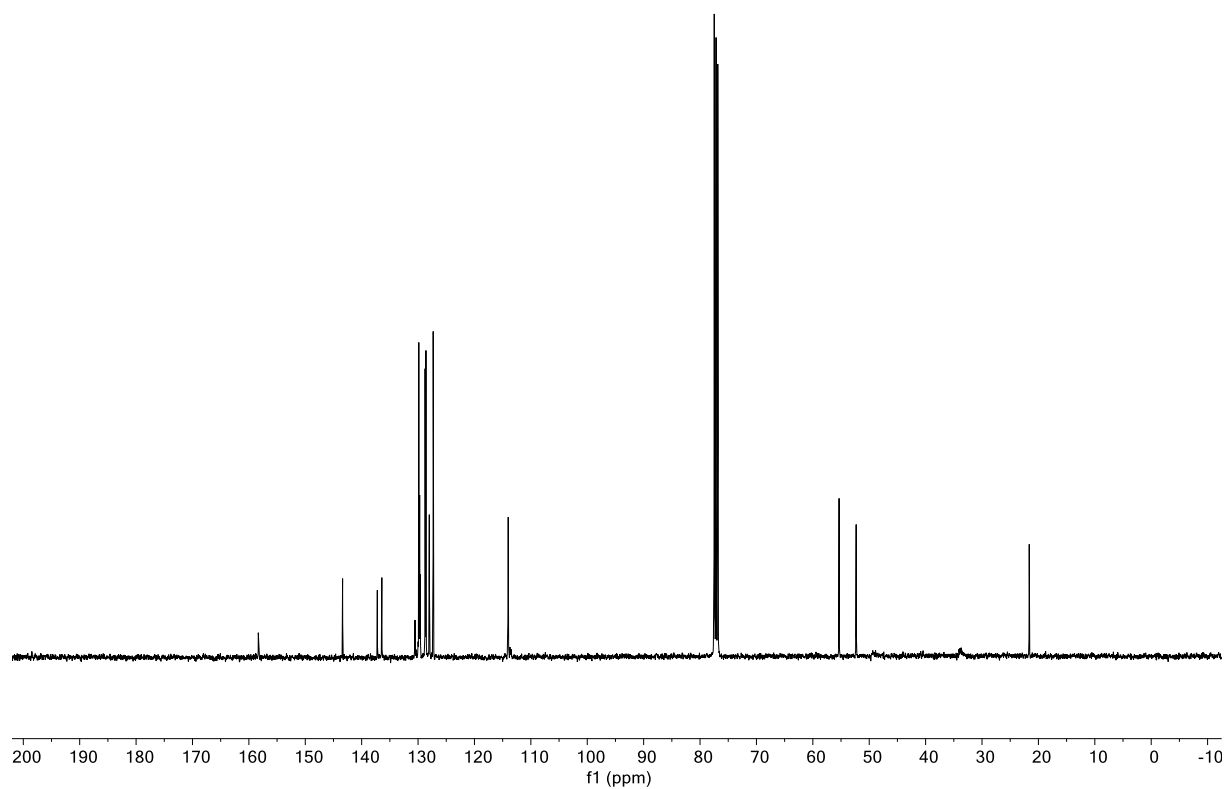

Figure S122.  $^{13}C$  NMR spectrum of  $13h_{d\alpha 2\beta 2}$ .

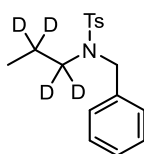

**13i <sub>$\alpha 2 \beta 2$</sub>**

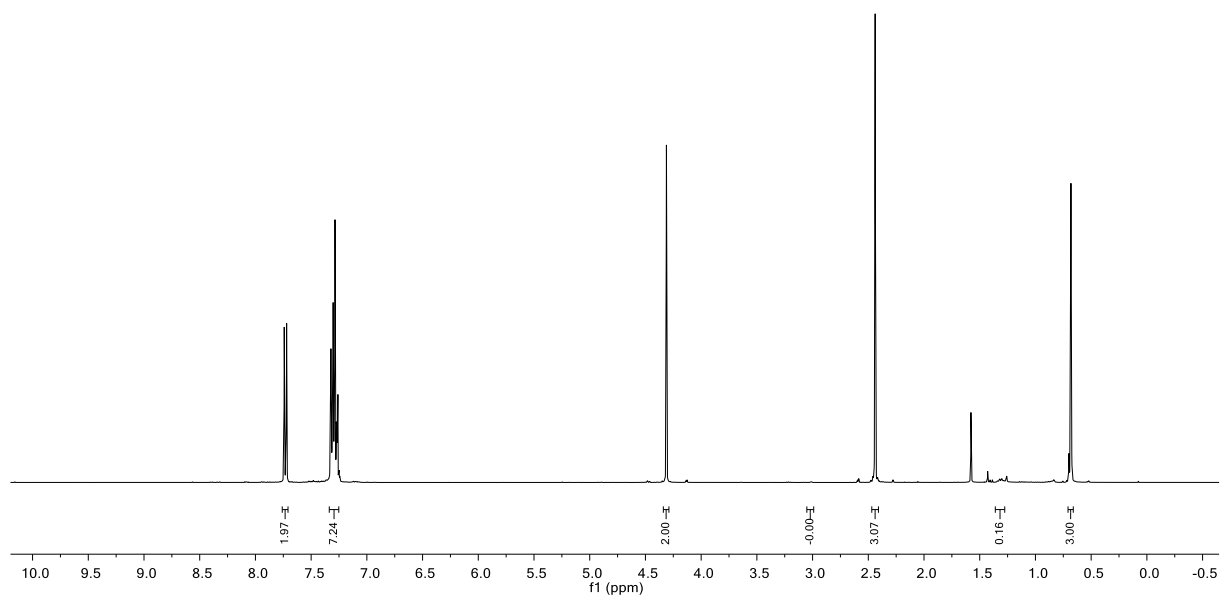

**Figure S123.** <sup>1</sup>H NMR spectrum of **13i <sub>$\alpha 2 \beta 2$</sub>** .

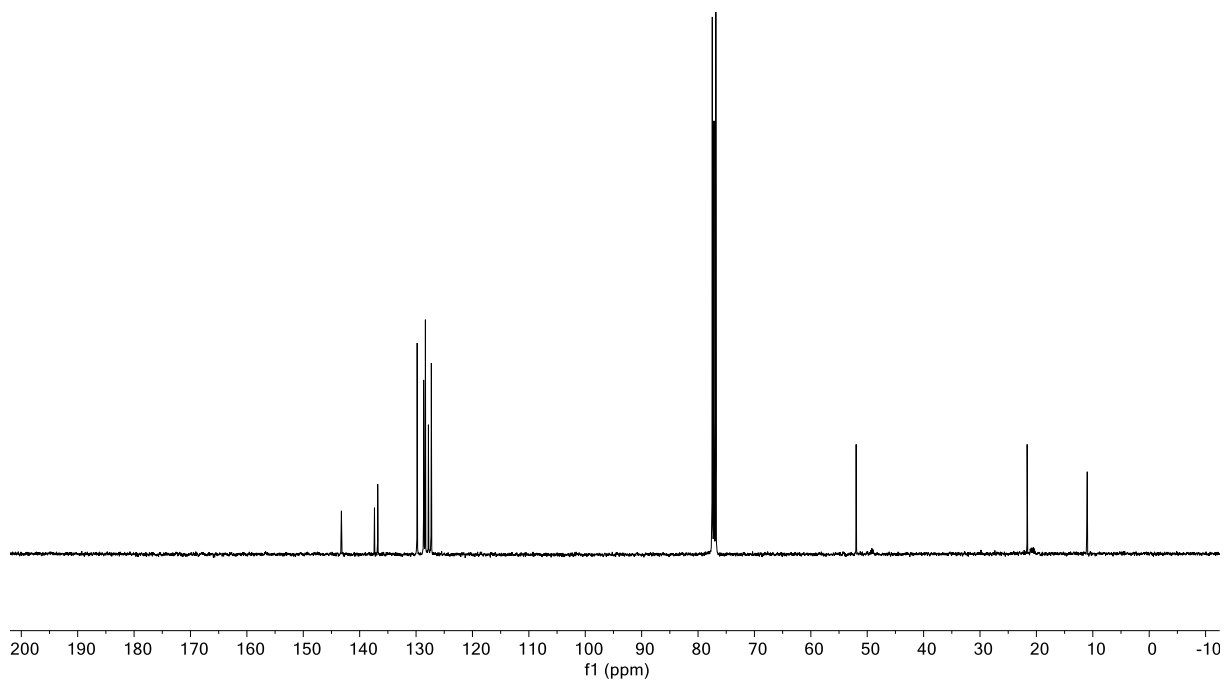

**Figure S124.** <sup>13</sup>C NMR spectrum of **13i <sub>$\alpha 2 \beta 2$</sub>** .

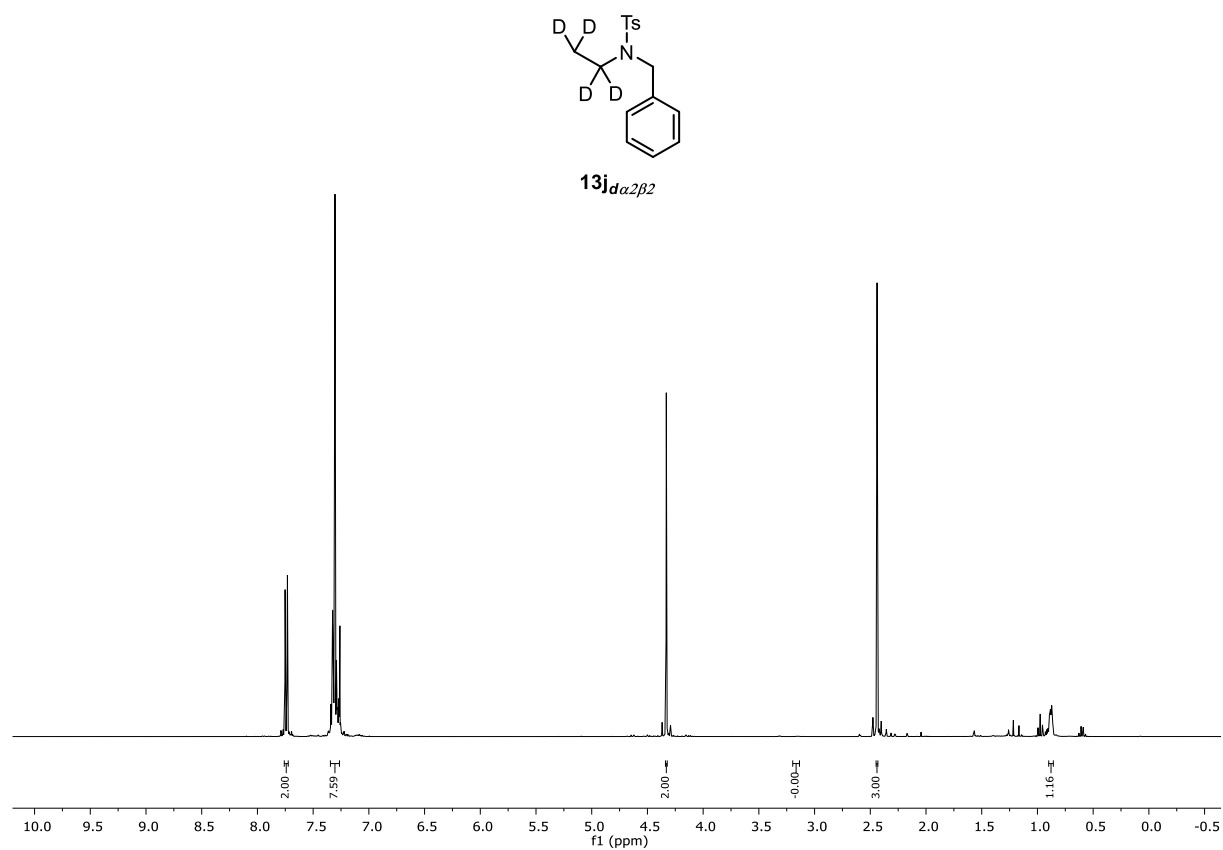

Figure S125. <sup>1</sup>H NMR spectrum of **13j <sub>$\alpha 2 \beta 2$</sub>** .

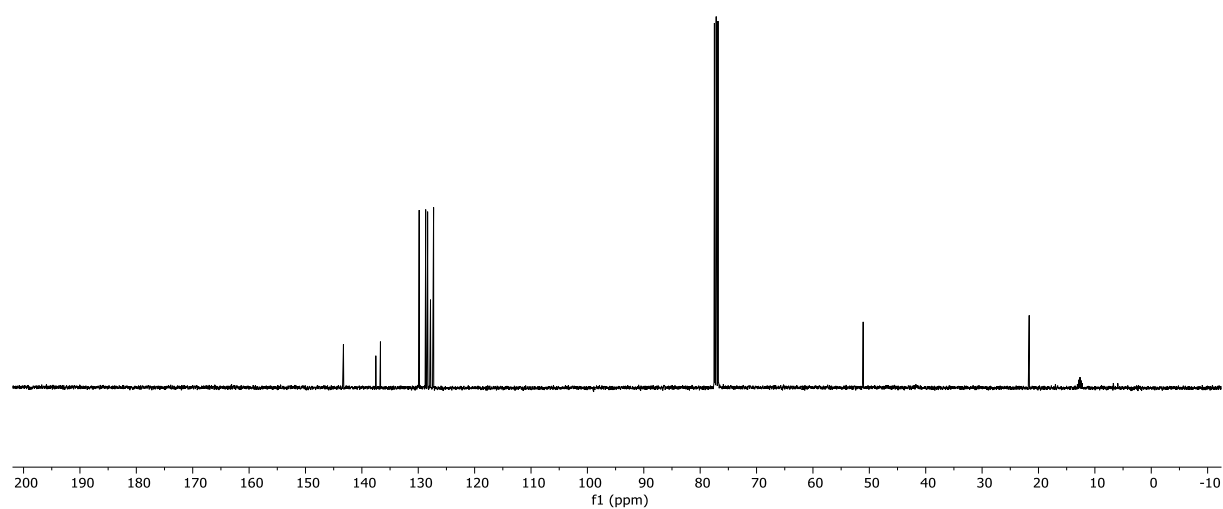

Figure S126. <sup>13</sup>C NMR spectrum of **13j <sub>$\alpha 2 \beta 2$</sub>** .

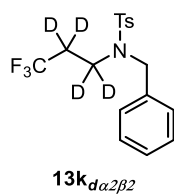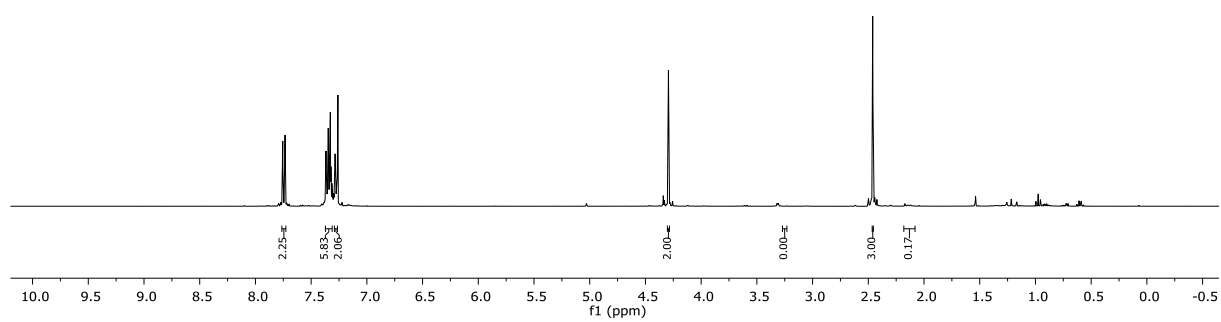

Figure S127. <sup>1</sup>H NMR spectrum of **13k<sub>d $\alpha$ 2 $\beta$ 2</sub>**.

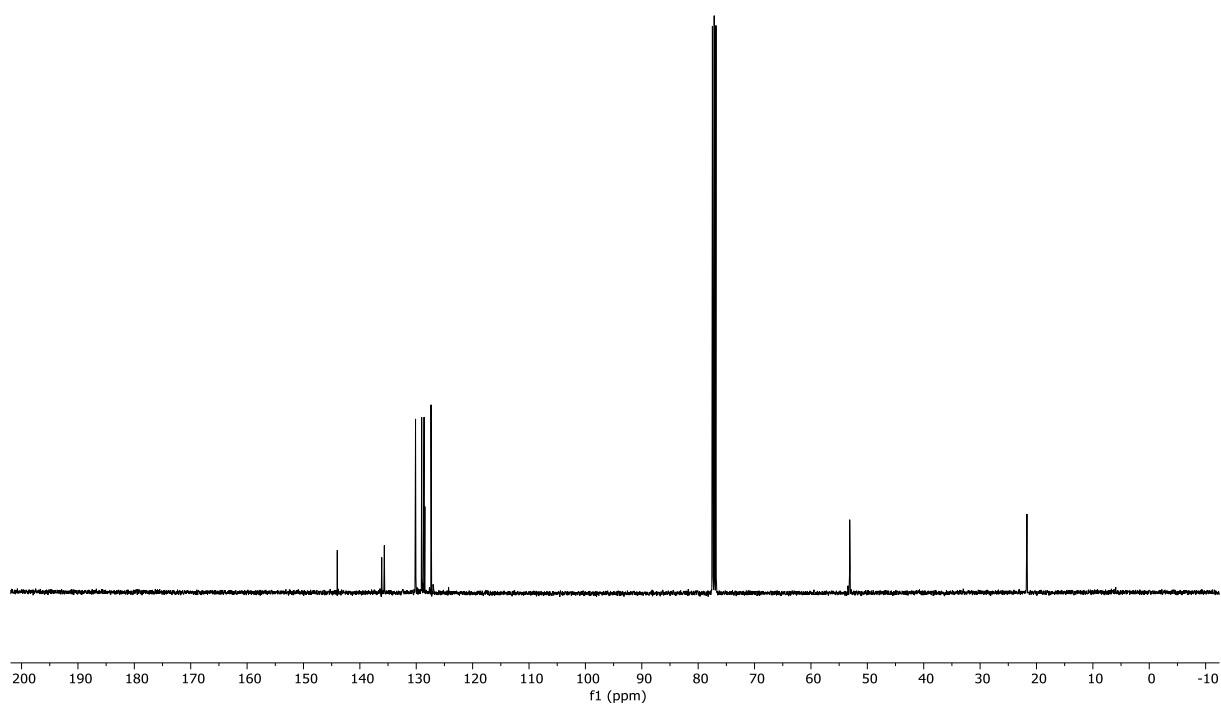

Figure S128. <sup>13</sup>C NMR spectrum of **13k<sub>d $\alpha$ 2 $\beta$ 2</sub>**.

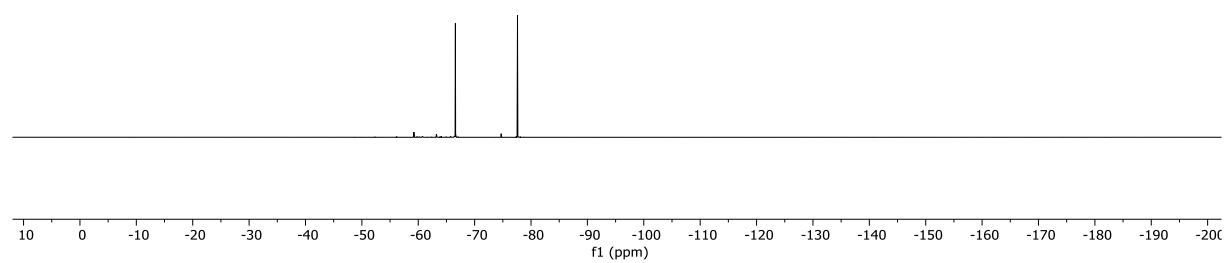

**Figure S129.**  $^{19}\text{F}$  NMR spectrum of **13k<sub>da2β2</sub>**.

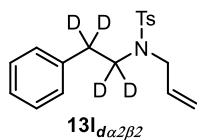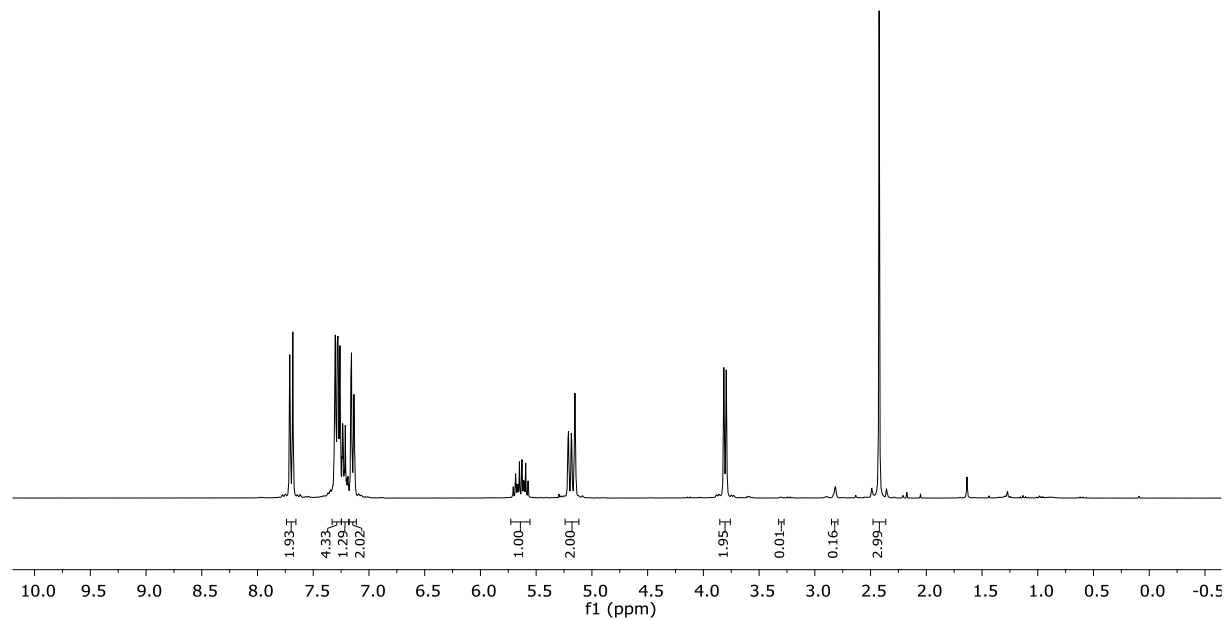

Figure S130. <sup>1</sup>H NMR spectrum of **13I<sub>dα2β2</sub>**.

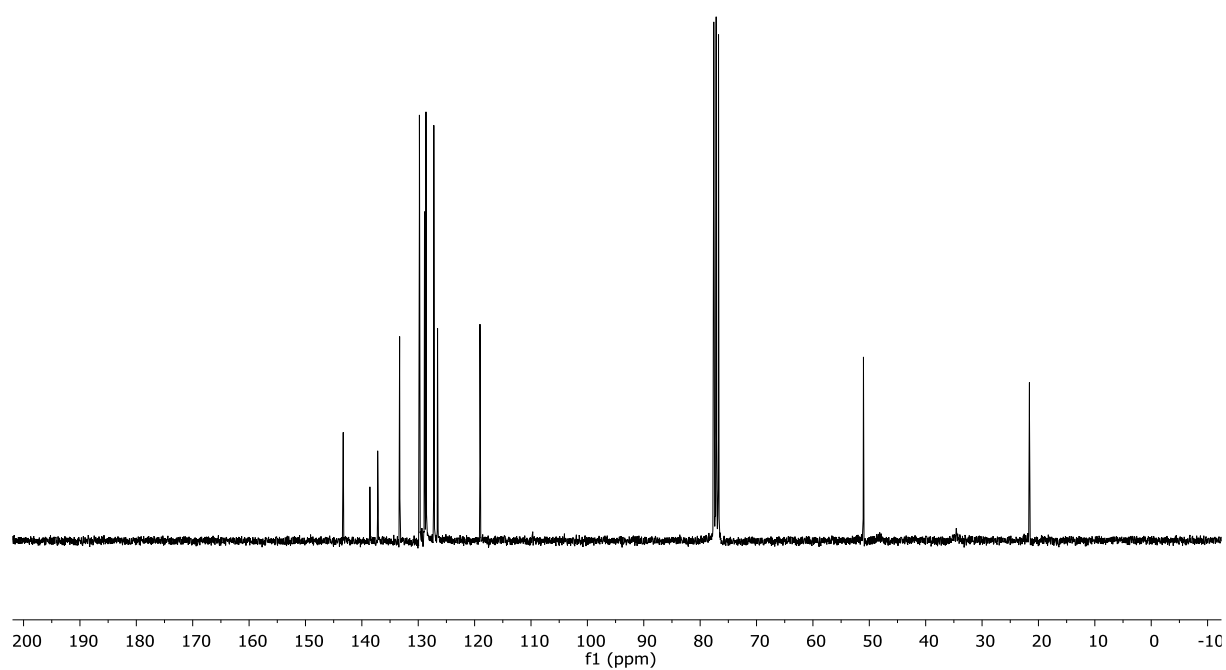

Figure S131. <sup>13</sup>C NMR spectrum of **13I<sub>dα2β2</sub>**.



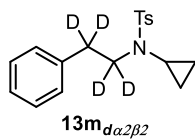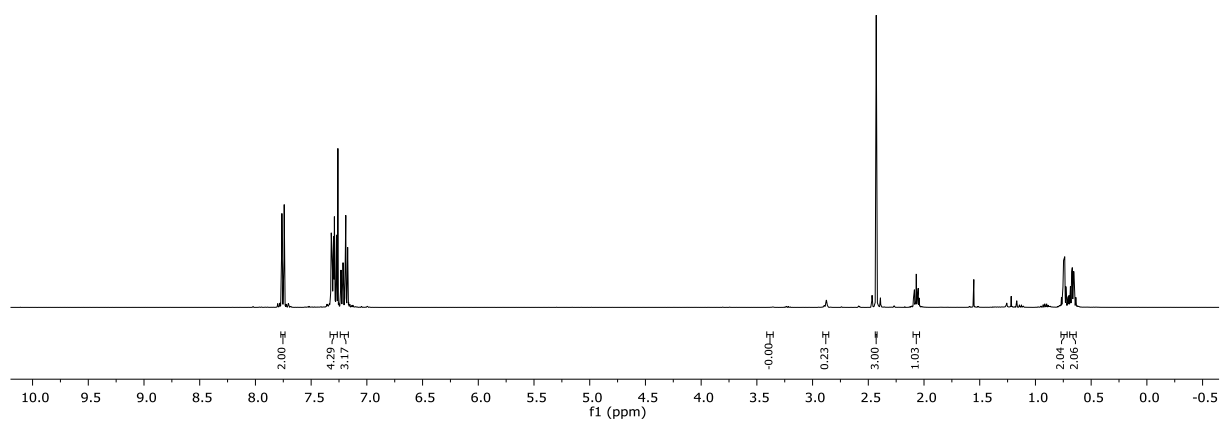

Figure S132. <sup>1</sup>H NMR spectrum of **13m<sub>d $\alpha$ 2 $\beta$ 2</sub>**.

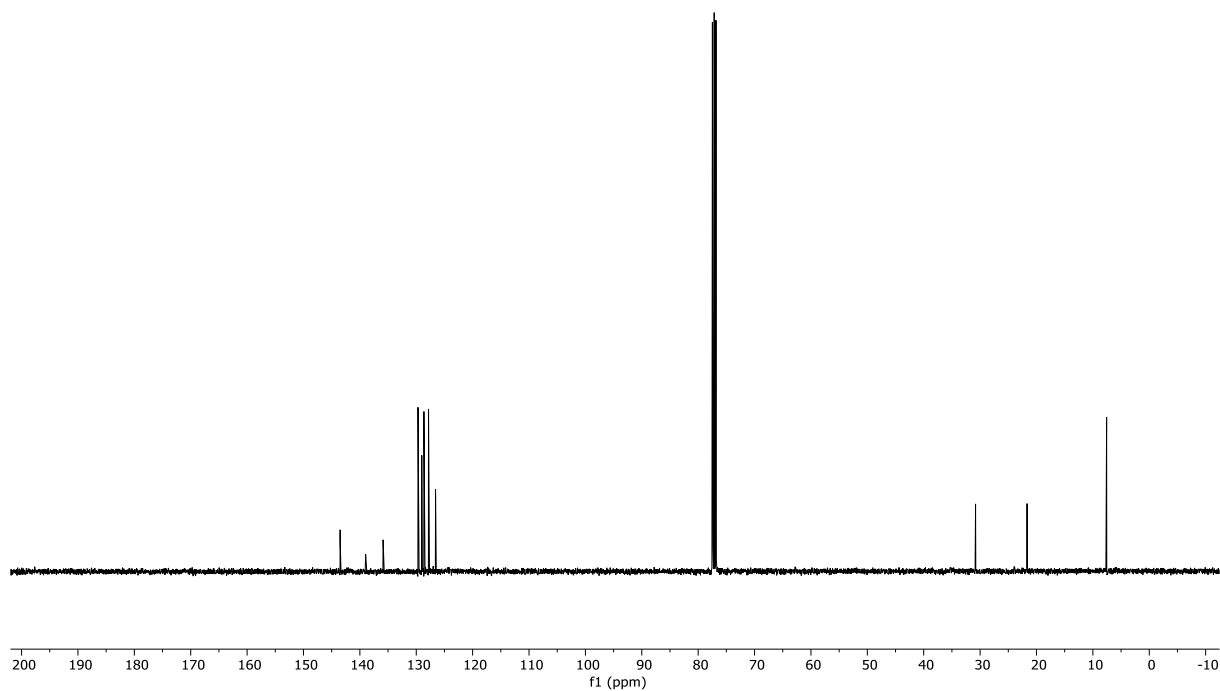

Figure S133. <sup>13</sup>C NMR spectrum of **13m<sub>d $\alpha$ 2 $\beta$ 2</sub>**.

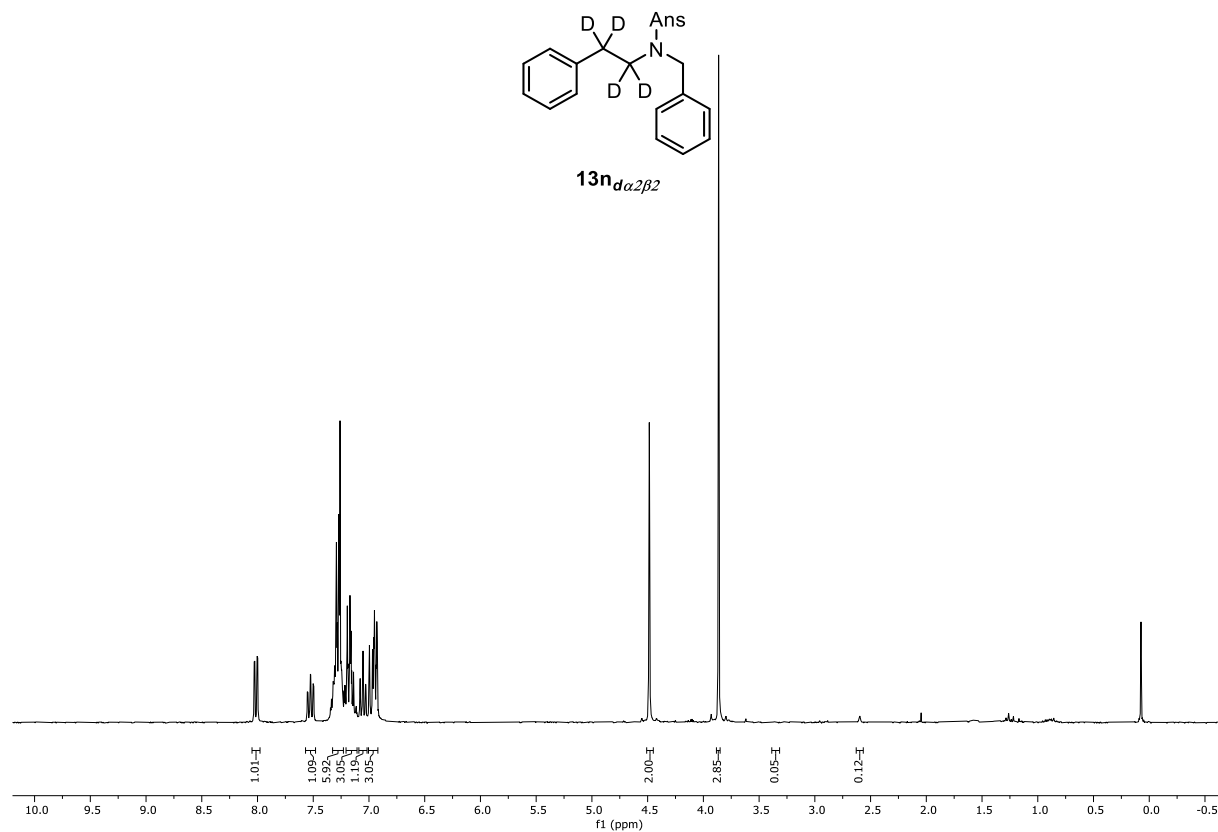

Figure S134. <sup>1</sup>H NMR spectrum of **13n<sub>da2β2</sub>**.

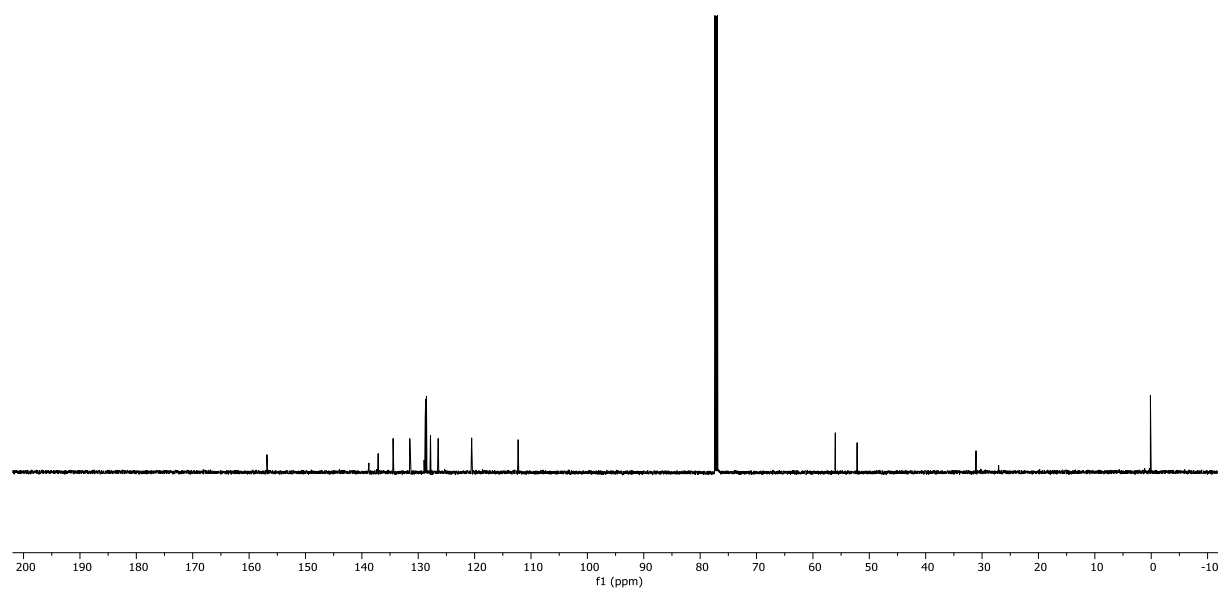

Figure S135. <sup>13</sup>C NMR spectrum of **13n<sub>da2β2</sub>**.

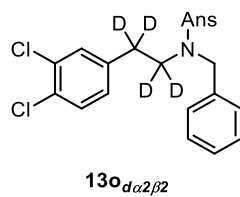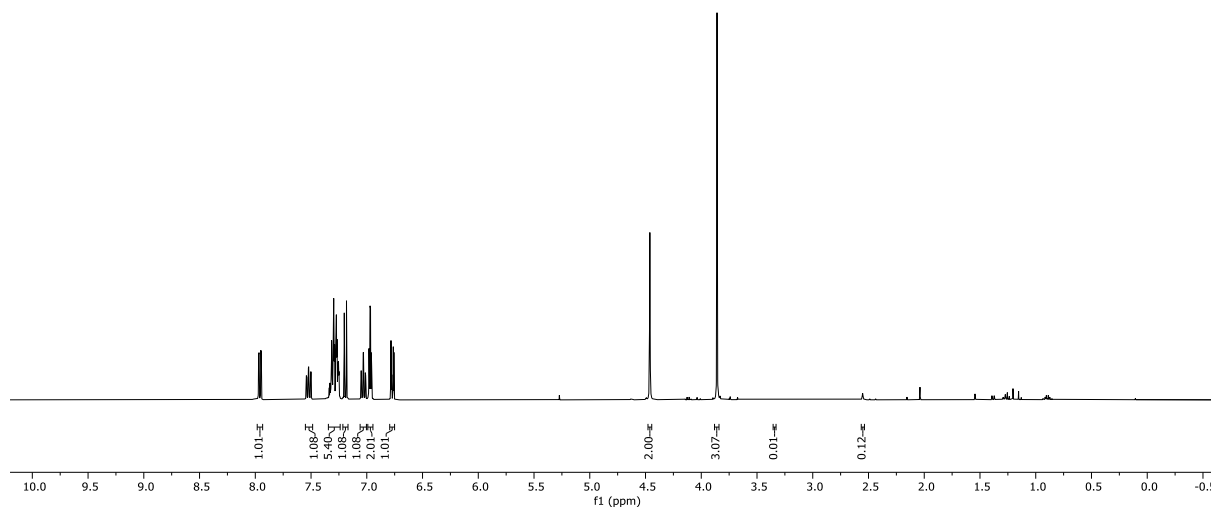

Figure S136. <sup>1</sup>H NMR spectrum of **13o<sub>d $\alpha$ 2 $\beta$ 2</sub>**.

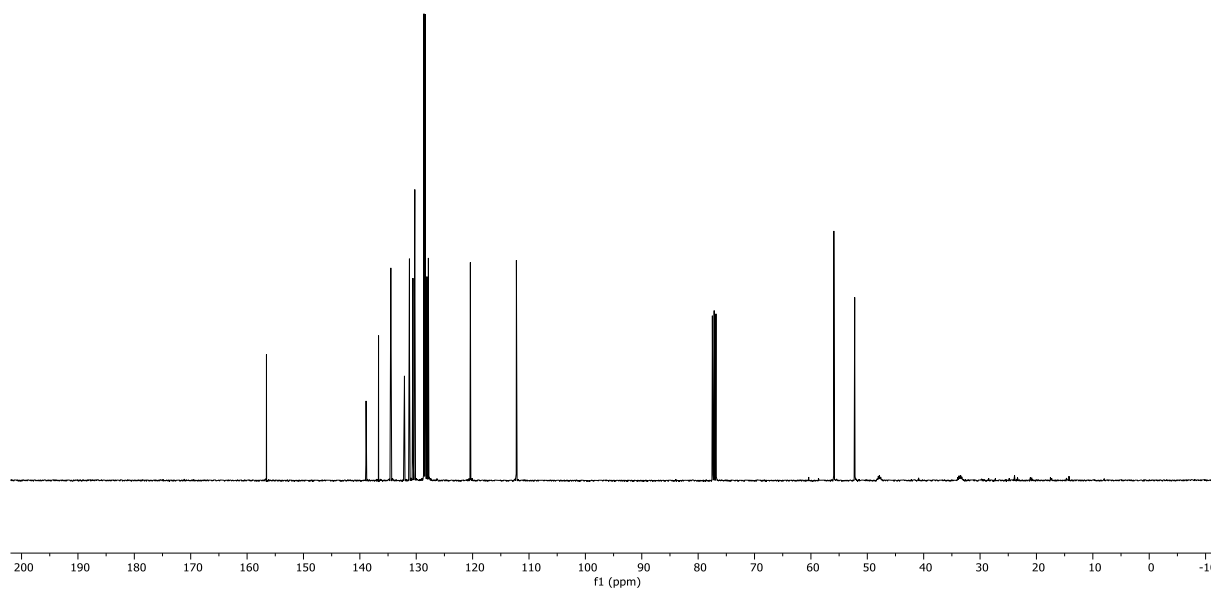

Figure S137. <sup>13</sup>C NMR spectrum of **13o<sub>d $\alpha$ 2 $\beta$ 2</sub>**.

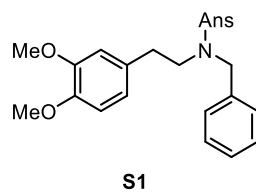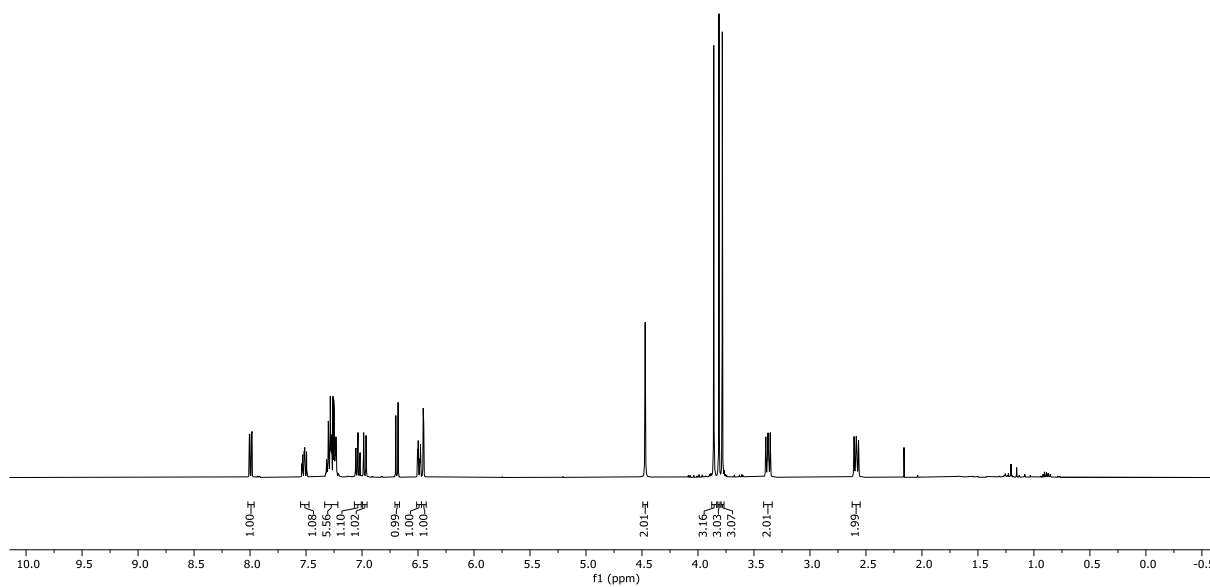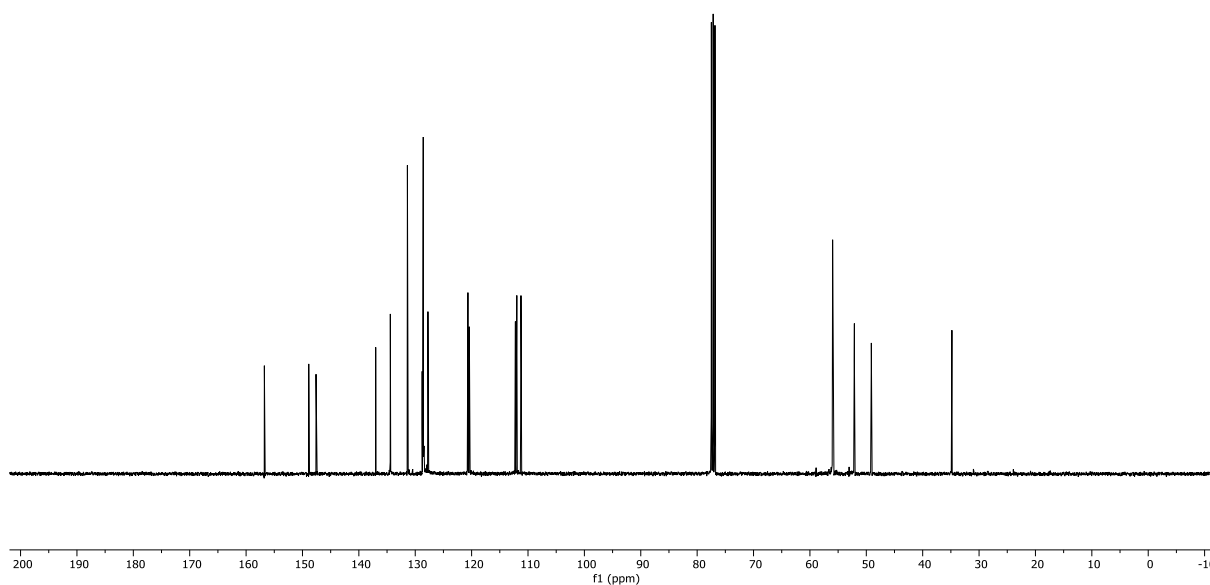

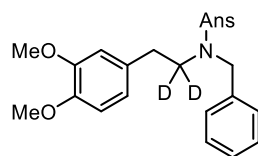

**S1<sub>da2</sub>**

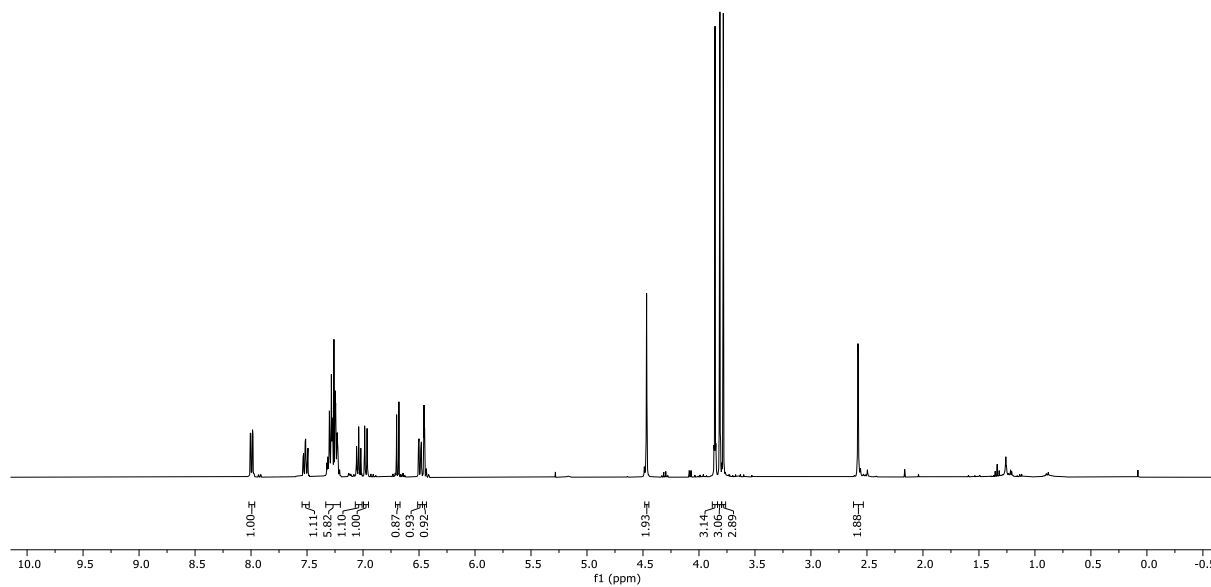

**Figure S140.** <sup>1</sup>H NMR spectrum of **S1<sub>da2</sub>**.

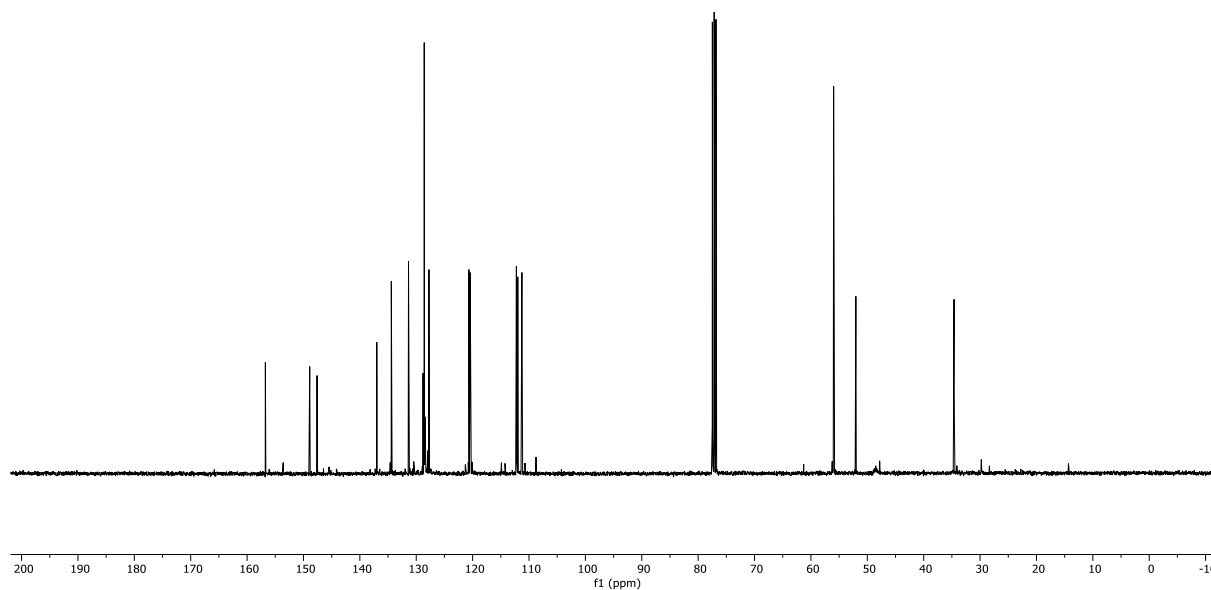

**Figure S141.** <sup>13</sup>C NMR spectrum of **S1<sub>da2</sub>**.

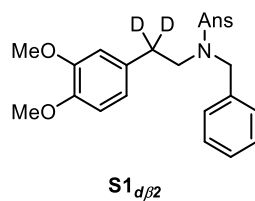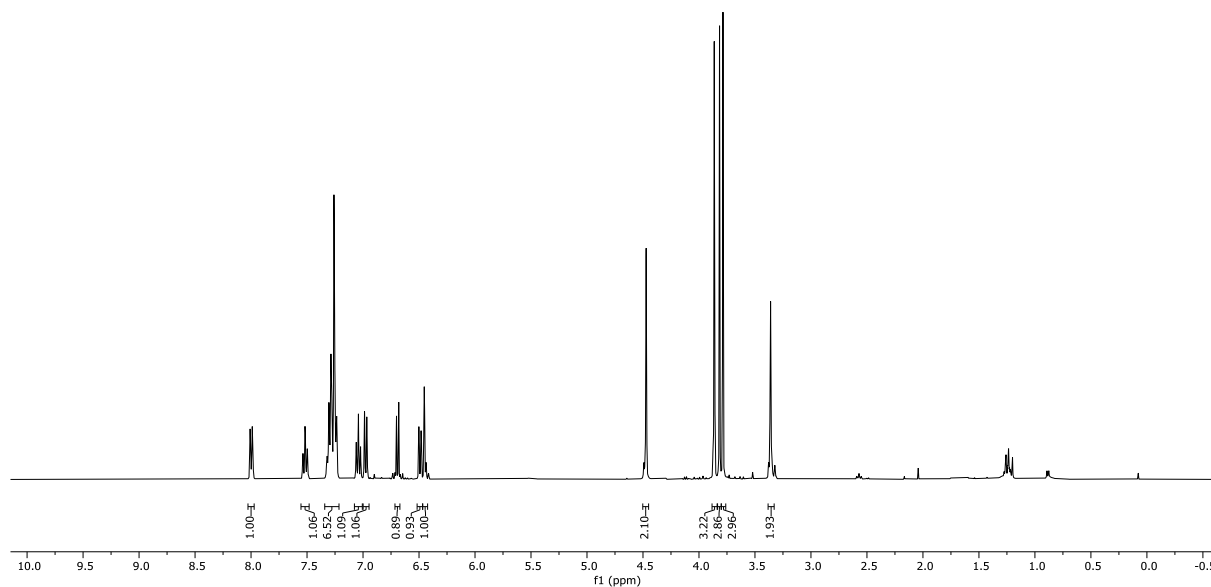

Figure S142. <sup>1</sup>H NMR spectrum of **S1<sub>dβ2</sub>**.

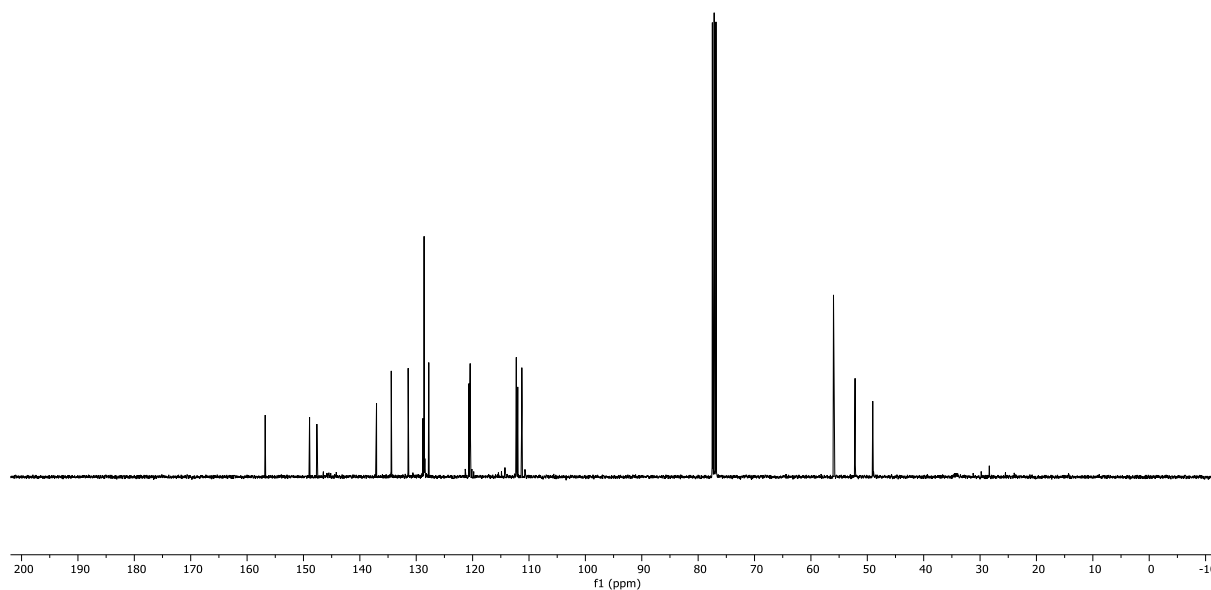

Figure S143. <sup>13</sup>C NMR spectrum of **S1<sub>dβ2</sub>**.

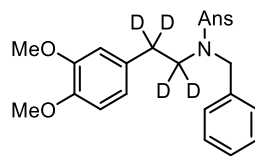

$S1_{d\alpha2\beta2}$

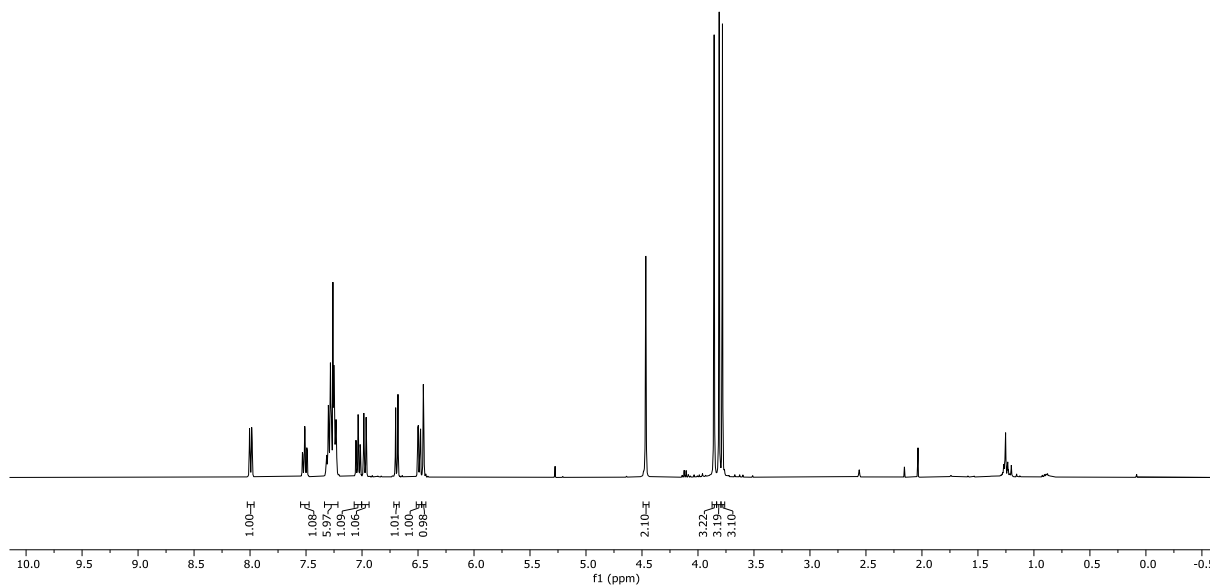

Figure S144.  $^1\text{H}$  NMR spectrum of  $S1_{d\alpha2\beta2}$ .

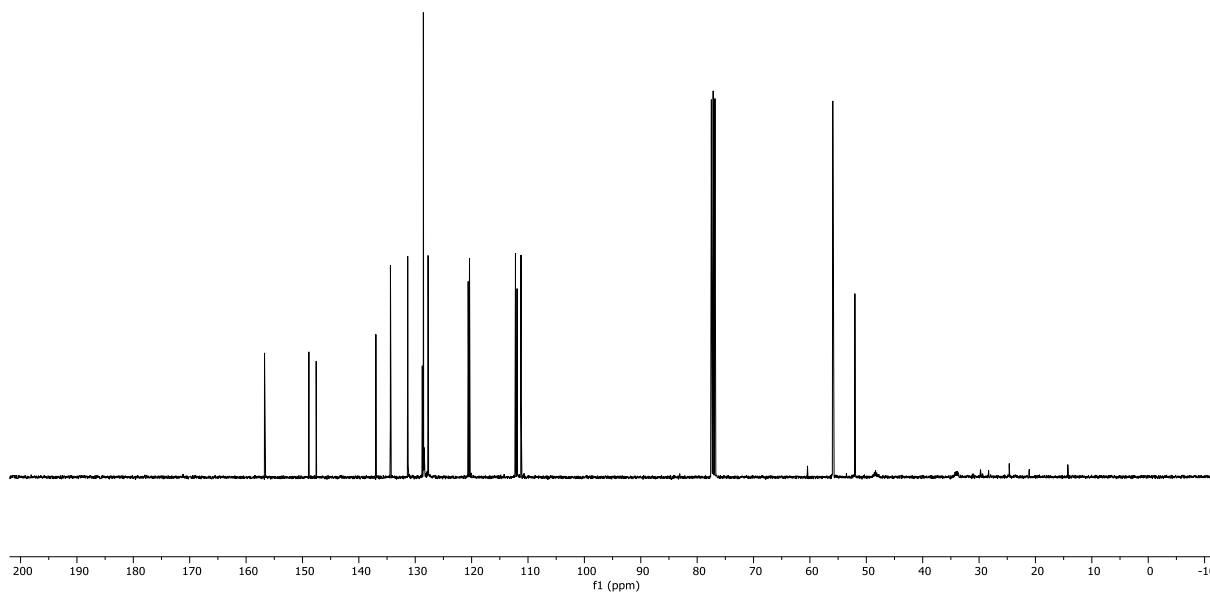

Figure S145.  $^{13}\text{C}$  NMR spectrum of  $S1_{d\alpha2\beta2}$ .

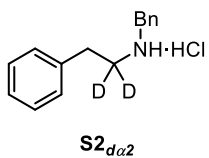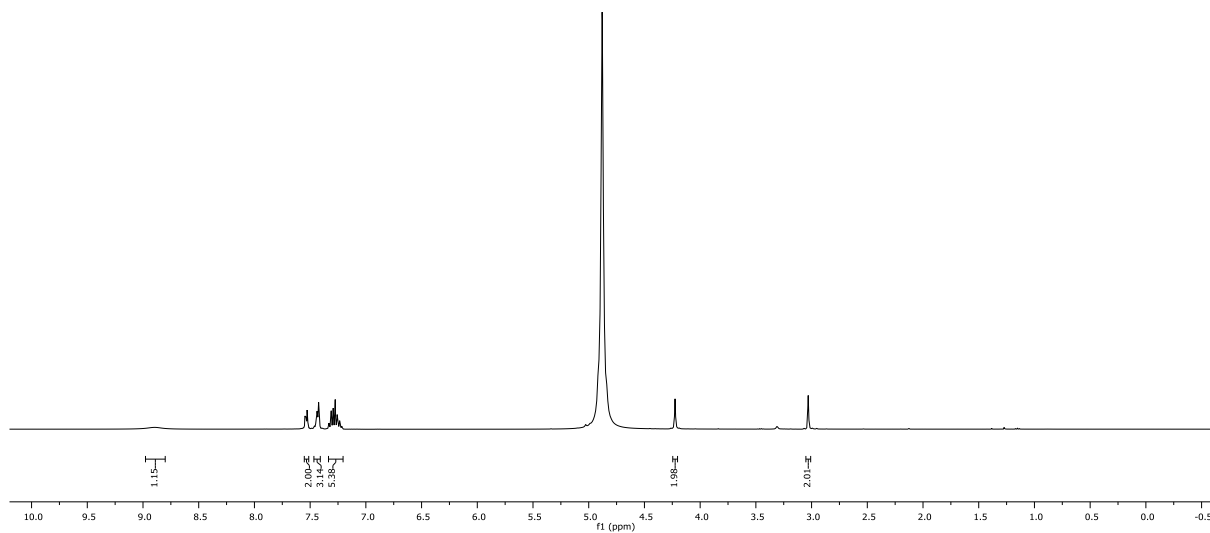

Figure S146. <sup>1</sup>H NMR spectrum of **S2<sub>dα2</sub>**.

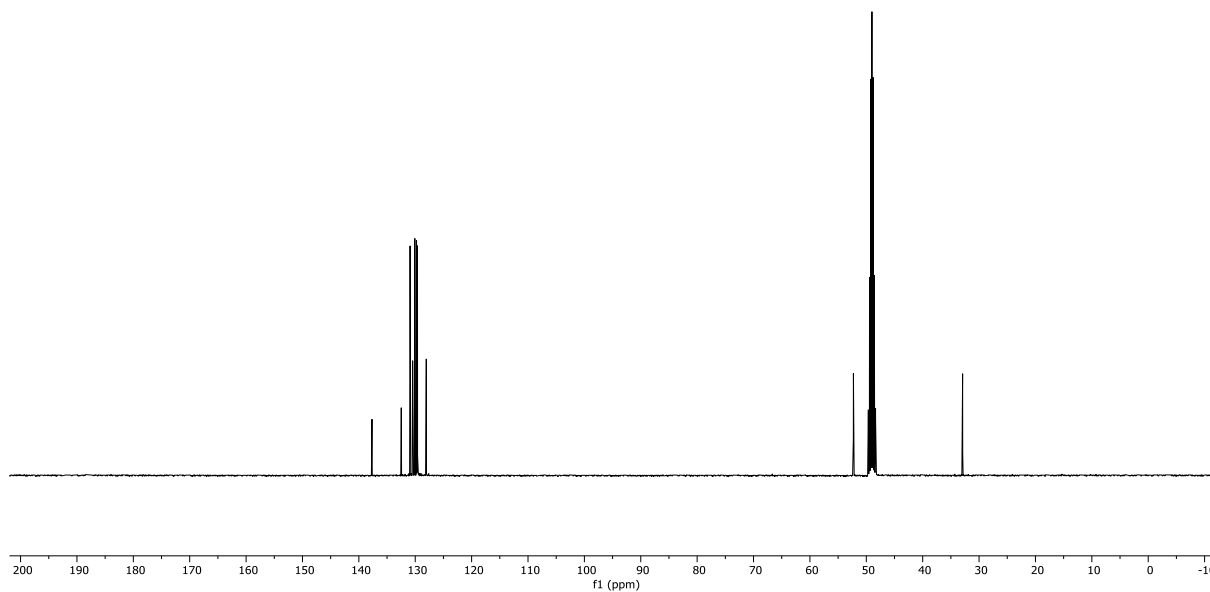

Figure S147. <sup>13</sup>C NMR spectrum of **S2<sub>dα2</sub>**.



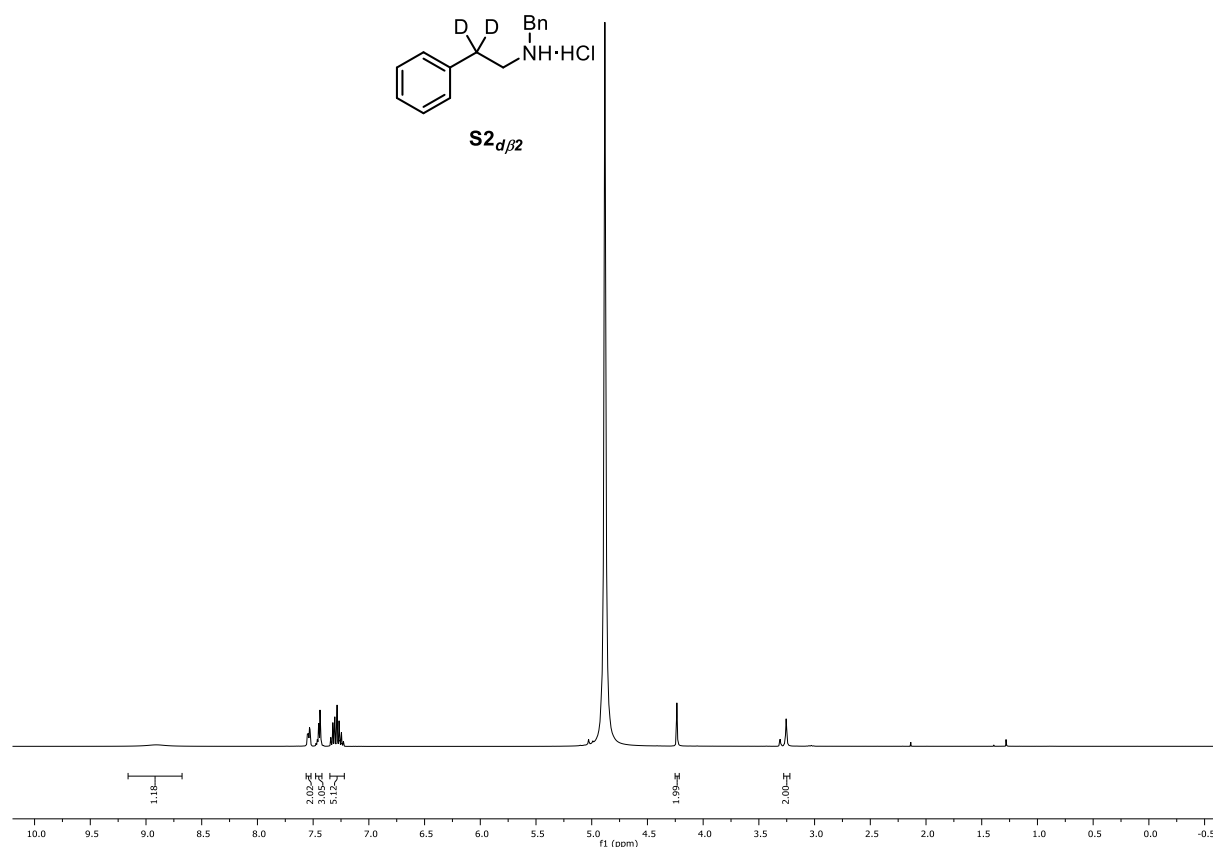

Figure S148.  $^1\text{H}$  NMR spectrum of  $S2_{d\beta 2}$ .

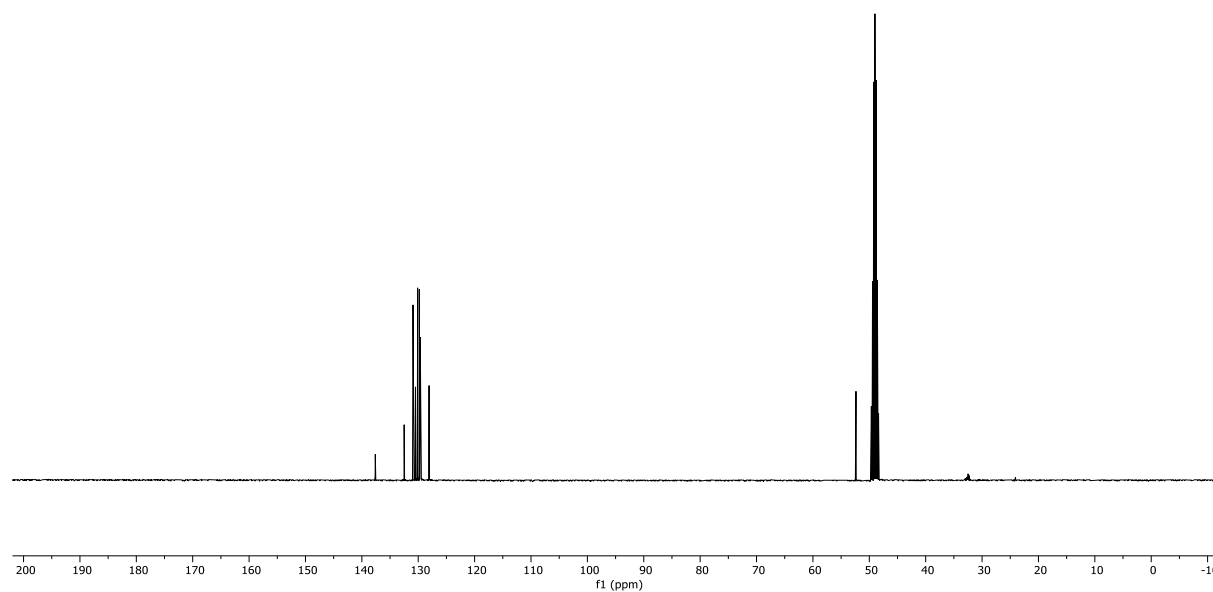

Figure S149.  $^{13}\text{C}$  NMR spectrum of  $S2_{d\beta 2}$ .

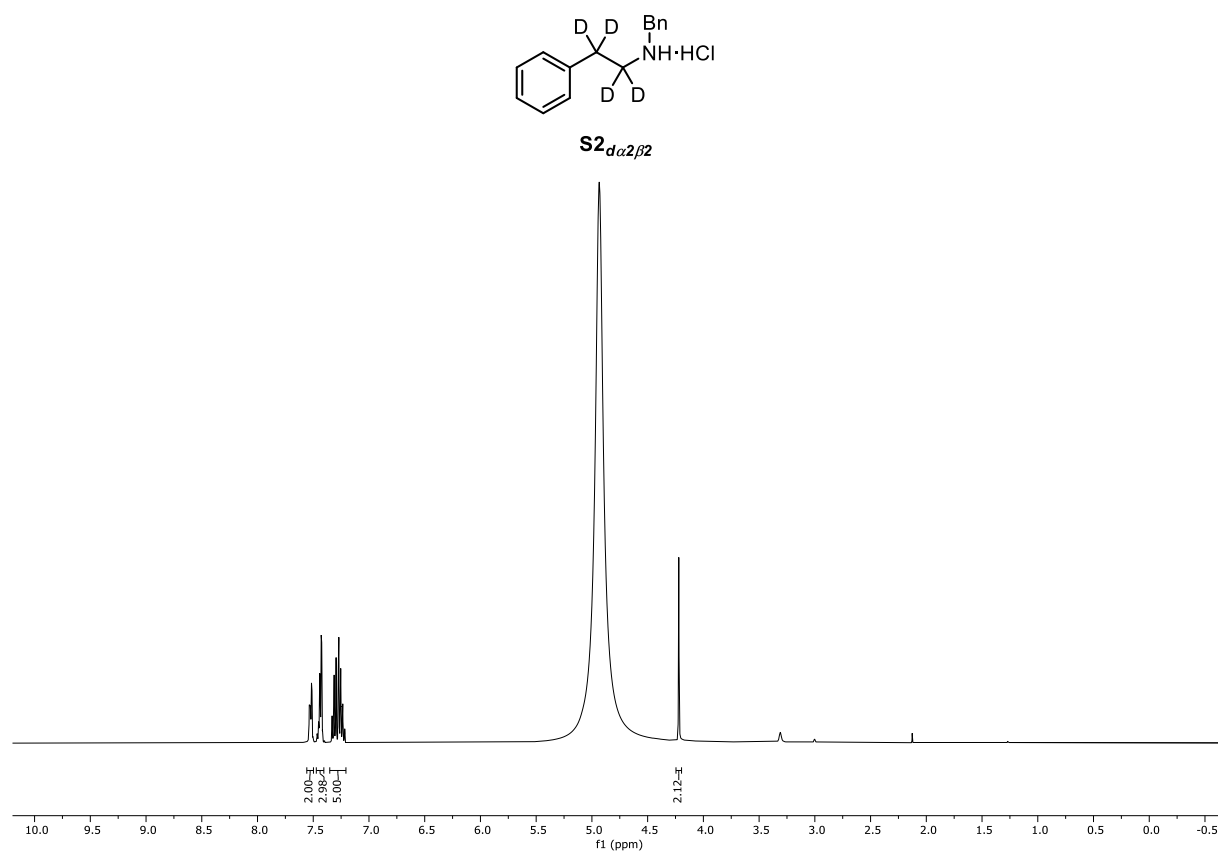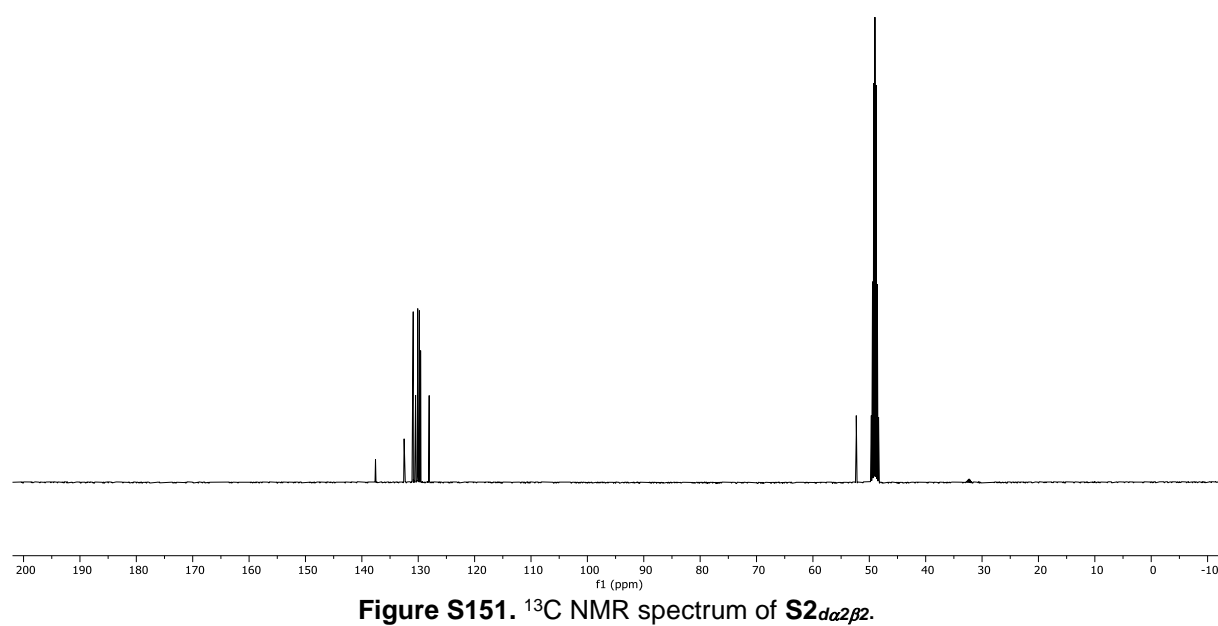

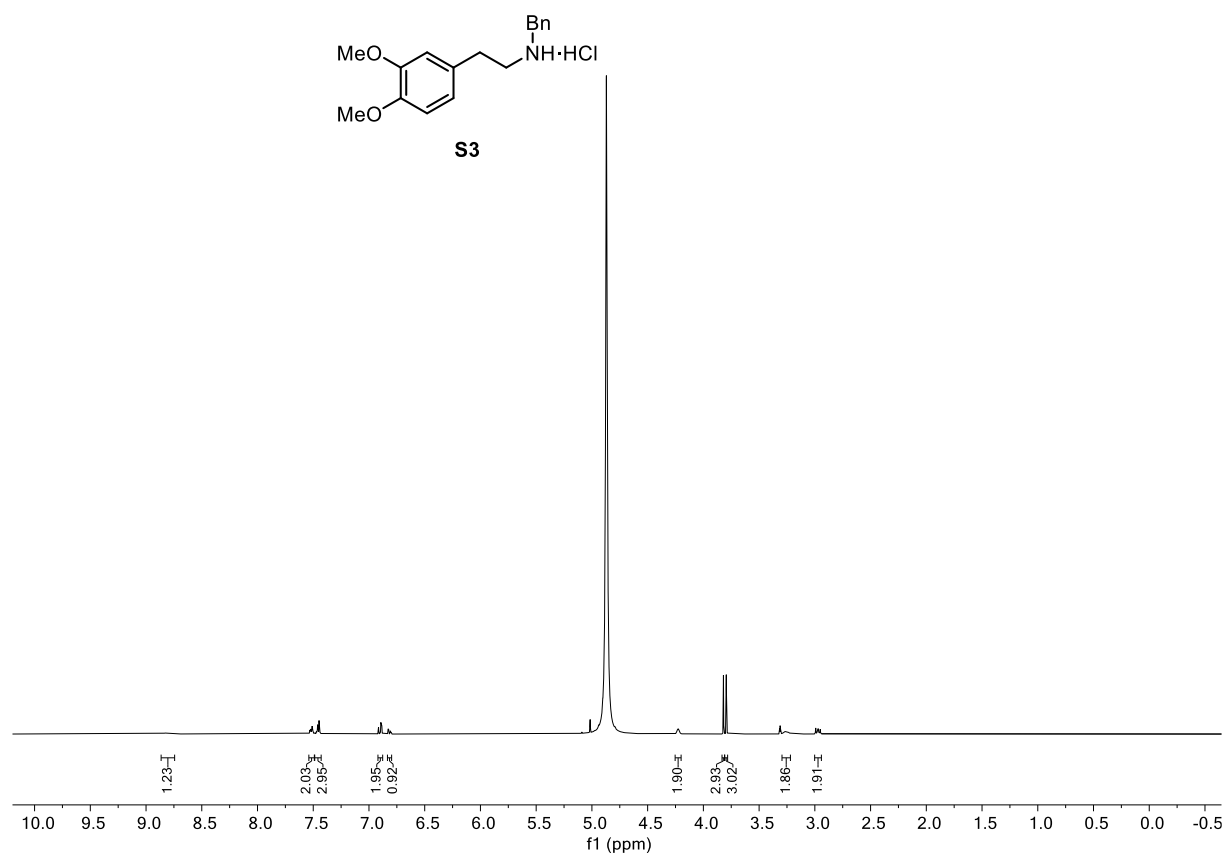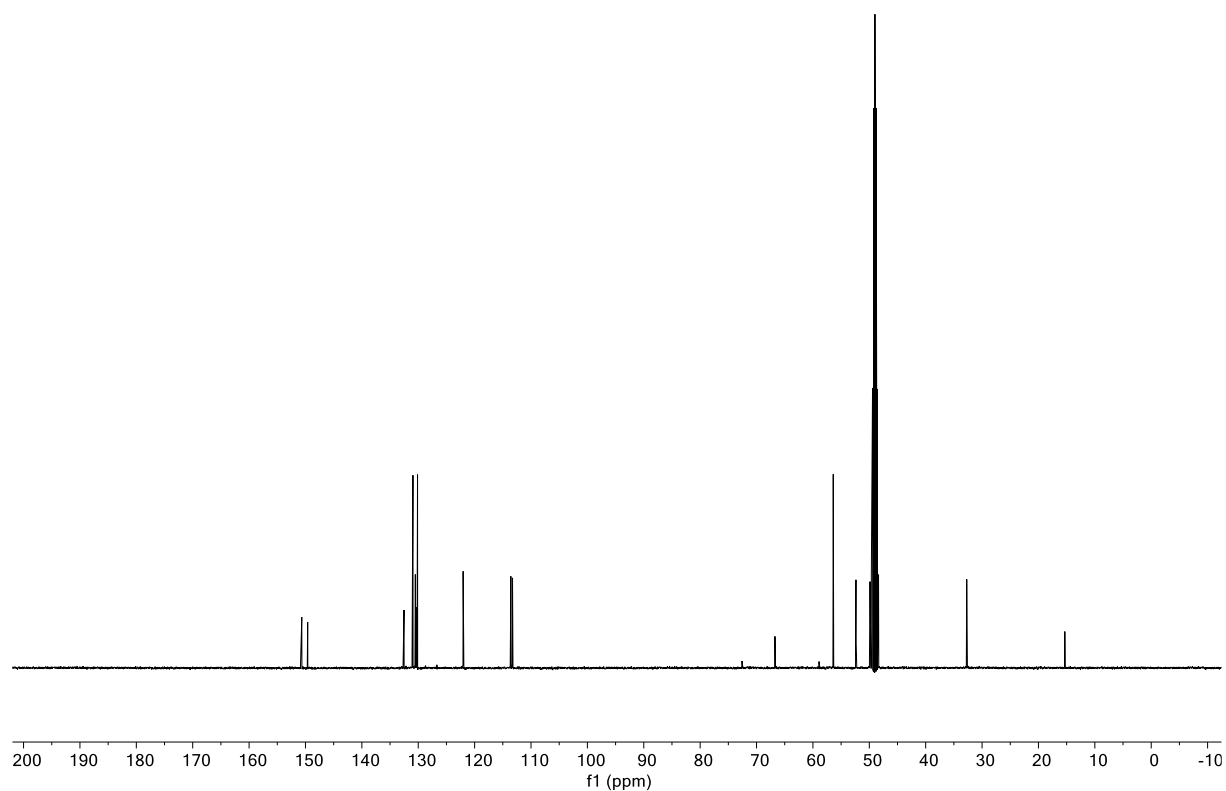

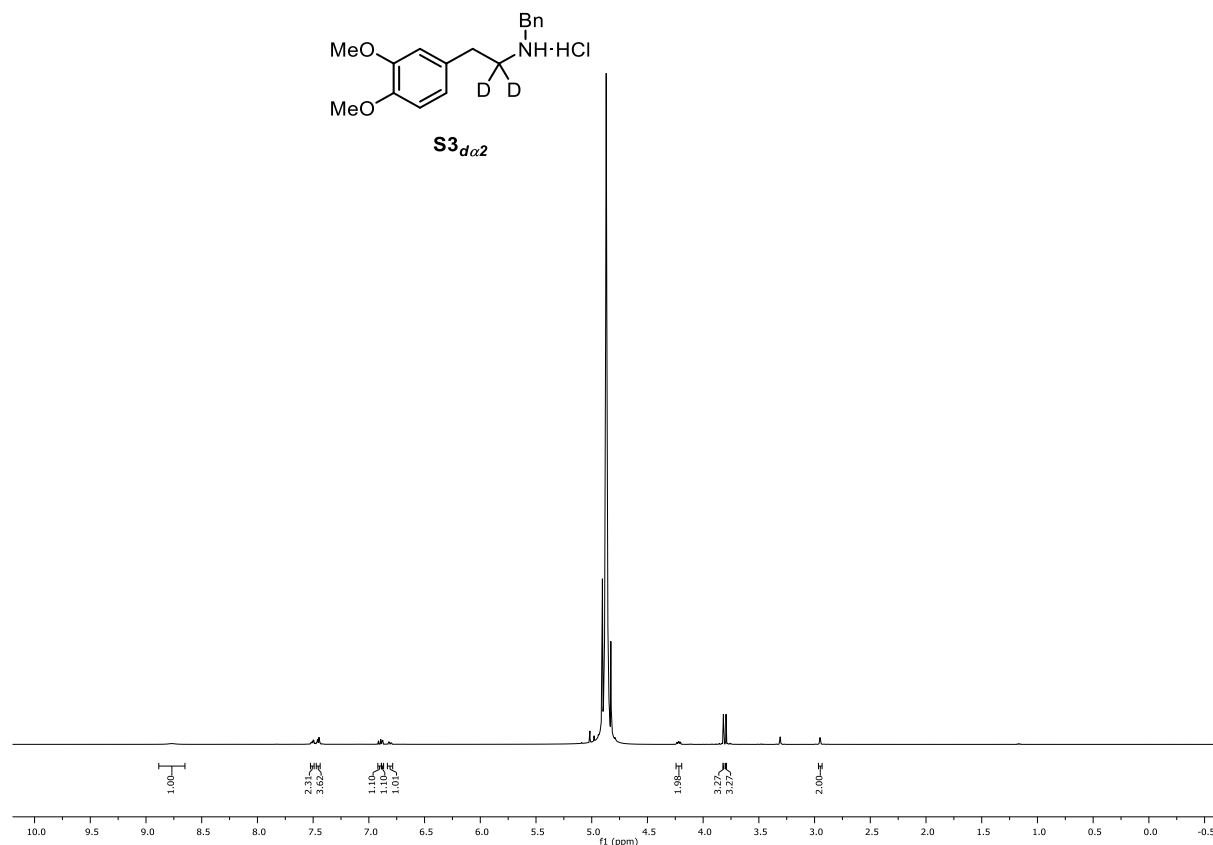

Figure S154. <sup>1</sup>H NMR spectrum of **S3<sub>da2</sub>**.

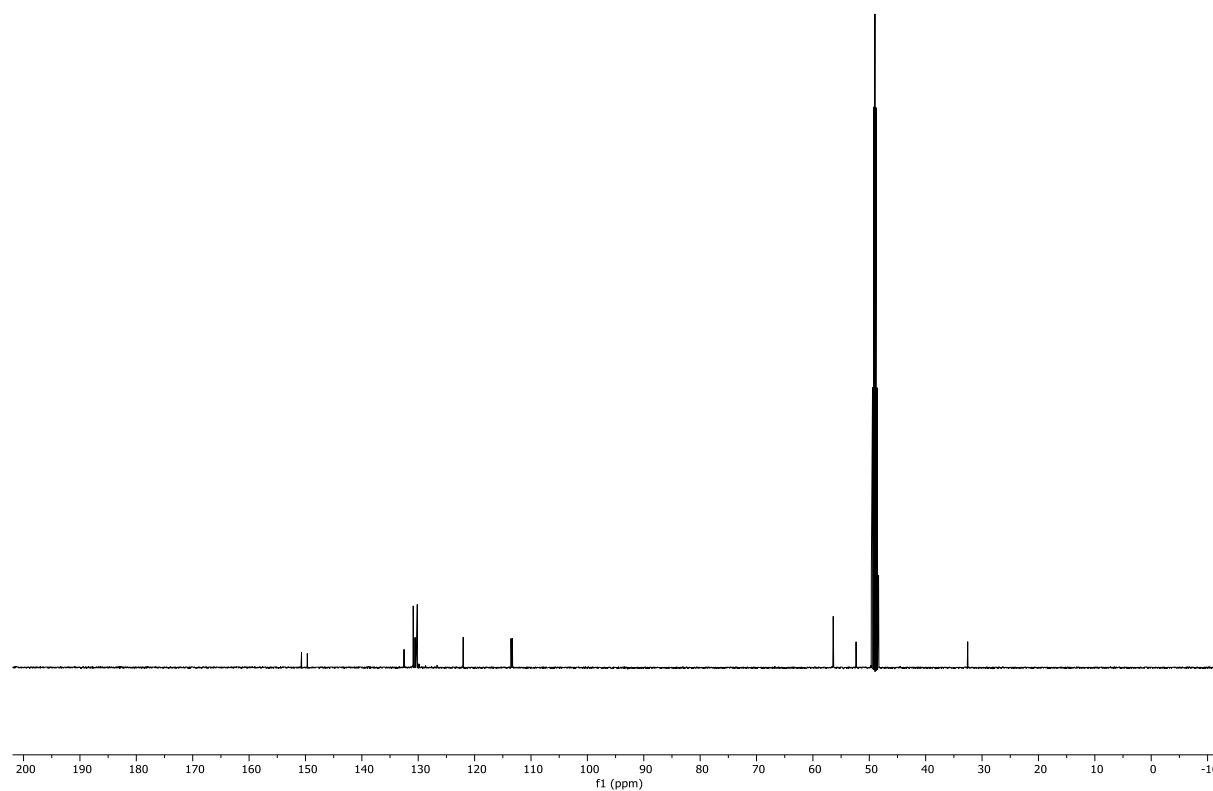

Figure S155. <sup>13</sup>C NMR spectrum of **S3<sub>da2</sub>**.

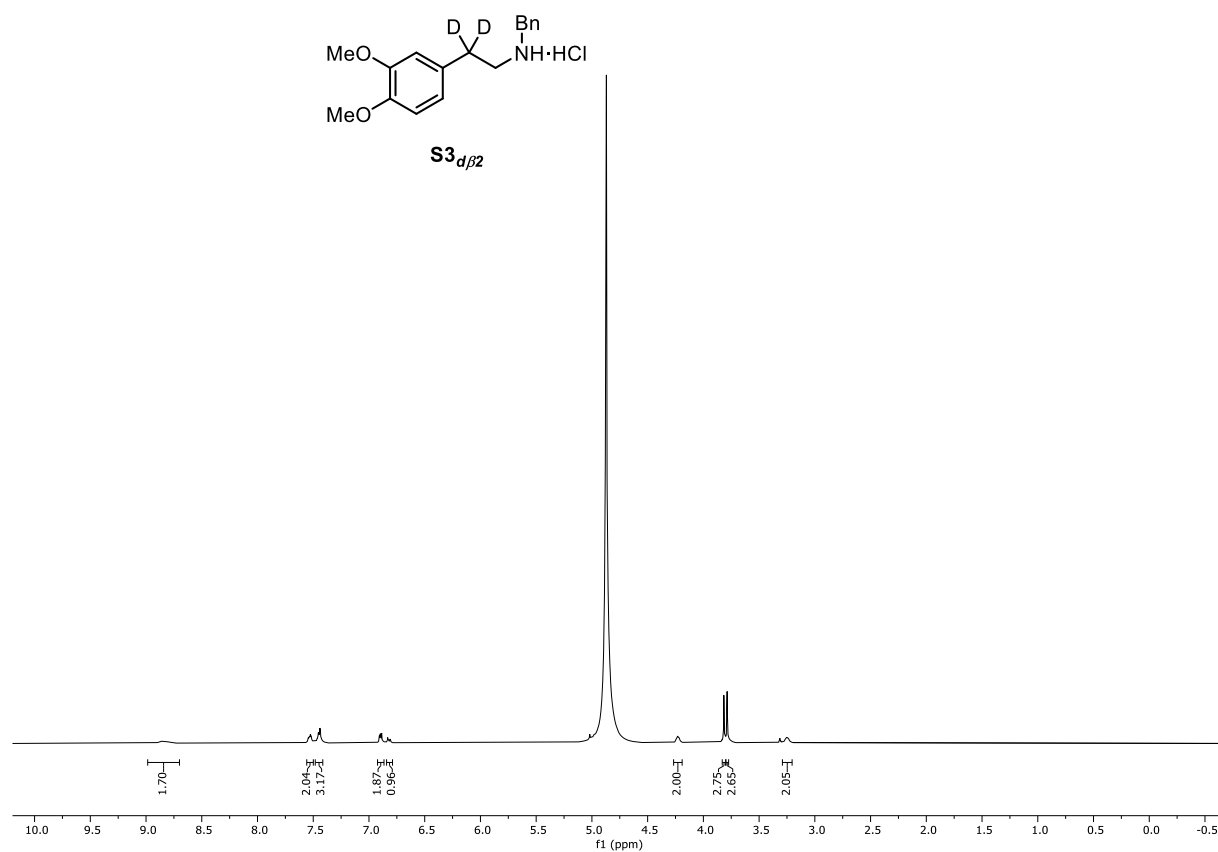

Figure S156. <sup>1</sup>H NMR spectrum of **S3<sub>dβ2</sub>**.

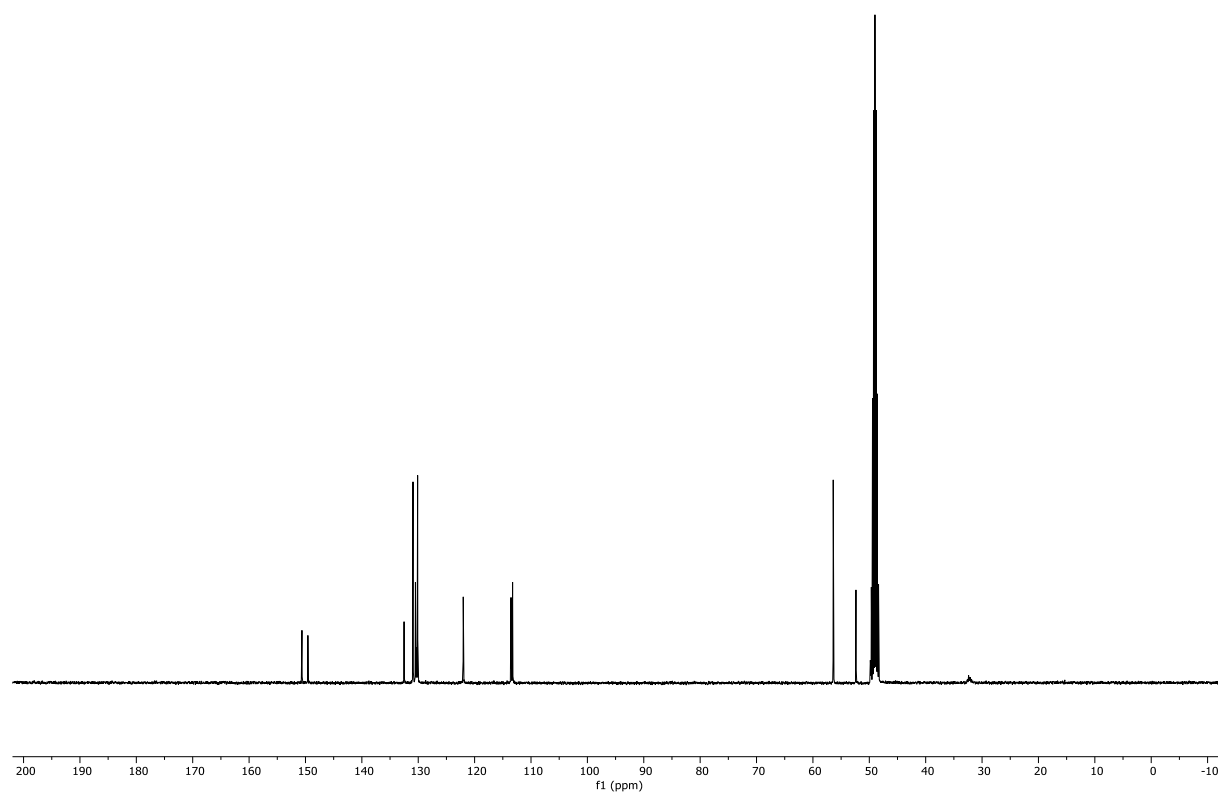

Figure S157. <sup>13</sup>C NMR spectrum of **S3<sub>dβ2</sub>**.

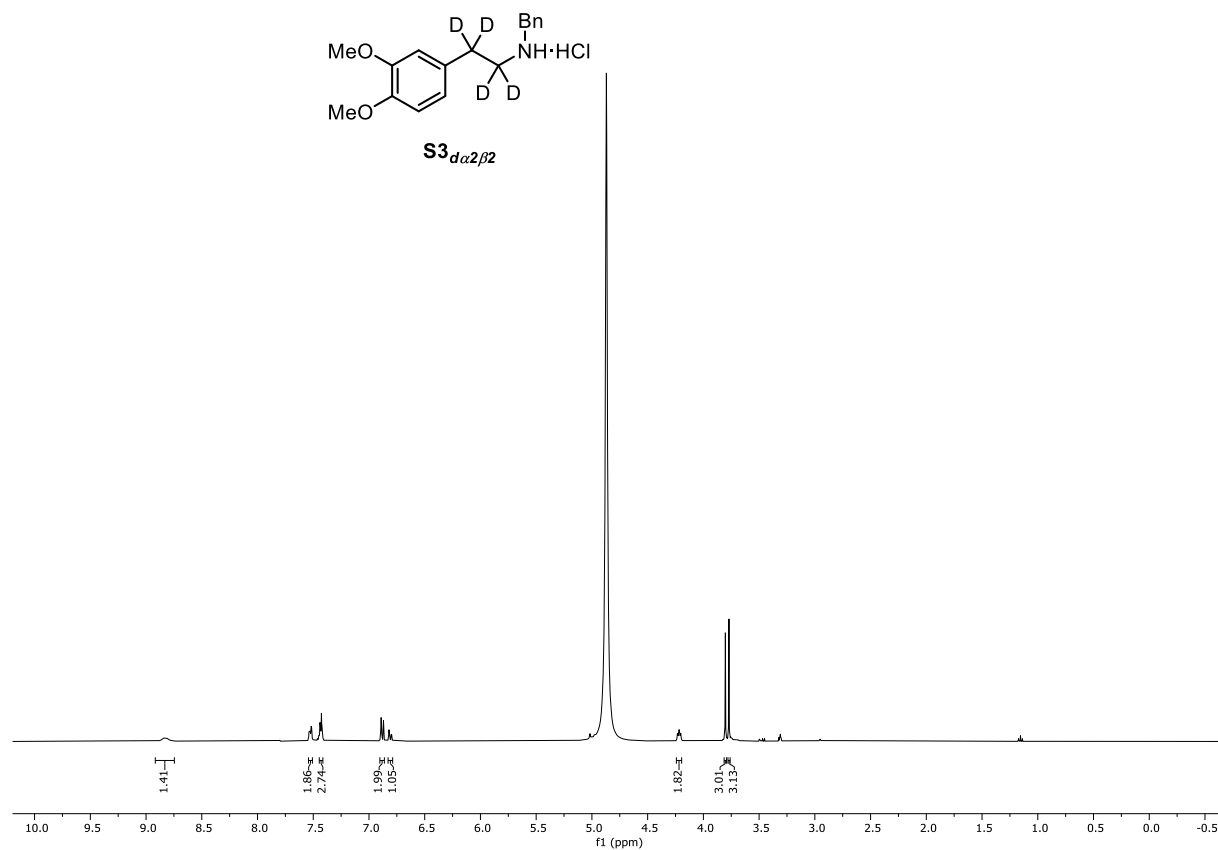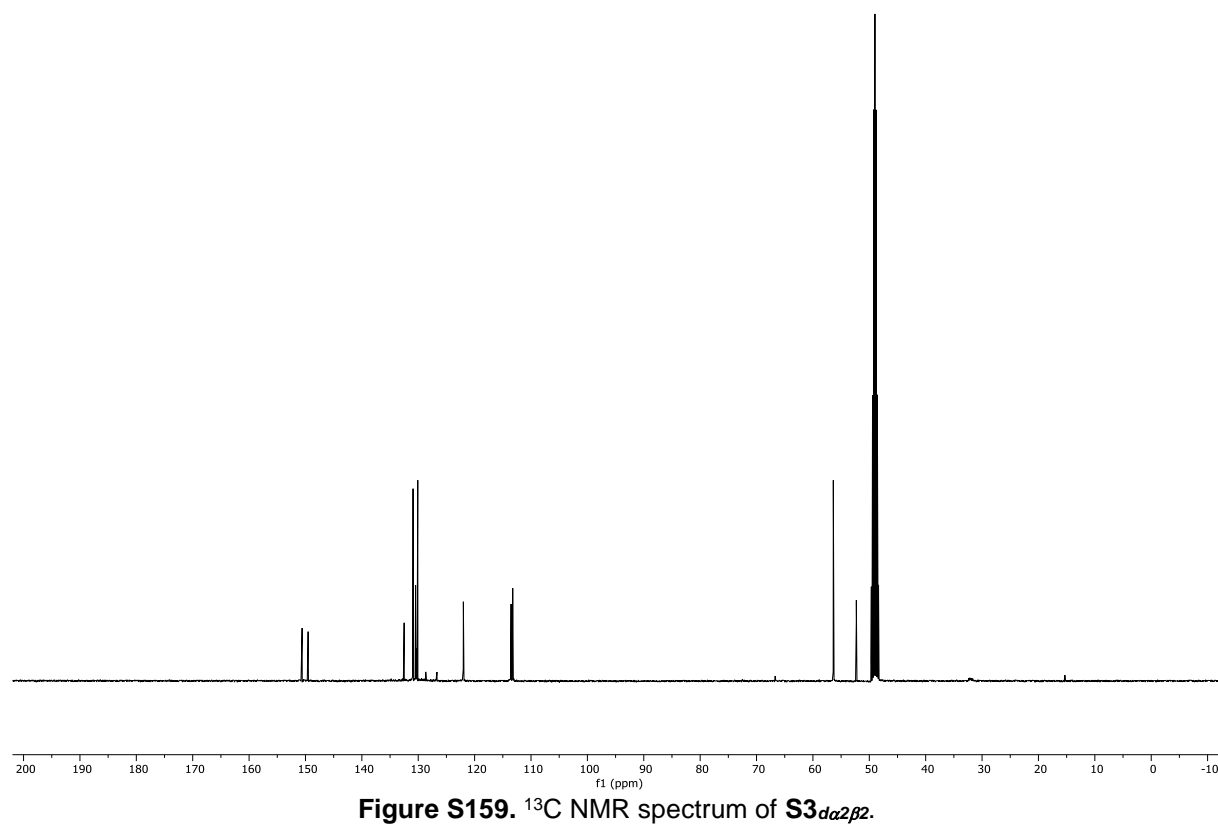

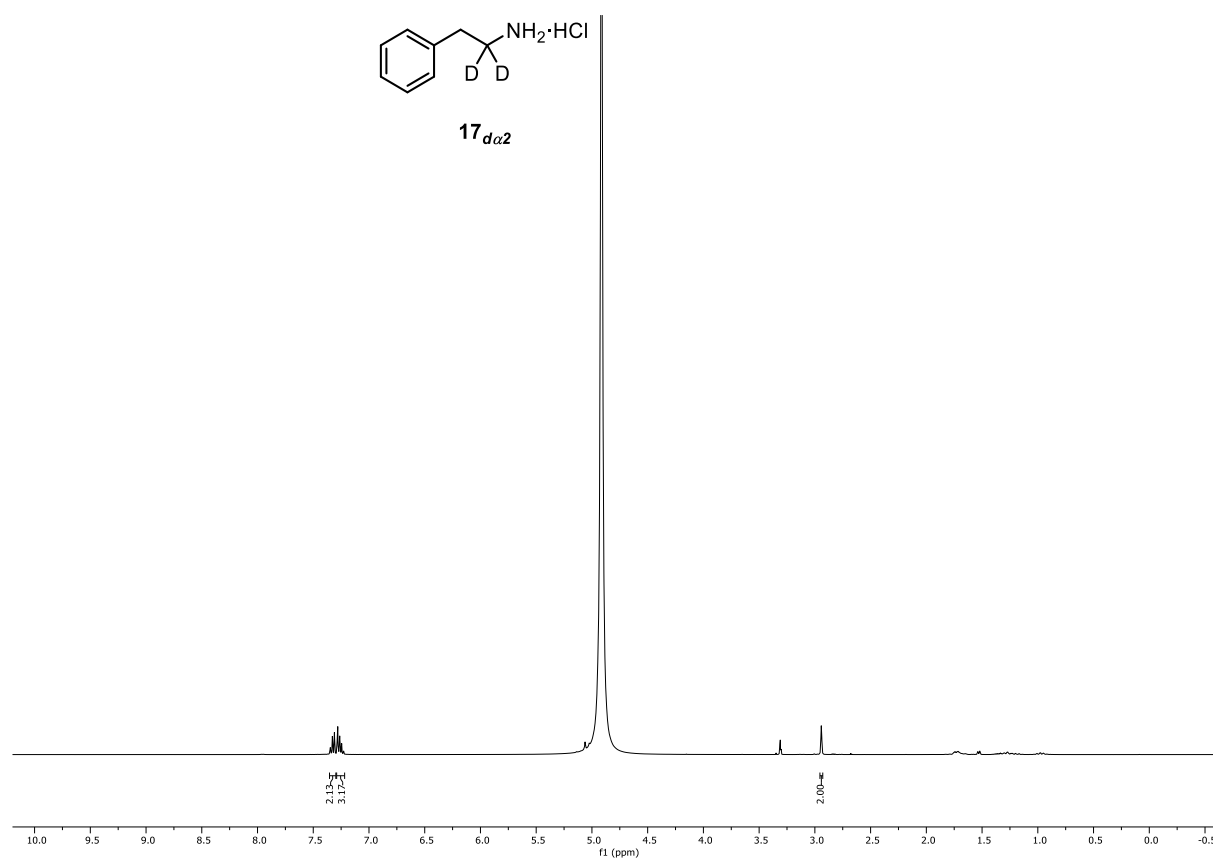

Figure S160. <sup>1</sup>H NMR spectrum of 17<sub>da2</sub>.

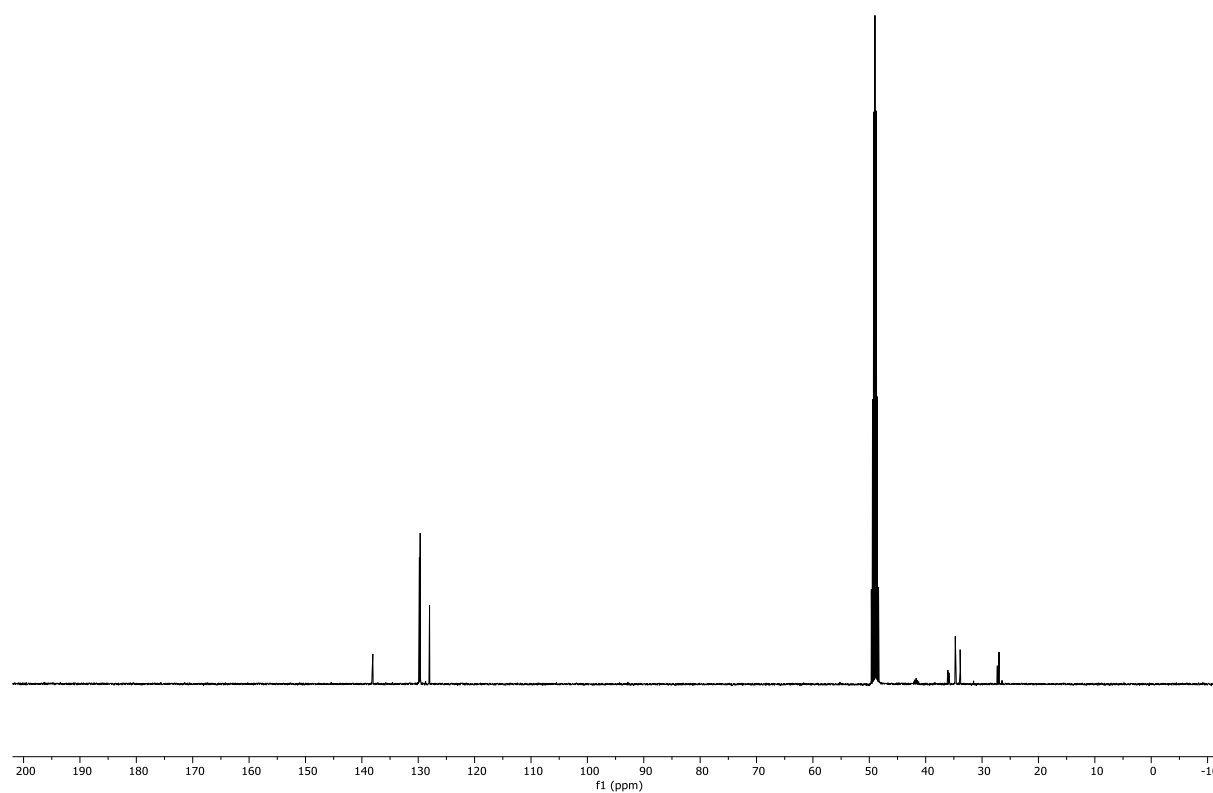

Figure S161. <sup>13</sup>C NMR spectrum of 17<sub>da2</sub>.

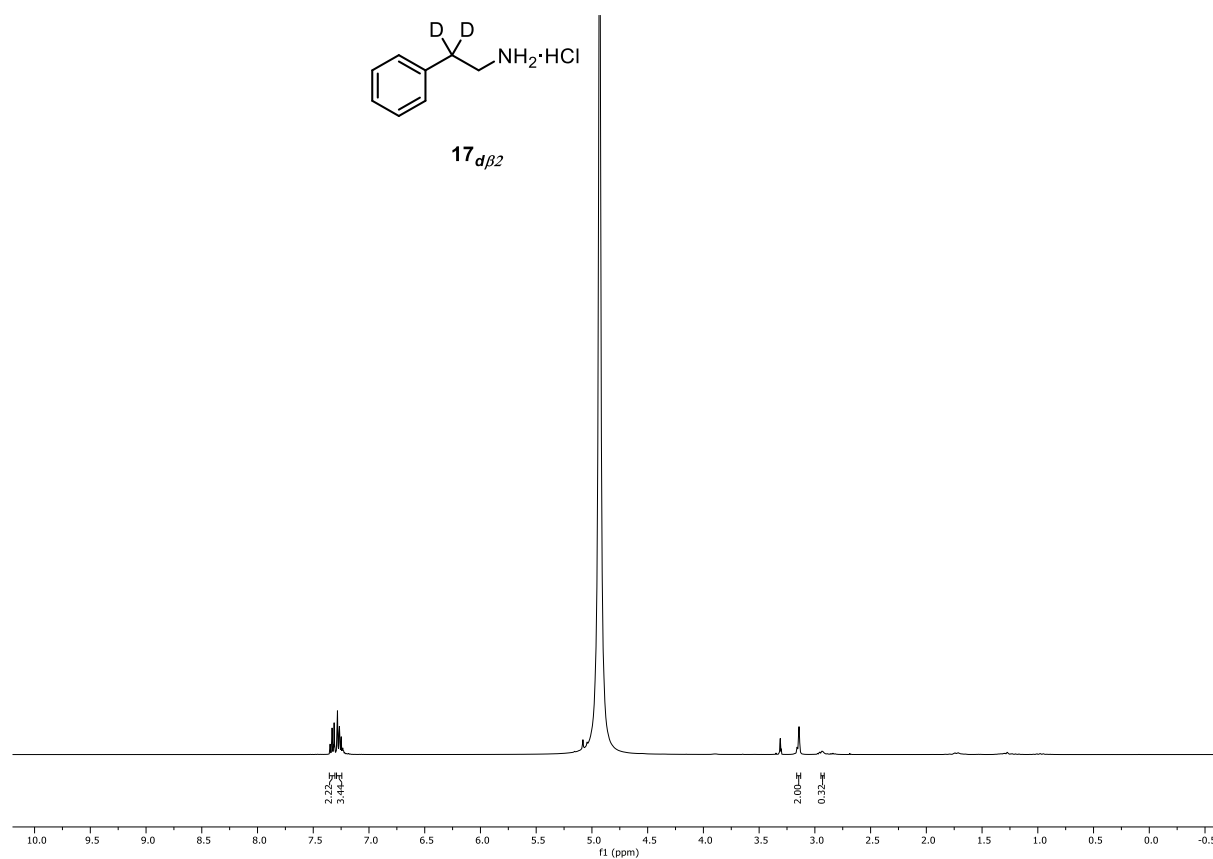

Figure S162. <sup>1</sup>H NMR spectrum of 17<sub>dβ2</sub>.

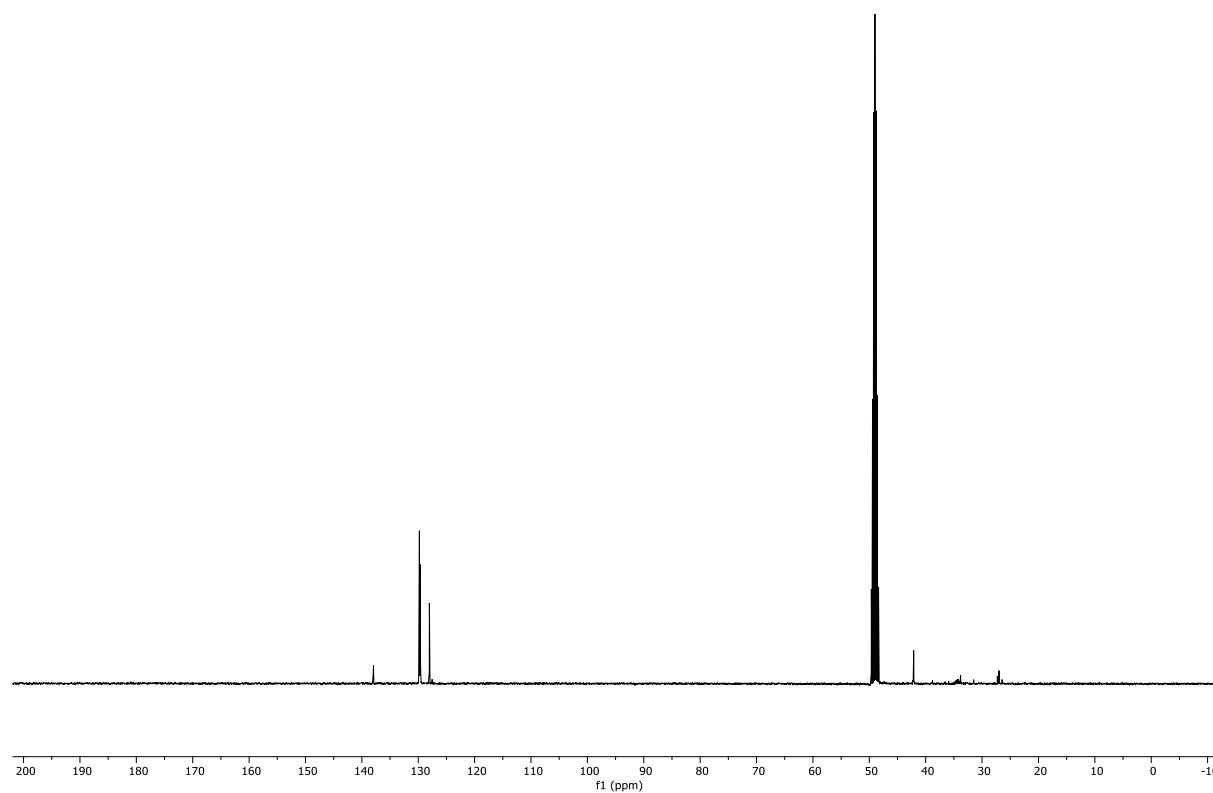

Figure S163. <sup>13</sup>C NMR spectrum of 17<sub>dβ2</sub>.



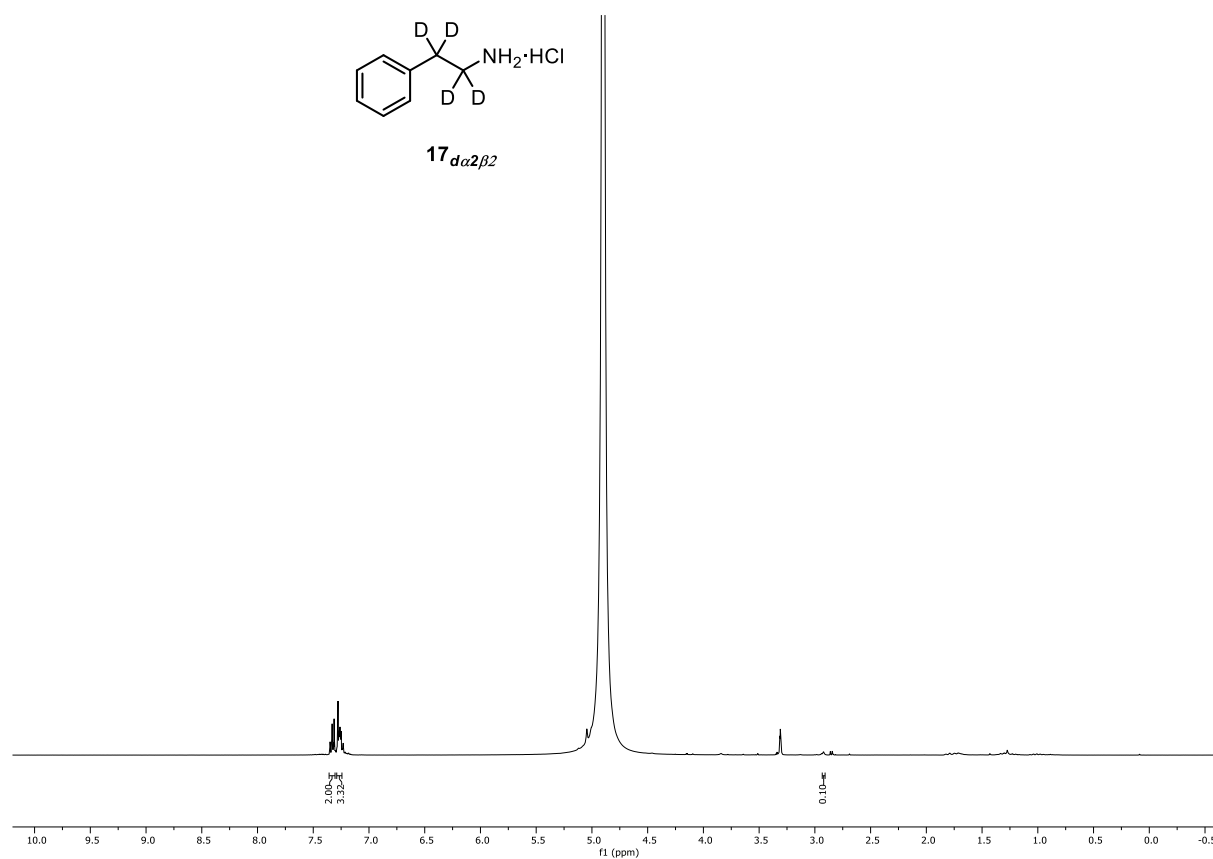

Figure S164. <sup>1</sup>H NMR spectrum of 17<sub>dα2β2</sub>.

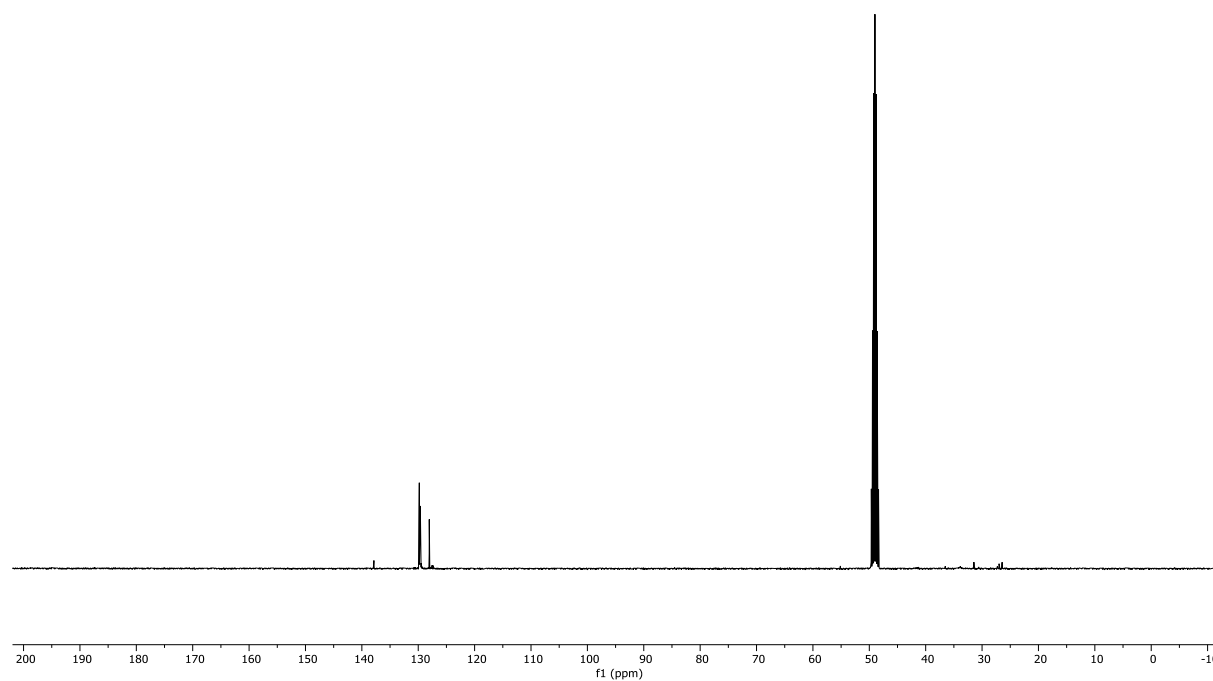

Figure S165. <sup>13</sup>C NMR spectrum of 17<sub>dα2β2</sub>.

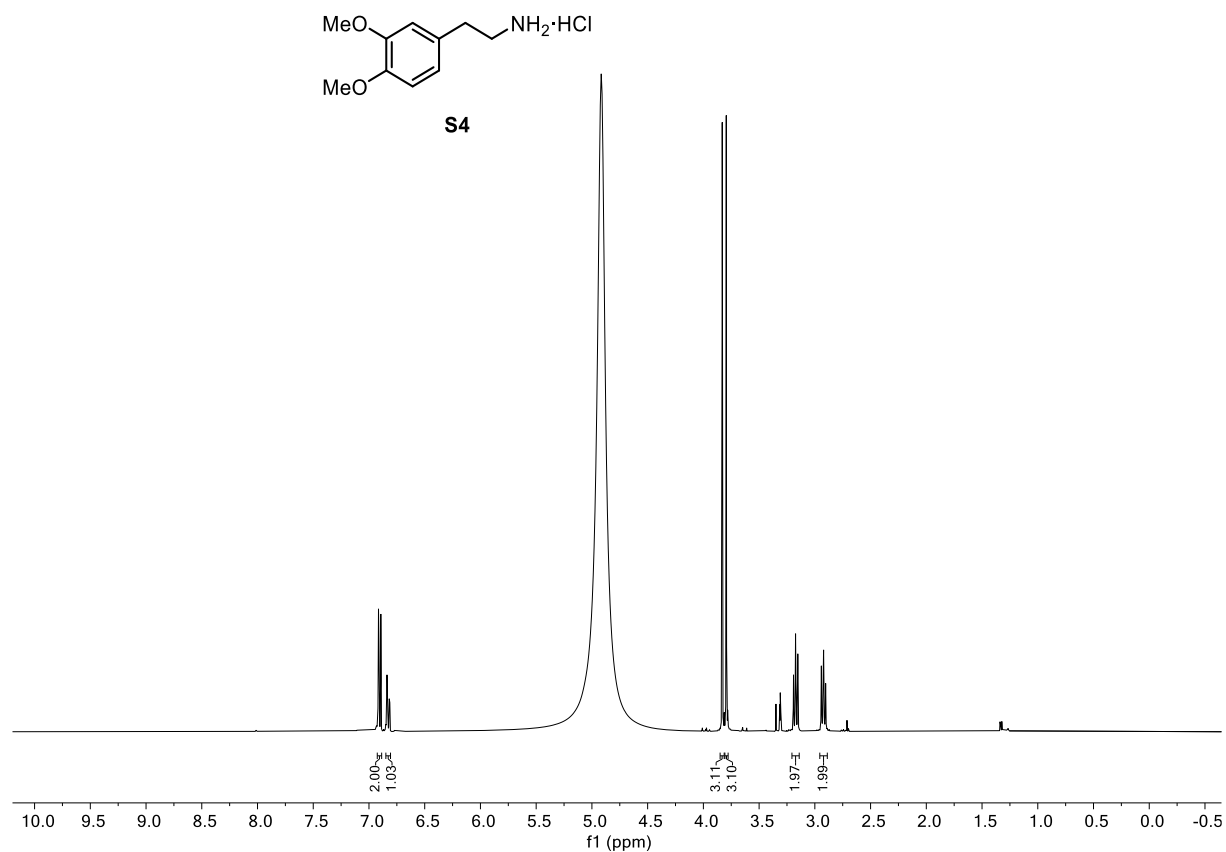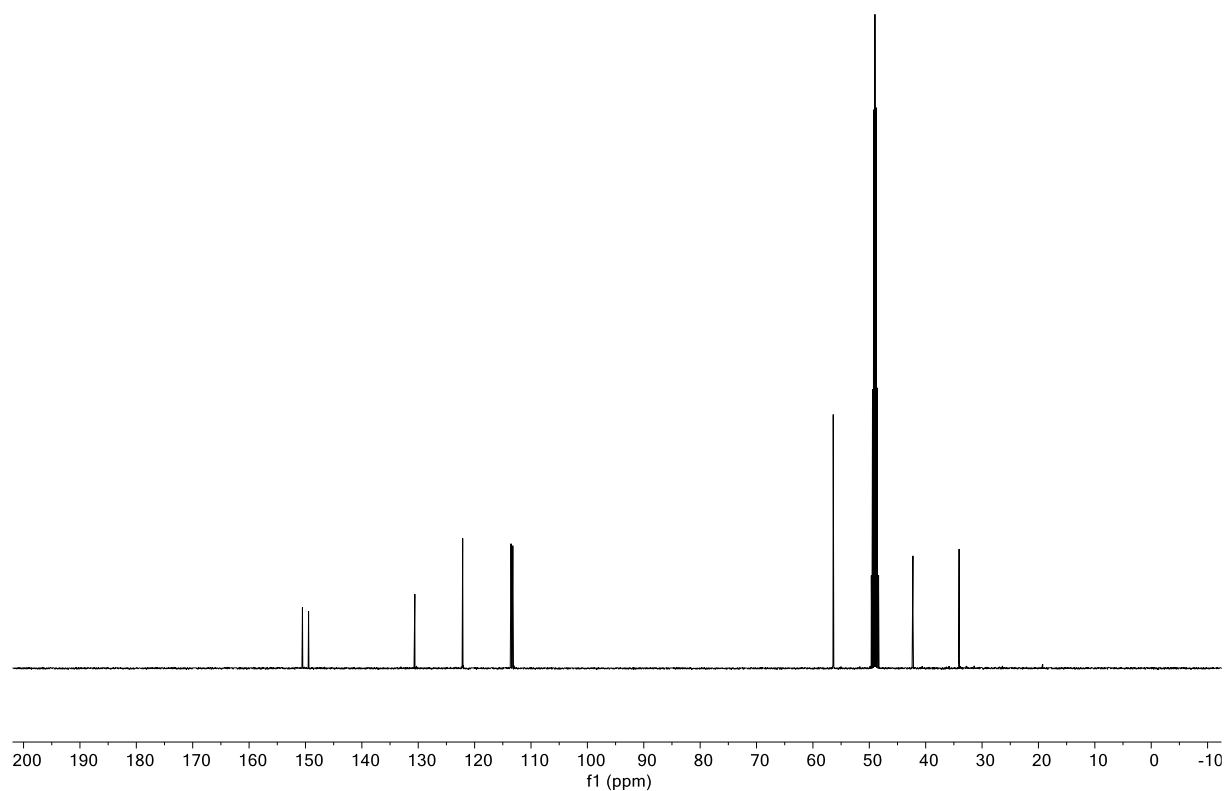

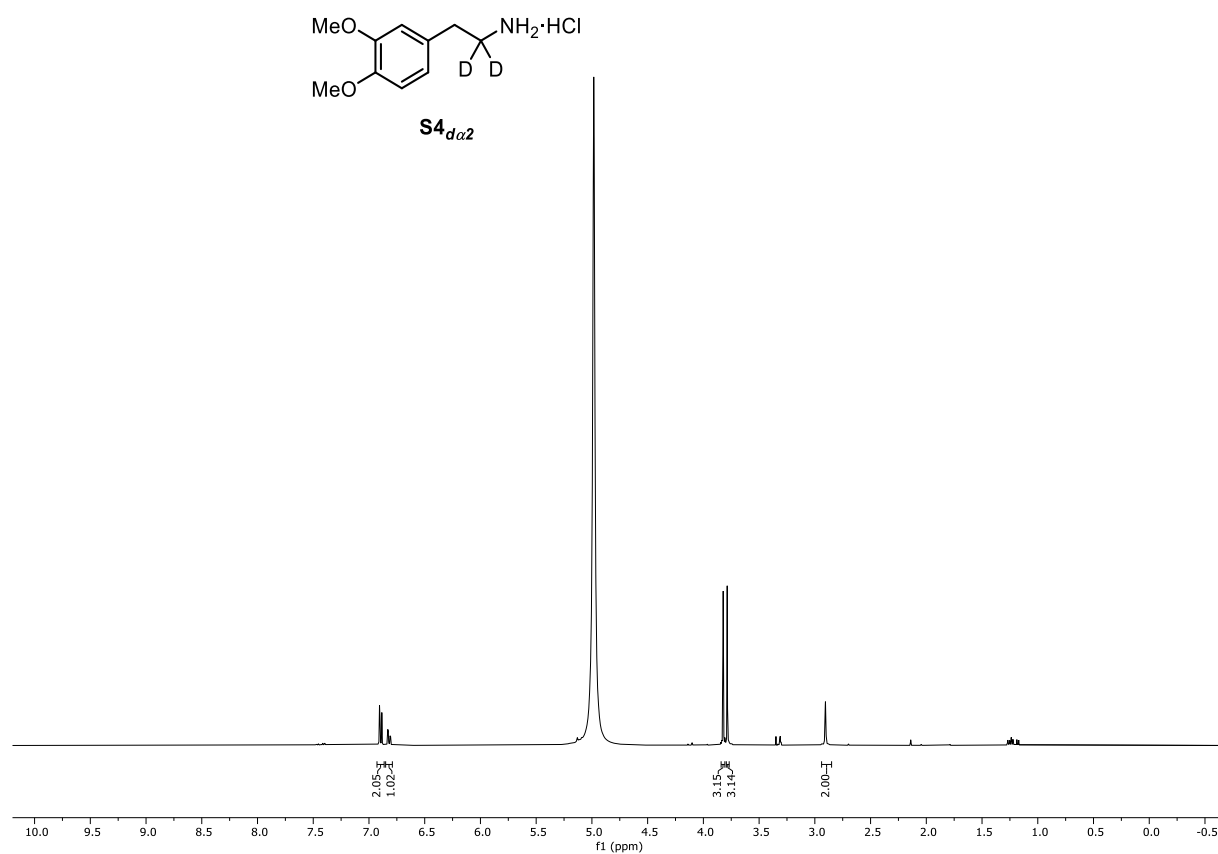

Figure S168. <sup>1</sup>H NMR spectrum of **S4<sub>da2</sub>**.

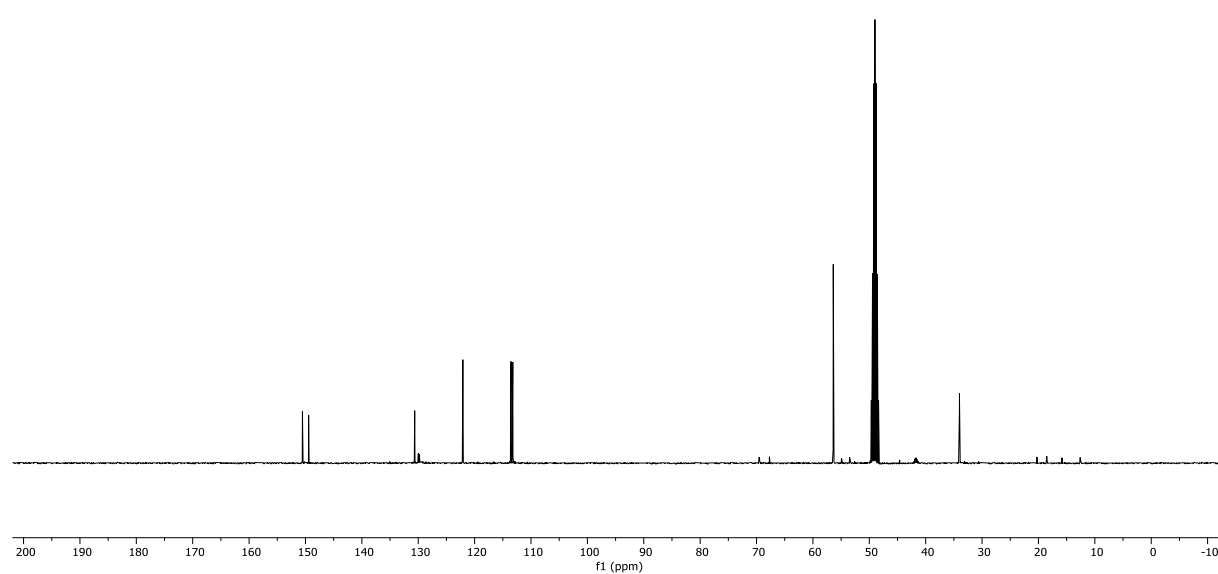

Figure S169. <sup>13</sup>C NMR spectrum of **S4<sub>da2</sub>**.

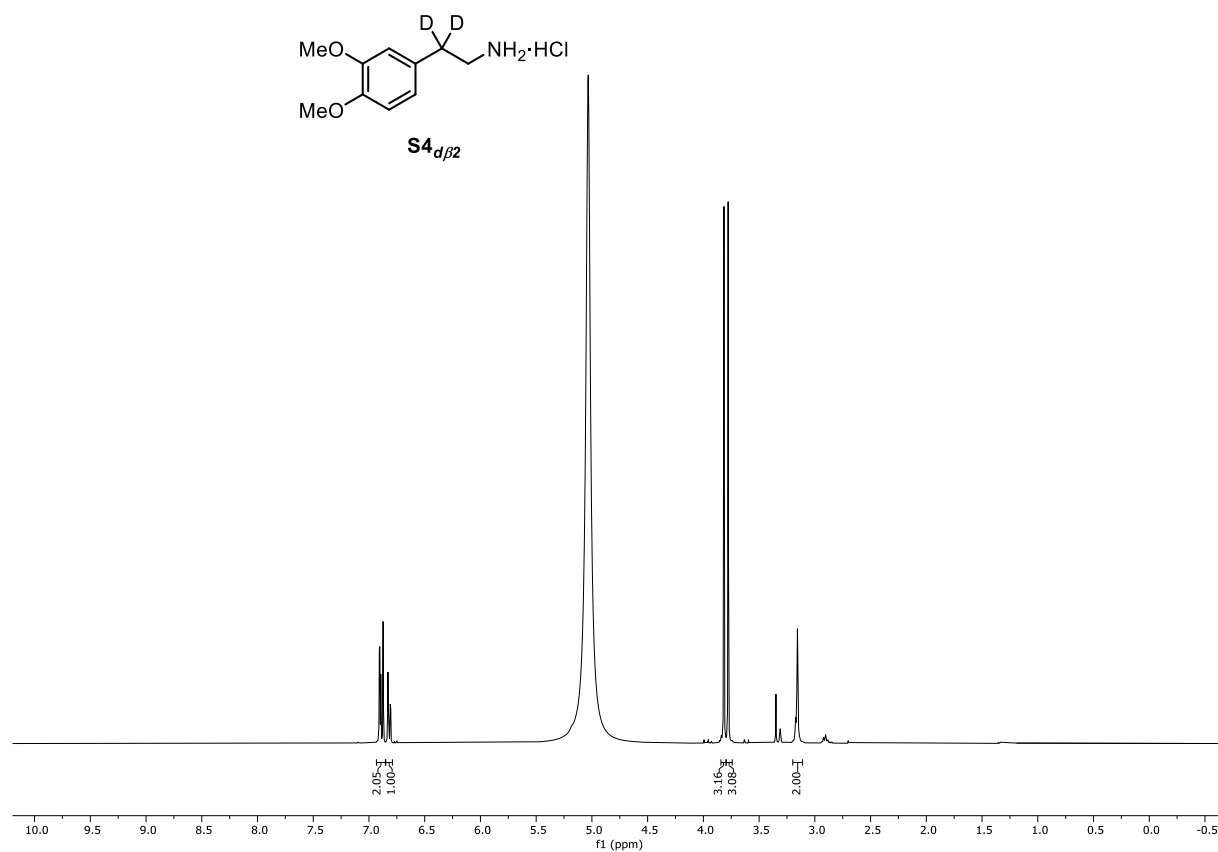

Figure S170. <sup>1</sup>H NMR spectrum of **S4<sub>dβ2</sub>**.

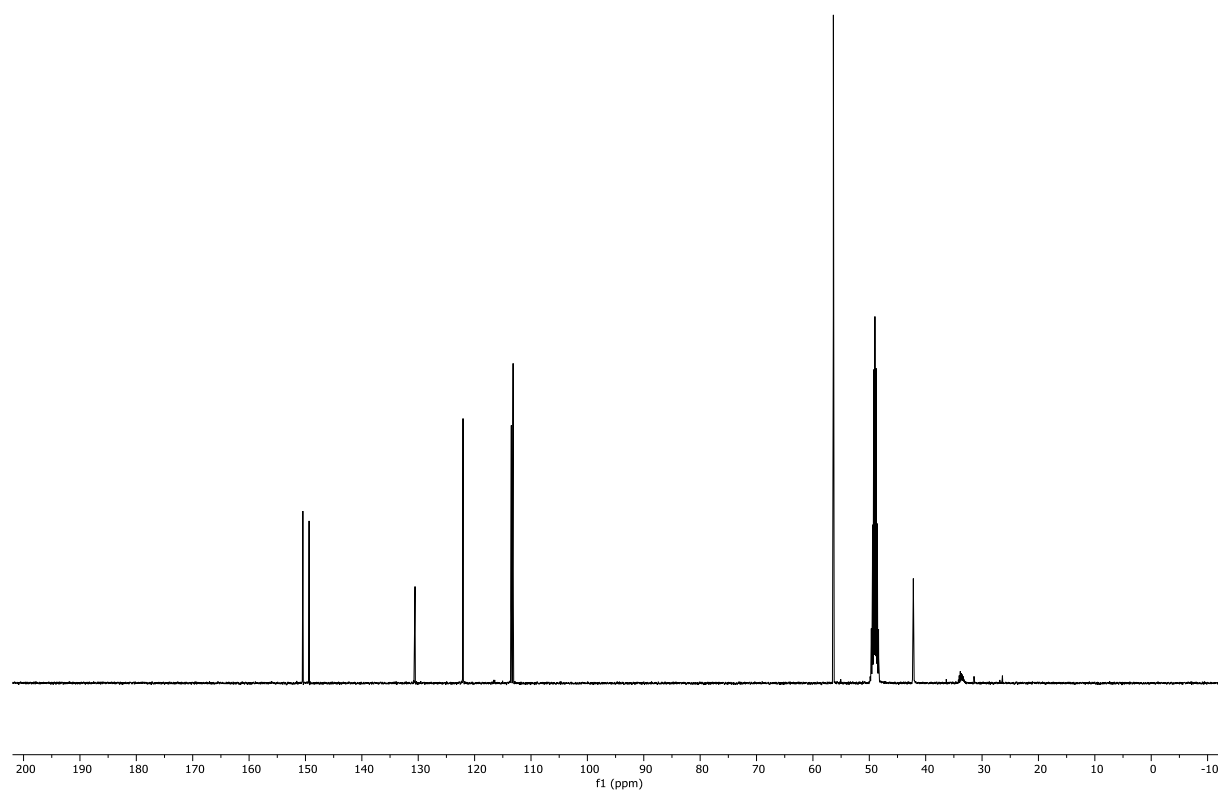

Figure S171. <sup>13</sup>C NMR spectrum of **S4<sub>dβ2</sub>**.

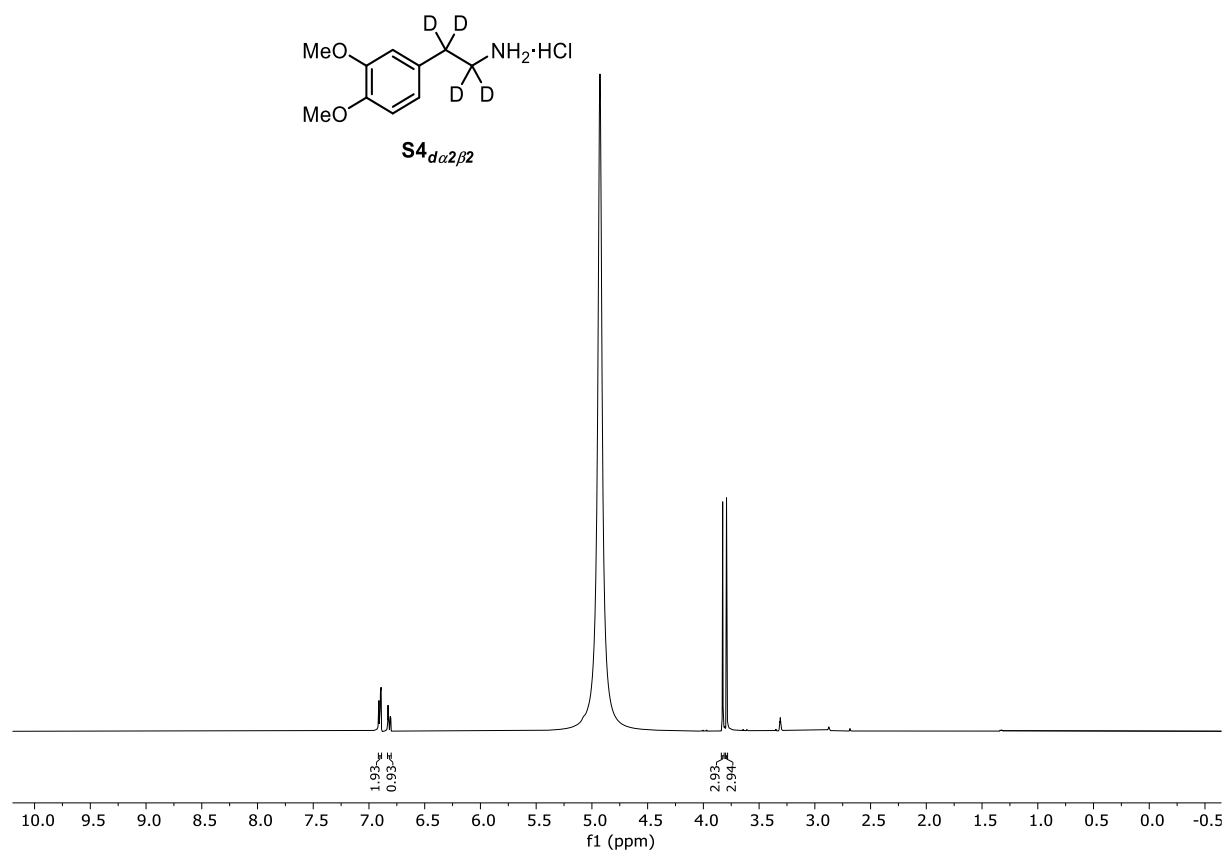

Figure S172. <sup>1</sup>H NMR spectrum of **S4<sub>dα2β2</sub>**.

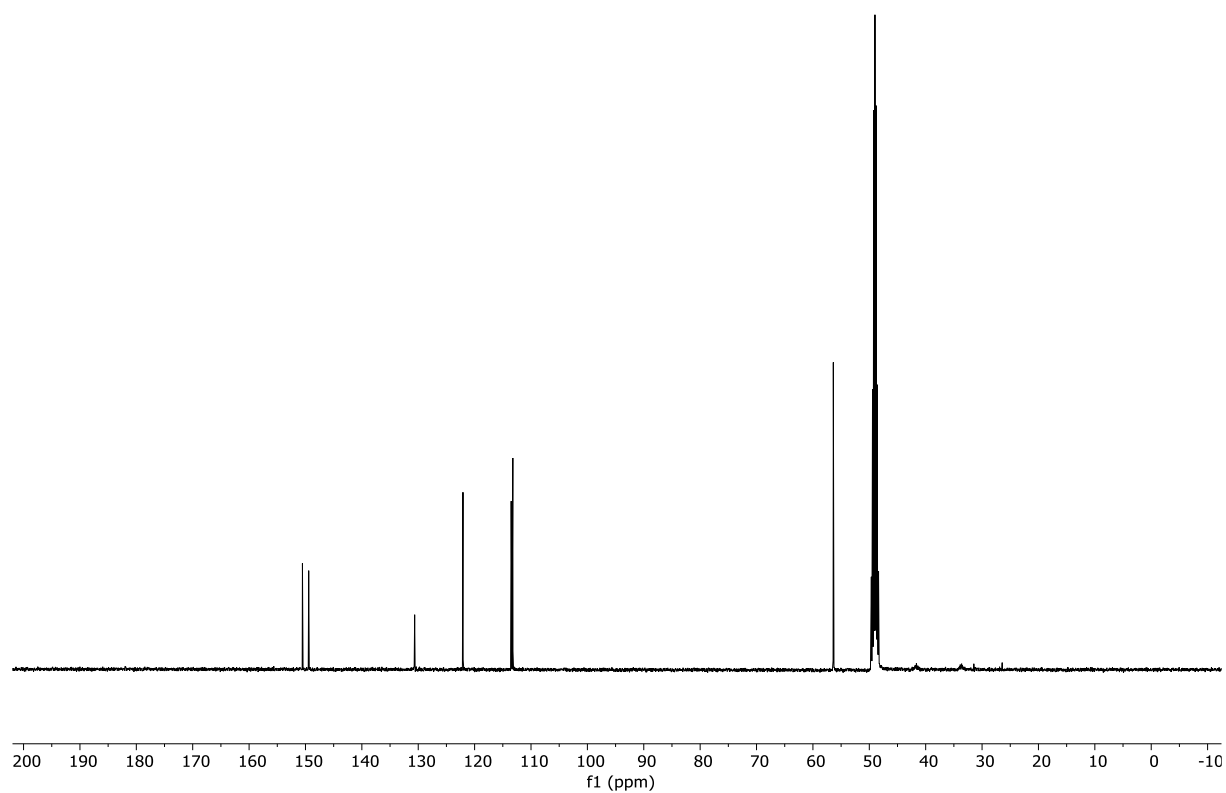

Figure S173. <sup>13</sup>C NMR spectrum of **S4<sub>dα2β2</sub>**.

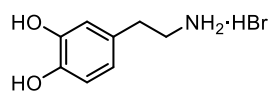

19

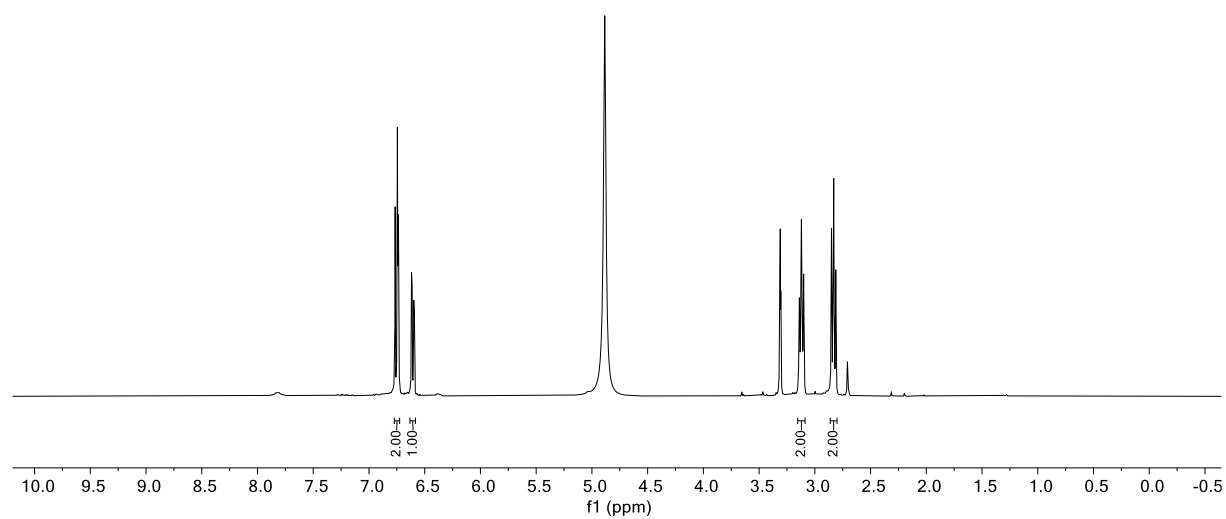

Figure S174. <sup>1</sup>H NMR spectrum of 19.

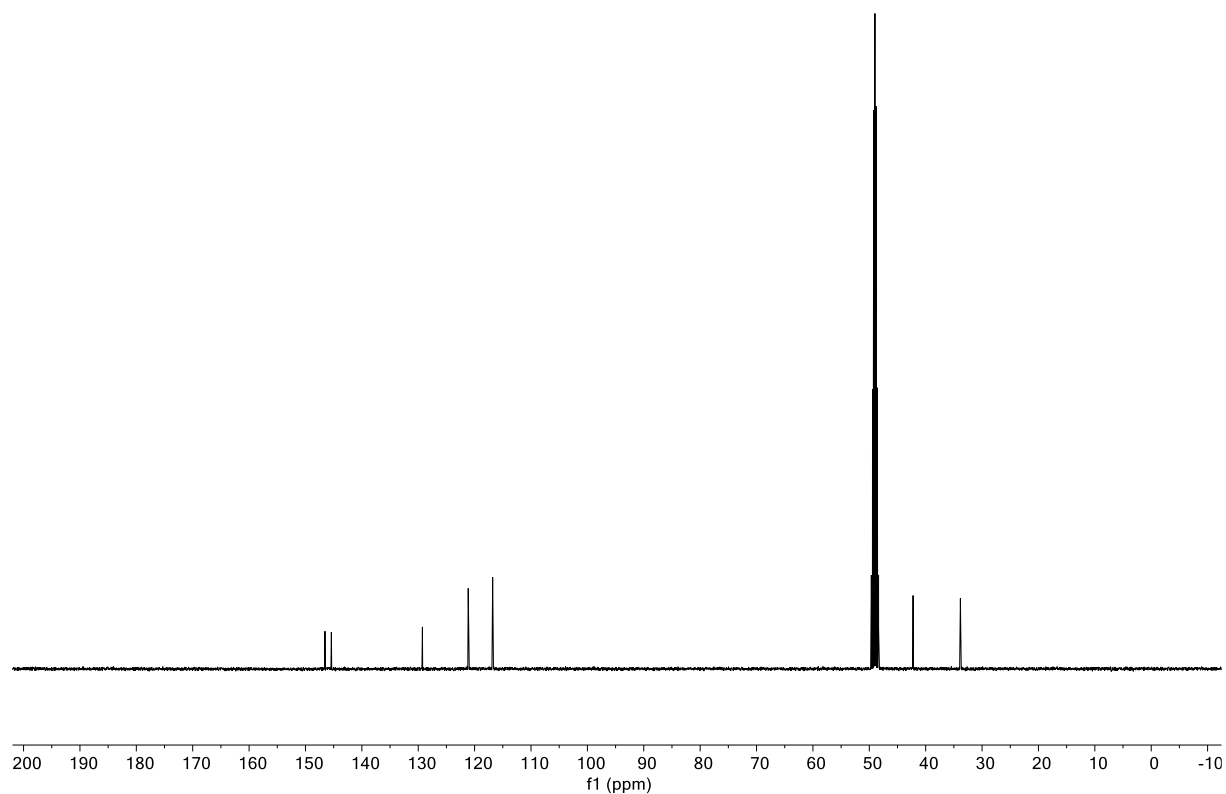

Figure S175. <sup>13</sup>C NMR spectrum of 19.

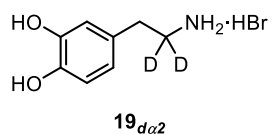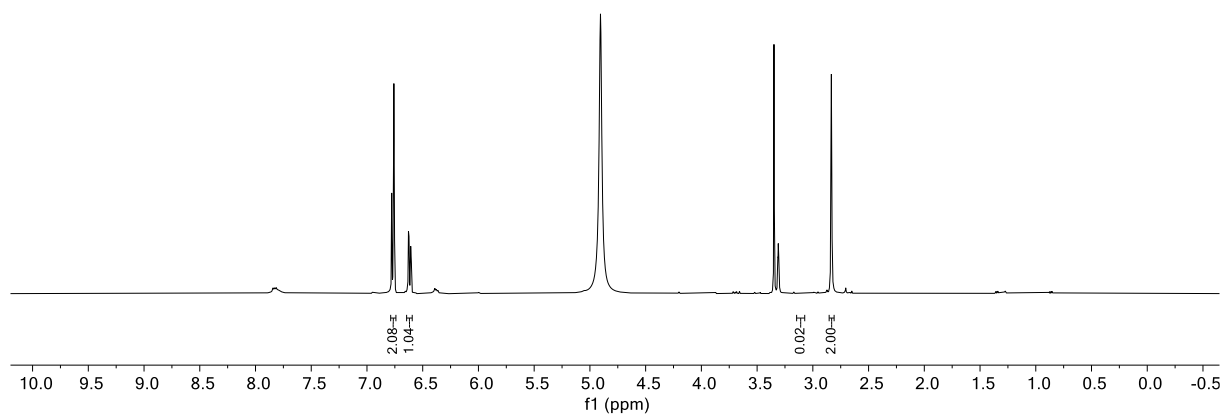

**Figure S176.** <sup>1</sup>H NMR spectrum of **19<sub>da2</sub>**.

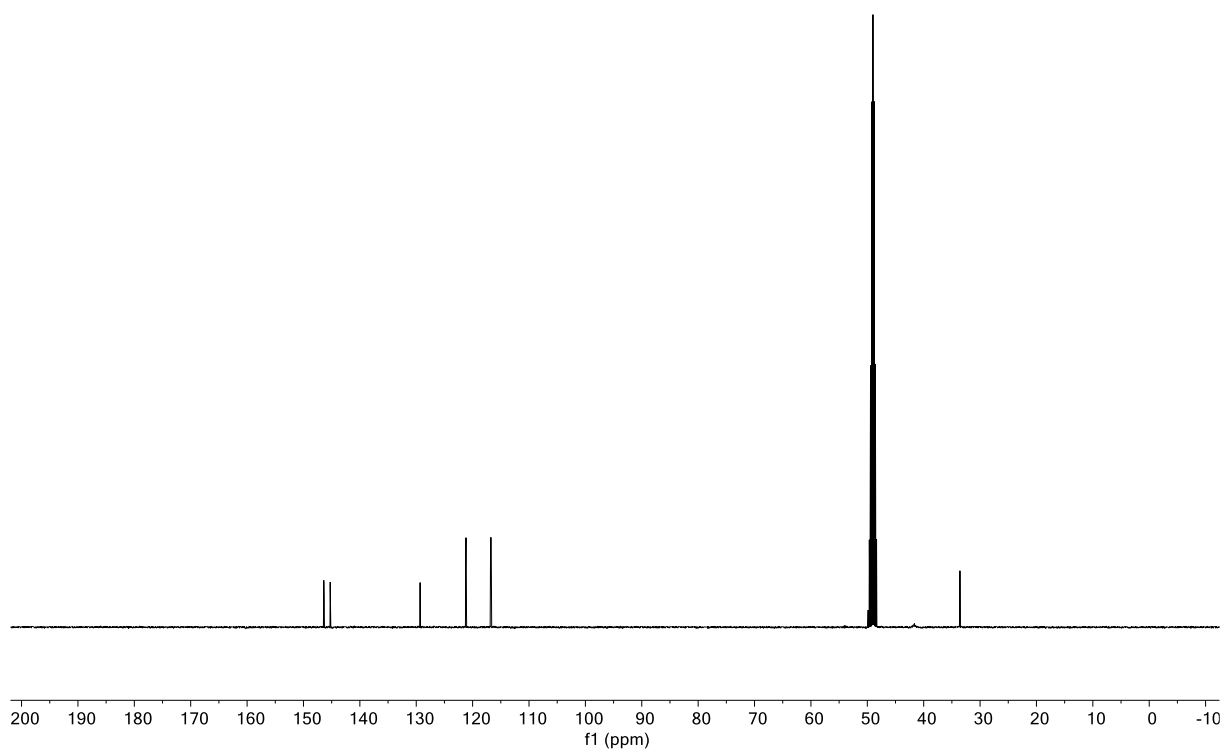

**Figure S177.** <sup>13</sup>C NMR spectrum of **19<sub>da2</sub>**.

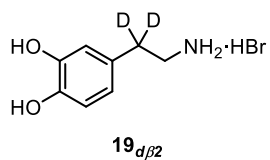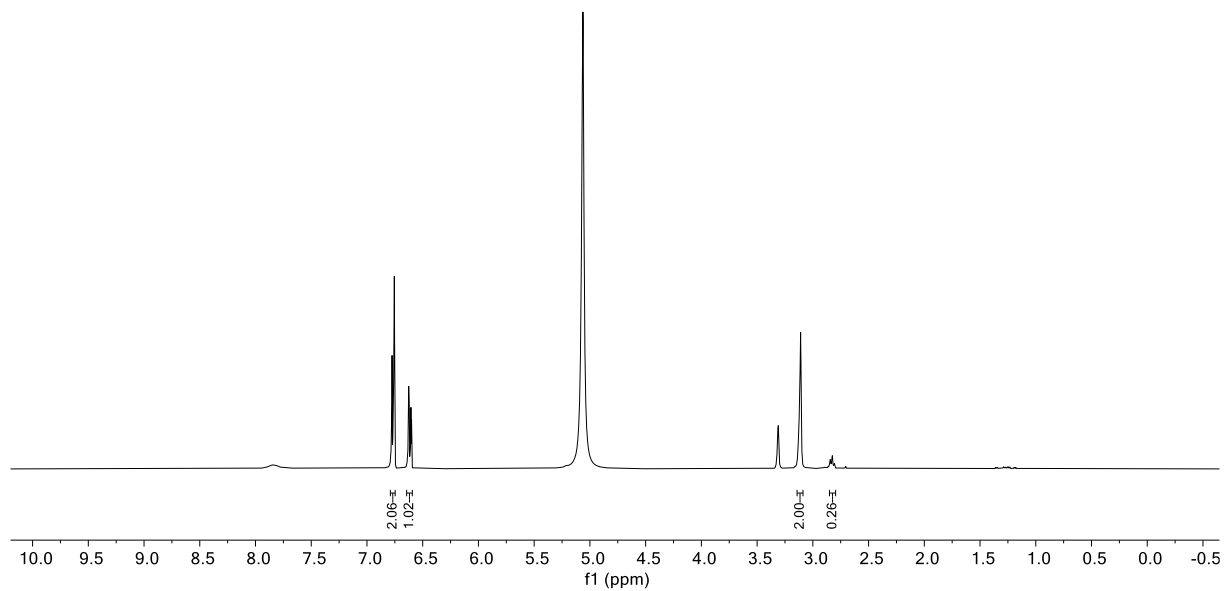

Figure S178. <sup>1</sup>H NMR spectrum of **19<sub>dβ2</sub>**.

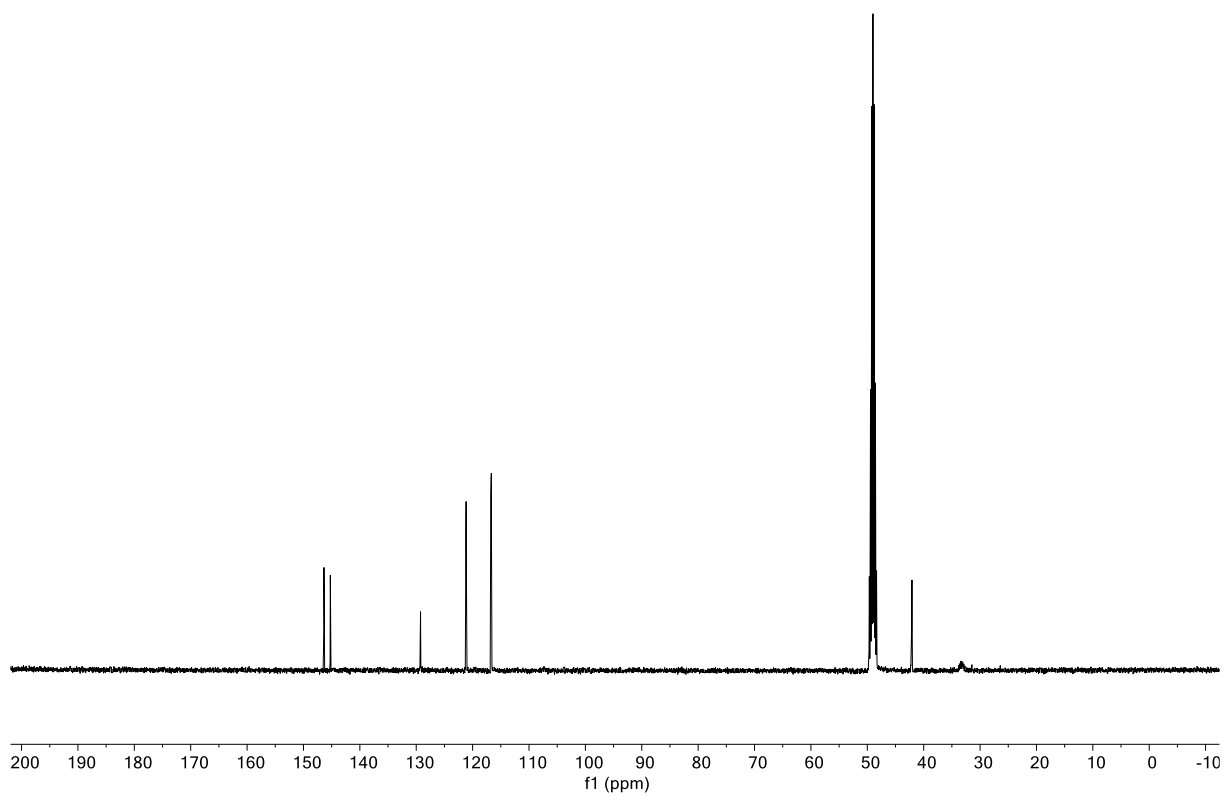

Figure S179. <sup>13</sup>C NMR spectrum of **19<sub>dβ2</sub>**.



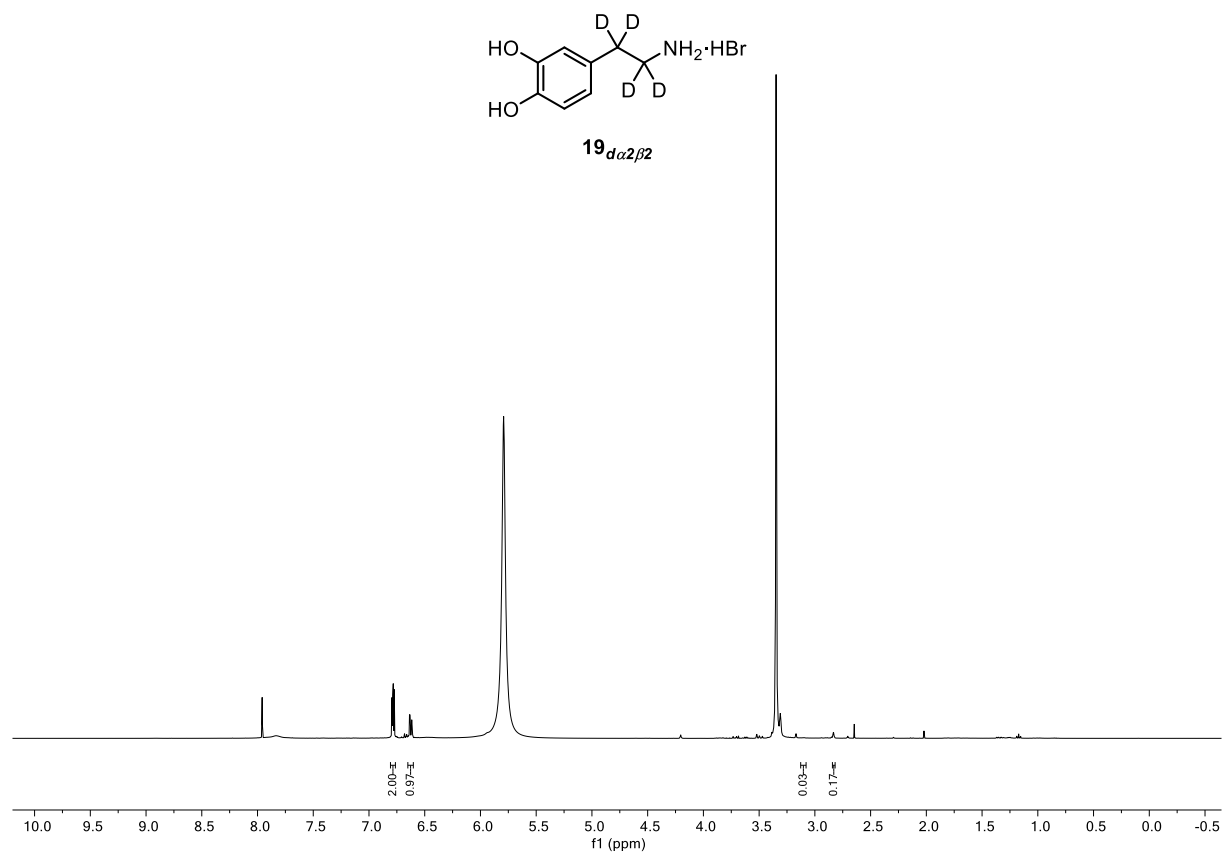

Figure S180. <sup>1</sup>H NMR spectrum of **19<sub>da2β2</sub>**.

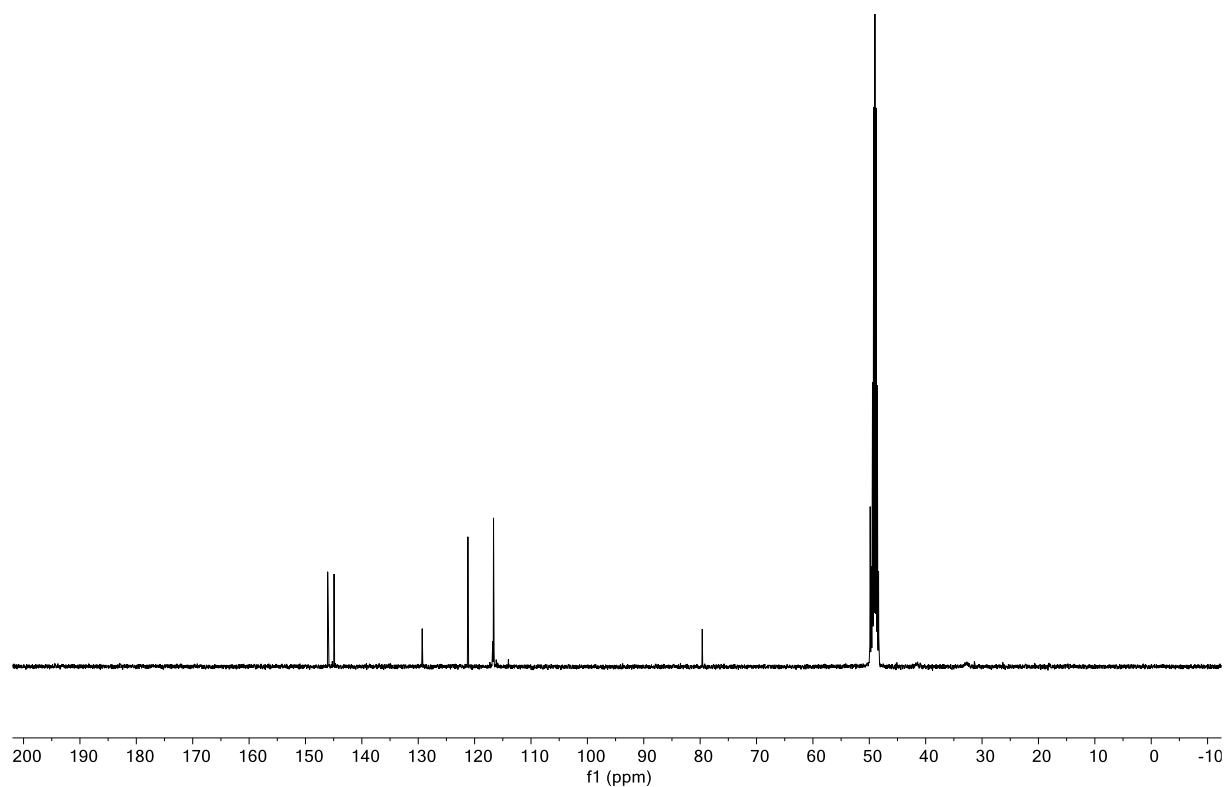

Figure S181. <sup>13</sup>C NMR spectrum of **19<sub>da2β2</sub>**.

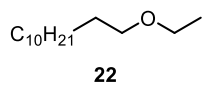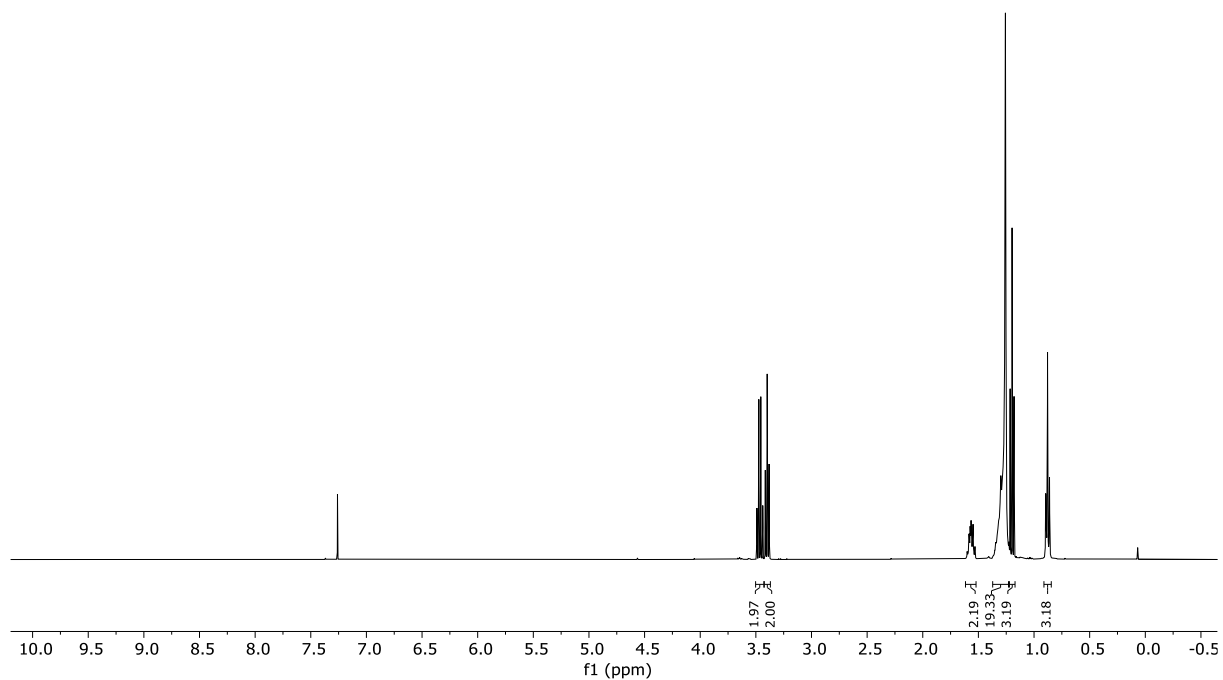

Figure S182. <sup>1</sup>H NMR spectrum of **22**.

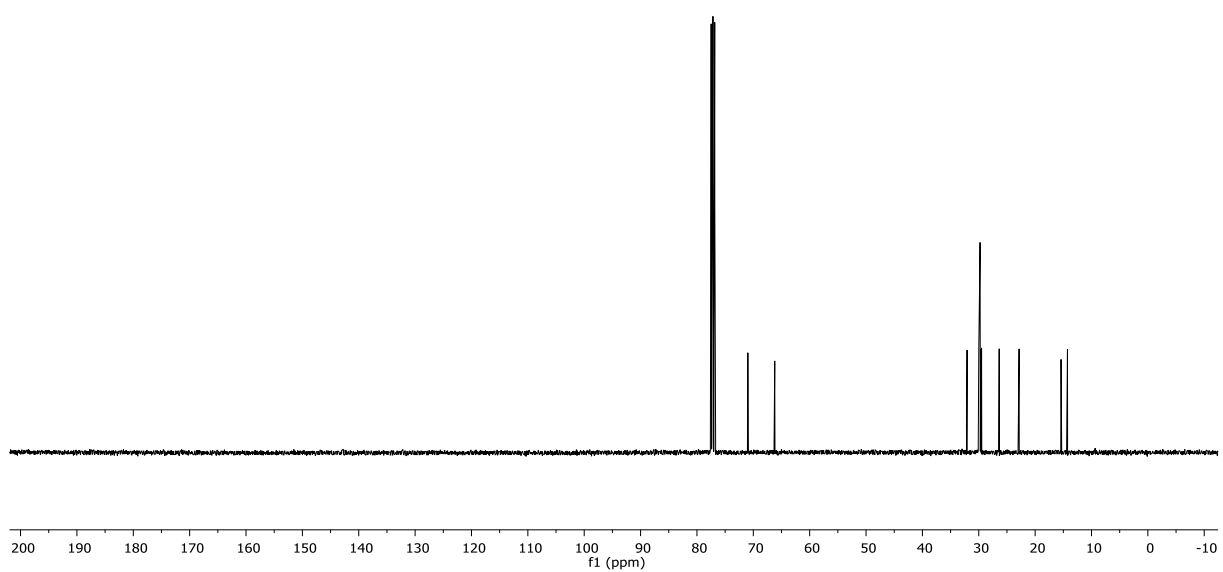

Figure S183. <sup>13</sup>C NMR spectrum of **22**.

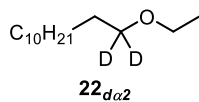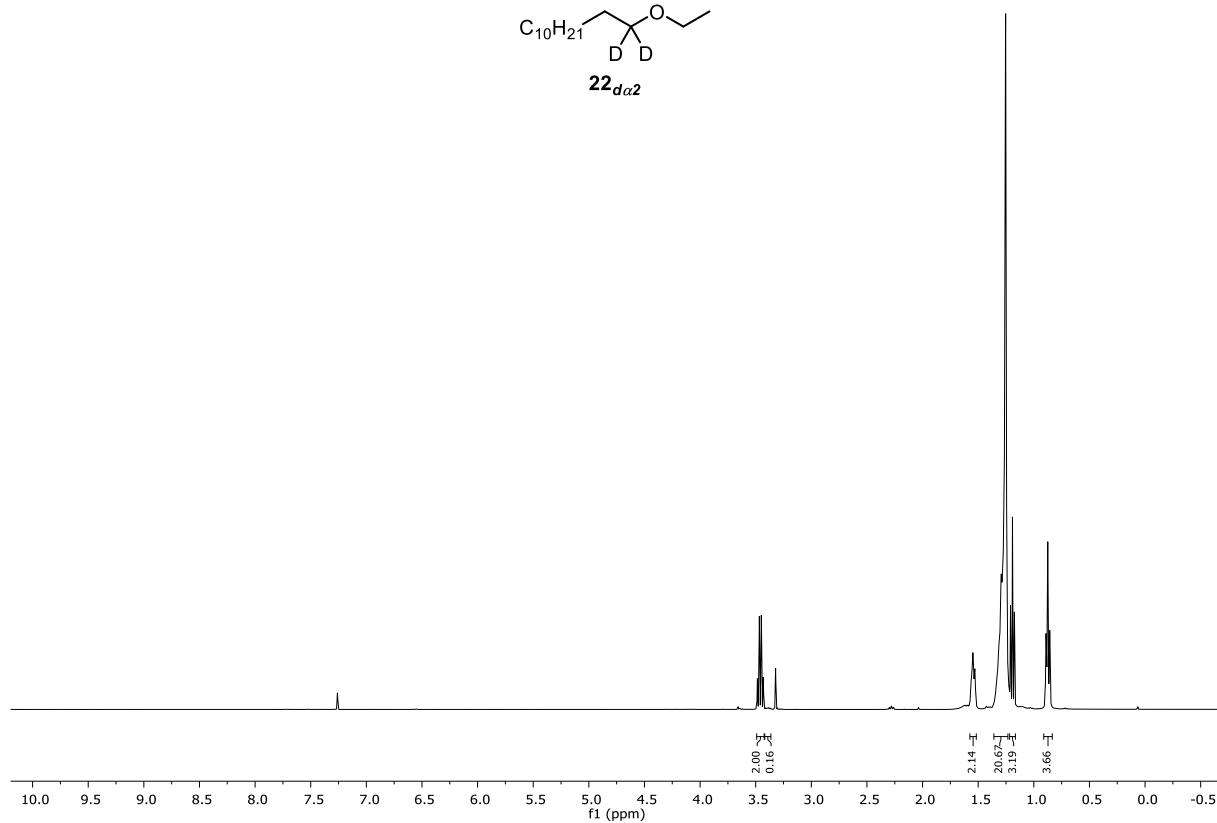

Figure S184.  $^1H$  NMR spectrum of **22<sub>da2</sub>**.

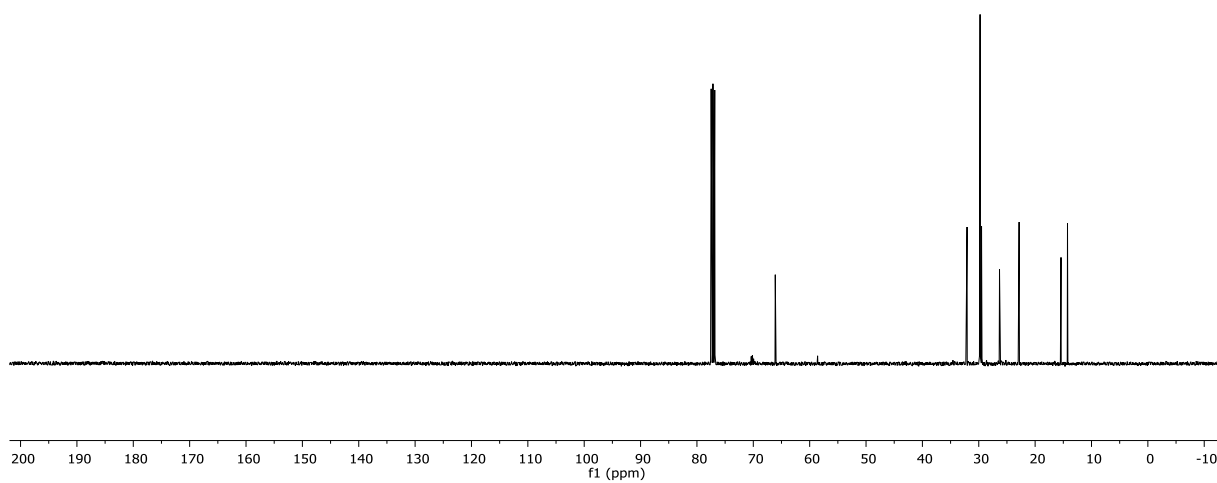

Figure S185.  $^{13}C$  NMR spectrum of **22<sub>da2</sub>**.

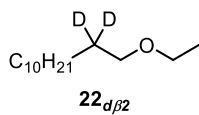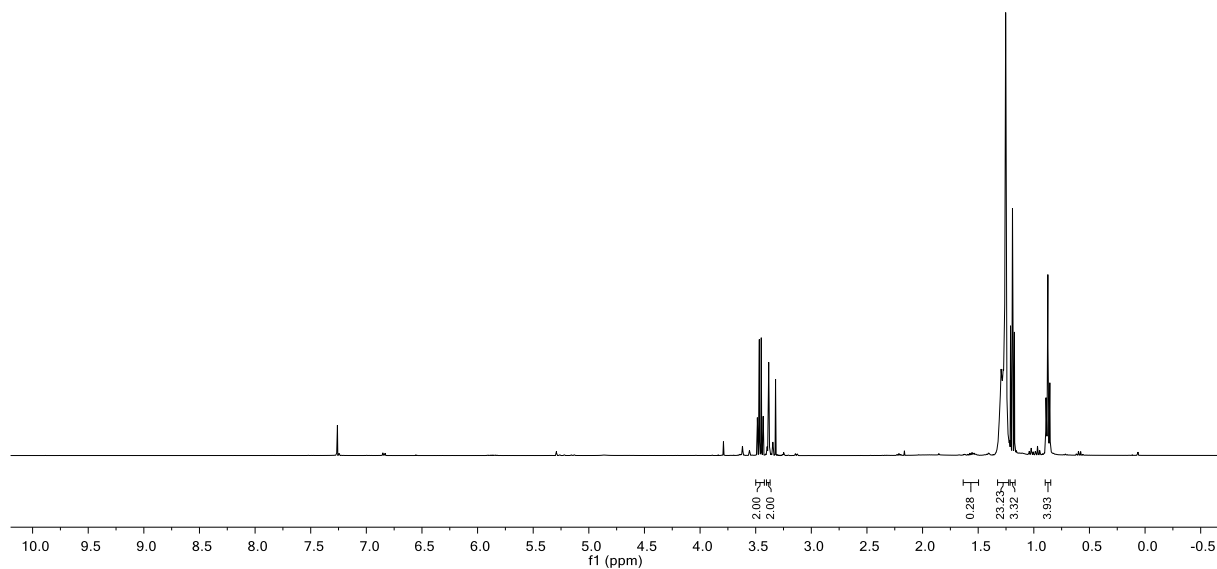

Figure S186. <sup>1</sup>H NMR spectrum of **22<sub>dβ2</sub>**.

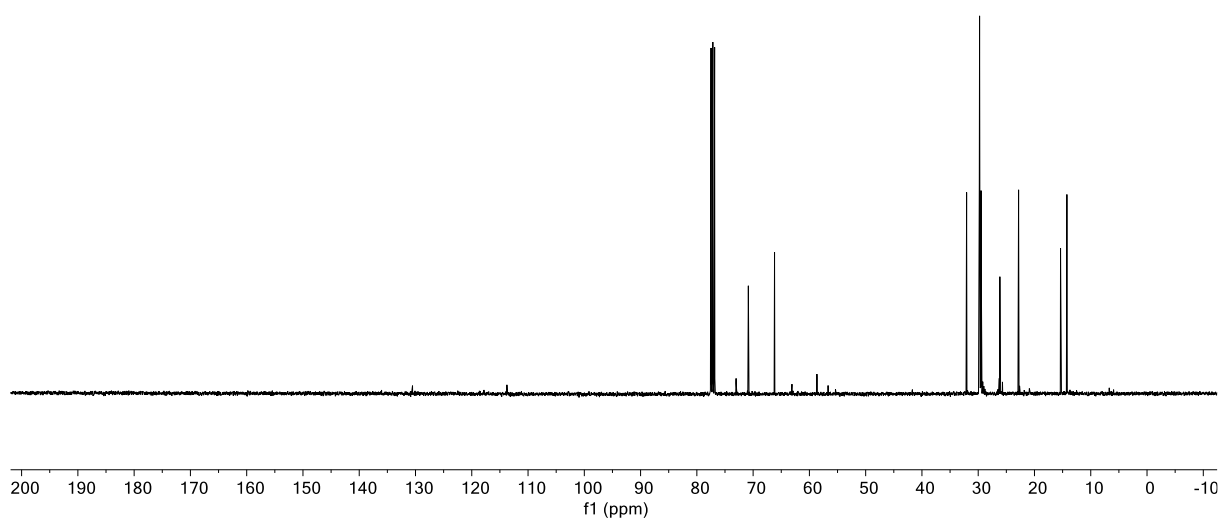

Figure S187. <sup>13</sup>C NMR spectrum of **22<sub>dβ2</sub>**.

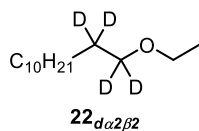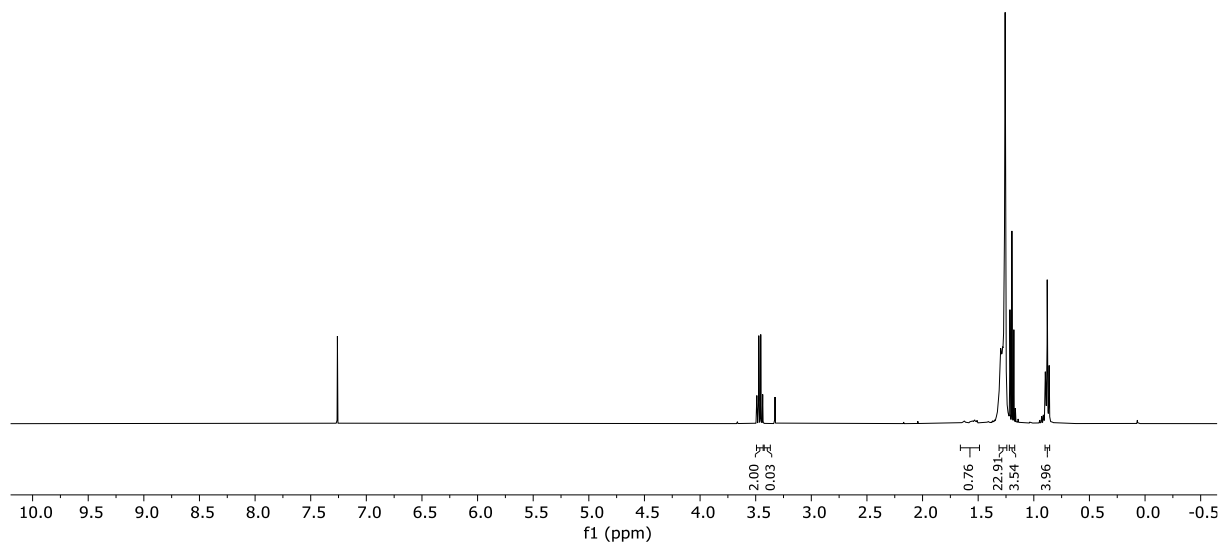

Figure S188. <sup>1</sup>H NMR spectrum of **22<sub>dα2β2</sub>**.

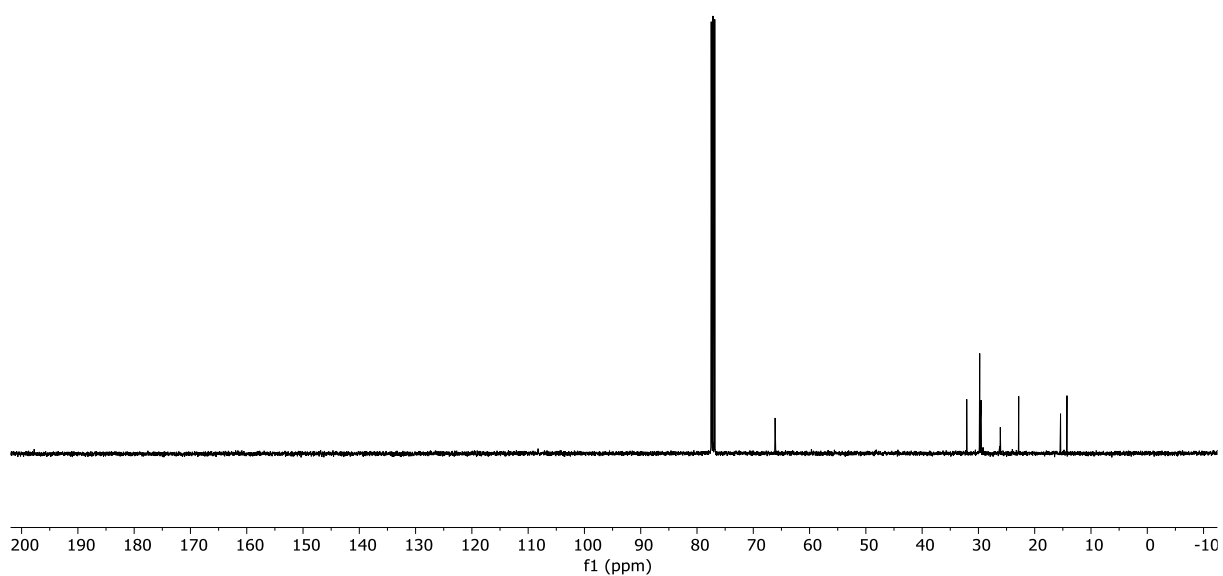

Figure S189. <sup>13</sup>C NMR spectrum of **22<sub>dα2β2</sub>**.

## References

- S1. R. M. G. Roberts, *J. Chem. Soc., Perkin Trans. 2*, 1976, 1183-1190.
- S2. K. Jouvin, J. Heimburger and G. Evano, *Chem. Sci.*, 2012, **3**, 756-760.
- S3. C. Tresse, C. Guissart, S. Schweizer, Y. Bouhoute, A.-C. Chany, M.-L. Goddard, N. Blanchard and G. Evano, *Adv. Synth. Catal.*, 2016, **356**, 2051-2060.
- S4. Y. Zhang, R. P. Hsung, K. C. M. Kurtz and E. L. Vera, *Org. Lett.*, 2004, **6**, 1151-1154.
- S5. K. Bailey, A. J. Ellis, R. Reiss, T. J. Snape and N. J. Turner, *Chem. Commun.*, 2007, 3640-3642.
- S6. Q. Ouyang, Q. Tong, R. Feng, K. Myint, P. Yang and X. Xie, *ACS Med. Chem. Lett.*, 2013, **4**, 387-392.
- S7. D. A. Powell and H. Fan, *J. Org. Chem.*, 2010, **75**, 2726-2729.
- S8. C. W. Cheung and S. L. Buchwald, *Org. Lett.*, 2013, **15**, 3998-4001.
- S9. R. R. Milburn and V. Snieckus, *Angew. Chem. Int. Ed.*, 2004, **43**, 888-891.
- S10. O. Crescenzi, C. Kroesche, W. Hoffbauer, M. Janssen, A. Napolitano, G. Protà and M. G. Peter, *Eur. J. Org. Chem.*, 1994, 563-567.
- S11. S. Preshlock, S. Calderwood, S. Verhoog, M. Tredwell, M. Huiban, A. Hienzsch, S. Gruber, T. C. Wilson, N. J. Taylor, T. Cailly, M. Schedler, T. L. Collier, J. Passchier, R. Smits, J. Mollitor, A. Hoepping, M. Mueller, C. Genicot, J. Mercier and V. Gouverneur, *Chem. Commun.*, 2016, **52**, 8361-8364.
- S12. D. O. J. Jang, S. H. Song and D. H. Cho, *Tetrahedron*, 1999, **55**, 3479-3488.
